# Supplementary material for: Identifying the Growth Factors for Improving Neointestinal Regeneration in Rats through Transcriptome Analysis Using RNA-Seq Data
Source: Hindawi journal article supplement (doi:10.1155/2018/4037865), 2018-12-13

# **Identifying the growth factors for improving neointestinal regeneration in rats through transcriptome analysis using RNA-Seq data**

**Short title: Identifying the growth factors for improving neointestinal regeneration**

Shyh-Chuan Jwo<sup>1,2,3,4,†,§</sup>, I-Fang Chung<sup>5,6,7†</sup>, Hsei-Wei Wang<sup>5</sup>, and Ting-Yu Chang<sup>5,8,§</sup>

<sup>1</sup>Division of General Surgery, Kaohsiung Municipal United Hospital, Kaohsiung, Taiwan. Postal address: No.976, Jhonghua 1st Rd., Gushan Dist., Kaohsiung City 804, Taiwan.

<sup>2</sup>College of Pharmacy and Health care, Tajen University, Pingtung County 90741, Taiwan. Postal address: No.20, Weixin Rd., Yanpu Township, Pingtung County 90741, Taiwan.

<sup>3</sup>Division of General Surgery, Chang Gung Memorial Hospital, Keelung, and College of Medicine, Chang Gung University, Taoyuan, Taiwan. Postal address: No. 222, Maijin Road, Anle District, Keelung City, 204, Taiwan.

<sup>4</sup>Division of General Surgery, Shin Kong Wu Ho-Su Memorial Hospital, Taipei, and School of Medicine, Fu Jen Catholic University, New Taipei City, Taiwan. Postal address: No. 95, Wenchang Road, Shilin District, Taipei City, 111, Taiwan

<sup>5</sup>Institute of Biomedical Informatics, National Yang-Ming University, Taipei, Taiwan.

Postal address: No. 155, Sec 2, Li-Nong St., Peitou Dist. Taipei City, 11221, Taiwan

<sup>6</sup>Center for Systems and Synthetic Biology, National Yang-Ming University, Taipei,

Taiwan. Postal address: No. 155, Sec 2, Li-Nong St., Peitou Dist. Taipei City, 11221,

Taiwan

<sup>67</sup>Preventive Medicine Research Center, National Yang-Ming University, Taipei,

Taiwan. Postal address: No. 155, Sec 2, Li-Nong St., Peitou Dist. Taipei City, 11221,

Taiwan

<sup>8</sup>Department of Medical Research, Changhua Christian Hospital, Changhua, Taiwan.

Postal address: No. 135, Nan-Hsiao St., Changhua City, Changhua County, 50006,

Taiwan

†: These 2 authors contributed equally to this work

§: To whom correspondence to be addressed.

**E-mail of all authors:**

Jwo, Shyh-Chuan: [jwosc1@gmail.com](mailto:jwosc1@gmail.com)

Chung, I-Fang: [ifchung@ym.edu.tw](mailto:ifchung@ym.edu.tw)

Wang, Hsei-Wei: [hwwang@ym.edu.tw](mailto:hwwang@ym.edu.tw)

Chang, Ting-Yu: [182451@cch.org.tw](mailto:182451@cch.org.tw)

**Corresponding authors:**

Ting-Yu Chang, Ph.D.

Department of Medical Research, Changhua Christian Hospital, Changhua, Taiwan.

e-mail: 182451@cch.org.tw; phone: 886-4-723-8595 ext.2325; fax: 886-4-7232942

Postal address: No. 135, Nan-Hsiao St., Changhua City, Changhua County, 50006, Taiwan.

Shyh-Chuan Jwo, MD, Ph.D.

Division of General Surgery, Kaohsiung Municipal United Hospital, Kaohsiung, Taiwan.

Postal address: No.976, Jhonghua 1st Rd., Gushan Dist., Kaohsiung City 804, Taiwan.e-

mail: [jwoscl@gmail.com](mailto:jwoscl@gmail.com) ; phone: 886-7-555-2565 ; fax: 886-7-555-3984

†: These 2 authors contributed equally to this work

§: To whom correspondence to be addressed.

## **Supplementary information**

Suppl. Table 1: Gene Ontology analysis on 1-week A condition up-regulated genes

Suppl. Table 2: Gene Ontology analysis on 1-week N condition up-regulated genes

Suppl. Table 3: Oligonucleotide sequences for qPCR validation of gene expression

Suppl. Figure 1: Flowchart of this study

Suppl. Figure 2: Stage specific genomic analysis for 1-week N or 1-week A conditions

Suppl. Figure 3: Stage specific genomic analysis for 1-, 4-, and 12-week N vs. A conditions

**Suppl. Table 1. Gene Ontology analysis on 1-week A condition up-regulated genes**

|            |                                                     |
|------------|-----------------------------------------------------|
| GO:0007049 | cell cycle                                          |
| GO:0000278 | mitotic cell cycle                                  |
| GO:0022402 | cell cycle process                                  |
| GO:0044283 | small molecule biosynthetic process                 |
| GO:0006261 | DNA-dependent DNA replication                       |
| GO:0006259 | DNA metabolic process                               |
| GO:1903047 | mitotic cell cycle process                          |
| GO:0016053 | organic acid biosynthetic process                   |
| GO:0046394 | carboxylic acid biosynthetic process                |
| GO:0044711 | single-organism biosynthetic process                |
| GO:0006260 | DNA replication                                     |
| GO:0009396 | folic acid-containing compound biosynthetic process |
| GO:0007067 | mitotic nuclear division                            |

**Suppl. Table 2. Gene Ontology analysis on 1-week N condition up-regulated genes**

|            |                                                     |
|------------|-----------------------------------------------------|
| GO:0006952 | defense response                                    |
| GO:0002376 | immune system process                               |
| GO:0016477 | cell migration                                      |
| GO:0060326 | cell chemotaxis                                     |
| GO:0006954 | inflammatory response                               |
| GO:0008283 | cell proliferation                                  |
| GO:0007166 | cell surface receptor signaling pathway             |
| GO:0070887 | cellular response to chemical stimulus              |
| GO:0048870 | cell motility                                       |
| GO:0051674 | localization of cell                                |
| GO:0006955 | immune response                                     |
| GO:0042127 | regulation of cell proliferation                    |
| GO:0050900 | leukocyte migration                                 |
| GO:0048584 | positive regulation of response to stimulus         |
| GO:0030595 | leukocyte chemotaxis                                |
| GO:0010562 | positive regulation of phosphorus metabolic process |
| GO:0045937 | positive regulation of phosphate metabolic process  |
| GO:0032496 | response to lipopolysaccharide                      |
| GO:0097529 | myeloid leukocyte migration                         |
| GO:0009605 | response to external stimulus                       |
| GO:0040011 | locomotion                                          |
| GO:0034097 | response to cytokine                                |
| GO:0071345 | cellular response to cytokine stimulus              |
| GO:0002237 | response to molecule of bacterial origin            |
| GO:0002682 | regulation of immune system process                 |
| GO:0001568 | blood vessel development                            |
| GO:0006928 | movement of cell or subcellular component           |
| GO:0097530 | granulocyte migration                               |
| GO:0001944 | vasculature development                             |
| GO:0051239 | regulation of multicellular organismal process      |
| GO:1990266 | neutrophil migration                                |
| GO:0072358 | cardiovascular system development                   |
| GO:0009617 | response to bacterium                               |
| GO:0006935 | chemotaxis                                          |

|            |                                              |
|------------|----------------------------------------------|
| GO:0042330 | taxis                                        |
| GO:0001816 | cytokine production                          |
| GO:0071621 | granulocyte chemotaxis                       |
| GO:0002684 | positive regulation of immune system process |
| GO:0048514 | blood vessel morphogenesis                   |
| GO:0071310 | cellular response to organic substance       |

**Suppl. Table 3. Oligonucleotide sequences for qPCR validation of gene expression**

| Gene    | Forward               | Reverse              |
|---------|-----------------------|----------------------|
| GAPDH   | GTGGCTGGCTCAGAAAAAGG  | GGGAGATTCAGTGTGGTGG  |
| VEGFB   | CAGCCATCAAAGCAGAATCA  | ATGTAGGTGGGTGCCTGAAG |
| TIMP1   | TGCAGAACATTGGCTTTCTG  | ATGGCTGAACAGGGAAACAC |
| TGFB3   | CTCTCTGTCCACTTGCACCA  | GTTTCCTGAGTGCAGCCTTC |
| TGFB2   | CCACACACTCTTTCCCTGGT  | TTCCATCACCCCCATAAAA  |
| RABEP2  | GGGAGCAACTGCAGGTAGAG  | CACAGGCTAGGCAAGTCCTC |
| PDF     | GAGGTGTGTGGGACTGAGGT  | CAGGAGGAGGCACTCAACTC |
| PDGFD   | GGGTATCGGGTTCTTTCCAT  | TTCCTCGGAAATTGGACTTG |
| NTF4    | CACTGGCTCTCAGAATGCAA  | GTAGAGCAGTCGAGCCATCC |
| NGF     | CCACCAACTGGAGACCAAGT  | TTGTCGTGGTCATGGTGTCT |
| NENF    | TGGAGGGCAGACAGAGAAGT  | TGAGGAAGTCACTGGTGCAG |
| MDK     | AGCCTGGAAGGAAGGTTTGT  | TAGCAGCCCCAGCACTCTAT |
| INHA    | GCTCTACCAGGGAGCATGAG  | CACCTTCCTCCTAGCTGACG |
| IL6     | CCAGGGCATTTTCCAGTTTA  | ACTGGCATGGGGACTAACAG |
| IL11    | GTAGCACATGGTGGTTCACG  | GCAACACATGGTGGCTTATG |
| IGF1    | GCACACACAGCCTGAAAAGA  | GAGACTTGCCTTTGGCAGAC |
| HDGFRP3 | CCCTGCAGTCACCACCTTAT  | CAGACAGGTCCCTTGAGAGC |
| GDF6    | TTGAACCTTTGCCTTCTGCT  | AAAAAGCTCAGCCAGTGGA  |
| GDF3    | GAGAATGGCCTTGAGAGTGC  | GTCCTGGTACCTGGGCTGTA |
| CSF3    | CCTTGGAGCAAGTGAGGAAG  | GTGCCCCATGTTATGTTTCC |
| CSF1    | GCAAGCAAGCAAAACATTCA  | TTCCTCTCCCTTCCCAGAAT |
| CLEC11A | AGATGGGACAGTGGGTTTCTG | CCAGACCTCTTTGCCTTCAG |
| CD320   | GCAAGGGCTCTACCACTGAG  | ATGTTCCAGGGTGCAGAAAC |
| VEGFA   | TGCTTCCTAGTGGGCTCTGT  | GATGCGAATCCTTTCCAAAA |
| TGFA    | GCAAGTTCTGCCTGTTCTCTC | GCACTGAACCAACCCACTTT |
| PDGFC   | AACGTGTTCTCCTCCACACC  | AGCTCTGCCCAAGACCTGTA |
| OSGIN1  | CCCAGGAGCCTGTGTGTATT  | TCCTGCTTCCTTGTTTGCTT |
| MANF    | TGCAGACAAGCAGATTGACC  | AGCAGGAACTGGGCAGACTA |
| GPI     | GCAGAGGAGGGTTCTCTGTG  | GGCGGTCACACCTGTAATCT |
| BMP8B   | AGGACATAGGGAACCCATCC  | TCTGCTCTTCCTGGGACACT |
| BMP8A   | GGACAGTGGGGAGGTACAGA  | ACAGAGGCTTGGGTGCTCTA |
| BMP5    | GTACATGGCACGGAGGAAGT  | ACAAACGCAGCCCAAATAAC |
| BMP2    | AGGGTCTAGGGGATGTTGCT  | CTCACATCTGCTTGCCAAAA |
| TGFB1   | CTGGAGGCTGAGGCAATAAG  | AGAAGGCAGAGGTGAGTGGA |



|       |                      |                       |
|-------|----------------------|-----------------------|
| PDGFB | GGAGGTCACTGCTGCTTTTC | GACTTTCCTTGGAGCTGTGC  |
| OSM   | GTTTCAAAAACGGGCAGTGT | CCACTATGAGCCCAGGTTGT  |
| JAG2  | ATTGGGGGATTTGTCTAGGG | CATCCCAGCAGTCAGAGTGA  |
| IL34  | GGAGGGGTGGCAAAATAAAT | TCTCCACTGCCACTTCCTCT  |
| TFF1  | CACCAAGGAGCCAATTCCTA | TTGAAAGGGCAACAAATTCC  |
| REG1A | GCAATGTCAGTCATGGGTTG | GCCTGCCCCAAATCTTTCATA |
| PDGFA | ACCCCTGCTTCAGTCTCTCA | AGAAGCCTCACCTCTGTCCA  |
| NTF3  | GCTCAACGAAAGCCAAAGTC | ACAGAACCACAGCCCGTATC  |
| LEP   | TGGCTCTTCTGCTTTTGGTT | CCCAACAGCACATAACATGC  |
| FGF13 | GCATGGGTGTTTAGGCAAGT | ATCCTAAGCGTAGCCAGCAA  |
| BMP3  | CCGAAATCCAATCTTCCTCA | AGAGGAGCCAGTGGTCAGAA  |

---

# S1 Flowchart of this study

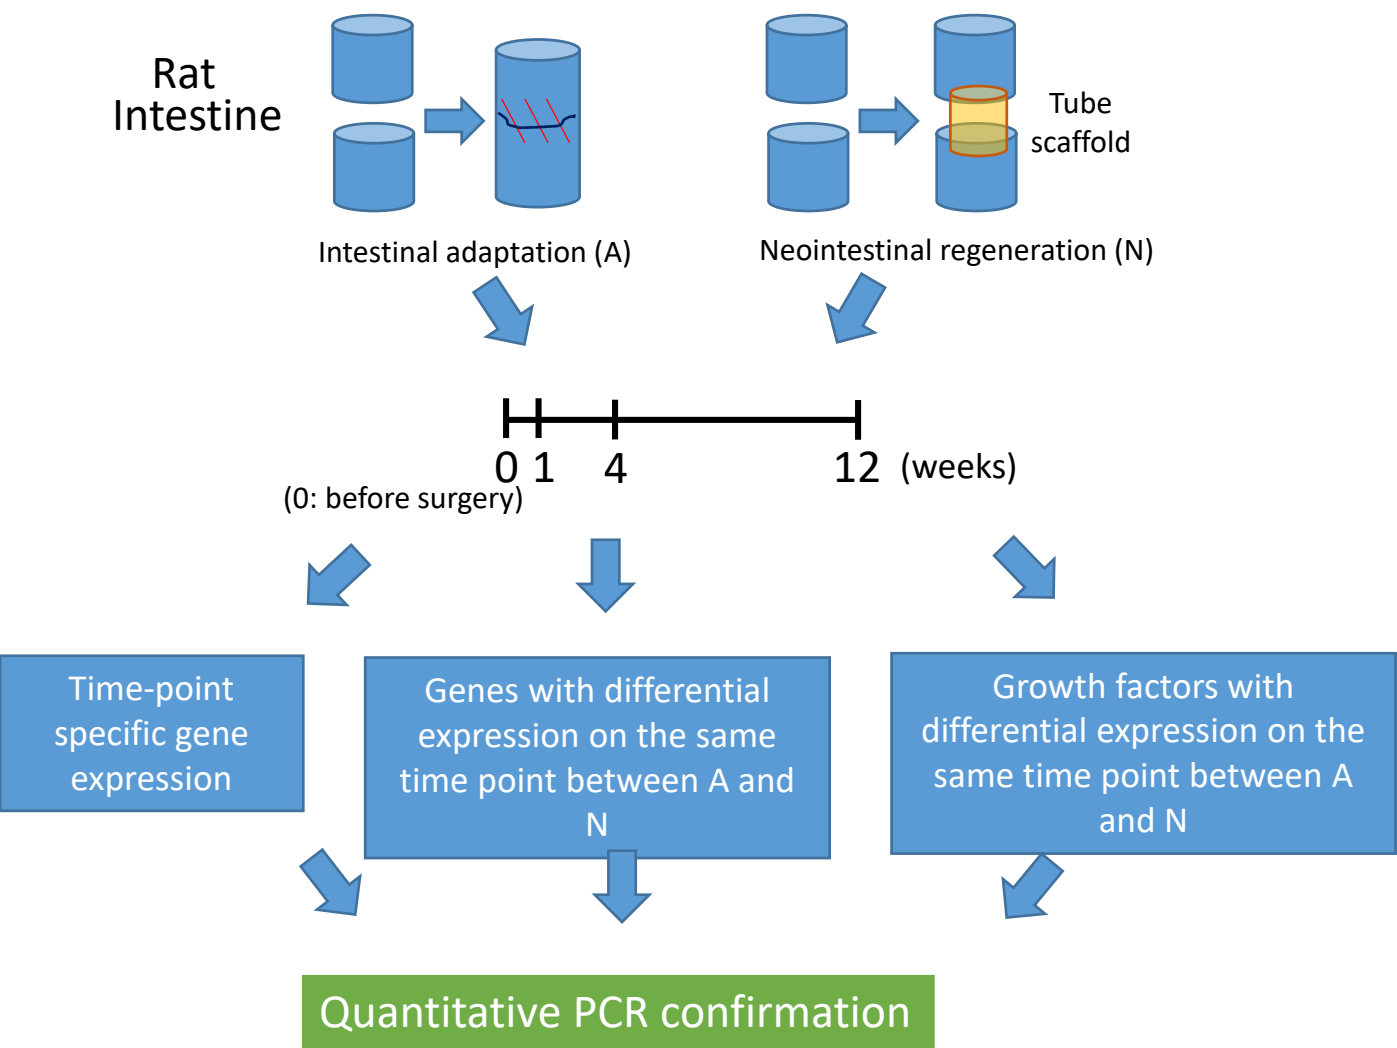

# S2A Stage specific canonical pathway

## week 1 N condition

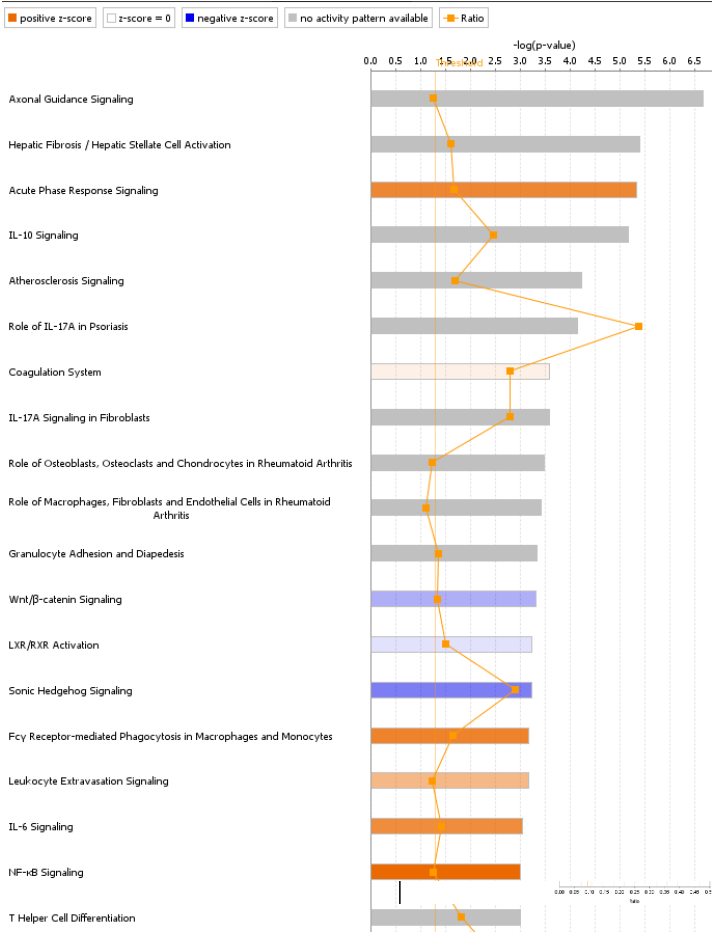

S2B Stage specific gene interaction network  
week 1 N condition

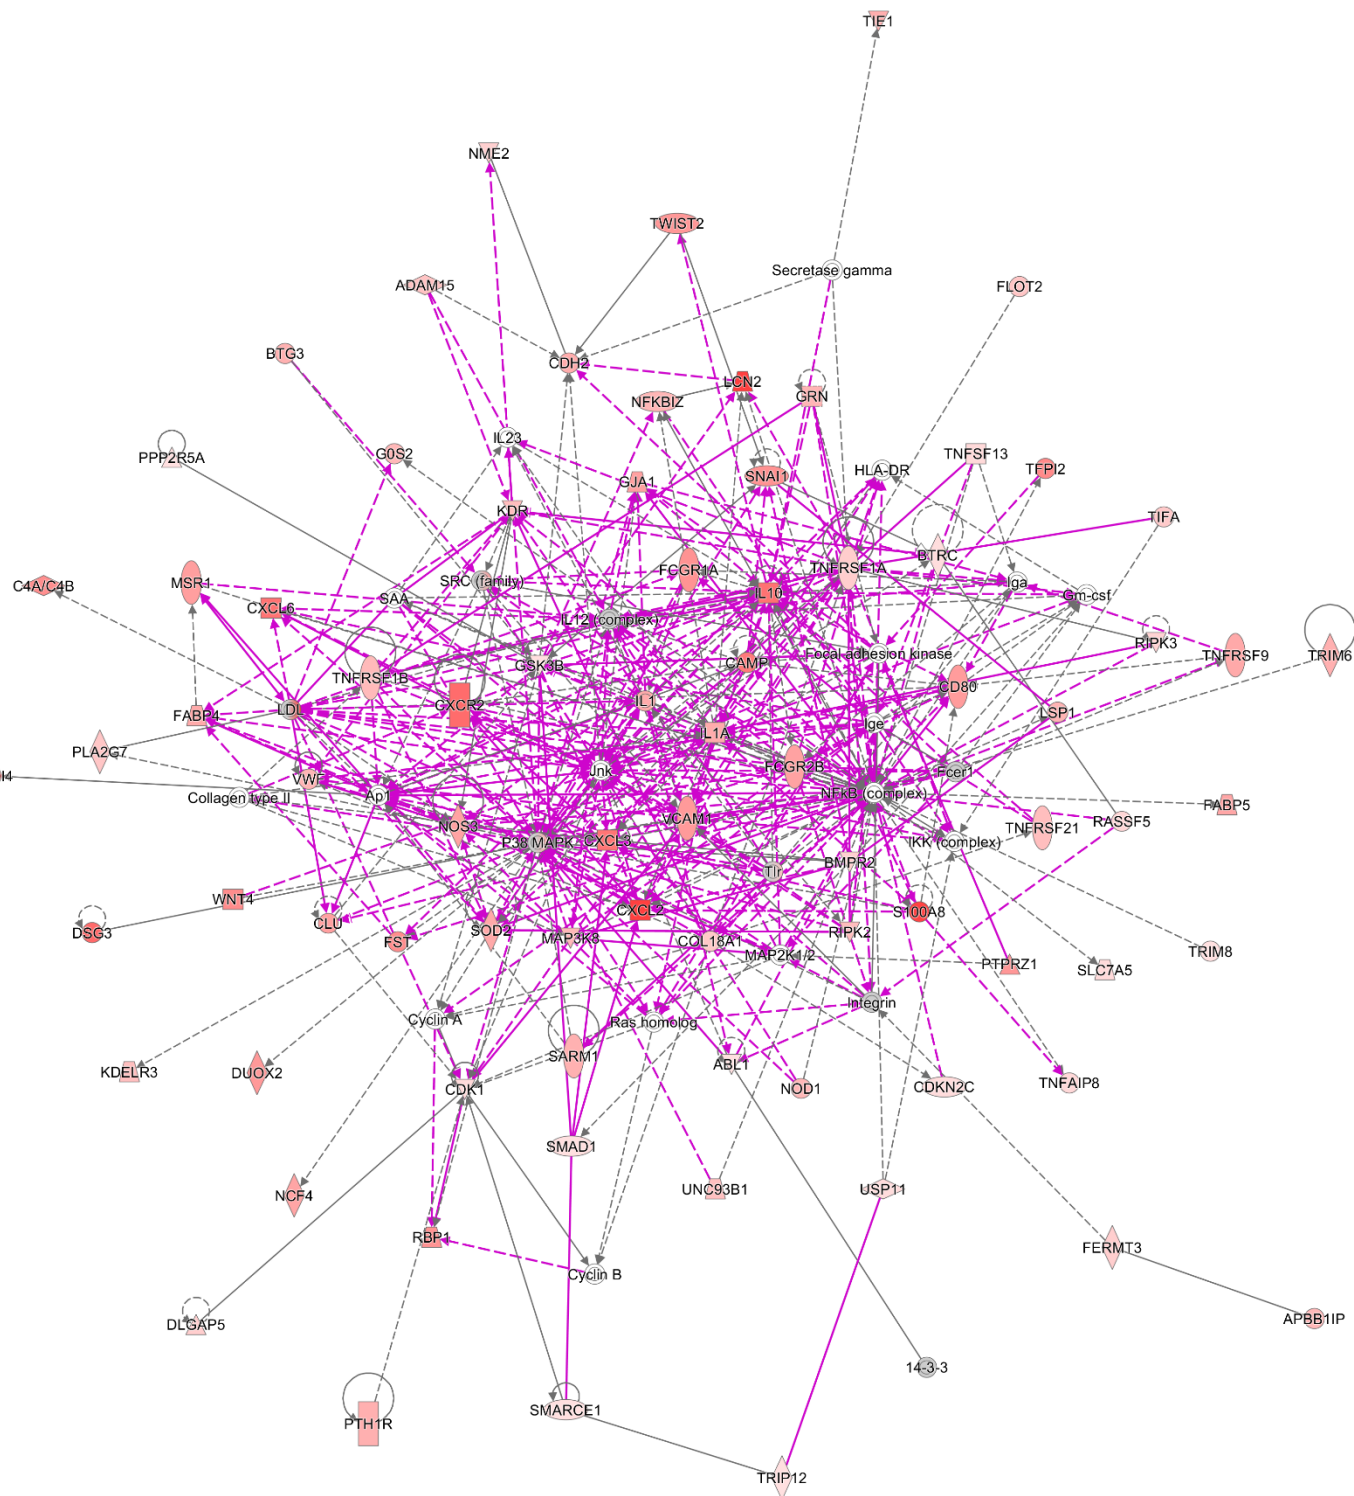

# S2C Stage specific gene interaction network with sub-cellular localization week 1 N condition

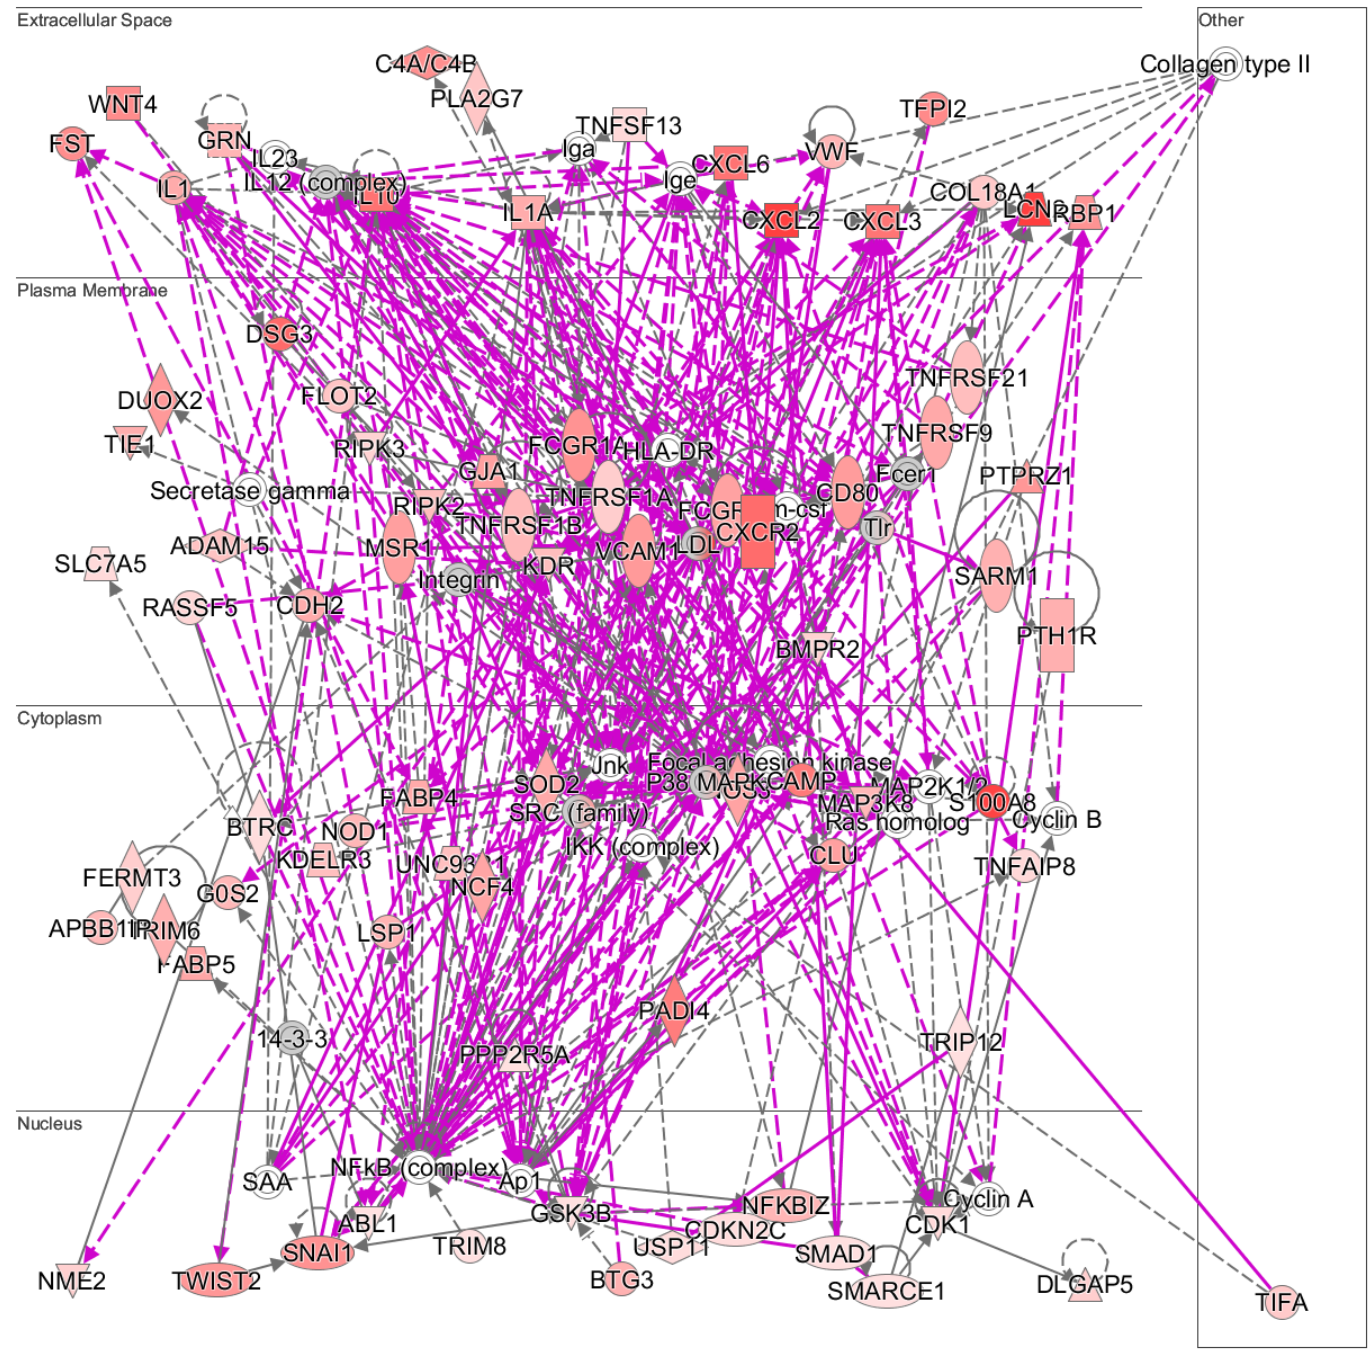



# S2D Stage specific Gene Ontology analysis

week 1 N condition

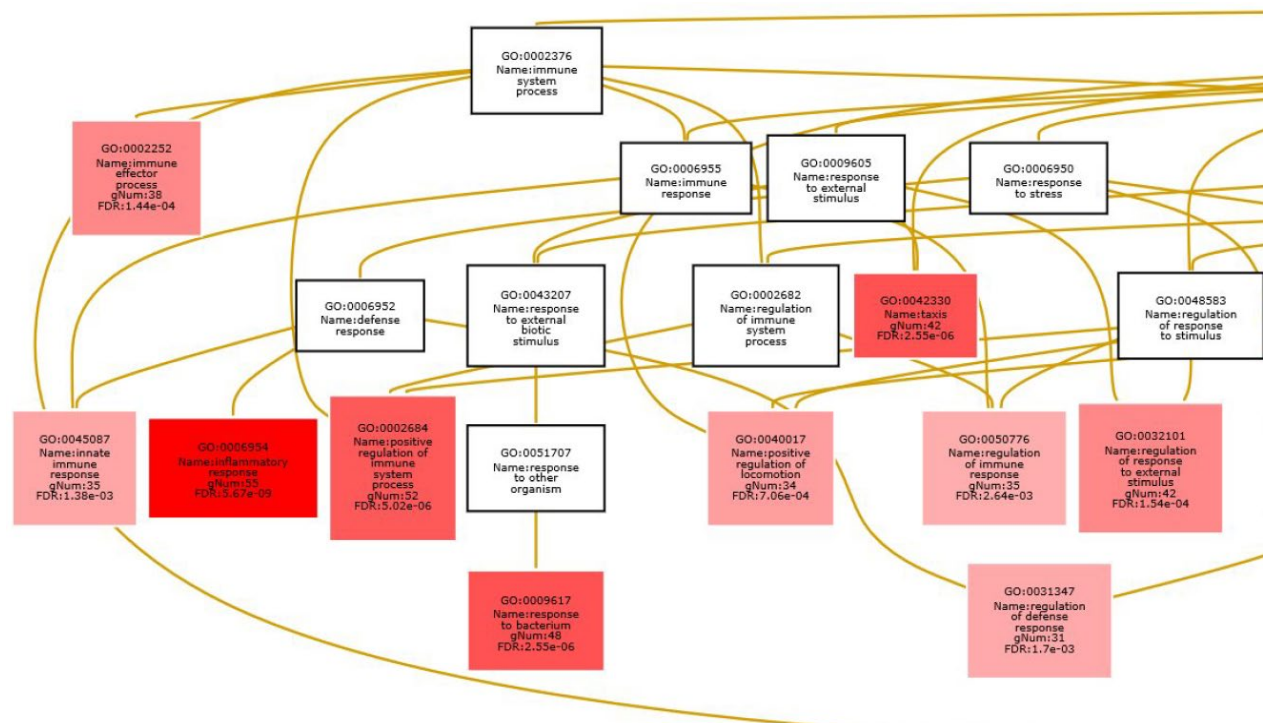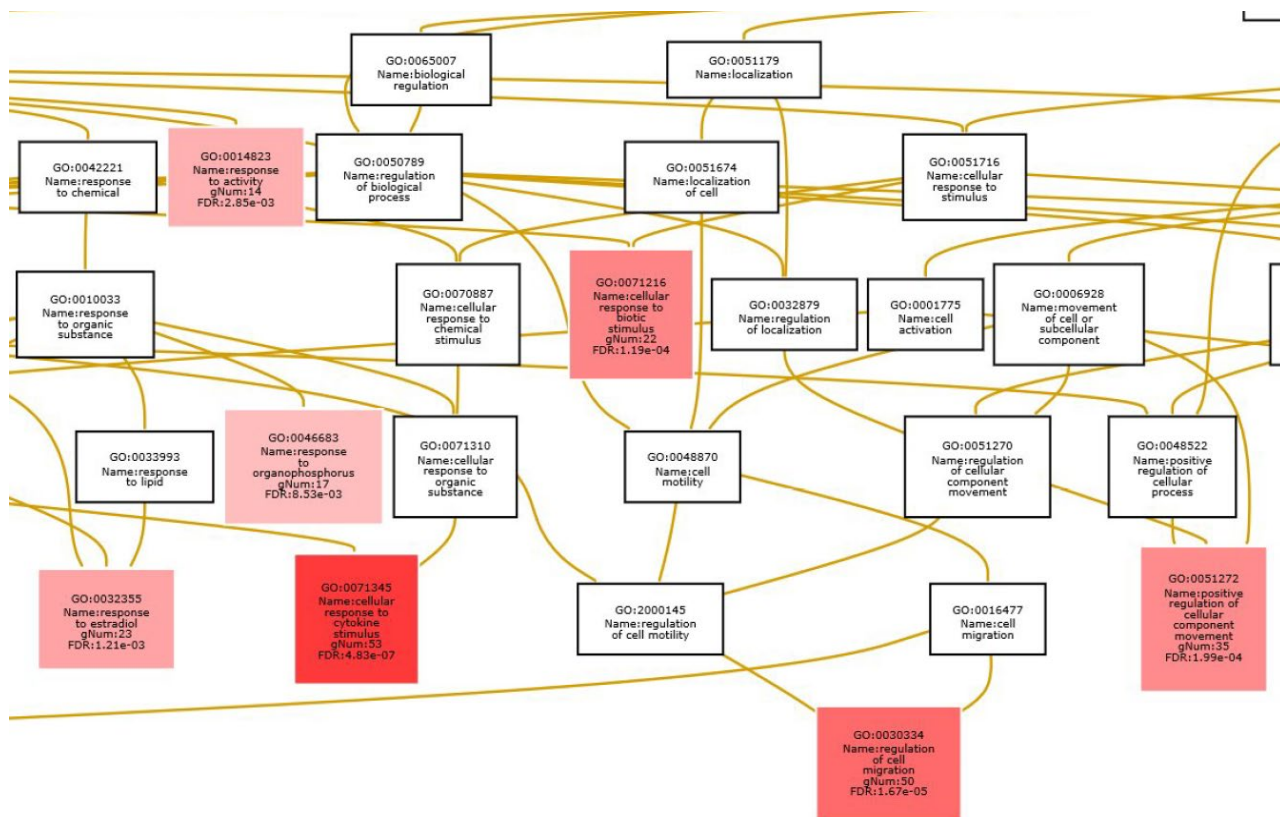

# S2E Stage specific canonical pathway

## week 1 A condition

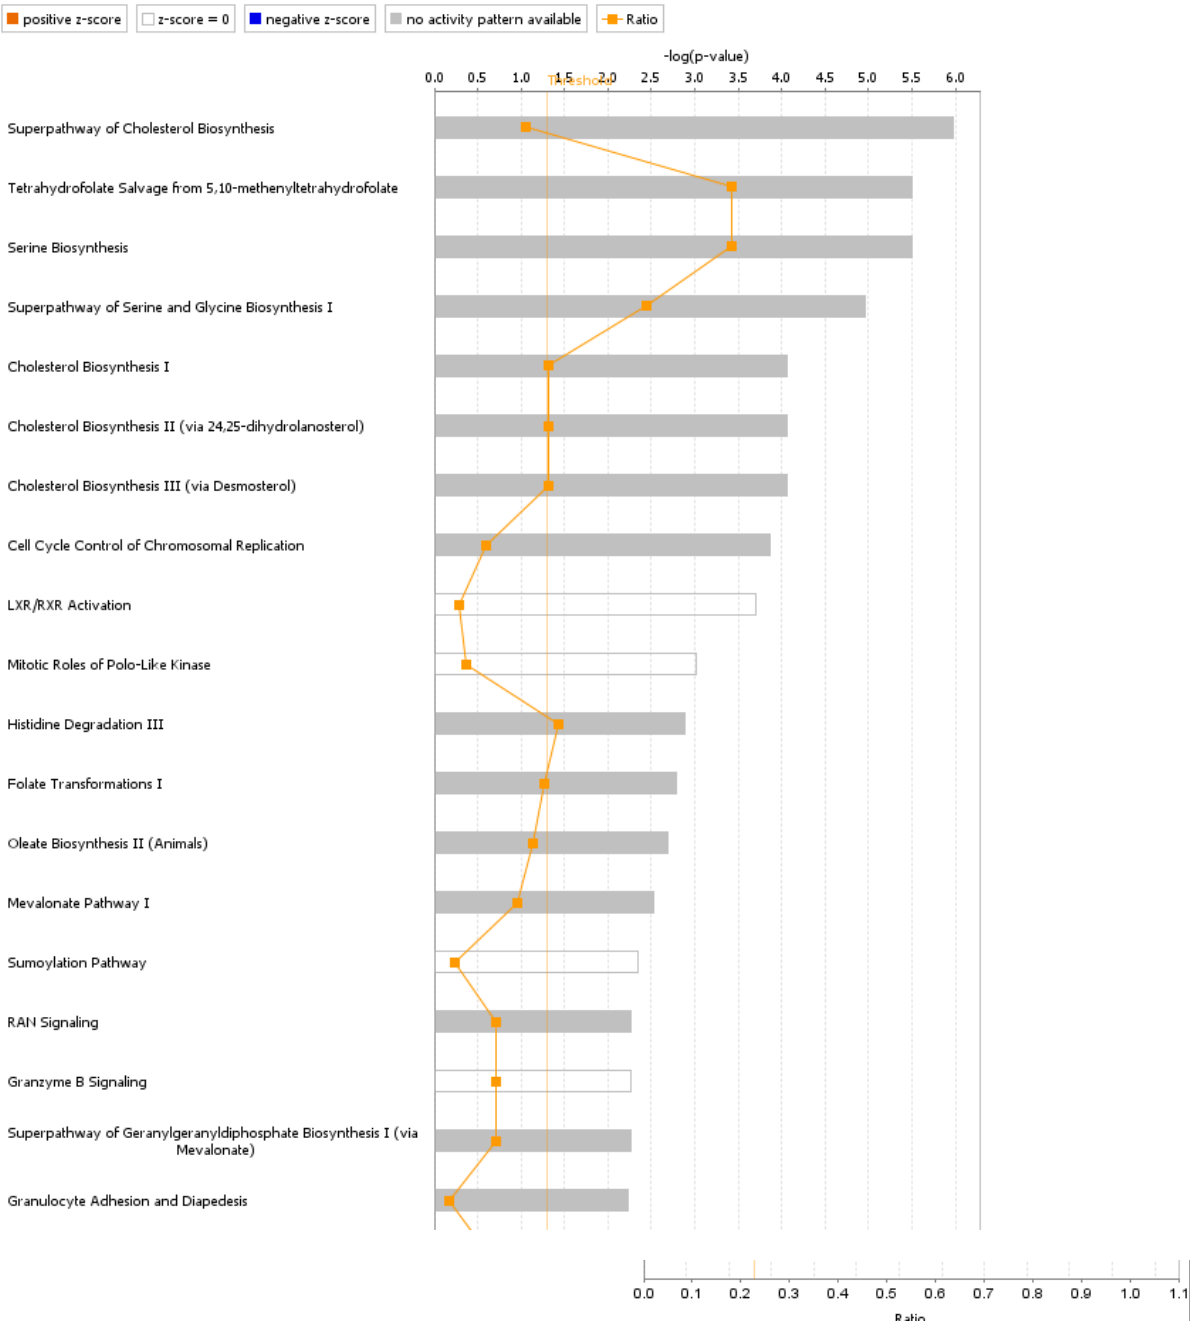

S2F Stage specific Gene Ontology analysis

week 1 A condition

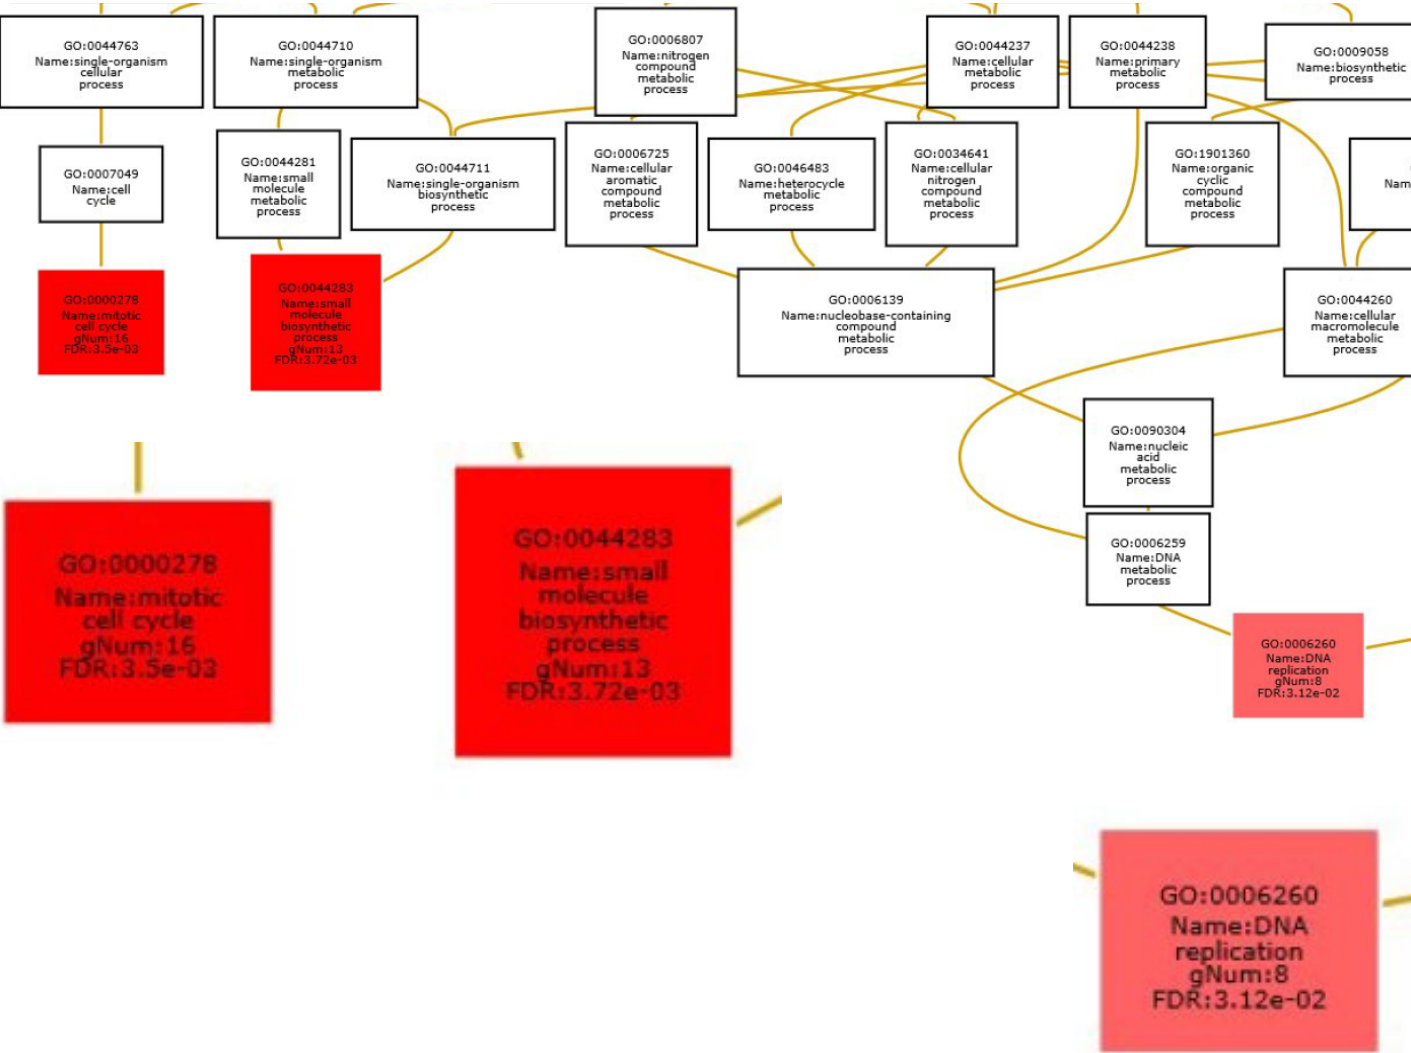



S2G Stage specific gene interaction network  
week 1 A condition

Networks 2,4,5 Merged 1

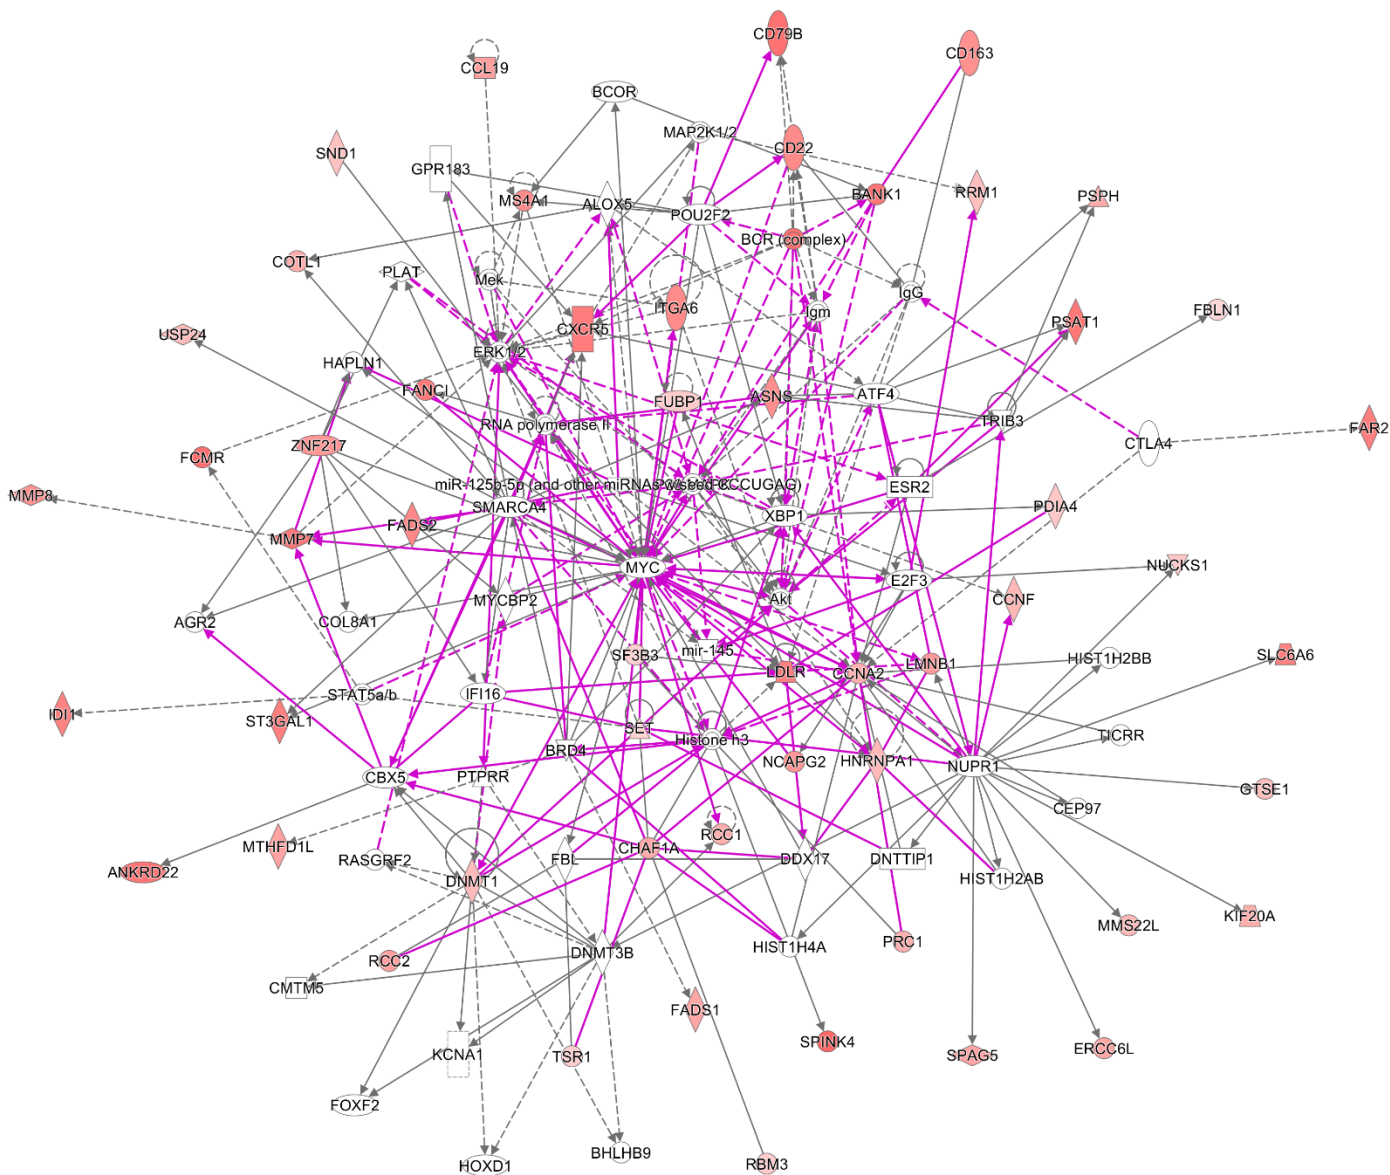

S2H Stage specific gene interaction network with sub-cellular localization  
week 1 A condition

## Networks 2,4,5 Merged 1

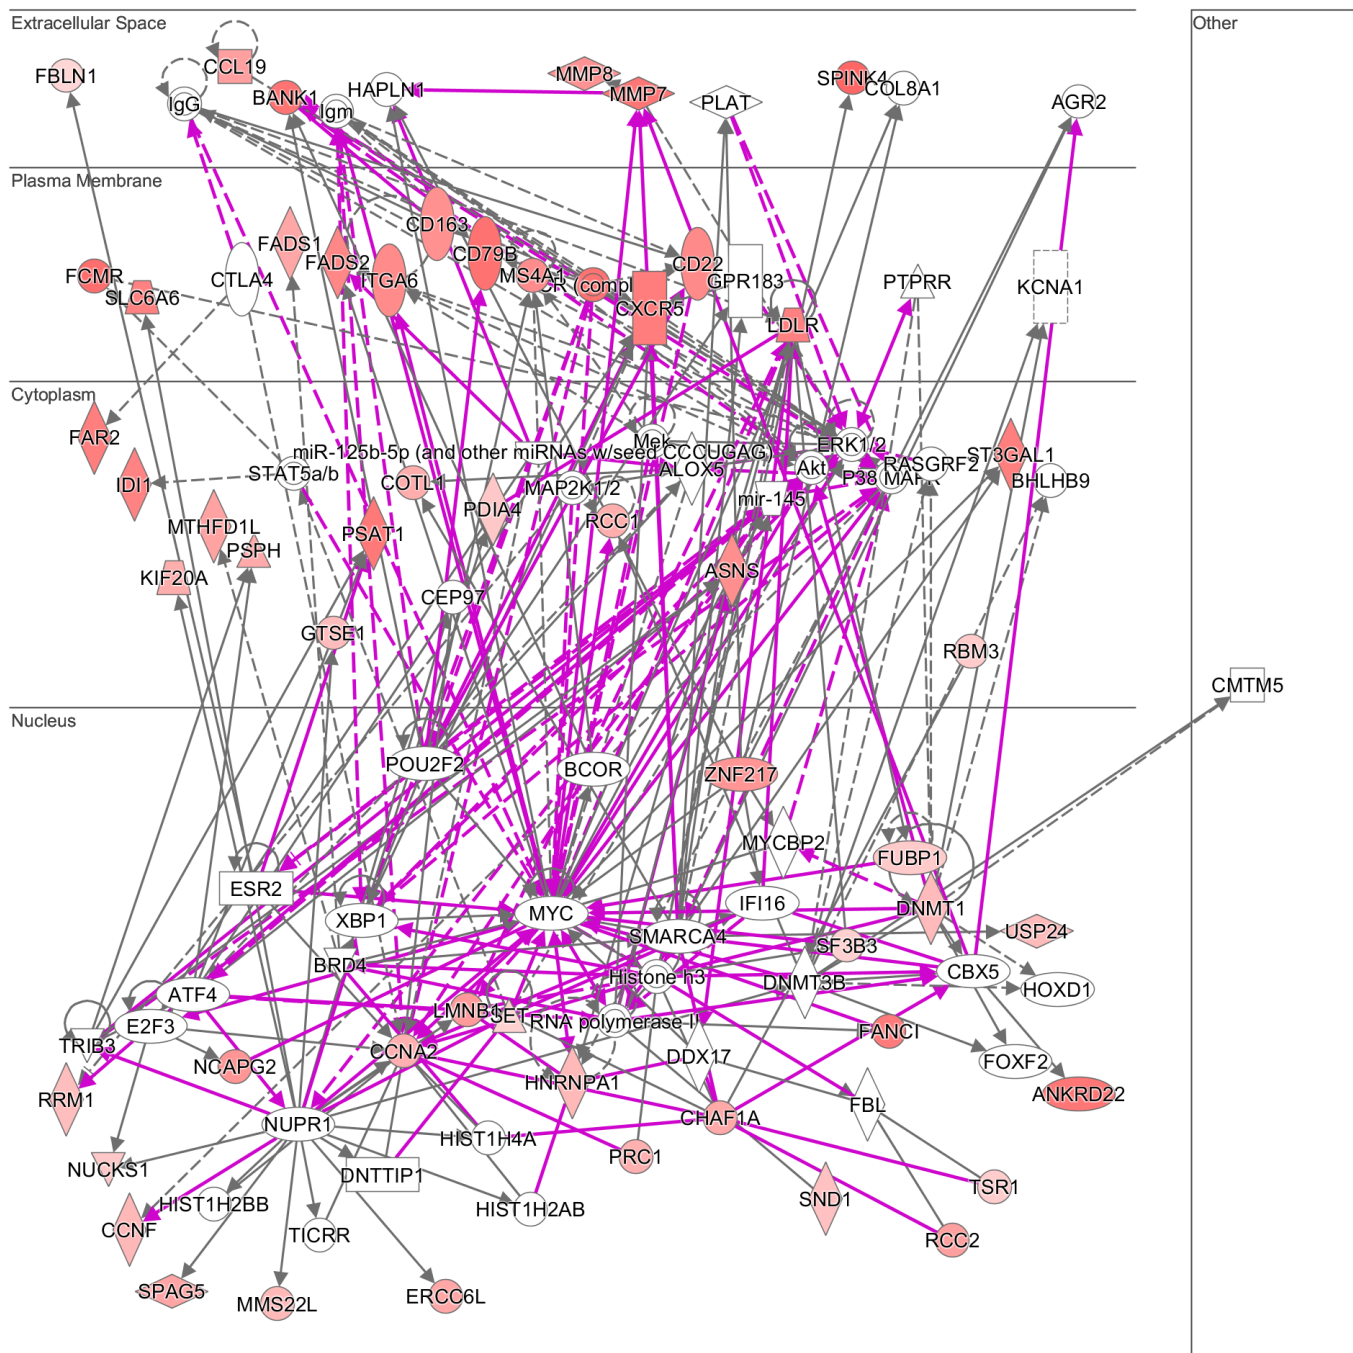

# S3A Stage specific canonical pathway

## week 1 N vs week 1 A condition, N upregulated

Analysis: 1N-1A-Nup - 2017-04-14 06:07 下午

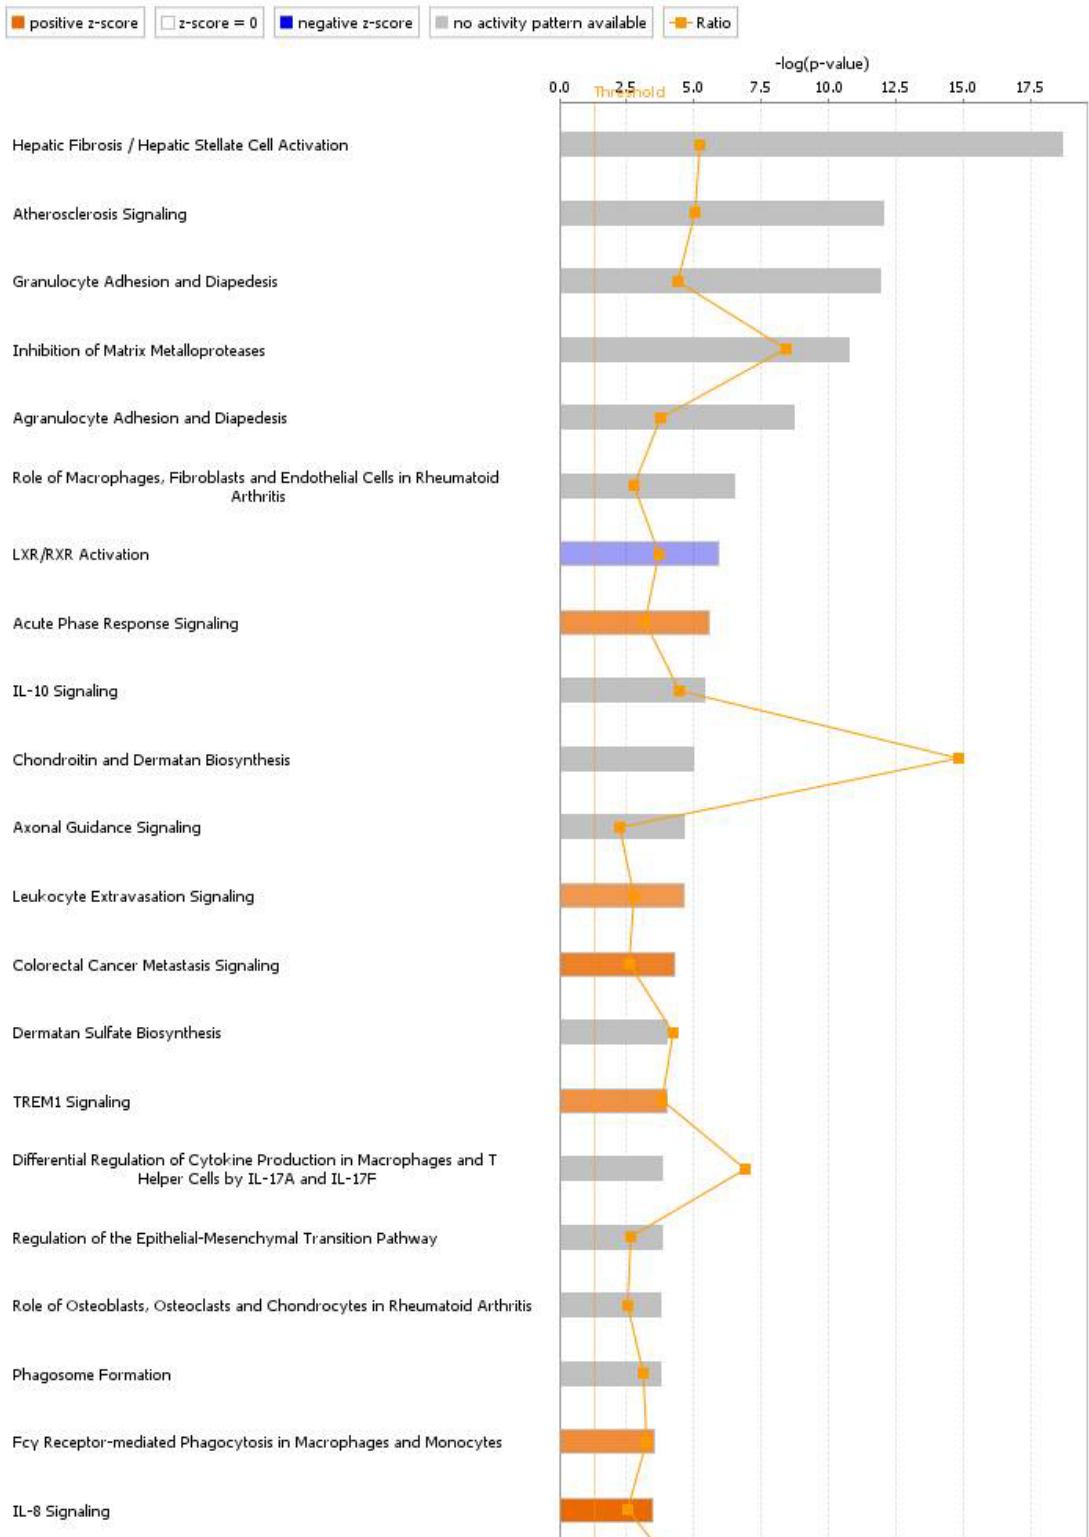

# S3B Stage specific canonical pathway

## week 1 N vs week 1 A condition, A upregulated

Analysis: 1N-1A-Ndown- 2017-04-14 06:09 下午

positive z-score   z-score = 0   negative z-score   no activity pattern available   Ratio

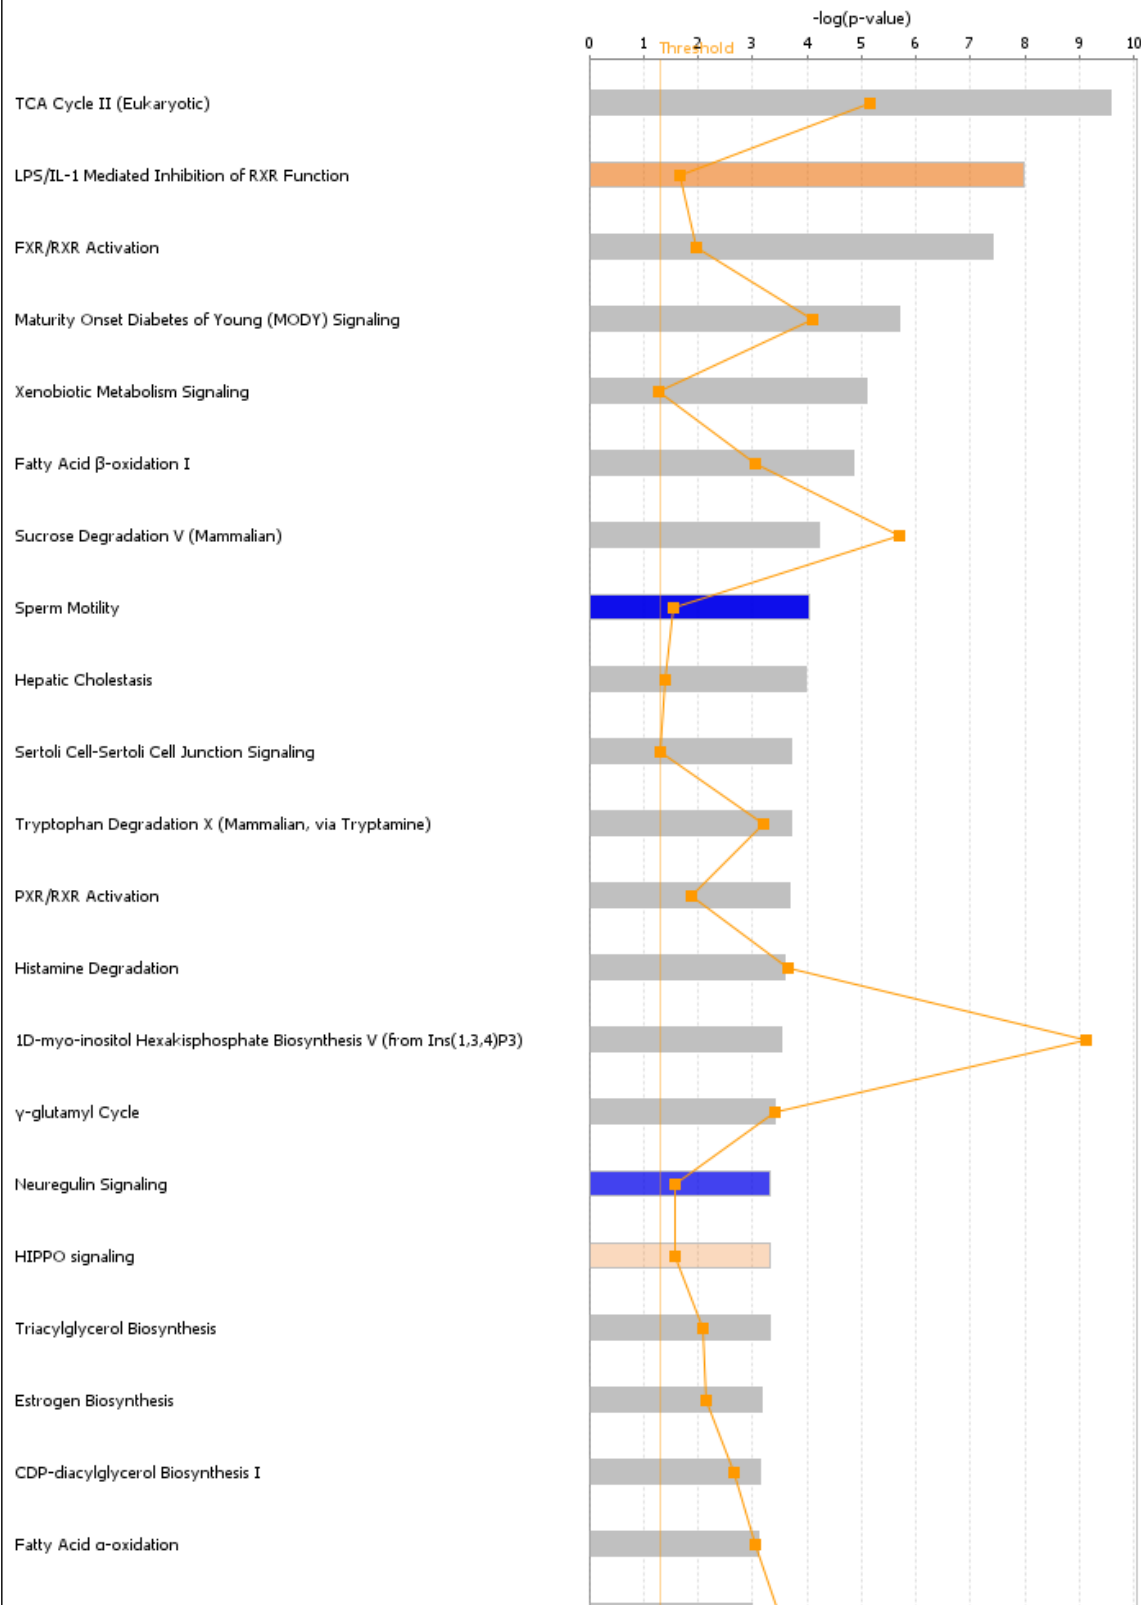

# S3C Stage specific canonical pathway

## week 4 N vs week 4 A condition, N upregulated

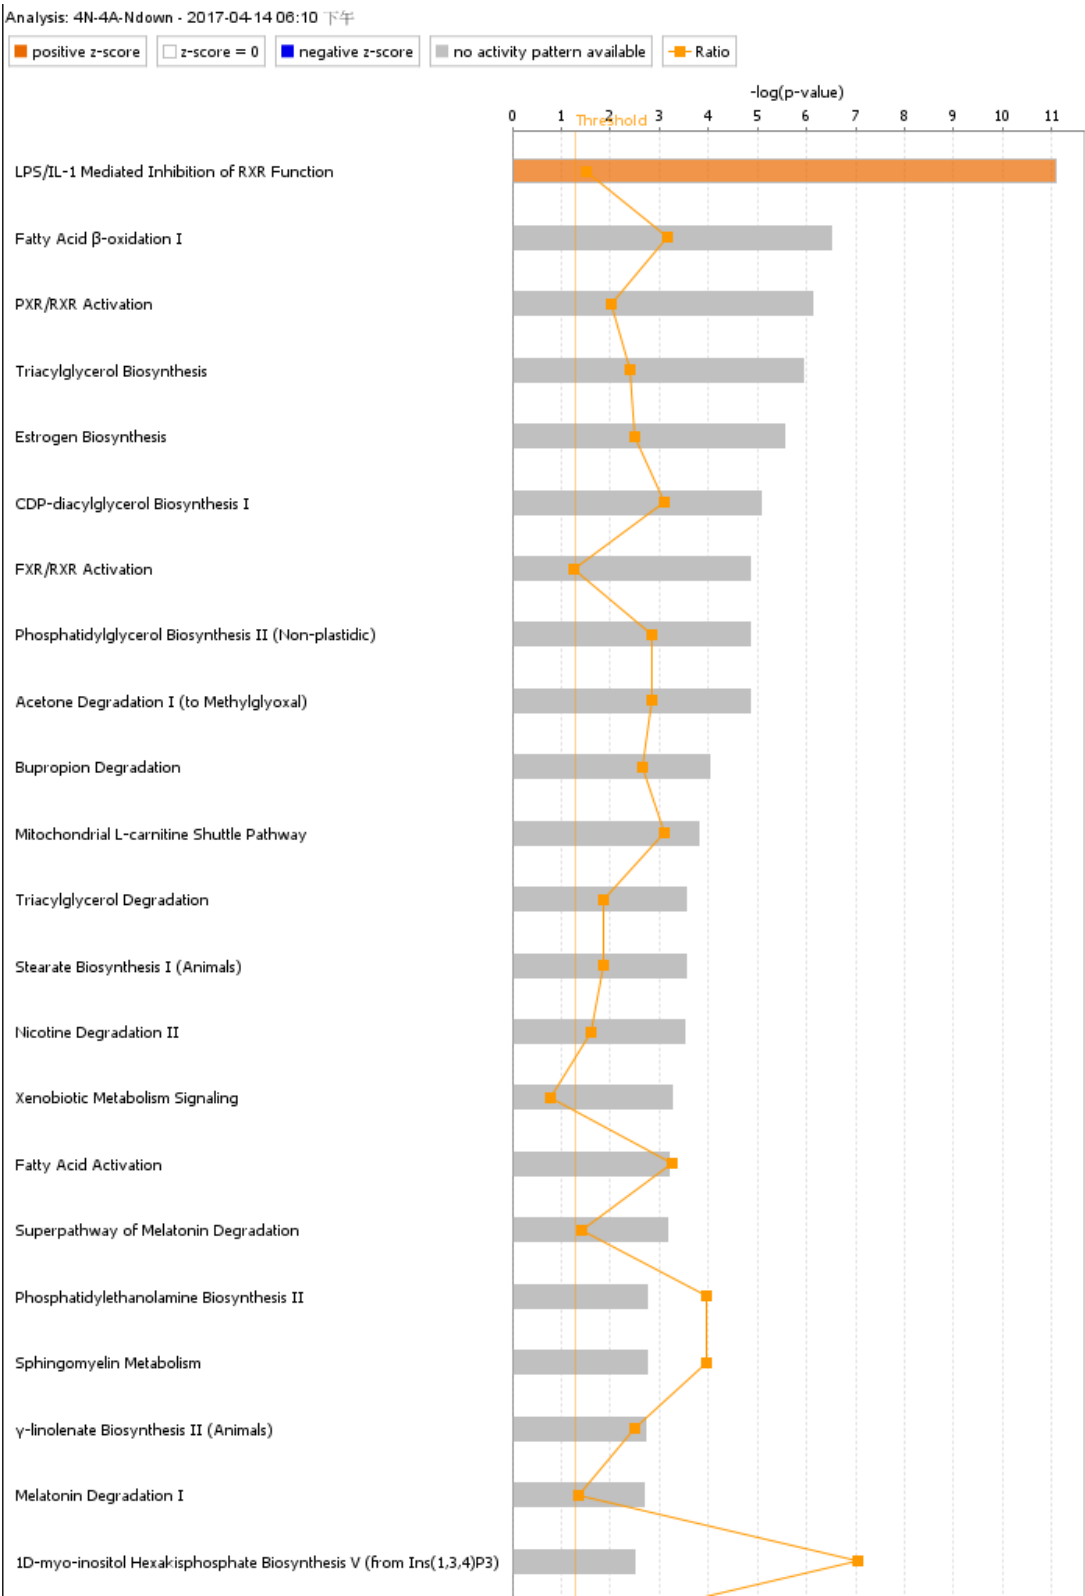

# S3D Stage specific canonical pathway

## week 12 N vs week 12 A condition, N upregulated

Analysis: 12N-12A N-up- 2017-04-14 06:11 下午

positive z-score   z-score = 0   negative z-score   no activity pattern available   Ratio

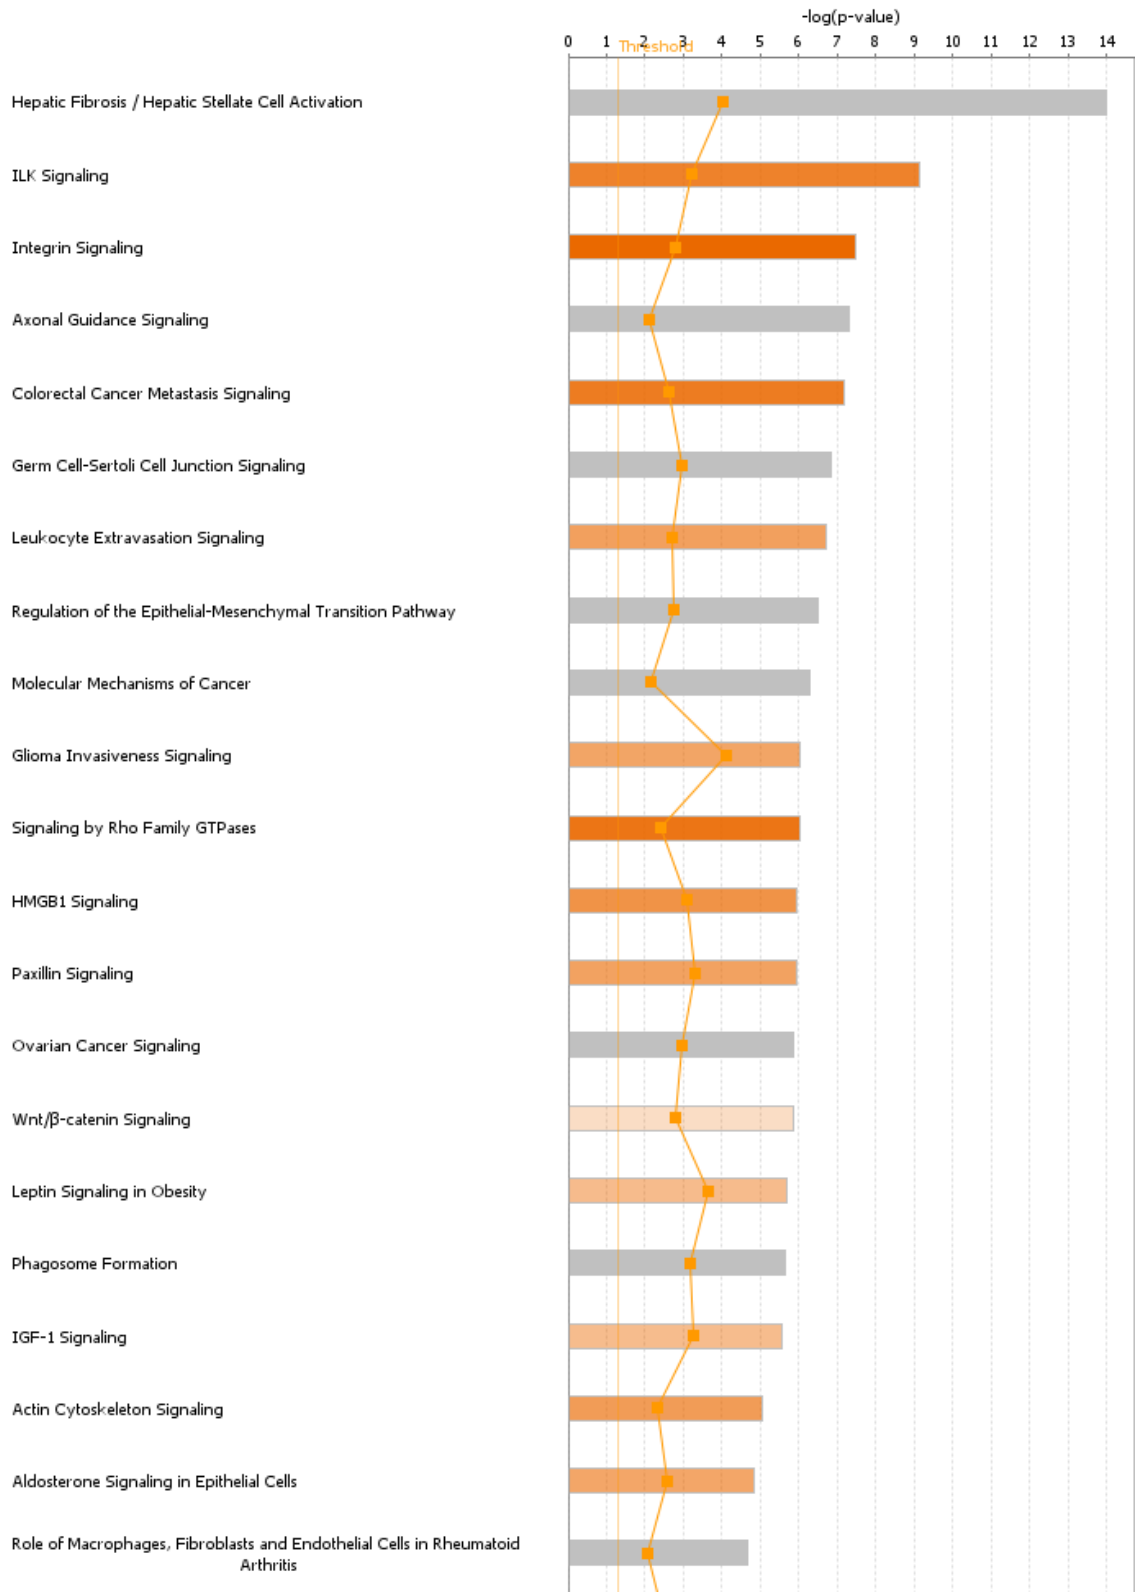

# S3E Stage specific canonical pathway

## week 12 N vs week 12 A condition, A upregulated

Analysis: 12N-12A-Ndown - 2017-04-14 06:11 下午

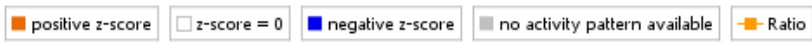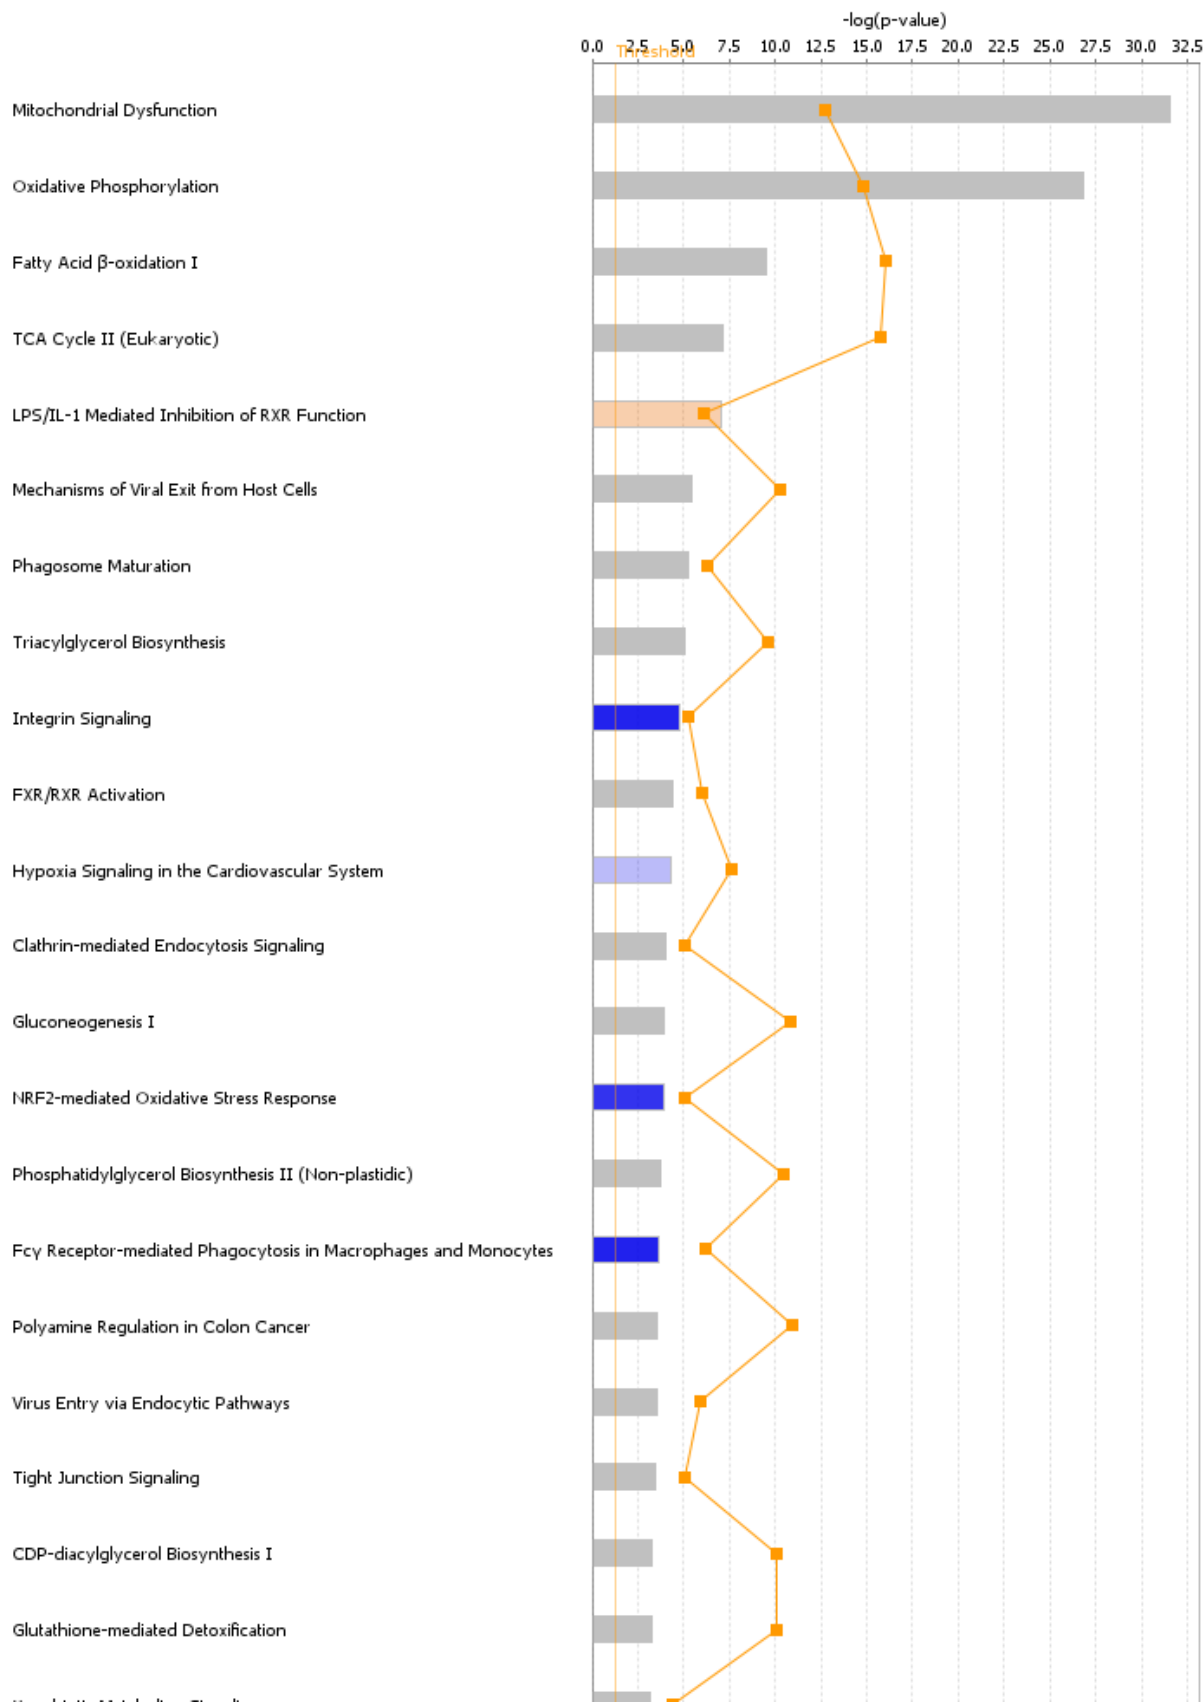

Supplement: f1 [file 4037865.f1.zip]
