# Supplementary material for: Identifying the Growth Factors for Improving Neointestinal Regeneration in Rats through Transcriptome Analysis Using RNA-Seq Data
Source: Biomed Res Int. 2018 Dec 13;2018:4037865. doi: 10.1155/2018/4037865 (PMC6311312; doi:10.1155/2018/4037865)
Supplement: Supplementary Materials — Suppl. Table 1: Gene Ontology analysis on week 1 “A” condition upregulated genes. Suppl. Table 2: Gene Ontology analysis on week 1 “N” condition upregulated genes. Suppl. Table 3: Oligonucleotide sequences for qPCR validation of gene expression. Suppl. Figure 1: Flowchart of this study. Suppl. Figure 2: Stage specific genomic analysis for week 1 “N” or week 1 “A” conditions. Suppl. Figure 3: Stage specific genomic analysis for 1-, 4-, and 12-week “N” vs. “A” conditions. Suppl. Dataset 1: A_stage_specific.xlsx. Suppl. Dataset 2: N_stage_specific.xlsx. Suppl. Dataset 3: NvsA.xlsx. Suppl. Dataset 4: GF_time_matrix.xlsx. [file 4037865.f1.zip]

Archive with 5 entries (5 files):
- S1_A_stage_specific.xlsx
- S2_N_stage_specific.xlsx
- S3_NvsA.xlsx
- S4_GF_time_matrix.xlsx
- Supplementary_Info.pdf
