# Supplementary material for: Identifying the Growth Factors for Improving Neointestinal Regeneration in Rats through Transcriptome Analysis Using RNA-Seq Data
Source: Biomed Res Int. 2018 Dec 13;2018:4037865. doi: 10.1155/2018/4037865 (PMC6311312; doi:10.1155/2018/4037865)
Supplement: Supplementary Materials — Suppl. Table 1: Gene Ontology analysis on week 1 “A” condition upregulated genes. Suppl. Table 2: Gene Ontology analysis on week 1 “N” condition upregulated genes. Suppl. Table 3: Oligonucleotide sequences for qPCR validation of gene expression. Suppl. Figure 1: Flowchart of this study. Suppl. Figure 2: Stage specific genomic analysis for week 1 “N” or week 1 “A” conditions. Suppl. Figure 3: Stage specific genomic analysis for 1-, 4-, and 12-week “N” vs. “A” conditions. Suppl. Dataset 1: A_stage_specific.xlsx. Suppl. Dataset 2: N_stage_specific.xlsx. Suppl. Dataset 3: NvsA.xlsx. Suppl. Dataset 4: GF_time_matrix.xlsx. [file 4037865.f1.zip › S1_A_stage_specific.xlsx]

## Sheet: Ctrl_vs_Aother
gene_id	Symbol	locus	length	C_0w_A	C_0w_B	A_1w_A	A_1w_B	A_4w_A	A_4w_B	A_12w_A	A_12w_B	baseMean	log2FoldChange	lfcSE	stat	pvalue	padj
ENSRNOG00000004222	S100G	chrX:33731724-33870223	410	4304.74	11040.2	394.236	437.817	878.3	656.989	544.726	1025.47	2408.28	2.91891	0.354271	8.2392	1.73e-16	2.57663e-12
ENSRNOG00000012034	CES2I	chr1:289903226-289910829	1889	301.045	347.526	85.8985	91.2601	106.347	115.102	132.215	130.821	163.914	1.46572	0.214348	6.83806	8.03e-12	3.97687e-08
ENSRNOG00000021245	RGD1311739	chr3:130168346-130201122	1285	768.996	839.337	382.056	339.626	409.123	421.611	393.472	471.238	503.679	0.967901	0.15275	6.33648	2.35e-10	8.73458e-07
ENSRNOG00000047669	CES2A	chr19:506189-507414	396	1120.22	1396.31	350.645	371.972	467.926	484.982	588.092	544.386	666.048	1.33359	0.223771	5.95962	2.53e-09	6.26282e-06
ENSRNOG00000013552	SCD1	chr1:271602886-271615702	4690	1085.4	704.36	160.899	83.1738	27.5251	133.208	51.8283	45.0138	287.591	2.45624	0.414118	5.93125	3.01e-09	6.38331e-06
ENSRNOG00000001164	TFF1	chr20:12071834-12075695	462	27.647	32.5806	1.9231	1.15519	0	2.58657	1.05772	4.22004	9.01568	2.42697	0.442255	5.48772	4.07e-08	6.05141e-05
ENSRNOG00000021402	ANKRD53	chr4:180005841-180042794	1714	47.1023	46.5436	3.8462	10.3967	6.2557	10.3463	4.23088	11.2535	17.4052	2.03948	0.383307	5.32074	1.03e-07	0.000109719
ENSRNOG00000011330	CES2A	chr19:59721-64825	1231	1531.85	996.034	388.466	518.681	404.118	372.466	599.727	578.146	674.347	1.29388	0.248772	5.20108	1.98e-07	0.000184051
ENSRNOG00000017244	RNF186	chr5:161156804-161158029	1225	4985.68	6246.16	2113.49	1800.94	1867.95	1448.48	1271.38	2934.34	2832.54	1.40445	0.273964	5.12641	2.95e-07	0.000258198
ENSRNOG00000032669	SERPINA1	chr6:136828868-136833261	1313	171.002	148.94	17.3079	33.5005	23.7717	18.106	7.40404	49.2338	58.6289	1.99429	0.402686	4.95247	7.33e-07	0.000473538
ENSRNOG00000046540	UGT2B	chr14:22165754-22351508	2622	22.5272	38.7864	0	0	0	0	1.05772	4.22004	8.36814	2.10864	0.437957	4.81473	1.47e-06	0.000782436
ENSRNOG00000048967	LOC688459	chr9:22278199-22282379	1306	966.621	1144.97	557.699	577.596	624.319	473.342	688.576	658.327	711.647	0.796467	0.166132	4.79419	1.63e-06	0.000809199
ENSRNOG00000020029	FAM195A	chr10:15043743-15048683	820	963.549	1176	498.724	408.938	555.506	382.812	537.322	658.327	647.45	1.01737	0.212632	4.78465	1.71e-06	0.00082123
ENSRNOG00000003807	WNT9B	chr10:91552384-91574275	4662	294.901	280.813	94.232	67.0011	92.5844	75.0105	72.9827	163.175	142.565	1.41663	0.300048	4.72135	2.34e-06	0.0010552
ENSRNOG00000011782	GOT2	chr19:9572756-9598443	2357	4405.09	4722.63	3073.12	3109.77	2903.9	2704.26	2621.03	3366.19	3366.45	0.610892	0.129369	4.72209	2.33e-06	0.0010552
ENSRNOG00000033266	PRSS30	chr10:13164167-13167857	1621	2491.3	2255.82	1020.53	914.911	1471.34	1068.25	1119.07	1481.24	1477.56	0.957248	0.206602	4.63329	3.6e-06	0.00152834
ENSRNOG00000012821	LECT1	chr15:65587062-65611651	1403	69.6295	96.1902	3.20517	4.62076	1.25114	6.46642	4.23088	22.5069	25.9909	2.05685	0.447839	4.59283	4.37e-06	0.00180538
ENSRNOG00000016691	NADK2	chr2:77550015-77592156	3134	1041.37	1090.67	414.108	392.765	481.689	470.756	493.955	724.441	638.859	1.03171	0.225684	4.57147	4.84e-06	0.00189433
ENSRNOG00000004181	SDCCAG8	chr13:99341228-99528213	2534	235.511	342.872	141.027	128.226	137.625	156.487	110.003	160.362	176.733	0.992804	0.218443	4.54492	5.5e-06	0.00204207
ENSRNOG00000019321	CCK	chr8:129312785-129319370	702	1294.29	2229.44	316.03	190.607	490.447	250.897	300.393	797.588	732.008	1.70512	0.378717	4.50236	6.72e-06	0.00237819
ENSRNOG00000006720	RNPEP	chr13:57144704-57163169	2363	4493.15	5641.09	2842.34	2803.65	3189.16	2181.77	2842.09	3381.66	3421.04	0.788632	0.175705	4.48838	7.18e-06	0.00248059
ENSRNOG00000050052	COX19	chr12:19381856-19391336	2648	1663.94	1956.38	1013.47	912.601	1152.3	998.416	1132.82	1305.4	1267.16	0.714972	0.160229	4.46219	8.11e-06	0.00274044
ENSRNOG00000014740	GAST	chr10:88038778-88041731	446	73.7253	127.219	17.3079	12.7071	18.7671	15.5194	25.3853	45.0138	41.9453	1.68694	0.379101	4.44984	8.59e-06	0.00283836
ENSRNOG00000046944	LOC100361933	chr1:281715744-281716143	399	12.2876	82.2271	8.33344	5.77596	3.75342	5.17314	5.2886	4.22004	15.7477	1.94336	0.441386	4.40285	1.07e-05	0.00330819
ENSRNOG00000032885	CYCS	chr18:61664137-61664455	318	71.6774	173.763	39.7441	30.035	48.7945	24.5724	32.7893	40.7938	57.9336	1.47562	0.335785	4.39455	1.11e-05	0.00336695
ENSRNOG00000002470	IFI47	chr10:34059638-34067269	1874	3437.44	2988.1	2230.16	2192.55	2243.29	2078.31	1946.21	2446.22	2447.82	0.543533	0.125812	4.32019	1.56e-05	0.00454332
ENSRNOG00000025809	RN50_5_1061.2	chr5:105651511-106019987	1131	21.5032	13.9631	0.641034	1.15519	0	0	3.17316	0	5.13828	1.87868	0.441502	4.25519	2.09e-05	0.00574899
ENSRNOG00000009508	CASP6	chr2:249516524-250013503	1447	2503.59	2469.92	873.088	1011.95	1045.95	931.165	797.521	1723.18	1419.25	1.11596	0.26221	4.25599	2.08e-05	0.00574899
ENSRNOG00000051171	G6PC	chr10:89034247-89109170	2423	2367.27	2612.65	324.322	1122.6	600.491	434.453	288.732	888.992	1079.89	1.588	0.378965	4.19036	2.79e-05	0.00739215
ENSRNOG00000012862	SPSB4	chr8:104287498-104359356	2774	357.363	434.407	195.515	209.09	232.712	151.314	222.121	260.236	257.62	0.85465	0.204795	4.17319	3e-05	0.00783217
ENSRNOG00000013118	ATOX1	chr10:40622327-40637386	512	7388.92	9982.06	2931.45	2626.9	3794.71	2852.99	3363.55	5820.85	4840.01	1.15429	0.277857	4.15426	3.26e-05	0.00836292
ENSRNOG00000010437	SNCG	chr16:9049950-9054488	706	842.722	870.366	387.825	202.158	215.196	412.558	226.352	410.751	447.173	1.27263	0.308015	4.13173	3.6e-05	0.00907017
ENSRNOG00000002378	BPNT1	chr13:107941116-107965559	1936	15062.5	19013.1	6194.31	5886.85	5733.98	3614.73	4838.01	10837.1	8886.34	1.27165	0.309613	4.10722	4e-05	0.00975718
ENSRNOG00000050038	ZP2	chr1:196394579-197295841	2138	938.974	798.999	450.647	410.093	564.264	276.763	471.743	417.784	541.097	0.94194	0.230802	4.08116	4.48e-05	0.0105718
ENSRNOG00000028241	ITFG3	chr10:15392901-15405995	2625	14077.4	17045.8	7162.91	6998.15	8542.79	4781.27	6944.99	10340.5	9475.94	0.983141	0.241715	4.06736	4.75e-05	0.0110424
ENSRNOG00000001251	GRIFIN	chr12:18164010-18165993	583	35.8387	46.5436	14.1027	6.93115	3.75342	7.75971	4.23088	14.0668	16.7723	1.65215	0.408498	4.04444	5.24e-05	0.0116975
ENSRNOG00000007883	TIMM10	chr3:78747541-78751013	1056	744.421	882.778	446.16	339.626	465.424	354.36	445.3	576.739	531.609	0.845661	0.209157	4.04318	5.27e-05	0.0116975
ENSRNOG00000024923	NNAT	chr3:161553361-161555777	1137	426.993	408.033	125.002	160.572	127.616	263.83	110.003	132.228	220.322	1.24528	0.309585	4.02242	5.76e-05	0.0121355
ENSRNOG00000002028	TMEM50B	chr11:35327976-35360982	2264	1444.81	1312.53	869.883	927.618	899.57	764.331	763.674	1060.64	1006.2	0.6283	0.156192	4.02261	5.76e-05	0.0121355
ENSRNOG00000010537	DIS3L	chr8:69480087-69516482	3204	1014.75	1146.53	775.01	776.288	758.191	633.709	735.116	820.095	833.035	0.517999	0.129511	3.99964	6.34e-05	0.0130957
ENSRNOG00000046864	ACOT4	chr6:118021371-118026536	2462	67.5816	54.3009	11.5386	20.7934	12.5114	11.6396	14.8081	32.3537	28.3719	1.4481	0.363208	3.98697	6.69e-05	0.0136255
ENSRNOG00000003872	LOC100911874	chr9:52560180-52578109	3236	1339.34	1610.41	436.544	507.129	427.89	460.409	463.281	1029.69	783.836	1.2277	0.30862	3.97804	6.95e-05	0.0137703
ENSRNOG00000017712	CARTPT	chr2:49285117-49287138	840	113.66	179.969	70.5137	48.518	47.5433	67.2508	76.1559	71.7407	84.7615	1.08055	0.272071	3.97156	7.14e-05	0.0139641
ENSRNOG00000028121	OTOP2	chr10:104412059-104421630	2100	45.0544	100.845	7.05137	3.46557	7.50684	3.87985	2.11544	26.7269	24.5596	1.75916	0.448427	3.92295	8.75e-05	0.0163101
ENSRNOG00000015519	CES1D	chr19:26294246-26337106	1937	719.846	985.174	269.234	125.916	88.831	162.954	186.159	441.698	372.489	1.52757	0.390445	3.91238	9.14e-05	0.0165651
ENSRNOG00000001295	S100B	chr20:15287747-15296457	1484	393.202	442.165	188.464	65.8459	56.3013	165.54	57.1169	112.535	185.856	1.49204	0.387111	3.85429	0.000116068	0.0200595
ENSRNOG00000038571	FZD8	chr17:64035883-64038868	2985	110.588	153.594	48.7186	58.9147	66.3104	72.4239	57.1169	81.5875	81.3125	0.959074	0.249566	3.84297	0.000121555	0.0205304
ENSRNOG00000003985	TMEM19	chr7:58325485-58352039	1817	1253.33	1349.77	808.985	788.996	988.401	792.783	813.387	1029.69	978.315	0.566641	0.147937	3.83028	0.000127997	0.0211381
ENSRNOG00000012110	COL17A1	chr1:274850655-274896696	5433	388.082	335.114	103.847	75.0874	208.94	156.487	133.273	173.022	196.633	1.17343	0.309836	3.78726	0.000152319	0.0231275
ENSRNOG00000033615	ND3	chrM:9450-9798	348	81970.3	106479	49916.7	49854.6	62454.4	53397.1	52612.1	72517.2	66151.5	0.700113	0.185119	3.78195	0.000155604	0.0231275

## Sheet: 1A_vs_Aother
gene_id	Symbol	locus	length	C_0w_A	C_0w_B	A_1w_A	A_1w_B	A_4w_A	A_4w_B	A_12w_A	A_12w_B	baseMean	log2FoldChange	lfcSE	stat	pvalue	padj
ENSRNOG00000020560	DMBT1	chr1:208708958-208723007	1779	2167.73	1731.42	8672.55	13977.8	1104.76	1862.33	1050.32	1586.74	4043.6	2.34567	0.273208	8.58566	9.0313e-18	1.29409e-13
ENSRNOG00000031173	SND1	chr4:55519817-55919017	3458	2562.98	2671.61	3603.89	3954.22	2696.21	2472.76	2468.72	2515.15	2873.93	0.563	0.0899873	6.25644	3.93865e-10	6.27077e-07
ENSRNOG00000034038	AABR06008998.1	chr1:210213114-210242660	1416	5116.74	7443.88	18929.1	23013.7	2466	4190.24	2563.91	4232.7	8539.44	1.73565	0.30547	5.68189	1.33213e-08	1.19301e-05
ENSRNOG00000007546	ASNS	chr4:33608631-33626579	2218	335.86	491.811	853.857	966.895	439.15	342.72	497.128	440.291	547.109	1.03083	0.186786	5.51874	3.41443e-08	2.71808e-05
ENSRNOG00000006579	REG3G	chr4:174231309-174233865	773	4857.68	48970.1	576432	168658	7864.67	47142.8	34151.7	20159.1	114540	1.87152	0.347451	5.38644	7.18672e-08	5.41993e-05
ENSRNOG00000006151	REG3B	chr4:174173098-174176337	781	23298.2	72710.5	508787	174999	34617.8	71659.6	81643.3	61168.1	129475	1.73488	0.33504	5.17813	2.24116e-07	0.000145971
ENSRNOG00000019582	MTHFD1L	chr1:41876362-42065388	3522	144.379	183.072	303.85	279.556	173.909	153.901	149.139	139.261	191.368	0.852211	0.167574	5.08559	3.66491e-07	0.000228324
ENSRNOG00000010833	MTHFD2	chr4:179592813-179604331	2061	235.511	217.204	511.545	560.268	246.475	316.855	301.45	236.322	329.457	0.972694	0.194107	5.01111	5.41162e-07	0.000298243
ENSRNOG00000036839	HNRNPA1	chr7:142647375-142652966	1256	2387.88	2282.19	3204.53	4062.81	2258.31	2417.15	2319.58	2266.16	2656.81	0.635395	0.128359	4.95016	7.41536e-07	0.000393536
ENSRNOG00000012543	MCM3	chr9:25770287-25788415	2918	494.574	591.104	1159.63	799.392	520.474	512.141	561.649	483.898	642.251	0.846225	0.175377	4.82517	1.39882e-06	0.000668124
ENSRNOG00000010721	DLGAP5	chr15:28108227-28138753	2737	300.021	358.386	496.16	627.269	279.004	312.975	321.547	351.67	381.823	0.774092	0.162949	4.75052	2.02894e-06	0.000937829
ENSRNOG00000007906	BUB1B	chr3:116912840-116964033	3159	178.17	144.285	260.26	377.747	181.415	138.381	168.178	161.768	201.523	0.911145	0.193507	4.7086	2.49429e-06	0.00111689
ENSRNOG00000014336	MCM5	chr19:25637491-25681915	2529	318.452	316.497	619.88	613.406	361.58	249.604	396.645	267.269	393.69	0.89052	0.191082	4.66042	3.15572e-06	0.00137025
ENSRNOG00000023272	RRM2	chr6:60756210-60761048	1173	66.5576	58.9553	143.592	359.264	68.8127	72.4239	108.945	68.9274	118.952	1.37637	0.296318	4.64489	3.40253e-06	0.00140483
ENSRNOG00000020440	FADS2	chr1:232857119-233097150	1335	134.139	124.116	257.696	393.92	170.155	109.929	174.524	116.755	185.656	1.09212	0.235212	4.64315	3.43143e-06	0.00140483
ENSRNOG00000031916	TIMELESS	chr7:2622163-2646197	4215	178.17	158.248	319.235	360.42	207.689	215.979	195.678	189.902	228.787	0.789064	0.17074	4.62145	3.81075e-06	0.00147579
ENSRNOG00000051158	C2	chr20:6616010-6641139	2554	227.319	848.646	4663.52	867.548	250.228	242.56	534.149	229.289	989.44	1.60831	0.349342	4.60383	4.14798e-06	0.00148591
ENSRNOG00000000925	PSPH	chr12:32455766-32468317	1140	224.248	240.475	374.364	432.041	252.73	175.887	255.968	226.476	273.017	0.778213	0.16894	4.60645	4.09603e-06	0.00148591
ENSRNOG00000016042	ALDH1A2	chr8:75363284-75442554	2244	204.793	166.006	372.441	374.282	232.712	225.032	192.505	165.988	242.535	0.855422	0.186272	4.59234	4.38309e-06	0.00152922
ENSRNOG00000011777	SPAG5	chr10:66053385-66071009	3865	231.416	328.908	450.006	518.681	266.493	234.084	287.7	237.729	320.108	0.825131	0.179859	4.58766	4.48234e-06	0.00152922
ENSRNOG00000047287	NUCKS1	chr13:53753076-53778581	1709	829.41	848.646	1148.73	1222.19	816.995	765.624	921.274	849.636	927.083	0.500063	0.109271	4.57635	4.73157e-06	0.00157671
ENSRNOG00000050504	NOL11	chr10:95128387-95146244	2032	91.1327	89.9844	176.284	248.366	98.8401	106.049	125.869	104.094	130.39	0.954433	0.209568	4.55429	5.25627e-06	0.00167371
ENSRNOG00000025407	KIF15	chr8:131187616-131258348	4214	138.235	116.359	221.157	276.091	121.361	104.756	154.427	143.481	159.577	0.874624	0.19455	4.49563	6.93629e-06	0.00207063
ENSRNOG00000011332	CLSPN	chr5:148352776-148387685	5052	105.468	125.668	204.49	191.762	112.603	113.809	123.753	104.094	135.624	0.755796	0.168497	4.48551	7.27393e-06	0.00208456
ENSRNOG00000013774	LMNB1	chr18:50979874-51017524	2135	287.734	217.204	435.903	631.89	261.488	275.47	317.316	232.102	333.351	0.924424	0.207038	4.465	8.00673e-06	0.00220631
ENSRNOG00000007130	ENDOU	chr7:139393948-139414672	1236	4.09585	7.75727	17.3079	42.7421	2.50228	2.58657	3.17316	4.22004	10.6756	1.55416	0.349557	4.44608	8.74498e-06	0.0023205
ENSRNOG00000000821	TUBB5	chr20:5519550-5523476	2171	6236.96	7844.16	13045	12788	7081.45	9091.79	7126.92	6465.11	8743	0.774978	0.177613	4.36329	1.28122e-05	0.00322081
ENSRNOG00000016316	MCM2	chr4:186066379-186080792	3261	673.768	749.353	1267.32	1014.26	708.145	525.074	715.019	593.62	782.234	0.750859	0.171952	4.36668	1.26151e-05	0.00322081
ENSRNOG00000003171	MPZ	chr13:94151843-94157570	1851	3.07189	10.8602	92.3089	13.8623	5.00456	3.87985	1.05772	1.40668	16.5045	1.44694	0.334012	4.33201	1.47751e-05	0.00352854
ENSRNOG00000042317	CD209F	chr12:4811688-4814469	771	0	1.55145	32.6927	9.24153	0	0	0	0	5.54917	1.23428	0.286876	4.3025	1.68885e-05	0.00390315
ENSRNOG00000006327	RCC2	chr5:162927686-162941028	1284	316.405	279.262	472.442	760.116	367.835	318.148	347.99	296.81	395.708	0.867267	0.201462	4.30486	1.67093e-05	0.00390315
ENSRNOG00000028292	GART	chr11:35389225-35414461	3395	583.659	608.17	764.112	806.323	596.794	569.045	583.862	582.366	637.952	0.423089	0.0985154	4.29464	1.74974e-05	0.0039175
ENSRNOG00000043370	FUBP1	chr2:276102475-276125397	2346	936.926	853.3	1272.45	1278.8	877.049	942.804	972.045	901.683	1006.86	0.480204	0.112258	4.27767	1.8886e-05	0.00410026
ENSRNOG00000011025	TRMT10A	chr2:261963879-261977434	1641	123.9	147.388	227.567	254.142	142.63	161.661	135.388	149.108	168.225	0.715571	0.168044	4.25823	2.06052e-05	0.00434194
ENSRNOG00000011654	PLK4	chr2:147290038-147308583	3417	141.307	131.874	267.952	227.573	135.123	162.954	158.658	137.855	171.083	0.736869	0.175231	4.20512	2.60948e-05	0.00519322
ENSRNOG00000024008	CDC25C	chr18:27243053-27263496	2068	30.7189	37.2349	69.8727	113.209	40.0365	40.0918	45.482	40.7938	52.2758	1.0544	0.253363	4.1616	3.16027e-05	0.00595836
ENSRNOG00000001005	FCER2	chr12:4395822-4407330	1995	13.3115	15.5145	167.31	17.3279	10.0091	11.6396	20.0967	9.84677	33.3601	1.45256	0.349529	4.15577	3.24194e-05	0.00603295
ENSRNOG00000010332	NIPSNAP3B	chr5:73997163-74012019	1170	701.415	716.772	965.397	978.447	601.798	572.925	548.957	649.887	718.342	0.605103	0.145947	4.14605	3.38266e-05	0.00621412
ENSRNOG00000025891	AABR06092080.1	chr17:57161810-57162923	1113	76.7972	80.6756	126.925	177.899	77.5707	86.6501	87.7908	75.9608	99.3087	0.837734	0.202439	4.1382	3.50041e-05	0.00634904
ENSRNOG00000015810	TRIP13	chr1:33392426-33437364	1794	56.318	52.7495	87.8216	123.605	45.0411	49.1448	57.1169	45.0138	64.8373	0.943719	0.228835	4.12402	3.72311e-05	0.00666856
ENSRNOG00000003908	RN50_6_1241.2	chr6:124275259-124412314	2169	129.019	152.043	240.388	227.573	127.616	126.742	166.062	135.041	163.522	0.710347	0.172834	4.10998	3.95688e-05	0.00691036
ENSRNOG00000008252	SPINK4	chr5:61770344-61781920	228	101.372	192.38	380.774	822.496	67.5616	64.6642	138.561	260.236	254.084	1.39088	0.339249	4.09989	4.13338e-05	0.00698386
ENSRNOG00000034230	FCRL1	chr2:206111317-206129916	1540	22.5272	21.7204	355.774	8.08634	18.7671	19.3993	5.2886	16.8802	59.0879	1.36633	0.334669	4.08262	4.45304e-05	0.00709329
ENSRNOG00000019190	ANKRD22	chr1:259654477-259685074	714	15.3594	17.066	36.5389	75.0874	13.7625	16.8127	22.2121	21.1002	27.3457	1.2548	0.307611	4.07918	4.5195e-05	0.00709329
ENSRNOG00000032404	TOP2A	chr10:86699276-86735462	4984	695.271	541.458	1076.94	1397.78	663.104	483.688	844.061	603.466	789.688	0.870302	0.213291	4.08035	4.49671e-05	0.00709329
ENSRNOG00000013148	RAD54L	chr5:138711341-138762035	2794	75.7733	93.0873	144.233	147.864	92.5844	71.1306	87.7908	84.4009	99.7886	0.749642	0.183275	4.09026	4.30885e-05	0.00709329
ENSRNOG00000039859	DNMT1	chr8:21978829-22024656	5284	595.946	653.162	932.063	989.999	653.095	566.459	710.788	519.065	704.054	0.621578	0.152316	4.08084	4.4874e-05	0.00709329
ENSRNOG00000001833	MCM4	chr11:92565513-92579215	3339	531.437	643.854	1024.37	844.445	589.287	618.19	648.382	526.099	679.921	0.633632	0.156445	4.0502	5.11736e-05	0.0076382
ENSRNOG00000009106	C2CD4B	chr8:77923035-77924058	1023	14.3355	23.2718	50.6417	85.4841	18.7671	18.106	33.847	23.9136	33.6023	1.23137	0.307014	4.01079	6.05166e-05	0.00867142
ENSRNOG00000024428	KIF20A	chr18:27137684-27165911	2921	401.393	491.811	676.932	761.271	472.931	327.201	461.166	360.11	494.79	0.735367	0.183476	4.00797	6.12433e-05	0.00868866

## Sheet: 4A_vs_Aother
gene_id	Symbol	locus	length	C_0w_A	C_0w_B	A_1w_A	A_1w_B	A_4w_A	A_4w_B	A_12w_A	A_12w_B	baseMean	log2FoldChange	lfcSE	stat	pvalue	padj
ENSRNOG00000046710	PCDHA8	chr18:29696539-29924444	5248	0.0171037	0.0208576	0.00602619	0.0100791	45.1566	49.2444	0.00983769	0.0171111	11.838	2.73793	0.343962	7.95997	1.72082e-15	2.50035e-11
ENSRNOG00000031540	LOC100362384	chr13:93865779-93866690	911	2263.98	1965.69	2285.93	2371.61	4028.67	3929	2275.16	2795.08	2744.13	0.749461	0.143048	5.23923	1.61247e-07	0.000780974
ENSRNOG00000042878	WDR74	chr1:231871408-231876109	1147	340.98	392.518	346.799	331.54	603.05	1017.81	363.856	301.03	465.295	1.1115	0.21854	5.086	3.65695e-07	0.00122983
ENSRNOG00000004662	RGD1560687	chr7:15550504-15551413	909	357.363	328.908	364.748	286.487	698.136	552.232	316.258	400.904	413.261	0.822188	0.164647	4.99365	5.92487e-07	0.00122983
ENSRNOG00000029082	RGD1566189	chr1:183063224-183064130	906	772.068	605.067	661.547	755.495	1343.72	1160.08	686.46	836.975	853.589	0.765568	0.152381	5.02404	5.05957e-07	0.00122983
ENSRNOG00000012094	LTBP2	chr6:116956932-117049306	6452	772.068	771.073	775.01	760.116	1627.73	2397.75	983.68	1150.67	1159.96	1.09339	0.222315	4.91822	8.73347e-07	0.00140997
ENSRNOG00000030187	MMP12	chr8:5610391-5620293	1790	106.492	68.264	82.6934	247.211	87.5798	2959.03	56.0592	109.721	477.95	1.629	0.338214	4.81647	1.46117e-06	0.00212307
ENSRNOG00000020938	PPP1R15A	chr1:102590678-102593734	2009	637.929	777.279	636.547	555.647	1131.03	1215.69	756.27	701.934	803.506	0.758348	0.160994	4.7104	2.47233e-06	0.00299358
ENSRNOG00000011750	FAM180A	chr4:62567993-62583301	1573	22.5272	18.6175	31.4107	58.9147	35.0319	1038.51	23.2698	99.8744	170.606	1.49597	0.333791	4.48175	7.40345e-06	0.00827478
ENSRNOG00000030210	FNDC1	chr1:48905801-48987223	5340	158.714	79.1242	218.593	180.21	152.639	2276.18	101.541	192.715	430.084	1.55011	0.348572	4.44704	8.70628e-06	0.00903587
ENSRNOG00000018570	C1QTNF3	chr2:83741941-83764184	1920	136.187	82.2271	139.745	255.297	236.466	2827.12	333.182	279.93	548.094	1.491	0.348081	4.2835	1.83974e-05	0.0167071
ENSRNOG00000006664	CDKN2A	chr5:111793601-111801220	490	2.04793	0	0.641034	2.31038	1.25114	107.343	1.05772	4.22004	15.2297	1.22664	0.290479	4.22283	2.41252e-05	0.0194744
ENSRNOG00000026293	JUN	chr5:117958960-117959965	1005	590.827	482.502	579.495	492.111	957.122	825.116	442.127	613.313	623.497	0.702084	0.166001	4.2294	2.34314e-05	0.0194744
ENSRNOG00000005787	ERP27	chr4:235150710-235169448	1005	18.4313	9.30873	15.3848	4.62076	33.7808	87.9433	13.7504	16.8802	25.2903	1.39862	0.343022	4.07734	4.55536e-05	0.0348365
ENSRNOG00000010331	CTSB	chr15:50081534-50102406	1942	17542.5	20496.3	20968.2	20126.9	28652.4	42118.4	22057.7	23010.5	24469.3	0.731863	0.185044	3.95507	7.65123e-05	0.0483358

## Sheet: 12A_vs_Aother
gene_id	Symbol	locus	length	C_0w_A	C_0w_B	A_1w_A	A_1w_B	A_4w_A	A_4w_B	A_12w_A	A_12w_B	baseMean	log2FoldChange	lfcSE	stat	pvalue	padj
ENSRNOG00000047836	RGD1565617	chr3:24585555-24586167	375	3.07189	17.066	15.3848	10.3967	10.0091	2.58657	322.605	213.816	73.8717	2.62909	0.282196	9.31654	1.2e-20	2.16e-16
ENSRNOG00000031607	RT1-CE3	chr20:7008108-7019717	1038	7.16774	4.65436	1.9231	11.5519	5.00456	2.58657	870.504	7.03341	114.107	1.37493	0.232012	5.9261	3.1e-09	1.86e-05
ENSRNOG00000049909	AABR06022404.1	chr3:22434684-22435309	387	327.668	263.747	275.003	95.8809	781.963	126.742	2648.53	1426.37	738.832	1.26318	0.278819	4.53045	5.89e-06	0.0176582
ENSRNOG00000046988	AABR06046559.1	chr6:149229360-149229690	330	4.09585	3.10291	5.7693	6.93115	51.2968	2.58657	106.83	284.15	57.2811	1.09348	0.24014	4.55351	5.28e-06	0.0176582
ENSRNOG00000048070	AABR06022402.1	chr3:22403205-22403816	408	190.457	139.631	150.643	16.1727	223.954	174.593	409.338	1740.06	376.608	1.16579	0.272141	4.28377	1.84e-05	0.0330776
ENSRNOG00000032317	AABR06065629.1	chr10:90308856-90309221	365	1.02396	1.55145	1.28207	1.15519	0	0	78.2713	1.40668	10.5095	0.834647	0.200236	4.16832	3.07e-05	0.0460315
