# Supplementary material for: Identifying the Growth Factors for Improving Neointestinal Regeneration in Rats through Transcriptome Analysis Using RNA-Seq Data
Source: Biomed Res Int. 2018 Dec 13;2018:4037865. doi: 10.1155/2018/4037865 (PMC6311312; doi:10.1155/2018/4037865)
Supplement: Supplementary Materials — Suppl. Table 1: Gene Ontology analysis on week 1 “A” condition upregulated genes. Suppl. Table 2: Gene Ontology analysis on week 1 “N” condition upregulated genes. Suppl. Table 3: Oligonucleotide sequences for qPCR validation of gene expression. Suppl. Figure 1: Flowchart of this study. Suppl. Figure 2: Stage specific genomic analysis for week 1 “N” or week 1 “A” conditions. Suppl. Figure 3: Stage specific genomic analysis for 1-, 4-, and 12-week “N” vs. “A” conditions. Suppl. Dataset 1: A_stage_specific.xlsx. Suppl. Dataset 2: N_stage_specific.xlsx. Suppl. Dataset 3: NvsA.xlsx. Suppl. Dataset 4: GF_time_matrix.xlsx. [file 4037865.f1.zip › S2_N_stage_specific.xlsx]

## Sheet: Ctrl_vs_Nother
gene_id	Symbol	locus	length	A-0_0	B-0_0	A-1N_0	B-1N_0	A-4N_0	B-4N_0	A-12N_0	B-12N_0	baseMean	log2FoldChange	lfcSE	stat	pvalue	padj
ENSRNOG00000019500	CYP1A1	chr8:62249045-62255076	2616	1306.58	2186	6.2938	2.44887	5.56689	3.38532	3.93495	8.42434	442.782	8.05567	0.434137	18.5556	7.34894e-77	1.19163e-72
ENSRNOG00000013241	CYP2C13	chr1:265578797-265590441	843	340.98	280.813	1.25876	3.6733	4.87103	2.25688	2.6233	2.5273	80.4768	6.35456	0.426801	14.8888	3.89738e-50	3.1598e-46
ENSRNOG00000019375	AKP3	chr9:93954154-93957145	1682	5917.48	3852.26	8.81132	7.34661	2.08758	11.2844	25.5772	10.9516	1237.29	8.00878	0.575115	13.9255	4.43161e-44	2.39528e-40
ENSRNOG00000032908	ACAA1A	chr8:127234653-127242997	1367	2269.1	2775.55	672.807	738.334	723.696	674.807	727.967	787.676	1172.96	1.81252	0.134642	13.4618	2.62477e-41	1.06402e-37
ENSRNOG00000010887	RGD1309534	chr8:13778079-13800657	2419	1424.33	1456.82	434.272	416.308	412.646	457.018	500.395	388.362	686.984	1.73479	0.136152	12.7416	3.47106e-37	1.12566e-33
ENSRNOG00000032917	ZFAND2A	chr12:19239056-19250441	3194	1587.14	1827.61	611.757	587.728	558.777	552.936	565.322	639.408	867.279	1.55067	0.125673	12.339	5.58563e-35	1.50952e-31
ENSRNOG00000016815	TMEM135	chr1:159198115-159407174	3395	2232.24	2161.18	507.91	587.728	514.241	629.67	701.734	563.589	988.95	1.91064	0.168064	11.3685	5.99772e-30	1.38933e-26
ENSRNOG00000010370	TNIP1	chr10:40028043-40075239	2871	9374.38	10656.9	3496.83	4267.15	3418.77	3348.08	3790.02	3604.78	5247.11	1.46289	0.134315	10.8915	1.26573e-27	2.28042e-24
ENSRNOG00000003515	EPHX1	chr13:104268707-104343633	1733	20878.6	20747.6	362.523	516.711	928.279	1090.07	1026.37	881.186	5834.21	4.49153	0.415614	10.807	3.18989e-27	5.1724e-24
ENSRNOG00000010940	ACAD11	chr8:111982415-112062756	3459	2385.83	3337.18	363.152	590.177	522.592	481.844	563.354	464.181	1090.82	2.50228	0.233958	10.6954	1.06956e-26	1.57663e-23
ENSRNOG00000051171	G6PC	chr10:89034247-89109170	2423	2367.27	2612.65	44.686	156.728	112.012	67.7064	80.5589	121.27	698.856	4.46904	0.419224	10.6602	1.56178e-26	2.11035e-23
ENSRNOG00000010224	RAB30	chr1:163889801-163905429	3087	1803.2	2347.35	140.981	219.174	302.7	224.56	274.791	227.457	694.753	3.10438	0.293094	10.5918	3.25364e-26	4.05829e-23
ENSRNOG00000010291	SLC46A1	chr10:65901909-65909255	2787	6241.05	7190.99	411.614	963.63	567.823	464.917	667.631	603.183	2146.34	3.37138	0.323977	10.4062	2.32227e-25	2.68969e-22
ENSRNOG00000016369	ECI2	chr17:32456607-32473003	1573	2413.48	2106.88	872.95	926.897	906.707	850.844	1041.45	972.169	1261.99	1.29251	0.130557	9.89999	4.16308e-23	4.50029e-20
ENSRNOG00000018740	UGT1A3	chr9:94910376-94990037	2243	44185	46521.9	4510.77	6212.78	6113.14	7675.65	8248.98	8428.55	16538.9	2.68303	0.271258	9.89106	4.55172e-23	4.61288e-20
ENSRNOG00000030591	ARF1	chr10:45318170-45334628	1756	21688.6	22314.6	12162.8	12958.2	11910.4	12379	13134.2	13165.6	14959.5	0.815367	0.0831491	9.80609	1.05991e-22	1.01097e-19
ENSRNOG00000003330	ACSF2	chr10:82104325-82146073	3083	5085	6461.81	938.405	1459.53	1198.27	848.587	914.877	879.501	2227.43	2.44456	0.25926	9.42896	4.14161e-21	3.35781e-18
ENSRNOG00000020743	CYP2S1	chr1:83854676-83868967	2632	2202.54	2820.54	241.682	488.549	226.851	255.027	289.875	270.421	852.056	3.01696	0.322188	9.36396	7.6801e-21	5.93014e-18
ENSRNOG00000020288	SLC25A20	chr8:116800145-116821558	1754	4677.46	5344.76	1440.02	1987.26	1798.8	1756.98	1723.51	1940.97	2585.54	1.5021	0.160626	9.35152	8.6395e-21	6.36771e-18
ENSRNOG00000018319	PISD	chr14:83999011-84034630	2040	2468.77	2460.61	838.963	1057.91	946.371	951.275	1106.38	1056.41	1361.32	1.32012	0.14238	9.27182	1.8299e-20	1.29008e-17
ENSRNOG00000018450	LOC100911440	chr1:220890717-220898559	2245	2387.88	2865.54	534.973	836.289	626.971	657.881	727.311	771.67	1177.72	1.91632	0.207077	9.25415	2.15939e-20	1.45893e-17
ENSRNOG00000009552	SERINC3	chr3:166209488-166228921	2143	6245.15	6177.89	3194.1	3280.26	3303.25	3578.28	3637.87	3403.43	4101.83	0.882193	0.095857	9.20322	3.47381e-20	2.25311e-17
ENSRNOG00000033209	BMP8B	chr5:144594117-144611108	1200	95.2286	100.845	3.1469	7.34661	2.78344	3.38532	1.96748	8.42434	27.8881	4.22897	0.470262	8.99281	2.40998e-19	1.39564e-16
ENSRNOG00000000975	MCOLN1	chr12:4216867-4230870	2070	2139.06	2665.4	584.694	816.698	723.696	556.321	600.081	540	1079.22	1.9078	0.212594	8.97391	2.86165e-19	1.60006e-16
ENSRNOG00000016346	PRKCD	chr16:6588978-6608725	2716	3450.76	4112.91	1414.85	1671.35	1362.5	1536.94	1610.71	1686.55	2106.88	1.29638	0.148359	8.73813	2.37e-18	1.28099e-15
ENSRNOG00000048874	GCKR	chr6:36175966-36205241	2273	113.66	116.359	8.81132	8.57104	20.18	7.89908	10.4932	10.9516	37.2598	3.2501	0.372402	8.72739	2.60628e-18	1.36325e-15
ENSRNOG00000019994	PHLDB3	chr1:82733954-82750033	1929	720.87	843.991	203.919	275.498	246.335	205.376	216.422	280.531	374.402	1.71502	0.196822	8.7136	2.94382e-18	1.49169e-15
ENSRNOG00000018749	BEST4	chr5:139806968-139810629	1365	274.422	338.217	16.3639	37.9575	12.5255	24.8257	34.1029	30.3276	96.3643	3.41995	0.393676	8.68722	3.71415e-18	1.80521e-15
ENSRNOG00000014876	LPIN2	chr9:118970172-119045052	5794	3401.61	4389.07	1006.38	1372.59	1075.11	1131.83	1143.1	852.543	1798.14	1.82243	0.209878	8.68327	3.84562e-18	1.80521e-15
ENSRNOG00000012508	SLC39A8	chr2:259585228-259647901	3071	1731.52	1687.98	810.012	784.862	758.489	741.385	926.026	737.972	1022.32	1.11869	0.129792	8.61911	6.74739e-18	3.03914e-15
ENSRNOG00000009845	ACADM	chr2:278788484-278812656	1953	8170.2	11024.6	1362.61	2377.85	1850.29	2040.22	2265.88	2300.69	3931.54	2.21368	0.257065	8.61136	7.2199e-18	3.16407e-15
ENSRNOG00000011815	SGK1	chr1:25652754-25660738	2439	9525.93	8585.75	2439.48	3114.96	2681.85	1785.19	2300.64	2236.66	4088.13	1.89155	0.22073	8.56954	1.03897e-17	4.3197e-15
ENSRNOG00000011320	IGFBPL1	chr5:65911663-65927068	1328	98.3004	93.0873	3.77628	8.57104	8.35033	5.6422	14.4282	7.58191	30.1134	3.40478	0.399793	8.51634	1.64668e-17	6.67523e-15
ENSRNOG00000008432	SLC22A5	chr10:38982887-39009871	3017	2856.86	2957.07	230.353	498.345	322.184	432.193	471.539	522.309	1039.42	2.74933	0.325849	8.43745	3.24344e-17	1.22308e-14
ENSRNOG00000009629	CAR2	chr2:107871642-107886834	1522	3174.29	3509.39	737.004	1023.63	797.457	515.697	735.836	786.834	1411.99	2.10515	0.249431	8.43981	3.17866e-17	1.22308e-14
ENSRNOG00000013552	SCD1	chr1:271602886-271615702	4690	1085.4	704.36	56.0148	97.9547	107.163	145.569	105.588	122.153	304.178	2.98738	0.354271	8.43249	3.38375e-17	1.24699e-14
ENSRNOG00000017202	MYZAP	chr8:74980450-75067085	2189	1001.44	1019.31	457.559	520.385	448.83	462.66	391.528	421.217	590.423	1.17384	0.139573	8.41023	4.09195e-17	1.47447e-14
ENSRNOG00000034078	MXI1	chr1:281444196-281503729	2278	2007.99	1957.94	994.42	1209.74	1028.48	997.541	1032.93	1021.03	1280.69	0.933318	0.112561	8.29164	1.11694e-16	3.9372e-14
ENSRNOG00000037850	MARC2	chr13:107401554-107432931	1330	4796.24	5814.85	936.517	1485.24	1586.56	1374.44	1371.33	1572.82	2370.61	1.92081	0.234067	8.20624	2.28224e-16	7.25618e-14
ENSRNOG00000033680	CYP2B1	chr7:99752124-99775779	1861	7888.61	6489.74	56.6442	208.154	302.7	341.917	354.802	142.371	1983.67	4.53268	0.553911	8.18305	2.76755e-16	8.62997e-14
ENSRNOG00000046608	APOA4	chr8:49163146-49165176	1173	159819	207599	2800.11	14385.9	8769.94	3713.7	4775.72	6233.17	51244	4.39318	0.540659	8.1256	4.45167e-16	1.289e-13
ENSRNOG00000033433	CSRNP1	chr8:127861111-127867216	2872	2106.29	3112.22	623.716	857.104	566.431	589.046	670.254	518.097	1131.51	2.01514	0.248855	8.09766	5.60268e-16	1.53979e-13
ENSRNOG00000036934	ABHD12	chr3:152989211-153051233	1948	5616.44	5369.58	2114.09	2557.84	2747.26	2247.85	2096.02	2478.44	3153.94	1.2185	0.150457	8.09867	5.55616e-16	1.53979e-13
ENSRNOG00000007229	NR0B2	chr5:155465274-155468590	1111	535.533	580.244	20.1402	44.0796	45.9268	73.3486	49.8428	68.2372	177.874	3.32522	0.412149	8.06802	7.14449e-16	1.89914e-13
ENSRNOG00000028701	C8G	chr3:2706036-2712619	647	395.25	490.26	57.903	99.1792	63.3234	46.266	40.6612	44.649	155.003	2.83322	0.35165	8.05691	7.82448e-16	2.04635e-13
ENSRNOG00000029001	RT1-S2	chr20:5253817-5255239	531	74.7493	69.8155	0	3.6733	3.47931	5.6422	2.6233	1.68487	20.4764	4.22615	0.534158	7.91181	2.53675e-15	6.45395e-13
ENSRNOG00000036689	P4HB	chr10:109329598-109341105	2466	84825.1	89756.3	38390.9	46914.2	34022.7	36207.1	38660.3	39249	51004.4	1.17418	0.148418	7.91129	2.54735e-15	6.45395e-13
ENSRNOG00000036676	CSNK1D	chr10:109599918-109846748	1601	5346.11	6174.79	2812.7	3364.75	2825.89	2974.57	3148.62	2910.61	3693.61	0.949633	0.120288	7.89465	2.91132e-15	7.26262e-13
ENSRNOG00000017260	CDR2	chr1:197815830-197840738	2347	3085.2	3624.2	1005.12	1408.1	1050.05	977.229	1175.24	870.235	1649.86	1.63115	0.208611	7.81913	5.31879e-15	1.28723e-12
ENSRNOG00000015895	B4GALT6	chr18:15258329-15300179	4768	3407.75	4024.47	1457.64	1585.64	1171.83	1216.46	1122.12	1088.43	1885.32	1.54346	0.200029	7.71617	1.19882e-14	2.73787e-12

## Sheet: 1N_vs_Nother
gene_id	Symbol	locus	length	A-0_0	B-0_0	A-1N_0	B-1N_0	A-4N_0	B-4N_0	A-12N_0	B-12N_0	baseMean	log2FoldChange	lfcSE	stat	pvalue	padj
ENSRNOG00000030694	RNASE1L2	chr15:31957447-31959061	791	3.07189	9.30873	984.35	833.84	13.2214	18.055	7.86991	10.1092	233.038	6.02624	0.423397	14.2331	5.70996e-46	9.25755e-42
ENSRNOG00000048088	MEST	chr4:57816008-57821886	843	12.2876	10.8602	180.632	84.486	16.7007	10.156	9.83739	10.1092	41.7073	3.26516	0.414684	7.87385	3.439e-15	1.54879e-12
ENSRNOG00000020030	CRLF1	chr16:20530520-20541796	1668	58.3659	82.2271	1302.19	2659.47	200.408	163.624	70.8292	106.147	573.937	3.72684	0.49003	7.60533	2.84174e-14	1.00159e-11
ENSRNOG00000015751	CYP4F18	chr16:19269138-19385552	2750	171.002	103.947	458.189	538.751	142.652	127.514	123.951	96.8799	219.341	1.90061	0.255059	7.45163	9.21906e-14	3.05038e-11
ENSRNOG00000010994	HAS1	chr1:60640269-60652067	2096	23.5511	20.1689	123.988	150.605	31.3138	39.4954	20.9864	32.0125	54.9308	2.20379	0.312965	7.04165	1.89974e-12	5.31042e-10
ENSRNOG00000003348	RASD1	chr10:46087071-46088803	1595	106.492	88.4329	555.113	880.368	193.449	147.826	104.932	112.044	271.302	2.38858	0.344539	6.93266	4.12995e-12	1.07998e-09
ENSRNOG00000031577	RNASE1	chr15:31897123-31898680	788	3.07189	6.20582	362.523	1231.78	32.7055	13.5413	3.93495	2.5273	204.261	4.87057	0.710491	6.85522	7.12046e-12	1.83244e-09
ENSRNOG00000010253	CD163	chr4:223769350-223802725	4223	200.697	179.969	685.395	582.831	257.469	190.706	272.823	208.081	320.943	1.49838	0.220858	6.78436	1.16603e-11	2.86437e-09
ENSRNOG00000018839	NTRK2	chr17:8156431-8464507	4750	3.07189	0	34.6159	41.6308	2.08758	1.12844	1.31165	2.5273	10.782	3.85788	0.577842	6.67635	2.44964e-11	5.67372e-09
ENSRNOG00000009907	MMP8	chr8:5771723-5780576	1401	2.04793	0	392.104	215.5	11.1338	13.5413	4.59078	5.05461	80.1727	4.51053	0.679093	6.64199	3.09466e-11	6.96857e-09
ENSRNOG00000010278	IL6	chr4:3095535-3100112	1045	1.02396	6.20582	266.857	493.447	18.7883	15.7982	1.96748	5.05461	99.9587	4.43477	0.680961	6.51252	7.39018e-11	1.49771e-08
ENSRNOG00000004062	C4BPA	chr13:52430755-52466244	2309	1.02396	6.20582	40.9097	41.6308	4.17517	3.38532	1.96748	1.68487	12.531	3.3609	0.51728	6.49725	8.18011e-11	1.63734e-08
ENSRNOG00000006715	CCR1	chr8:132147928-132153481	1846	148.475	144.285	1090.72	826.493	248.422	251.642	105.588	158.378	369.904	2.30868	0.367137	6.28832	3.2091e-10	5.41971e-08
ENSRNOG00000015441	IL4R	chr1:203940372-203952928	3326	3761.02	4165.66	11474.9	11672.5	3810.54	2926.05	2412.13	2376.51	5301.08	1.76708	0.281451	6.27846	3.41953e-10	5.65723e-08
ENSRNOG00000025074	FGG	chr2:201315317-201454615	1556	2.04793	1.55145	47.8329	41.6308	6.95861	2.25688	0.655826	4.21217	13.4046	3.41331	0.546173	6.2495	4.11765e-10	6.67594e-08
ENSRNOG00000047491	TRO	chrX:23502764-23511033	4014	20.4793	13.9631	169.303	170.196	45.9268	13.5413	20.9864	16.0063	58.3329	2.71296	0.451019	6.01517	1.79694e-09	2.46897e-07
ENSRNOG00000020901	S1PR5	chr8:22323890-22328878	2040	11.2636	13.9631	74.2668	62.4461	22.9634	15.7982	15.7398	16.8487	28.9852	1.97469	0.330061	5.9828	2.19336e-09	2.98831e-07
ENSRNOG00000051158	C2	chr20:6616010-6641139	2554	227.319	848.646	2913.29	5591.34	324.7	247.128	525.316	400.156	1371.77	2.96881	0.500218	5.93504	2.93781e-09	3.90416e-07
ENSRNOG00000015084	NECAB2	chr19:62834864-62861089	1537	14.3355	20.1689	79.3019	84.486	11.8296	7.89908	5.24661	14.3214	29.3331	2.53303	0.428545	5.91077	3.40505e-09	4.41648e-07
ENSRNOG00000011153	IL17RA	chr4:220083471-220106001	3845	1356.75	1374.59	3430.75	3397.8	1738.96	1532.42	1060.47	1228.27	1883.1	1.2688	0.215449	5.8891	3.88304e-09	4.99648e-07
ENSRNOG00000028259	MCEMP1	chr12:4375802-4379100	1151	270.326	259.093	2157.51	2319.08	418.908	521.339	134.444	219.033	782.339	2.63892	0.453486	5.81918	5.91366e-09	7.43241e-07
ENSRNOG00000001302	ADORA2A	chr20:16449384-16466147	2485	147.451	128.771	356.858	390.595	167.703	180.55	112.146	133.105	201.472	1.32546	0.22884	5.79209	6.95167e-09	8.60362e-07
ENSRNOG00000036645	IFITM6	chr1:220737290-220738225	312	4.09585	3.10291	28.3221	51.4262	6.26275	2.25688	1.31165	2.5273	12.1309	3.17259	0.548195	5.78734	7.15077e-09	8.78299e-07
ENSRNOG00000013162	ZCCHC12	chrX:122958361-122961546	2089	62.4617	94.6387	242.941	227.745	88.3744	49.6514	71.485	55.6007	111.121	1.67557	0.290361	5.77065	7.89651e-09	9.48341e-07
ENSRNOG00000030729	C4B	chr20:6381702-6396071	5314	1754.05	2192.21	8459.5	14036.9	4063.13	2590.9	1992.4	2576.16	4674.75	2.03445	0.355724	5.71918	1.07037e-08	1.23078e-06
ENSRNOG00000011668	NFIL3	chr17:14372305-14374095	1790	600.042	543.009	1436.87	1830.53	600.528	492	312.829	427.114	776.757	1.64986	0.288918	5.71049	1.12654e-08	1.28624e-06
ENSRNOG00000018054	F2RL2	chr2:45296358-45569036	1505	46.0783	46.5436	346.159	260.804	70.282	58.6789	19.0189	27.8003	108.948	2.53723	0.444411	5.70918	1.1352e-08	1.28707e-06
ENSRNOG00000002417	SERPINB10	chr13:32615861-32633549	1347	0	0	27.0633	29.3864	2.08758	1.12844	2.6233	0.842434	7.80508	3.68969	0.64735	5.69968	1.20031e-08	1.33292e-06
ENSRNOG00000004029	PVRL4	chr13:94383717-94501245	3042	21.5032	13.9631	136.575	95.5059	25.051	34.9816	20.3306	32.0125	47.4461	2.10932	0.371967	5.6707	1.42214e-08	1.54746e-06
ENSRNOG00000031163	NFKBIZ	chr11:50420562-50447282	2990	1673.16	1951.73	3768.73	3986.76	1524.63	1371.05	1131.96	1395.91	2093.32	1.31927	0.234396	5.62841	1.81881e-08	1.94003e-06
ENSRNOG00000007717	SLC15A5	chr4:236224616-236317092	1716	0	0	27.6927	22.0398	1.39172	2.25688	0	0	6.57661	4.06288	0.722469	5.6236	1.87016e-08	1.98175e-06
ENSRNOG00000018198	DAPK1	chr17:6525246-6683920	5878	425.969	477.848	1120.3	833.84	411.95	455.89	331.848	393.417	555.006	1.19757	0.214188	5.5912	2.25502e-08	2.31396e-06
ENSRNOG00000018394	CHRDL2	chr1:171209851-171237286	1529	58.3659	119.462	353.712	563.24	75.8489	94.789	46.5636	37.9095	167.503	2.45213	0.438724	5.58923	2.28078e-08	2.32568e-06
ENSRNOG00000004854	HAS2	chr7:97055457-97081461	4174	72.7014	48.0951	598.54	495.896	137.781	81.2477	92.4714	152.481	208.802	2.31353	0.417396	5.54275	2.97752e-08	2.94357e-06
ENSRNOG00000039204	PRAM1	chr7:18687953-18693103	1986	81.917	85.33	465.741	407.737	165.615	116.229	60.9918	95.1951	183.968	1.99702	0.364517	5.47853	4.28869e-08	4.01923e-06
ENSRNOG00000017386	IL11	chr1:75891523-75897820	1674	7.16774	27.9262	125.876	211.827	34.0972	28.211	15.084	20.2184	58.2518	2.65437	0.485133	5.47143	4.46423e-08	4.15969e-06
ENSRNOG00000002244	PDGFRA	chr14:35356434-35409311	6514	1948.6	1835.37	4097.89	3628	2290.08	2246.72	2384.58	2115.35	2561.09	0.834209	0.152622	5.46586	4.60678e-08	4.24373e-06
ENSRNOG00000050478	LOC684841	chr17:45480512-45480923	411	3.07189	12.4116	42.7978	48.9774	7.65447	10.156	6.55826	8.42434	17.3943	2.33004	0.426586	5.46206	4.70633e-08	4.28673e-06
ENSRNOG00000019854	NAPSA	chr1:101642883-101655189	1366	495.598	560.075	2289.05	3114.96	1000.65	786.523	386.281	592.231	1146.14	1.96261	0.367307	5.34324	9.13012e-08	7.51404e-06
ENSRNOG00000016496	CTSC	chr1:158231465-158263672	2459	6594.32	6710.04	13956.5	14272	8612.67	7514.28	5697.16	6339.32	8682.92	1.00261	0.188682	5.31374	1.07398e-07	8.66287e-06
ENSRNOG00000021619	CELA3B	chr5:159520757-159528921	907	1.02396	0	20.1402	41.6308	4.17517	2.25688	1.31165	0.842434	8.77231	3.48955	0.660914	5.27988	1.29267e-07	1.01565e-05
ENSRNOG00000022099	TRIM72	chr1:206472854-206480749	2363	81.917	93.0873	156.716	208.154	66.8027	64.3211	66.2384	71.6069	100.73	1.25773	0.239996	5.24061	1.60044e-07	1.22976e-05
ENSRNOG00000010898	PROK2	chr4:196648793-196662391	387	0	0	22.6577	14.6932	0.695861	1.12844	0	0	4.96719	3.92972	0.750289	5.23761	1.62673e-07	1.23822e-05
ENSRNOG00000015052	STAR	chr16:70698592-70705478	3396	69.6295	68.264	422.943	575.484	162.136	93.6605	47.2195	51.3885	184.86	2.38198	0.455818	5.22573	1.73474e-07	1.29015e-05
ENSRNOG00000003687	RGS2	chr13:65830460-65834020	1641	751.589	752.456	2967.53	3510.45	1251.16	1415.06	784.368	924.15	1536.86	1.64589	0.315224	5.22134	1.77638e-07	1.31509e-05
ENSRNOG00000019587	PTPRN	chr9:82215892-82231061	3512	181.241	212.549	862.251	966.079	395.945	206.505	165.268	155.85	390.904	1.93659	0.371327	5.21532	1.83499e-07	1.35231e-05
ENSRNOG00000002802	CXCL1	chr14:18653038-18654811	926	32.7668	44.9922	1541.35	2605.6	293.653	126.385	31.4796	100.25	590.703	3.48011	0.669869	5.19521	2.04486e-07	1.50015e-05
ENSRNOG00000006388	PYGL	chr6:102045138-102091169	2767	709.606	645.405	1324.84	1397.08	784.931	684.963	531.219	544.213	824.96	1.03607	0.199498	5.19339	2.06495e-07	1.50807e-05
ENSRNOG00000012181	LPL	chr16:22431493-22455871	3608	2238.38	1813.65	5929.39	6974.38	2365.93	1375.57	1006.04	1342	2865.76	1.82639	0.352241	5.18506	2.15948e-07	1.57003e-05
ENSRNOG00000019268	PELP1	chr10:56739144-56756177	3443	824.29	1003.79	2723.33	2979.05	1560.12	1117.16	947.012	1146.55	1530.93	1.32608	0.25927	5.11466	3.14302e-07	2.17831e-05

## Sheet: 4N_vs_Nother
gene_id	Symbol	locus	length	A-0_0	B-0_0	A-1N_0	B-1N_0	A-4N_0	B-4N_0	A-12N_0	B-12N_0	baseMean	log2FoldChange	lfcSE	stat	pvalue	padj
ENSRNOG00000011130	CALCA	chr1:191158062-191162954	518	1.02396	0	3.77628	6.12217	32.7055	49.6514	1.31165	1.68487	12.094	2.40554	0.458231	5.24961	1.5242e-07	0.00139906
ENSRNOG00000032401	H3F3C	chr7:95418531-95419526	995	267.254	271.505	221.542	268.151	960.288	977.229	371.197	465.024	474.351	1.45088	0.295003	4.91818	8.7354e-07	0.00534548
ENSRNOG00000008168	WNT5B	chr4:217413754-217429687	2122	394.226	440.613	478.958	461.612	759.88	722.202	428.91	415.32	511.676	0.744282	0.128389	5.79708	6.74789e-09	0.000123878

## Sheet: 12N_vs_Nother
gene_id	GENE_SHORT_NAME	locus	length	A-0_0	B-0_0	A-1N_0	B-1N_0	A-4N_0	B-4N_0	A-12N_0	B-12N_0	baseMean	log2FoldChange	lfcSE	stat	pvalue	padj
ENSRNOG00000031607	RT1-CE3	chr20:7008108-7019717	1038	7.16774	4.65436	10.6995	2.44887	6.26275	6.77064	33.4471	129.735	25.2377	2.94934	0.55181	5.34485	9.04896e-08	0.00078624
ENSRNOG00000014616	IARS	chr17:17414465-17461081	4494	772.068	819.168	813.159	815.473	873.306	905.009	1398.22	1144.03	940.817	0.606358	0.130098	4.66079	3.15002e-06	0.00698045
ENSRNOG00000025302	CDCA2	chr15:47186190-47231339	3647	301.045	359.938	316.578	317.128	300.612	312.578	518.758	465.024	361.126	0.62506	0.135208	4.62295	3.78324e-06	0.00733571
ENSRNOG00000024602	PLEKHA7	chr1:192397588-192463974	974	2.04793	1.55145	3.77628	0	2.08758	3.38532	41.9728	11.7941	8.34663	2.66001	0.603636	4.40664	1.04987e-05	0.0136377
ENSRNOG00000048959	AABR06062061.1	chr9:111141129-111404714	997	44.0304	37.2349	38.3922	35.5086	56.3648	57.5504	133.133	93.5102	61.8997	1.27487	0.293102	4.34957	1.36405e-05	0.0152751
ENSRNOG00000017017	ZBTB43	chr3:17825498-17834966	1512	8.1917	4.65436	4.40566	4.89774	2.78344	3.38532	41.9728	16.0063	10.7199	2.18092	0.513794	4.24474	2.18847e-05	0.0196954
ENSRNOG00000010528	LOC100911166	chr3:118974027-119202861	3169	63.4857	60.5067	59.1617	44.0796	52.1896	65.4495	114.769	112.044	71.3408	0.958586	0.226705	4.22834	2.35418e-05	0.0196954
ENSRNOG00000038572	NCAPG	chr14:69941734-69962624	2810	108.54	134.977	155.457	124.892	123.863	134.284	264.954	207.239	156.507	0.838952	0.200794	4.17816	2.93872e-05	0.0198568
ENSRNOG00000029061	HIRIP3	chr1:205278317-205281341	2194	616.426	595.759	642.597	587.728	718.129	714.303	999.478	941.841	725.996	0.584089	0.139757	4.17932	2.9238e-05	0.0198568
ENSRNOG00000004744	FAM84B	chr7:101707858-101708791	933	7.16774	7.75727	6.92318	4.89774	2.78344	4.51376	44.5961	16.8487	12.0954	2.03211	0.493724	4.11587	3.85714e-05	0.0230123
ENSRNOG00000016134	MSH6	chr6:21616773-21634251	4074	501.742	496.466	528.679	427.328	542.772	617.257	919.468	808.737	604.583	0.723743	0.17978	4.02571	5.68041e-05	0.0275358
ENSRNOG00000039721	AABR06029009.1	chr4:15671897-15672769	872	10.2396	7.75727	6.92318	1.22443	7.65447	18.055	90.5039	37.9095	22.5829	2.25242	0.569831	3.95279	7.72445e-05	0.027542
ENSRNOG00000023453	LRBA	chr2:204990263-205322437	6411	75.7733	51.198	28.3221	23.2642	20.8758	42.8807	426.287	96.8799	95.3278	2.1626	0.545705	3.96294	7.40326e-05	0.027542
ENSRNOG00000002607	SOX9	chr10:100965136-100968386	1524	16.3834	9.30873	8.81132	7.34661	16.7007	27.0826	82.634	48.8612	27.0878	1.89811	0.479851	3.95563	7.63329e-05	0.027542
ENSRNOG00000015585	SUV39H2	chr17:80406939-80425965	4132	82.941	69.8155	75.5256	58.7728	75.153	60.9358	144.937	118.783	85.8977	0.878233	0.221211	3.97012	7.18372e-05	0.027542
ENSRNOG00000005602	MTHFD1	chr6:108694404-108761891	3333	787.428	862.609	750.85	775.067	884.44	1009.95	1395.6	1273.76	966.258	0.652318	0.164025	3.97694	6.9809e-05	0.027542
ENSRNOG00000009125	DIS3	chr15:86977710-87005406	3743	334.836	283.916	312.802	366.106	338.884	324.991	470.227	482.715	363.767	0.541625	0.136558	3.96626	7.30081e-05	0.027542
ENSRNOG00000031292	LOC100365438	chr3:22802805-22803375	372	99.3244	121.013	5.03504	7.34661	96.7247	156.853	3171.57	292.325	490.81	2.62508	0.669262	3.92235	8.76877e-05	0.0295698
ENSRNOG00000048025	CSTF2	chrX:104716667-104765479	4263	402.417	404.93	448.119	405.288	461.356	534.881	775.186	657.941	510.401	0.684939	0.17486	3.91706	8.96338e-05	0.029583
ENSRNOG00000047190	LOC691603	chr15:38499890-38790387	757	1.02396	3.10291	3.77628	1.22443	4.87103	10.156	23.6097	40.4368	11.0188	2.27848	0.586062	3.88779	0.000101161	0.0320246
ENSRNOG00000003031	ATP2B4	chr13:55157901-55204057	3779	9.21567	4.65436	25.8046	4.89774	4.87103	20.3119	266.921	20.2184	44.3731	2.44178	0.64389	3.79223	0.000149301	0.0325603
ENSRNOG00000046805	AABR06069517.3	chr11:88525915-88526429	393	79.8691	83.7786	35.8747	11.0199	116.209	201.991	670.254	935.944	267.264	2.35114	0.608143	3.86611	0.000110587	0.0325603
ENSRNOG00000008437	SS18L1	chr3:181673459-181691930	1332	3.07189	1.55145	3.1469	3.6733	2.08758	1.12844	31.4796	7.58191	6.71859	2.22999	0.587561	3.79533	0.000147445	0.0325603
ENSRNOG00000021330	SPRTN	chr19:68363401-68367942	1407	8.1917	9.30873	15.1051	1.22443	9.74206	15.7982	85.2573	41.2793	23.089	2.1239	0.555181	3.8256	0.000130453	0.0325603
ENSRNOG00000037227	YES1	chr9:121252195-121327338	1849	26.623	13.9631	35.8747	11.0199	13.2214	30.4679	217.734	48.8612	49.5866	2.09221	0.546269	3.83	0.000128141	0.0325603
ENSRNOG00000025042	PDE3A	chr4:239659269-239921900	3426	21.5032	7.75727	12.5876	9.79547	11.1338	10.156	113.458	23.5882	26.2758	2.01355	0.531028	3.79179	0.000149567	0.0325603
ENSRNOG00000051196	PARP4	chr15:40718851-40799440	1447	115.708	32.5806	77.4137	34.2842	54.973	99.3027	463.669	206.396	135.278	1.91502	0.499724	3.83215	0.000127028	0.0325603
ENSRNOG00000004448	ACSS3	chr7:49087350-49265391	2442	16.3834	12.4116	16.3639	9.79547	11.8296	16.9266	78.6991	26.1155	23.4388	1.68545	0.445777	3.78093	0.000156247	0.0325603
ENSRNOG00000016690	IDI1	chr17:59783325-59789305	1201	52.2221	74.4698	96.9245	86.9348	60.5399	168.138	383.658	256.1	147.161	1.63056	0.426472	3.82338	0.000131634	0.0325603
ENSRNOG00000015124	GPAM	chr1:283249328-283278757	2585	47.1023	29.4776	39.6509	30.6109	16.7007	44.0092	170.515	75.8191	56.7734	1.62745	0.426316	3.81747	0.000134826	0.0325603
ENSRNOG00000014723	CBFA2T3	chr19:66150086-66218763	2684	53.2461	57.4038	57.903	34.2842	37.5765	50.7798	167.236	89.298	68.2846	1.30469	0.337497	3.86578	0.000110735	0.0325603
ENSRNOG00000015269	ATF7	chr7:141928319-142016018	2223	32.7668	26.3747	32.0984	20.8154	22.9634	29.3394	85.9132	49.7036	37.4501	1.23374	0.323979	3.80808	0.000140049	0.0325603
ENSRNOG00000002818	EFTUD2	chr10:90705842-90752820	3215	1606.6	1553.01	1555.83	1546.46	1543.42	1574.17	1872.38	1940.97	1646.84	0.288957	0.0764629	3.77905	0.000157428	0.0325603
ENSRNOG00000038933	SPCS3	chr16:39826989-39832408	747	51.1981	40.3378	48.4623	34.2842	39.6641	69.9633	201.994	86.7707	71.364	1.46659	0.388642	3.77363	0.000160892	0.0328389
ENSRNOG00000015520	TICRR	chr1:142352620-142393849	5655	40.9585	29.4776	58.5323	19.5909	33.4013	60.9358	182.975	106.989	66.5573	1.62723	0.433213	3.75618	0.000172527	0.0343897
ENSRNOG00000005823	UTP20	chr7:29399169-29479994	8731	395.25	527.495	531.197	528.956	504.499	568.734	807.321	785.991	580.12	0.638556	0.170027	3.7556	0.000172924	0.0343897
ENSRNOG00000012864	ERN1	chr10:94340404-94400743	2954	4.09585	3.10291	9.4407	1.22443	2.08758	7.89908	89.8481	10.9516	15.9235	2.38608	0.636962	3.74603	0.000179652	0.0352755
ENSRNOG00000049988	MBTD1	chr10:81422272-81472427	1845	12.2876	4.65436	12.5876	7.34661	4.17517	9.02752	71.485	20.2184	17.5714	1.98858	0.532699	3.73303	0.000189192	0.0362314
ENSRNOG00000016212	ANKFY1	chr10:59017117-59065842	3510	17.4074	7.75727	24.5458	4.89774	3.47931	12.4128	175.761	31.1701	34.4895	2.27817	0.61462	3.70663	0.000210035	0.0377618
ENSRNOG00000027971	LRRC31	chr2:136015534-136035323	1479	8.1917	4.65436	5.03504	1.22443	3.47931	10.156	57.0568	17.6911	13.3452	2.15211	0.579535	3.7135	0.000204409	0.0377618
ENSRNOG00000012051	NCAPH	chr3:126109412-126130107	2196	192.505	164.454	285.738	182.441	190.666	223.431	464.325	360.562	257.658	0.961103	0.259168	3.70842	0.000208555	0.0377618
ENSRNOG00000017129	TTLL4	chr9:81703011-81717068	3582	107.516	96.1902	84.9663	93.057	99.5081	101.56	182.32	140.687	113.203	0.716954	0.193722	3.70095	0.000214793	0.0377618
ENSRNOG00000029938	PIK3C2B	chr13:54919437-54977002	5340	27.647	13.9631	45.9447	7.34661	18.7883	38.367	276.103	67.3947	61.679	2.12385	0.577703	3.67637	0.000236576	0.0385024
ENSRNOG00000048800	NR3C1	chr18:32327620-32348467	1266	7.16774	3.10291	6.2938	4.89774	2.08758	4.51376	47.8753	10.9516	10.8338	2.07618	0.564687	3.67669	0.000236279	0.0385024
ENSRNOG00000001518	ITGA6	chr3:64931856-65001002	3374	153.594	107.05	148.534	48.9774	41.7517	100.431	842.736	233.354	209.109	1.96743	0.534406	3.68152	0.000231849	0.0385024
ENSRNOG00000008895	HNF4A	chr3:166127643-166152838	1443	265.206	136.528	96.2951	51.4262	105.771	226.816	1150.32	428.799	307.09	1.96585	0.535528	3.67087	0.00024173	0.0385024
ENSRNOG00000027320	AGO1	chr5:148214327-148246407	4454	25.5991	20.1689	44.0566	12.2443	13.2214	38.367	203.962	64.025	52.4995	1.95076	0.530068	3.68022	0.000233035	0.0385024
ENSRNOG00000050108	LOC100911319	chr7:2329848-2331791	1449	18.4313	4.65436	24.5458	11.0199	9.0462	23.6972	117.393	44.649	31.6753	1.94884	0.534442	3.64649	0.000265844	0.0385024
ENSRNOG00000005715	LGR4	chr3:107652227-107752743	3499	277.494	209.446	153.569	134.688	183.707	350.945	960.129	465.024	341.399	1.52206	0.418458	3.6373	0.000275513	0.0385024
ENSRNOG00000020557	RYR1	chr1:89151995-89241192	11709	8.1917	9.30873	11.3288	9.79547	6.26275	6.77064	30.168	21.0609	12.7277	1.43746	0.395106	3.63816	0.000274595	0.0385024
