# Supplementary material for: Identifying the Growth Factors for Improving Neointestinal Regeneration in Rats through Transcriptome Analysis Using RNA-Seq Data
Source: Biomed Res Int. 2018 Dec 13;2018:4037865. doi: 10.1155/2018/4037865 (PMC6311312; doi:10.1155/2018/4037865)
Supplement: Supplementary Materials — Suppl. Table 1: Gene Ontology analysis on week 1 “A” condition upregulated genes. Suppl. Table 2: Gene Ontology analysis on week 1 “N” condition upregulated genes. Suppl. Table 3: Oligonucleotide sequences for qPCR validation of gene expression. Suppl. Figure 1: Flowchart of this study. Suppl. Figure 2: Stage specific genomic analysis for week 1 “N” or week 1 “A” conditions. Suppl. Figure 3: Stage specific genomic analysis for 1-, 4-, and 12-week “N” vs. “A” conditions. Suppl. Dataset 1: A_stage_specific.xlsx. Suppl. Dataset 2: N_stage_specific.xlsx. Suppl. Dataset 3: NvsA.xlsx. Suppl. Dataset 4: GF_time_matrix.xlsx. [file 4037865.f1.zip › S3_NvsA.xlsx]

## Sheet: 1N-1A
gene_id	Symbol	locus	length	A_1A	A_1B	N_1A	N_1B	baseMean	log2FoldChange	lfcSE	stat	pvalue	padj
ENSRNOG00000016915	BARX1	chr17:16875793-16879269	1372	2.56414	27.7246	575.883	550.995	282.581	4.35555	0.625629	6.96188	3.36e-12	4.89e-10
ENSRNOG00000018611	TPSB2	chr10:14539008-14540808	1095	4.48724	0	52.2385	62.4461	28.7431	3.45088	0.765435	4.5084	6.53e-06	9.69e-05
ENSRNOG00000017609	CNGA4	chr1:177249671-177253809	2345	0	0	25.8046	24.4887	12.1928	3.33792	0.868822	3.84188	0.000122093	0.00114375
ENSRNOG00000018454	APOE	chr1:81878372-81881182	1144	13701.5	17221.6	163312	175426	90278.5	3.31067	0.296531	11.1647	6.07e-29	2.21e-25
ENSRNOG00000011557	S100A8	chr2:209508170-209508690	357	392.954	3296.92	18886.4	41612.4	15593.9	3.28771	0.666418	4.9334	8.08e-07	1.64e-05
ENSRNOG00000028043	CXCL3	chr14:18729344-18748597	674	1.9231	6.93115	118.323	48.9774	43.217	3.26742	0.713831	4.5773	4.71e-06	7.34e-05
ENSRNOG00000022859	TREM1	chr9:13649245-13660307	919	37.821	113.209	885.538	935.468	481.665	3.23552	0.498065	6.49618	8.24e-11	7.27e-09
ENSRNOG00000027811	LILRB4	chr1:75149297-75154600	1152	38.462	190.607	1982.55	1078.73	807.274	3.19567	0.604368	5.28762	1.24e-07	3.46e-06
ENSRNOG00000033685	ELANE	chr7:12711158-12963915	905	0	3.46557	39.0216	42.8552	20.7287	3.18706	0.799295	3.98734	6.68e-05	0.000692289
ENSRNOG00000031577	RNASE1	chr15:31897123-31898680	788	9.61551	86.6393	362.523	1231.78	410.082	3.18423	0.701713	4.5378	5.68e-06	8.65e-05
ENSRNOG00000014603	SGCG	chr15:45295349-45401752	1496	35.2569	129.381	961.063	1004.04	520.081	3.17226	0.535327	5.92584	3.11e-09	1.58e-07
ENSRNOG00000008947	CPZ	chr14:80028902-80052295	2143	273.721	697.735	4613.35	6193.19	2872.62	3.17001	0.464173	6.82937	8.53e-12	1.05e-09
ENSRNOG00000004647	IL10	chr13:52824652-52829120	1283	44.2313	32.3454	470.147	336.719	216.205	3.15985	0.427594	7.38985	1.47e-13	3.29e-11
ENSRNOG00000011483	S100A9	chr2:209531411-209533744	474	585.905	4527.19	25141.8	47323.2	18871.5	3.15595	0.650256	4.8534	1.21e-06	2.3e-05
ENSRNOG00000026235	HK3	chr17:12246815-12261635	3027	69.2316	174.434	1445.69	1223.21	712.46	3.15472	0.467067	6.75431	1.44e-11	1.59e-09
ENSRNOG00000047175	CRYAA	chr20:12621882-12625626	1102	11.5386	3.46557	79.3019	132.239	54.979	3.12499	0.657119	4.7556	1.98e-06	3.51e-05
ENSRNOG00000003172	SERPINF1	chr10:61954920-61969094	1410	1155.78	2182.16	13757.6	20580.3	9183.71	3.12293	0.411589	7.58751	3.26e-14	9.5e-12
ENSRNOG00000005277	PTPRV	chr13:56986604-57006799	5446	151.925	414.714	3076.41	2954.56	1613.07	3.1038	0.472703	6.56607	5.17e-11	4.82e-09
ENSRNOG00000027855	FCAR	chr1:75285477-75318514	1708	1.28207	26.5694	233.5	232.642	120.895	3.09869	0.732584	4.2298	2.34e-05	0.000284165
ENSRNOG00000021771	TRIM29	chr8:46295149-46319894	2832	6.41034	3.46557	50.3504	80.8127	34.0673	3.08174	0.683806	4.50674	6.58e-06	9.75e-05
ENSRNOG00000013578	TREM2	chr9:13532919-13539372	1157	137.822	170.968	1720.72	1234.23	799.537	3.07754	0.361075	8.52327	1.55e-17	1.51e-14
ENSRNOG00000020030	CRLF1	chr16:20530520-20541796	1668	64.1034	270.315	1302.19	2659.47	1044.68	3.07406	0.583285	5.27025	1.36e-07	3.74e-06
ENSRNOG00000007717	SLC15A5	chr4:236224616-236317092	1716	0	1.15519	27.6927	22.0398	12.4601	3.06406	0.850597	3.60225	0.000315477	0.00255884
ENSRNOG00000036645	IFITM6	chr1:220737290-220738225	312	0	3.46557	28.3221	51.4262	19.929	3.0587	0.813677	3.75911	0.000170517	0.00151798
ENSRNOG00000004578	CTHRC1	chr7:78271769-78282052	1216	258.978	1271.87	8534.39	8812.25	4612.63	3.03803	0.5742	5.2909	1.22e-07	3.4e-06
ENSRNOG00000002548	TNN	chr13:82737824-82812581	5746	192.31	889.497	6622.97	5441.39	3217.06	3.0305	0.568574	5.33001	9.82e-08	2.82e-06
ENSRNOG00000008525	CSF3	chr10:86413102-86415475	1294	3.20517	40.4317	258.046	357.535	160.63	3.02993	0.701483	4.31932	1.57e-05	0.000203742
ENSRNOG00000004805	STAC2	chr10:85782663-85799680	2880	22.4362	71.6218	519.238	481.203	267.537	3.02904	0.528719	5.72902	1.01e-08	4.25e-07
ENSRNOG00000014532	LBP	chr3:160792746-160819996	2428	240.388	1428.97	6226.46	14152	5358.97	3.01809	0.630551	4.78643	1.7e-06	3.07e-05
ENSRNOG00000001806	FETUB	chr11:84745602-84756917	1388	6.41034	43.8973	263.71	368.555	166.514	3.01589	0.651505	4.62911	3.67e-06	5.96e-05
ENSRNOG00000011205	CCL3	chr10:70501115-70502669	757	41.0262	113.209	991.273	593.851	426.504	3.00532	0.518595	5.79512	6.83e-09	3.06e-07
ENSRNOG00000025001	PCOLCE	chr12:24171334-24177682	1561	2516.7	4047.79	23898.2	36429.4	16307.8	2.99559	0.383068	7.82001	5.28e-15	1.92e-12
ENSRNOG00000012817	LRRC17	chr4:10021507-10177069	2063	167.951	324.609	2205.35	2360.71	1236.26	2.99249	0.401678	7.44998	9.34e-14	2.23e-11
ENSRNOG00000003183	FMOD	chr13:55928422-55939039	2943	350.004	1237.21	6434.15	9965.67	4384.16	2.98259	0.53206	5.60575	2.07e-08	7.81e-07
ENSRNOG00000011101	TWIST1	chr6:63023390-63025505	1618	15.3848	98.1912	631.897	673.439	346.417	2.96661	0.624766	4.74835	2.05e-06	3.62e-05
ENSRNOG00000013395	PGLYRP1	chr1:81052611-81057412	630	15.3848	99.3464	467	895.061	359.167	2.96223	0.64422	4.59816	4.26e-06	6.73e-05
ENSRNOG00000005887	PSCA	chr7:115995491-116157536	457	1.28207	2.31038	74.2668	11.0199	21.6974	2.95154	0.837609	3.52378	0.000425445	0.00328603
ENSRNOG00000020197	CD248	chr1:227377519-227380084	2565	271.798	231.038	1518.69	3002.31	1222.63	2.94592	0.405911	7.25755	3.94e-13	7e-11
ENSRNOG00000014378	IL1R2	chr9:46526297-46566508	1377	61.5392	314.212	1957.37	2043.58	1069.63	2.94441	0.582412	5.05555	4.29e-07	9.77e-06
ENSRNOG00000013793	C1QTNF9	chr15:44886442-44893075	1191	28.8465	21.9486	242.311	225.296	126.66	2.93927	0.444332	6.61503	3.71e-11	3.66e-09
ENSRNOG00000020733	CAMP	chr8:117283077-117284884	578	12.1796	19.6382	101.96	236.316	89.9381	2.92959	0.581236	5.04027	4.65e-07	1.04e-05
ENSRNOG00000013720	AEBP1	chr14:86792972-86802766	3792	1668.61	3225.29	18975.2	24307.5	11760.6	2.92806	0.401391	7.29479	2.99e-13	5.89e-11
ENSRNOG00000028896	A2M	chr4:221393210-221442944	4595	111.54	307.281	1714.43	2207.65	1059.59	2.92076	0.48142	6.06697	1.3e-09	7.48e-08
ENSRNOG00000036834	GPR84	chr7:142714631-142716825	1493	5.7693	13.8623	83.7075	133.463	57.7438	2.9115	0.609552	4.77646	1.78e-06	3.2e-05
ENSRNOG00000015393	SLC32A1	chr3:160500059-160504727	2385	0.641034	0	16.9933	29.3864	11.4165	2.90487	0.859224	3.3808	0.000722749	0.00509845
ENSRNOG00000036837	NFE2	chr7:142654121-142661467	1652	20.5131	91.2601	465.112	679.561	306.52	2.89479	0.579772	4.99299	5.95e-07	1.26e-05
ENSRNOG00000010529	THBS2	chr1:57842345-57871988	5728	618.598	3768.23	23756.6	22398.6	12360.8	2.89047	0.60569	4.7722	1.82e-06	3.26e-05
ENSRNOG00000008697	NOV	chr7:95015158-95022176	1448	51.9237	97.0361	470.147	882.817	365.735	2.88798	0.472969	6.10605	1.02e-09	6.13e-08
ENSRNOG00000021155	CTSK	chr2:216154150-216164778	1433	383.338	925.308	5755.05	5759.74	3135.65	2.88184	0.444859	6.4781	9.29e-11	8.05e-09
ENSRNOG00000031851	NDUFA4L2	chr7:70995343-70996777	249	15.3848	33.5005	239.164	211.827	122.346	2.86552	0.510724	5.6107	2.02e-08	7.64e-07
ENSRNOG00000011292	COL1A2	chr4:31041995-31598338	4464	17361.8	60407.3	341126	378316	194804	2.86453	0.515217	5.55986	2.7e-08	9.73e-07
ENSRNOG00000008759	CSF3R	chr5:147796333-147820326	2981	102.565	443.593	2772.42	2505.19	1424.97	2.86138	0.557423	5.13322	2.85e-07	6.92e-06
ENSRNOG00000012083	ST6GALNAC2	chr10:105313762-105331475	1995	380.774	534.853	3335.08	4043.08	2025.74	2.8532	0.335466	8.50518	1.81e-17	1.65e-14
ENSRNOG00000025735	WDR86	chr4:6960243-6962522	1241	14.7438	19.6382	122.729	199.583	87.2349	2.84903	0.522545	5.45223	4.97e-08	1.59e-06
ENSRNOG00000017539	MMP9	chr3:167597816-167605882	2987	258.978	419.334	2421.85	3099.04	1513.56	2.84086	0.37129	7.65131	1.99e-14	6.3e-12
ENSRNOG00000017477	MMP23	chr5:176554525-176557315	1403	310.901	452.835	2396.05	3871.66	1714.28	2.83892	0.384405	7.38522	1.52e-13	3.36e-11
ENSRNOG00000050110	LOC100911790	chr11:70524198-70566841	321	8.33344	110.898	690.43	748.129	380.315	2.83871	0.70221	4.04254	5.29e-05	0.000567184
ENSRNOG00000011023	LOC497963	chr10:65335227-65363144	3495	2.56414	5.77596	60.4205	47.7529	28.6287	2.83148	0.695729	4.06979	4.71e-05	0.000513828
ENSRNOG00000023576	RGD1305645	chr9:50191736-50212523	447	18.59	12.7071	111.4	183.665	79.651	2.82763	0.538665	5.24933	1.53e-07	4.13e-06
ENSRNOG00000009342	FCNB	chr3:11974638-11983071	1182	126.925	329.229	1572.19	2404.79	1081.07	2.82447	0.482437	5.85459	4.78e-09	2.27e-07
ENSRNOG00000011236	LILRB3	chr1:70045571-70053419	2630	46.1544	125.916	694.835	804.453	408.254	2.8174	0.489714	5.75316	8.76e-09	3.76e-07
ENSRNOG00000043007	RCN3	chr1:102141919-102151199	1438	1462.2	2537.95	13095.5	19222.4	8860.17	2.81087	0.393086	7.15079	8.63e-13	1.44e-10
ENSRNOG00000014812	NLRP12	chr1:63493719-63521353	3438	7.05137	41.5869	213.989	296.313	136.363	2.80721	0.639012	4.39304	1.12e-05	0.000152718
ENSRNOG00000021220	CPXM1	chr3:129414246-129421045	2367	485.263	660.769	3669.29	5333.64	2476.09	2.80447	0.35321	7.93994	2.02e-15	8.42e-13
ENSRNOG00000018458	NCR1	chr1:75322401-75366003	1042	3.20517	1.15519	35.2453	30.6109	17.0993	2.80437	0.788861	3.55496	0.00037803	0.0029654
ENSRNOG00000011821	S100A4	chr2:209431369-209433679	489	1099.37	1742.03	11546	10590.1	6112.51	2.79788	0.351951	7.94961	1.87e-15	8.02e-13
ENSRNOG00000049020	TCEAL3	chrX:107206873-107208817	1075	22.4362	39.2765	307.137	211.827	142.171	2.79359	0.487825	5.72662	1.02e-08	4.29e-07
ENSRNOG00000006299	PRRX2	chr3:15040948-15077369	1230	60.2572	60.0699	371.964	591.402	264.021	2.79093	0.407523	6.84852	7.46e-12	9.53e-10
ENSRNOG00000048887	NOS2	chr10:66842432-66860723	2863	39.1031	166.348	816.935	1067.71	510.188	2.78383	0.565823	4.91997	8.66e-07	1.73e-05
ENSRNOG00000002820	LOC24906	chr10:43664046-43672276	1464	50.0006	147.864	706.794	1008.93	467.004	2.78192	0.511348	5.44036	5.32e-08	1.68e-06
ENSRNOG00000008529	FOXS1	chr3:154809750-154810734	984	34.6158	95.8809	506.651	609.768	304.851	2.77811	0.498241	5.57584	2.46e-08	9.02e-07
ENSRNOG00000013304	ARG1	chr1:23005316-23017705	1441	77.5651	363.885	2701.93	1459.53	1130.29	2.77682	0.594439	4.67132	2.99e-06	5.02e-05
ENSRNOG00000030111	CYP11B2	chr7:115995491-116157536	2689	19.872	128.226	838.963	628.135	395.64	2.77669	0.627992	4.42154	9.8e-06	0.000136608
ENSRNOG00000000855	LST1	chr20:7249281-7252477	438	221.157	180.21	1188.27	1878.28	845.291	2.75846	0.36734	7.50929	5.94e-14	1.49e-11
ENSRNOG00000009919	IRG1	chr15:97100760-97109707	2124	37.18	25.4142	279.445	217.949	136.881	2.75256	0.45492	6.05066	1.44e-09	8.14e-08
ENSRNOG00000008816	GPNMB	chr4:143383025-143404102	2306	838.472	4329.66	35301.3	13983	13391.8	2.74206	0.624738	4.38914	1.14e-05	0.000154619
ENSRNOG00000020263	ATP1A3	chr1:83104724-83133845	3559	21.7951	58.9147	453.783	242.438	190.788	2.72475	0.552975	4.92744	8.33e-07	1.68e-05
ENSRNOG00000004610	LUM	chr7:38861406-38868210	1727	3857.74	7857.61	34768.8	56507.6	25115.1	2.72275	0.435098	6.25779	3.9e-10	2.71e-08
ENSRNOG00000017440	BGN	chr1:153067993-153080160	2434	4139.8	9276.18	49233.9	54274.3	28585	2.72071	0.426616	6.37743	1.8e-10	1.43e-08
ENSRNOG00000050586	STFA2L3	chr11:70524198-70566841	290	1.28207	39.2765	226.577	290.191	135.885	2.71472	0.762998	3.55796	0.000373739	0.00293808
ENSRNOG00000046462	EN1	chr13:41633974-41638104	951	0	2.31038	35.2453	17.1421	13.2437	2.70293	0.851974	3.17255	0.00151108	0.00949201
ENSRNOG00000011750	FAM180A	chr4:62567993-62583301	1573	31.4107	58.9147	361.893	334.271	192.366	2.70224	0.451805	5.98099	2.22e-09	1.16e-07
ENSRNOG00000049422	FCGR2A	chr13:95687141-95715880	1305	667.316	939.17	6264.22	5258.94	3215.5	2.69534	0.336963	7.99892	1.26e-15	5.79e-13
ENSRNOG00000009751	GPX7	chr5:131847355-131855200	1035	403.21	559.113	2835.36	4161.85	1942.2	2.69344	0.359357	7.49517	6.62e-14	1.63e-11
ENSRNOG00000031475	COL16A1	chr5:151976657-152030103	5241	935.268	2585.32	13035.7	14475.3	7586.2	2.69315	0.471904	5.70698	1.15e-08	4.75e-07
ENSRNOG00000015695	SULT5A1	chr19:66658232-66672599	1008	20.5131	24.259	144.757	209.378	97.3427	2.68809	0.484476	5.54845	2.88e-08	1.02e-06
ENSRNOG00000033879	CLEC7A	chr4:211859714-211870886	733	91.0268	441.283	2715.77	1886.85	1258.99	2.68337	0.585001	4.58694	4.5e-06	7.06e-05
ENSRNOG00000023148	COL11A1	chr2:234955505-235148332	6680	46.1544	792.461	4769.44	4379.8	2442.89	2.68093	0.718615	3.73069	0.000190959	0.00167673
ENSRNOG00000015588	NOL3	chr19:48100722-48102390	1533	104.489	153.64	906.936	950.161	517.265	2.68016	0.362025	7.40326	1.33e-13	3.02e-11
ENSRNOG00000010510	COL12A1	chr8:86584555-86698440	5796	1620.53	4952.3	23776.1	27781.2	14206.7	2.67528	0.49215	5.43589	5.45e-08	1.72e-06
ENSRNOG00000015941	FKBP10	chr10:88119326-88131454	2559	947.448	1784.77	9092.02	10817.9	5533.36	2.67198	0.392471	6.8081	9.89e-12	1.17e-09
ENSRNOG00000003929	PCDH19	chrX:104235046-104335006	4156	4.48724	5.77596	23.9164	96.7303	31.7395	2.66313	0.7523	3.53999	0.000400146	0.00311874
ENSRNOG00000012840	SPARC	chr10:40573517-40595276	2036	25500.3	54322.9	286795	296903	162307	2.65944	0.414496	6.41609	1.4e-10	1.16e-08
ENSRNOG00000011824	TRH	chr4:189148793-189151289	1360	6.41034	70.4667	432.384	336.719	206.955	2.64898	0.697454	3.79806	0.000145831	0.00133605
ENSRNOG00000008375	OLR1	chr4:211883404-211905489	3751	42.9493	252.987	1548.9	1041.99	707.982	2.64569	0.616775	4.28956	1.79e-05	0.000227962
ENSRNOG00000014964	HP	chr19:52921329-52925933	1250	126.284	281.867	1936.6	1117.91	850.192	2.63554	0.479282	5.49893	3.82e-08	1.28e-06
ENSRNOG00000029212	VCAN	chr2:18363889-18441931	11546	798.728	3335.04	17664.8	15377.7	9103.67	2.63189	0.549498	4.78963	1.67e-06	3.03e-05
ENSRNOG00000010208	TIMP1	chrX:2136353-2193641	765	2707.73	5505.64	22461.3	37345.2	16588.7	2.6288	0.437789	6.00471	1.92e-09	1.03e-07
ENSRNOG00000000825	FAM26E	chr20:29419770-29489157	1704	39.1031	102.812	525.532	546.098	296.949	2.62849	0.490024	5.36401	8.14e-08	2.42e-06
ENSRNOG00000011758	FKBP7	chr3:70095652-70107822	869	247.439	353.488	1749.05	2409.69	1162	2.627	0.360054	7.29615	2.96e-13	5.89e-11
ENSRNOG00000003357	COL3A1	chr9:51689491-51725414	4765	52984	97968.3	530219	523241	294738	2.62225	0.382522	6.85517	7.12e-12	9.18e-10
ENSRNOG00000019445	MSLN	chr10:14932447-14938109	2099	1190.4	1117.07	6510.31	8920	4330.63	2.61114	0.309914	8.42535	3.6e-17	2.62e-14
ENSRNOG00000018426	APOC1	chr1:81872116-81875399	401	17.9489	23.1038	183.15	126.117	85.8119	2.60863	0.510391	5.11105	3.2e-07	7.61e-06
ENSRNOG00000032472	GPR64	chrX:37251556-37325011	4606	8.97447	15.0175	116.435	79.5882	53.9322	2.60552	0.587499	4.43494	9.21e-06	0.000130001
ENSRNOG00000006926	ATP6V0D2	chr5:38499087-38547691	1299	1.28207	19.6382	116.435	116.321	61.8486	2.59517	0.748298	3.4681	0.000524145	0.00390349
ENSRNOG00000006741	PODNL1	chr19:36217275-36223427	1707	71.1548	161.727	786.725	877.919	464.106	2.594	0.451802	5.74144	9.39e-09	4e-07
ENSRNOG00000029501	HOGA1	chr1:268744341-268771456	1771	11.5386	18.4831	143.499	91.8326	64.9969	2.59205	0.561981	4.61234	3.98e-06	6.37e-05
ENSRNOG00000002802	CXCL1	chr14:18653038-18654811	926	71.1548	420.49	1541.35	2605.6	1130.74	2.5917	0.617813	4.19496	2.73e-05	0.000325073
ENSRNOG00000004517	IGF1	chr7:28528239-28602541	757	425.646	916.067	3789.5	5725.45	2649.7	2.59068	0.441097	5.87326	4.27e-09	2.09e-07
ENSRNOG00000046663	AABR06076168.1	chr13:95665414-95673365	876	39.7441	73.9322	560.778	276.722	233.931	2.5806	0.508917	5.07077	3.96e-07	9.16e-06
ENSRNOG00000016044	MAB21L3	chr2:223666826-223689474	3926	10.8976	19.6382	103.848	134.688	65.933	2.5779	0.55251	4.6658	3.07e-06	5.13e-05
ENSRNOG00000011946	PTN	chr4:64063953-64156273	1460	2468.62	3948.44	22609.2	20081.9	12026.8	2.57773	0.354759	7.26613	3.7e-13	6.71e-11
ENSRNOG00000047800	C5AR1	chr1:79452057-79458856	1746	291.67	472.473	2807.03	2305.61	1440	2.57452	0.372463	6.91215	4.77e-12	6.44e-10
ENSRNOG00000032317	AABR06065629.1	chr10:90308856-90309221	365	1.28207	1.15519	93.7776	1.22443	23.9897	2.5744	0.881923	2.91907	0.00351075	0.0189481
ENSRNOG00000010203	CLEC4E	chr4:223287985-223293143	725	6.41034	42.7421	295.179	154.279	122.305	2.57179	0.682374	3.76889	0.000163977	0.00147357
ENSRNOG00000020633	MCPT1L1	chr15:38499890-38790387	1016	102.565	42.7421	439.937	601.197	289.648	2.57107	0.477879	5.38016	7.44e-08	2.26e-06
ENSRNOG00000026306	CLEC5A	chr4:133598268-133607250	1394	1.28207	17.3279	136.575	66.1194	54.2781	2.56629	0.764539	3.35665	0.000788917	0.00548028
ENSRNOG00000000815	SMPDL3A	chr20:42510560-42532381	1661	999.372	1863.32	11337.7	8035.96	5453.54	2.56239	0.410288	6.24536	4.23e-10	2.88e-08
ENSRNOG00000019495	GBX2	chr9:96754121-96756543	1379	1.28207	8.08634	50.9798	48.9774	26.6508	2.55379	0.759031	3.36454	0.000766708	0.0053618
ENSRNOG00000000239	CCL7	chr10:69058108-69059959	807	199.362	317.678	1501.7	1917.46	961.738	2.55268	0.373986	6.82561	8.76e-12	1.07e-09
ENSRNOG00000010685	TBX18	chr8:94860115-94888125	4611	9.61551	50.8284	254.899	242.438	136.561	2.54904	0.619115	4.11723	3.83e-05	0.000431002
ENSRNOG00000015505	MFAP5	chr4:222339035-222361316	881	473.083	371.972	2212.9	3249.65	1539.53	2.54254	0.345779	7.35309	1.94e-13	4.17e-11
ENSRNOG00000026953	GPR88	chr2:237334864-237339419	4155	220.516	346.557	1935.34	1757.06	1043.22	2.54054	0.36222	7.01381	2.32e-12	3.63e-10
ENSRNOG00000004275	EGFL6	chrX:29823778-29881339	2476	5.7693	11.5519	64.8261	83.2615	40.5336	2.5391	0.628512	4.03987	5.35e-05	0.000571167
ENSRNOG00000007300	C1QTNF6	chr7:119734789-119741304	2308	626.29	964.585	5069.03	5170.79	2895.19	2.53699	0.34506	7.3523	1.95e-13	4.17e-11
ENSRNOG00000005158	SLC24A5	chr3:123859069-123913267	1635	0.641034	3.46557	28.9515	25.7131	14.4227	2.53655	0.807694	3.14048	0.00168673	0.0103281
ENSRNOG00000000536	MDGA1	chr20:10707849-10766161	3492	6.41034	9.24153	57.903	67.3439	34.2019	2.53546	0.639663	3.96374	7.38e-05	0.000755857
ENSRNOG00000019211	OLFML3	chr2:225643128-225645958	1758	695.522	1440.52	6434.78	7846.17	4013.14	2.53504	0.415182	6.10585	1.02e-09	6.13e-08
ENSRNOG00000027380	UPK1B	chr11:67555642-67586433	1773	73.0779	277.246	1525.62	1050.56	717.995	2.52464	0.552605	4.56862	4.91e-06	7.61e-05
ENSRNOG00000043193	SMIM1	chr5:174800869-174803561	453	17.3079	12.7071	90.0013	129.79	60.9936	2.52186	0.547874	4.60299	4.16e-06	6.61e-05
ENSRNOG00000020525	COL5A3	chr8:21842412-21887757	6052	689.752	2402.8	11380.4	10623.2	6144.71	2.52082	0.516974	4.8761	1.08e-06	2.1e-05
ENSRNOG00000037409	SCIMP	chr10:57162134-57170928	456	44.2313	84.329	514.833	352.637	244.328	2.51719	0.464528	5.41882	6e-08	1.87e-06
ENSRNOG00000006653	SLC38A4	chr7:138083408-138105509	1893	2.56414	13.8623	73.6375	77.1394	41.0776	2.51427	0.687033	3.6596	0.000252607	0.00212088
ENSRNOG00000048771	RGD1559482	chr10:103215404-103467735	741	232.054	429.731	2766.75	1635.84	1243.67	2.51416	0.441357	5.69643	1.22e-08	4.96e-07
ENSRNOG00000033734	TNNT2	chr13:57716336-57729180	1096	173.72	259.918	1168.13	1623.6	787.888	2.51348	0.375064	6.70146	2.06e-11	2.17e-09
ENSRNOG00000028624	KIF26B	chr13:101800842-102194975	7421	16.0258	78.553	376.369	359.984	203.395	2.5133	0.602992	4.16806	3.07e-05	0.000359444
ENSRNOG00000024870	ANKS1B	chr7:30922185-31772758	1005	0	0	20.1402	11.0199	7.58748	2.51075	0.8861	2.83348	0.00460436	0.0237338
ENSRNOG00000017560	MDK	chr3:87531939-87541584	721	374.364	577.596	2178.28	4096.96	1761.69	2.51037	0.419176	5.98882	2.11e-09	1.11e-07
ENSRNOG00000010181	CLEC4D	chr4:223270167-223282584	714	0.641034	6.93115	59.1617	31.8353	24.2945	2.50702	0.779048	3.21805	0.00129063	0.00826403
ENSRNOG00000030694	RNASE1L2	chr15:31957447-31959061	791	28.2055	197.538	984.35	833.84	500.66	2.50463	0.63683	3.93297	8.39e-05	0.000837715
ENSRNOG00000010666	WISP2	chr3:166397531-166408879	1734	28.8465	39.2765	185.038	273.049	128.388	2.50462	0.461736	5.42435	5.82e-08	1.82e-06
ENSRNOG00000020845	TYROBP	chr1:90031116-90034967	525	1051.3	1361.97	6882.9	8083.71	4249.5	2.50432	0.312358	8.01746	1.08e-15	5.24e-13
ENSRNOG00000002396	SERPINB8	chr13:33035660-33058451	2474	5.12827	9.24153	89.372	36.733	34.4165	2.50419	0.701073	3.57194	0.000354351	0.00282067
ENSRNOG00000003138	FCGR2A	chr13:93924703-94068497	1347	288.465	341.937	1997.02	1895.42	1107.11	2.50343	0.308569	8.11303	4.94e-16	2.57e-13
ENSRNOG00000003832	VASH2	chr13:114122603-114154107	3758	46.1544	99.3464	514.203	456.714	273.344	2.50336	0.45827	5.46262	4.69e-08	1.51e-06
ENSRNOG00000017819	CD14	chr18:29265352-29266946	1503	630.136	989.999	5012.38	5172.01	2888.66	2.50144	0.34936	7.16008	8.06e-13	1.37e-10
ENSRNOG00000027940	LPPR3	chr7:12711158-12963915	2407	56.411	85.4841	378.887	542.424	259.314	2.50116	0.418567	5.97553	2.29e-09	1.19e-07
ENSRNOG00000003538	ADAMTS4	chr13:94249861-94259351	3339	68.5906	196.382	884.279	934.243	509.643	2.49918	0.492517	5.07429	3.89e-07	9.04e-06
ENSRNOG00000020332	TNNT3	chr1:222561417-222578412	1074	78.2061	79.7082	387.069	633.032	287.356	2.49659	0.404829	6.16704	6.96e-10	4.45e-08
ENSRNOG00000002886	MYH10	chr10:55017313-55148294	7630	201.926	728.926	3902.16	2696.2	1847.04	2.49413	0.537851	4.6372	3.53e-06	5.77e-05
ENSRNOG00000012660	POSTN	chr2:163331261-163362444	3177	3703.25	5842.96	30134.1	29466	16927.6	2.4941	0.346751	7.19277	6.35e-13	1.1e-10
ENSRNOG00000018570	C1QTNF3	chr2:83741941-83764184	1920	139.745	255.297	1090.09	1461.97	719.969	2.49371	0.40898	6.0974	1.08e-09	6.41e-08
ENSRNOG00000019584	DLK1	chr6:142742284-142749166	1239	5.7693	12.7071	86.2251	64.895	41.6582	2.49355	0.633543	3.93588	8.29e-05	0.000829323
ENSRNOG00000033220	OAS1K	chr12:43140729-43194139	1436	48.0775	146.709	675.325	669.766	376.943	2.48543	0.512222	4.85226	1.22e-06	2.3e-05
ENSRNOG00000016177	SCARA3	chr15:48953959-48986864	3358	294.876	301.505	1892.55	1731.35	1033.64	2.48413	0.300864	8.25664	1.5e-16	8.47e-14
ENSRNOG00000010278	IL6	chr4:3095535-3100112	1045	12.8207	80.8634	266.857	493.447	208.13	2.4803	0.64973	3.81743	0.000134847	0.00124798
ENSRNOG00000051235	C2	chr20:6616010-6641139	2604	2205.16	1766.29	11660.9	12292.8	6831.33	2.47969	0.292105	8.48904	2.08e-17	1.79e-14
ENSRNOG00000020136	TGM1	chr15:38268113-38281590	2744	37.18	173.279	701.129	846.084	429.469	2.47968	0.582007	4.26056	2.04e-05	0.000252584
ENSRNOG00000009465	SFRP2	chr2:202136232-202143777	1976	528.853	523.302	3492.43	2863.95	1815.3	2.47637	0.305588	8.10364	5.33e-16	2.68e-13
ENSRNOG00000017416	PPIC	chr18:47585435-47598040	1353	679.496	1396.63	6308.28	6916.83	3743.31	2.47506	0.410134	6.03476	1.59e-09	8.85e-08
ENSRNOG00000006030	PTPRZ1	chr4:49730551-49927326	7854	16.0258	39.2765	144.128	249.785	109.489	2.47479	0.557755	4.43707	9.12e-06	0.000128908
ENSRNOG00000022839	IFIT3	chr1:260127718-260132858	2036	58.3341	265.694	1053.58	1300.35	654.531	2.47244	0.574592	4.30295	1.69e-05	0.000216314
ENSRNOG00000005621	GXYLT2	chr4:197660978-197744356	1335	9.61551	15.0175	81.8194	99.1792	50.3345	2.47126	0.572618	4.31572	1.59e-05	0.000206352
ENSRNOG00000024330	NGP	chr8:118006027-118009392	1099	1.28207	9.24153	37.7628	68.5683	28.4907	2.47036	0.771071	3.2038	0.00135627	0.00861986
ENSRNOG00000046660	LOC691984	chr15:105608519-106607780	596	17.9489	30.035	154.827	164.074	89.7816	2.45459	0.496275	4.94603	7.57e-07	1.56e-05
ENSRNOG00000047491	TRO	chrX:23502764-23511033	4014	14.1027	34.6557	169.303	170.196	94.9532	2.45445	0.542058	4.52803	5.95e-06	8.97e-05
ENSRNOG00000014142	OGFRL1	chr9:28469366-28483091	1708	221.798	395.075	1847.86	1966.44	1084.28	2.45364	0.384874	6.37519	1.83e-10	1.43e-08
ENSRNOG00000013748	TREM3	chr9:13635293-13645452	893	11.5386	33.5005	176.226	149.381	90.8912	2.45076	0.56694	4.32279	1.54e-05	0.000200744
ENSRNOG00000046981	GP1BB	chr11:89621048-89622160	881	23.0772	36.9661	149.163	253.458	112.683	2.45006	0.506958	4.83286	1.35e-06	2.51e-05
ENSRNOG00000017959	CCDC37	chr4:186855628-186870548	1773	17.3079	13.8623	91.8895	121.219	59.5802	2.44927	0.539454	4.54029	5.62e-06	8.58e-05
ENSRNOG00000018087	VIM	chr17:82500857-82509377	1830	8848.19	13895.8	68209.1	68743.4	39092.8	2.44497	0.344615	7.09477	1.3e-12	2.1e-10
ENSRNOG00000026604	CERCAM	chr3:13774536-13788191	2543	336.543	419.334	1988.21	2513.76	1285.19	2.44017	0.324626	7.51685	5.61e-14	1.43e-11
ENSRNOG00000008586	ALDH1L2	chr7:26506320-26555206	3523	142.31	440.128	2131.71	1715.43	1085.71	2.43815	0.506304	4.81558	1.47e-06	2.72e-05
ENSRNOG00000014987	MDFI	chr9:14090318-14108948	1616	110.258	115.519	534.973	844.86	391.935	2.43672	0.383067	6.36109	2e-10	1.54e-08
ENSRNOG00000028259	MCEMP1	chr12:4375802-4379100	1151	212.823	495.577	2157.51	2319.08	1269.01	2.43672	0.4422	5.51044	3.58e-08	1.22e-06
ENSRNOG00000038616	COX6B2	chr1:75873173-75874397	470	56.411	41.5869	198.884	445.694	180.871	2.43629	0.49911	4.88127	1.05e-06	2.06e-05
ENSRNOG00000046848	PCOLCE2	chr8:102910333-102934915	1505	33.9748	125.916	530.567	569.362	308.281	2.43578	0.549892	4.42957	9.44e-06	0.000132509
ENSRNOG00000003887	LGI2	chr14:60876467-60903945	1753	14.1027	23.1038	100.071	153.054	70.7714	2.43166	0.546101	4.45277	8.48e-06	0.000121418
ENSRNOG00000001254	COL6A2	chr20:14931525-14959214	3601	12109.8	22078	98357	108304	58929.5	2.4259	0.379914	6.38541	1.71e-10	1.37e-08
ENSRNOG00000048935	TMEM45A	chr11:49896389-49961485	1574	75.001	158.261	645.744	811.8	413.371	2.42171	0.444187	5.45201	4.98e-08	1.59e-06
ENSRNOG00000016831	SERPINH1	chr1:170503595-170510775	1924	6325.72	12531.5	60060.5	54264.5	32627.9	2.41638	0.401211	6.02271	1.72e-09	9.46e-08
ENSRNOG00000037455	FAM9B	chrX:74309303-74321475	729	0	0	30.8396	4.89774	8.86732	2.41607	0.885914	2.72721	0.00638724	0.0309215
ENSRNOG00000037563	CD68	chr10:56014364-56016243	1199	842.318	1072.02	6608.49	4644.28	3230.13	2.41415	0.348466	6.92794	4.27e-12	5.98e-10
ENSRNOG00000050229	LOC100360124	chr15:9794006-9962274	1556	0	2.31038	15.1051	26.9376	10.6985	2.41375	0.864065	2.79348	0.00521448	0.0262083
ENSRNOG00000016701	GNG8	chr1:80067666-80069629	552	94.873	101.657	426.72	777.516	341.862	2.41207	0.417803	5.77322	7.78e-09	3.39e-07
ENSRNOG00000006664	CDKN2A	chr5:111793601-111801220	490	0.641034	2.31038	21.3989	22.0398	11.2308	2.41002	0.833674	2.89084	0.00384213	0.0204256
ENSRNOG00000000017	STEAP1	chr4:25343968-25354487	1210	53.2058	106.278	466.371	516.711	279.392	2.40925	0.441399	5.45821	4.81e-08	1.55e-06
ENSRNOG00000050618	AABR06041255.1	chr5:175084093-175092801	2205	73.7189	94.7257	395.251	631.808	291.892	2.40912	0.410525	5.86839	4.4e-09	2.14e-07
ENSRNOG00000016571	NGF	chr2:224316240-224369656	1068	16.0258	38.1213	137.205	226.52	101.982	2.40081	0.555123	4.32482	1.53e-05	0.000199079
ENSRNOG00000050792	TNFAIP6	chr3:42649265-42663185	1263	147.438	456.3	1847.86	2015.42	1092.79	2.39952	0.50109	4.7886	1.68e-06	3.04e-05
ENSRNOG00000046231	CACNA1S	chr13:57945478-58018357	5720	1.9231	0	18.8814	20.8154	10.2393	2.39726	0.863231	2.77708	0.00548505	0.0272885
ENSRNOG00000010605	GSC	chr6:137350765-137352805	1158	3.20517	0	20.7695	28.162	12.6637	2.3968	0.850856	2.81693	0.00484858	0.0246878
ENSRNOG00000002794	SELP	chr13:87308477-87344163	3168	111.54	246.056	962.322	1229.33	623.119	2.39094	0.444869	5.37448	7.68e-08	2.31e-06
ENSRNOG00000009594	SNAI1	chr3:170425897-170430382	1594	230.772	418.179	1811.98	2028.89	1098.56	2.38992	0.389899	6.12958	8.81e-10	5.44e-08
ENSRNOG00000019138	CLEC11A	chr1:101355486-101358626	1925	83.9754	168.658	873.579	663.643	439.247	2.38971	0.442045	5.40604	6.44e-08	1.99e-06
ENSRNOG00000033256	LOC691141	chr8:22613206-22630263	1301	140.386	145.554	725.675	921.999	472.719	2.38835	0.336723	7.09292	1.31e-12	2.1e-10
ENSRNOG00000021260	PRND	chr3:131039402-131042596	2330	126.284	273.78	1457.64	994.241	699.931	2.38809	0.457826	5.21616	1.83e-07	4.77e-06
ENSRNOG00000038776	OSCAR	chr1:63173816-63180053	2029	87.1806	131.692	551.337	746.905	370.682	2.38719	0.395133	6.04147	1.53e-09	8.56e-08
ENSRNOG00000005971	GPR176	chr3:116588547-116686280	3639	119.873	259.918	1162.46	1135.05	655.545	2.3853	0.434791	5.48608	4.11e-08	1.36e-06
ENSRNOG00000017277	IGSF6	chr1:197883911-197936219	2232	230.772	403.162	2121.64	1615.03	1072.03	2.38211	0.398771	5.97363	2.32e-09	1.2e-07
ENSRNOG00000003950	LVRN	chr18:40527840-40601218	2970	5.12827	9.24153	54.1267	52.6507	29.6021	2.38002	0.66762	3.56494	0.000363943	0.00287972
ENSRNOG00000002365	ITM2A	chrX:78689820-78695786	1597	1489.12	2331.18	11478	10433.4	6304.08	2.37571	0.349644	6.79467	1.09e-11	1.26e-09
ENSRNOG00000002810	GFPT2	chr10:35051131-35097280	2992	264.106	319.988	1786.18	1523.2	954.066	2.37521	0.324329	7.32346	2.42e-13	5.03e-11
ENSRNOG00000016163	SLC1A3	chr2:79348444-79422645	3854	121.155	177.899	854.069	868.124	494.772	2.37327	0.361488	6.56528	5.19e-11	4.82e-09
ENSRNOG00000012280	PTX3	chr2:177231517-177513886	1924	128.207	688.494	2655.35	2922.72	1564.34	2.37306	0.591395	4.01264	6e-05	0.000629693
ENSRNOG00000018486	RGD1311084	chr3:14989205-14995422	1510	12.1796	4.62076	60.4205	66.1194	34.9388	2.37302	0.654776	3.62417	0.000289887	0.00238452
ENSRNOG00000010461	GPX8	chr2:63940889-63944583	1062	489.75	703.511	3024.17	3796.97	1959.65	2.37101	0.343359	6.90534	5.01e-12	6.69e-10
ENSRNOG00000009884	LGALS1	chr7:120144847-120147980	532	2578.88	3398.57	15689.8	17892.7	9678.53	2.36714	0.310601	7.62116	2.51e-14	7.79e-12
ENSRNOG00000018893	SFRP4	chr17:56095159-56105248	1897	271.157	88.9497	1148.62	1076.28	632.514	2.36706	0.497898	4.7541	1.99e-06	3.53e-05
ENSRNOG00000051321	RN50_X_0711.1	chrX:71095168-71095806	638	11.5386	11.5519	58.5323	106.526	46.3064	2.36647	0.604548	3.91445	9.06e-05	0.000893059
ENSRNOG00000021199	FCGR1A	chr2:217916295-217925213	1249	401.287	579.906	2641.51	2923.95	1602.03	2.36642	0.337068	7.02059	2.21e-12	3.5e-10
ENSRNOG00000014653	ARL11	chr15:45448922-45451069	1455	193.592	306.126	1538.2	1334.63	826.619	2.36596	0.369962	6.39514	1.6e-10	1.3e-08
ENSRNOG00000003348	RASD1	chr10:46087071-46088803	1595	83.9754	154.796	555.113	880.368	408.675	2.36536	0.443149	5.33762	9.42e-08	2.74e-06
ENSRNOG00000001249	COL6A1	chr20:14817562-14835866	3885	10850.1	20602.8	90256.9	92285.6	52393.4	2.36472	0.388535	6.08626	1.16e-09	6.76e-08
ENSRNOG00000007338	FBLN2	chr4:187651234-187690477	3666	156.412	587.992	3157.6	1714.21	1380.13	2.36311	0.563398	4.19439	2.74e-05	0.000325617
ENSRNOG00000011923	MGARP	chr2:159919902-159928045	1206	10.2565	8.08634	66.0849	59.9973	35.2428	2.35873	0.622378	3.78987	0.000150725	0.001374
ENSRNOG00000011365	EMB	chr2:68054519-68107903	1475	266.029	646.907	2922.21	2545.6	1563.85	2.35802	0.453311	5.20178	1.97e-07	5.13e-06
ENSRNOG00000013668	CAPG	chr4:165178008-165189797	1476	1592.97	1515.61	8045.99	9076.73	4949.47	2.35667	0.278722	8.45526	2.78e-17	2.25e-14
ENSRNOG00000006723	ITGA11	chr8:67356795-67412933	4606	162.182	419.334	1713.17	1796.24	1001.2	2.35617	0.465914	5.05709	4.26e-07	9.72e-06
ENSRNOG00000009225	COPZ2	chr10:84511732-84524391	915	494.878	717.374	2791.93	4123.89	1985.32	2.35352	0.366757	6.41712	1.39e-10	1.16e-08
ENSRNOG00000020206	CTSD	chr1:222436921-222448798	1989	4294.29	6017.39	31968.1	25803.7	16693	2.35265	0.336504	6.99146	2.72e-12	4.13e-10
ENSRNOG00000024257	IRGC	chr1:82554280-82557958	1706	5.7693	4.62076	57.2736	31.8353	24.5391	2.35129	0.713413	3.29583	0.000981312	0.00660213
ENSRNOG00000042327	MROH2B	chr2:73689261-73713626	1695	0	2.31038	12.5876	28.162	10.4439	2.34938	0.867945	2.70683	0.00679298	0.0324012
ENSRNOG00000009656	RSPO1	chr5:146755087-146776423	1705	44.8724	76.2426	358.117	350.188	203.005	2.34901	0.426457	5.50821	3.63e-08	1.23e-06
ENSRNOG00000007907	TMEM178A	chr6:3625174-3683554	1669	437.185	895.273	3683.76	4022.27	2212.01	2.34328	0.411179	5.69892	1.21e-08	4.92e-07
ENSRNOG00000024055	DMKN	chr1:90369375-90384906	1667	2.56414	0	21.3989	25.7131	12.1834	2.34116	0.853619	2.74263	0.0060949	0.0296838
ENSRNOG00000018358	NT5DC2	chr16:7141050-7149109	1797	136.54	218.331	969.245	1039.54	578.613	2.34115	0.372588	6.28346	3.31e-10	2.39e-08
ENSRNOG00000030726	ASGR2	chr10:56452188-56465315	1467	63.4623	39.2765	319.096	274.273	170.235	2.34045	0.433293	5.40153	6.61e-08	2.04e-06
ENSRNOG00000020196	SCGB1A1	chr1:232216739-232220289	463	3.8462	0	23.2871	33.0597	14.6078	2.34038	0.844207	2.77228	0.00556644	0.0275804
ENSRNOG00000039197	COL15A1	chr5:68988936-69056130	4870	2825.68	5829.09	25533.3	24193.6	14301.9	2.33682	0.409044	5.71289	1.11e-08	4.62e-07
ENSRNOG00000002428	LPAR4	chrX:78238141-78251630	4171	17.9489	39.2765	214.619	143.259	101.855	2.33658	0.540073	4.32642	1.52e-05	0.000198345
ENSRNOG00000002792	CXCL2	chr14:18640311-18642357	1104	16.0258	311.902	1794.36	961.181	757.325	2.33355	0.740022	3.15336	0.00161403	0.00997947
ENSRNOG00000049918	LRG1	chr9:9939359-9941597	1295	691.034	925.308	3872.57	5064.26	2579.78	2.33167	0.333274	6.99625	2.63e-12	4.03e-10
ENSRNOG00000004197	ASB12	chrX:65613513-65698971	1320	0	12.7071	59.7911	80.8127	37.5756	2.32618	0.811342	2.86708	0.00414281	0.0217563
ENSRNOG00000017945	SERF1	chr2:49505235-49511266	189	38.462	41.5869	198.255	264.478	132.442	2.32527	0.432463	5.37682	7.58e-08	2.29e-06
ENSRNOG00000009822	TLR2	chr2:202253256-202258683	2593	273.721	487.491	2351.36	1938.28	1238.17	2.32399	0.393072	5.91237	3.37e-09	1.7e-07
ENSRNOG00000032991	RUFY4	chr9:81169309-81186989	1692	2.56414	15.0175	94.407	50.2018	39.794	2.32374	0.72018	3.2266	0.00125269	0.00807073
ENSRNOG00000016102	EBF3	chr1:216447389-216565356	4843	92.9499	79.7082	467.629	486.1	275.828	2.31989	0.354392	6.54611	5.91e-11	5.44e-09
ENSRNOG00000008105	DMRTA2	chr5:133586292-133592040	2945	5.7693	9.24153	53.4973	53.8751	29.8439	2.3194	0.656763	3.53157	0.000413102	0.00320942
ENSRNOG00000005930	NNMT	chr8:51518447-51531215	1043	110.258	88.9497	450.007	663.643	320.625	2.31777	0.385579	6.01115	1.84e-09	1.01e-07
ENSRNOG00000031024	LOC100360575	chr2:96649147-96666717	1095	2.56414	3.46557	33.3571	24.4887	15.4298	2.31606	0.779734	2.97033	0.00297483	0.0165335
ENSRNOG00000046817	LOC690955	chr1:63066510-63073843	2639	741.035	1106.67	5191.76	4892.84	2923.42	2.31212	0.340153	6.7973	1.07e-11	1.24e-09
ENSRNOG00000015514	BCAT1	chr4:243444838-243491574	2463	356.415	735.857	3207.95	2969.25	1781.07	2.31093	0.415783	5.55801	2.73e-08	9.78e-07
ENSRNOG00000013794	RBP1	chr8:105891147-105912684	711	1592.97	1618.42	6802.97	10732.2	5065.23	2.3106	0.338866	6.81862	9.19e-12	1.12e-09
ENSRNOG00000004141	VASN	chr10:9866590-9909647	2739	212.823	335.005	1419.25	1601.56	873.363	2.31037	0.363392	6.35778	2.05e-10	1.56e-08
ENSRNOG00000005968	LOC100911443	chr4:146798159-146800436	1634	45.5134	57.7596	293.291	287.742	167.739	2.30536	0.402155	5.7325	9.9e-09	4.19e-07
ENSRNOG00000016687	SSC5D	chr1:76074529-76092319	4495	410.262	582.216	2560.95	2811.3	1557.62	2.30404	0.333134	6.91625	4.64e-12	6.37e-10
ENSRNOG00000030183	PLOD2	chr8:99462924-99545578	3609	851.293	2603.8	11926.1	8578.39	5879.66	2.3004	0.503717	4.56686	4.95e-06	7.66e-05
ENSRNOG00000049437	GPC1	chr9:99664179-99692723	3493	307.696	712.753	2959.34	2849.26	1672.91	2.29942	0.439556	5.23123	1.68e-07	4.46e-06
ENSRNOG00000003546	TNFRSF12A	chr10:12818948-12820979	967	137.181	347.713	1347.5	1455.85	805.111	2.29856	0.464891	4.94429	7.64e-07	1.57e-05
ENSRNOG00000050509	EBI3	chr9:10096037-10100007	1204	116.668	98.1912	687.912	489.774	341.727	2.29798	0.381546	6.02281	1.71e-09	9.46e-08
ENSRNOG00000016752	CRISPLD2	chr19:63411525-63452565	4037	755.779	2376.23	10630.9	7936.78	5324.15	2.29583	0.506506	4.53268	5.82e-06	8.83e-05
ENSRNOG00000033835	DNM1	chr3:16686950-16730913	3164	230.131	255.297	1123.44	1485.24	756.064	2.29551	0.329692	6.96259	3.34e-12	4.89e-10
ENSRNOG00000032728	LOC684499	chr11:70419285-70426584	294	1.9231	12.7071	51.6092	69.7927	33.454	2.2947	0.73542	3.12025	0.00180695	0.0109128
ENSRNOG00000008758	TSPAN18	chr3:88799484-88939055	3716	213.464	427.421	1849.75	1714.21	1030.12	2.29132	0.413705	5.53854	3.05e-08	1.06e-06
ENSRNOG00000004589	GALNT16	chr6:112246062-112422114	3857	136.54	114.364	689.171	655.072	390.619	2.28918	0.338968	6.75338	1.44e-11	1.59e-09
ENSRNOG00000004109	ZFPM2	chr7:79657648-79976680	4276	41.0262	87.7945	423.573	320.802	214.403	2.28859	0.479017	4.77769	1.77e-06	3.19e-05
ENSRNOG00000029768	CCL12	chr10:69111875-69113426	540	41.6672	65.8459	319.096	285.293	174.476	2.28706	0.429004	5.33108	9.76e-08	2.81e-06
ENSRNOG00000009073	TNNI1	chr13:57672835-57685255	1070	1.9231	2.31038	17.6226	26.9376	11.9384	2.28667	0.820589	2.78663	0.00532599	0.0266886
ENSRNOG00000003148	TIMP2	chr10:106973462-107021070	1661	2151.31	2840.61	10884.5	15937.2	7772.57	2.28415	0.344583	6.62872	3.39e-11	3.43e-09
ENSRNOG00000015036	CTGF	chr1:23331546-23334660	2333	680.137	3120.17	11948.8	11555	6688.07	2.284	0.563795	4.05112	5.1e-05	0.000551242
ENSRNOG00000051056	FNDC4	chr6:36207967-36209609	1420	87.1806	124.761	508.539	647.726	334.753	2.28298	0.383619	5.95115	2.66e-09	1.37e-07
ENSRNOG00000029330	CAR5B	chrX:32609746-32652918	1765	36.5389	65.8459	276.298	304.884	167.399	2.28094	0.448069	5.09059	3.57e-07	8.36e-06
ENSRNOG00000020587	EFEMP2	chr1:227783785-227790739	1386	963.474	1098.59	4586.29	6332.77	3172.56	2.279	0.319289	7.13774	9.49e-13	1.55e-10
ENSRNOG00000010832	PDGFRL	chr16:54098437-54161461	1467	176.925	241.435	1117.15	1108.11	647.321	2.27769	0.339888	6.70128	2.07e-11	2.17e-09
ENSRNOG00000001314	FAM20C	chr12:19906232-19965797	2959	276.927	474.784	2528.22	1612.58	1201.62	2.27756	0.417686	5.4528	4.96e-08	1.59e-06
ENSRNOG00000012779	MSR1	chr16:56517028-56597077	1431	52.5648	70.4667	635.674	145.708	223.251	2.27593	0.607981	3.74342	0.000181535	0.00160852
ENSRNOG00000017625	HTR2B	chr9:92810406-92884819	1973	104.489	137.468	702.388	591.402	376.068	2.27569	0.365108	6.23293	4.58e-10	3.09e-08
ENSRNOG00000003969	FAM20A	chr10:97677359-97731346	1626	56.411	95.8809	387.069	454.265	242.946	2.27515	0.421604	5.39642	6.8e-08	2.09e-06
ENSRNOG00000018949	DLK2	chr9:15938027-15962277	1441	3.8462	8.08634	35.2453	56.324	25.1215	2.27492	0.710934	3.1999	0.00137474	0.00872969
ENSRNOG00000008885	CHST11	chr7:26770954-26981219	1989	21.7951	67.0011	259.305	275.498	152.509	2.26989	0.542394	4.18496	2.85e-05	0.000336567
ENSRNOG00000029141	TRABD2B	chr5:137017121-137214659	1551	7.69241	5.77596	64.1968	35.5086	27.9817	2.26394	0.690005	3.28105	0.0010342	0.00687685
ENSRNOG00000020355	TWIST2	chr9:98599200-98642827	1183	34.6158	30.035	163.639	197.134	104.164	2.26064	0.449863	5.02517	5.03e-07	1.11e-05
ENSRNOG00000017469	ANXA1	chr1:245192876-245208910	1402	1729.51	2529.87	11411.9	10915.8	6514.08	2.2606	0.331789	6.81335	9.53e-12	1.14e-09
ENSRNOG00000017118	P4HA3	chr1:171496701-171531029	1660	8.33344	157.106	869.174	444.47	363.227	2.25828	0.745869	3.02772	0.00246402	0.0141984
ENSRNOG00000018812	RPP25	chr8:62060879-62062260	1381	110.899	176.744	633.156	928.121	451.779	2.25656	0.406023	5.55771	2.73e-08	9.78e-07
ENSRNOG00000007538	LEPRE1	chr5:142091633-142106916	2519	455.775	899.894	3620.82	3679.42	2120.07	2.25219	0.402678	5.59303	2.23e-08	8.25e-07
ENSRNOG00000001262	SPATC1L	chr20:15309077-15366940	1277	1.9231	5.77596	12.5876	69.7927	22.0382	2.25106	0.815531	2.76024	0.00577588	0.0284343
ENSRNOG00000005008	ANGPT4	chr3:153772189-153805765	2328	30.1286	58.9147	224.059	276.722	144.302	2.2506	0.478599	4.70249	2.57e-06	4.4e-05
ENSRNOG00000032339	RASL12	chr8:70607874-70622101	2440	217.951	277.246	1169.39	1406.87	751.289	2.24896	0.332062	6.7727	1.26e-11	1.44e-09
ENSRNOG00000008680	LOXL1	chr8:62843790-62868157	2450	1167.96	1051.22	5332.74	5994.83	3315.05	2.24798	0.283996	7.91552	2.46e-15	9.96e-13
ENSRNOG00000022101	LOC100911902	chr2:206725432-206729806	799	45.5134	43.8973	229.724	253.458	140.213	2.24614	0.408628	5.4968	3.87e-08	1.29e-06
ENSRNOG00000002154	MEPE	chr14:6770083-6781630	1655	0	1.15519	10.6995	18.3665	7.29531	2.24362	0.881655	2.54478	0.0109346	0.0481223
ENSRNOG00000010549	TSPO	chr7:124449358-124459089	841	958.987	1323.85	5114.97	6750.31	3459.42	2.24241	0.33818	6.63082	3.34e-11	3.4e-09
ENSRNOG00000013074	WT1	chr3:101756492-101802591	2570	150.002	269.16	1304.7	945.263	655.038	2.24235	0.417201	5.37476	7.67e-08	2.31e-06
ENSRNOG00000013925	NOX4	chr1:157106651-157285107	2176	9.61551	6.93115	72.3787	41.6308	32.1519	2.23903	0.665138	3.36627	0.00076193	0.00533864
ENSRNOG00000016071	LEPREL2	chr4:224377007-224390639	2024	775.651	954.188	3832.29	5042.22	2592.86	2.23392	0.320876	6.96196	3.36e-12	4.89e-10
ENSRNOG00000051216	RN50_X_0663.2	chrX:66205957-66206785	728	146.156	137.468	643.226	814.249	425.478	2.23103	0.339459	6.57231	4.95e-11	4.72e-09
ENSRNOG00000028856	PKNOX2	chr8:39364259-39554742	1639	112.181	152.485	723.158	645.277	400.013	2.2295	0.360985	6.17617	6.57e-10	4.23e-08
ENSRNOG00000018566	CTSL	chr17:1861403-1867575	1383	3474.4	4874.91	24331.2	18568.5	12573.8	2.22832	0.345038	6.45818	1.06e-10	9.08e-09
ENSRNOG00000000142	PLXDC2	chr17:84957326-85343868	2735	582.7	718.529	3415.02	3183.53	1936.11	2.22772	0.306635	7.26506	3.73e-13	6.71e-11
ENSRNOG00000042029	EFS	chr15:37466898-37476240	2487	145.515	174.434	730.081	913.428	480.124	2.22474	0.342141	6.50241	7.9e-11	7.06e-09
ENSRNOG00000022772	PRICKLE1	chr7:134370194-134389446	4485	221.157	682.718	2394.16	2665.59	1459.98	2.22377	0.498967	4.45675	8.32e-06	0.000119658
ENSRNOG00000009227	APLNR	chr3:79052119-79055764	3645	416.031	574.13	2038.56	3096.59	1496.66	2.22248	0.36641	6.06556	1.31e-09	7.51e-08
ENSRNOG00000003720	PRRX1	chr13:86039712-86107193	1364	10.8976	63.5355	315.319	176.319	139.09	2.22198	0.658084	3.37644	0.000734299	0.0051674
ENSRNOG00000003486	MNDA	chr13:96588440-96604826	1595	488.468	492.111	2491.72	2420.71	1443.57	2.22154	0.288202	7.70828	1.28e-14	4.22e-12
ENSRNOG00000001580	HOXD9	chr3:68086881-68088227	999	22.4362	16.1727	89.372	128.566	62.5101	2.21667	0.539728	4.10701	4.01e-05	0.000447063
ENSRNOG00000020936	NRADD	chr8:118231774-118234748	871	57.693	79.7082	319.096	404.063	210.574	2.21444	0.403024	5.49456	3.92e-08	1.3e-06
ENSRNOG00000006682	NAV3	chr7:52215844-52510816	5076	0.641034	1.15519	22.6577	9.79547	8.59127	2.21406	0.86751	2.5522	0.0107045	0.0472521
ENSRNOG00000000805	GJA1	chr20:39612107-39624547	3127	1254.5	3043.93	12090.4	10918.3	6693.71	2.21238	0.44676	4.95205	7.34e-07	1.52e-05
ENSRNOG00000019955	OGDHL	chr16:8417212-8439689	3554	37.18	45.0525	196.996	237.54	126.462	2.2122	0.431139	5.13107	2.88e-07	6.97e-06
ENSRNOG00000021499	SIGLECH	chr1:115055394-115156174	507	4.48724	11.5519	49.721	59.9973	30.8034	2.20953	0.690727	3.19885	0.00137978	0.00875334
ENSRNOG00000007475	GPIHBP1	chr7:116525712-116527500	820	264.747	139.778	847.775	1286.88	620.14	2.2092	0.426595	5.17868	2.23e-07	5.69e-06
ENSRNOG00000014956	SLC11A1	chr9:81285097-81442524	1988	181.413	221.797	1190.79	862.002	602.747	2.20803	0.361907	6.10109	1.05e-09	6.29e-08
ENSRNOG00000046121	IGSF7	chr10:103215404-103467735	642	105.771	242.59	913.23	953.834	542.718	2.20795	0.44975	4.90927	9.14e-07	1.81e-05
ENSRNOG00000018943	TNNC1	chr16:7220776-7223907	663	19.872	19.6382	80.5606	149.381	65.8473	2.20252	0.552355	3.98751	6.68e-05	0.000692267
ENSRNOG00000015787	LEPREL4	chr10:88112063-88118573	1407	254.49	457.456	1708.77	1960.32	1072.11	2.20206	0.389942	5.64715	1.63e-08	6.35e-07
ENSRNOG00000006759	ANKRD24	chr7:11086845-11105541	3472	82.6934	80.8634	363.782	475.08	245.229	2.20205	0.373618	5.89385	3.77e-09	1.87e-07
ENSRNOG00000009878	LOC102555086	chr8:121695470-121715051	1006	899.37	1338.87	5364.21	5898.1	3305.29	2.19928	0.33786	6.50944	7.54e-11	6.78e-09
ENSRNOG00000020606	B3GNT8	chr1:83681451-83684351	1812	33.9748	53.1388	178.744	292.64	136.492	2.19864	0.480163	4.57894	4.67e-06	7.29e-05
ENSRNOG00000031286	SPIN2A	chrX:18730381-18732361	1337	5.7693	8.08634	38.3922	56.324	26.3615	2.1975	0.682578	3.21941	0.00128454	0.00823224
ENSRNOG00000024243	CADM4	chr1:82625737-82630379	1106	24.3593	131.692	656.443	319.577	278.436	2.19679	0.641146	3.42634	0.00061177	0.00443145
ENSRNOG00000005700	NSG1	chr14:77362123-77383868	1613	192.31	456.3	1618.77	1819.51	1000.54	2.1965	0.449574	4.88573	1.03e-06	2.02e-05
ENSRNOG00000015257	CORO2B	chr8:67107333-67177186	3313	92.9499	138.623	588.47	593.851	346.361	2.19479	0.377143	5.81951	5.9e-09	2.7e-07
ENSRNOG00000051098	RN50_10_0890.4	chr10:88965630-89008424	361	229.49	175.589	681.618	1449.73	618.364	2.19459	0.437161	5.0201	5.16e-07	1.13e-05
ENSRNOG00000047730	TNFSF14	chr9:8768723-8772374	720	2.56414	5.77596	23.2871	48.9774	19.7181	2.19443	0.762614	2.87751	0.00400821	0.0211926
ENSRNOG00000019890	FOLR2	chr1:173104847-173110514	1041	566.674	566.044	3065.08	2529.68	1649.84	2.19441	0.305137	7.19155	6.41e-13	1.1e-10
ENSRNOG00000048220	CLEC12A	chr4:211756067-211770832	843	57.693	120.14	653.926	323.251	284.093	2.19312	0.513504	4.27089	1.95e-05	0.000243344
ENSRNOG00000018390	PLD3	chr1:85556093-85567834	1846	1161.55	1182.92	6170.44	5343.43	3397.4	2.19225	0.29073	7.54051	4.68e-14	1.26e-11
ENSRNOG00000018254	SNCAIP	chr18:46954705-47092054	3803	64.7444	127.071	551.337	456.714	294.308	2.1916	0.4421	4.95724	7.15e-07	1.48e-05
ENSRNOG00000049425	FAM167B	chr5:151512150-151513395	489	56.411	72.777	254.269	424.879	197.272	2.19155	0.440243	4.97804	6.42e-07	1.35e-05
ENSRNOG00000014143	COL24A1	chr2:269728155-269962702	4050	24.3593	73.9322	436.16	155.503	169.979	2.18918	0.619984	3.53102	0.000413957	0.00321263
ENSRNOG00000047178	AABR06038420.1	chr5:108355622-108454299	477	5.12827	4.62076	50.9798	24.4887	20.8854	2.18561	0.746083	2.92944	0.00339574	0.0184161
ENSRNOG00000016413	PSTPIP1	chr8:59330961-59369982	1545	439.108	406.627	1900.73	2246.84	1221.93	2.18391	0.29911	7.30134	2.85e-13	5.8e-11
ENSRNOG00000020867	NUMBL	chr1:85278880-85302554	2712	253.208	330.385	1414.85	1465.65	848.416	2.18195	0.32518	6.70997	1.95e-11	2.07e-09
ENSRNOG00000002382	LOC100911714	chr10:47538039-47540977	1483	2075.03	2832.53	9219.79	15622.6	7264.69	2.18139	0.376686	5.791	7e-09	3.13e-07
ENSRNOG00000017427	PFN2	chr2:167261839-167446313	1950	189.746	358.109	1326.1	1470.55	818.999	2.18032	0.400472	5.44438	5.2e-08	1.65e-06
ENSRNOG00000021855	KCP	chr4:56527380-56553915	3780	18.59	26.5694	143.499	107.75	72.858	2.17673	0.519133	4.19302	2.75e-05	0.000326537
ENSRNOG00000009636	SCRN1	chr4:149342035-149400634	1515	57.693	87.7945	363.782	378.35	217.484	2.17397	0.403794	5.38386	7.29e-08	2.23e-06
ENSRNOG00000046699	SLPI	chr3:166981038-166983491	418	1717.97	3429.76	11520.8	14761.8	7689.13	2.17319	0.409076	5.31244	1.08e-07	3.07e-06
ENSRNOG00000020579	COL7A1	chr8:117046350-117078589	9170	97.4371	211.4	713.717	891.388	468.041	2.17296	0.447508	4.85569	1.2e-06	2.28e-05
ENSRNOG00000010694	TPBG	chr8:93006541-93009911	2333	176.284	143.244	720.011	850.982	462.394	2.17191	0.337346	6.43825	1.21e-10	1.02e-08
ENSRNOG00000005094	C1QTNF7	chr14:72037996-72148187	1660	113.463	138.623	549.449	705.274	368.347	2.17128	0.359593	6.03815	1.56e-09	8.7e-08
ENSRNOG00000007250	SIX4	chr6:105420179-105433841	5970	3.8462	8.08634	46.5741	35.5086	23.2872	2.1689	0.714502	3.03554	0.00240105	0.013907
ENSRNOG00000033663	P4HA2	chr10:39214790-39243698	2315	528.212	691.959	2907.11	3029.25	1752.74	2.16532	0.314784	6.87876	6.04e-12	7.85e-10
ENSRNOG00000015357	BMPER	chr8:24409997-24655248	3785	191.669	411.248	1654.01	1424.02	902.737	2.16008	0.432549	4.99384	5.92e-07	1.26e-05
ENSRNOG00000020482	NFATC4	chr15:38381668-38390744	3170	239.106	269.16	991.903	1495.03	731.849	2.15031	0.354763	6.06126	1.35e-09	7.66e-08
ENSRNOG00000045998	SEMA6B	chr9:9928559-9938199	3847	142.951	199.848	850.922	822.82	494.268	2.15029	0.353091	6.08989	1.13e-09	6.66e-08
ENSRNOG00000048420	AABR06070908.1	chr12:22346646-22702124	1229	11.5386	31.1902	129.023	112.648	69.8648	2.14851	0.577888	3.71787	0.000200906	0.00174827
ENSRNOG00000006553	BNC2	chr5:106424109-106751748	4091	32.0517	48.518	213.989	199.583	121.309	2.14689	0.45301	4.73917	2.15e-06	3.76e-05
ENSRNOG00000024115	C6	chr2:73494911-73547355	2295	158.335	298.039	1574.08	771.394	689.115	2.13804	0.480454	4.45005	8.59e-06	0.000122488
ENSRNOG00000016255	PODXL2	chr4:186026103-186057984	2075	120.514	122.45	518.609	655.072	346.615	2.13802	0.347909	6.14534	7.98e-10	5.03e-08
ENSRNOG00000022640	SIGLEC8	chr1:100647306-100655905	1383	24.3593	58.9147	279.445	170.196	130.718	2.13698	0.547209	3.90523	9.41e-05	0.000921546
ENSRNOG00000033532	EDDM3B	chr15:31880763-31881956	1193	14.1027	11.5519	56.0148	93.057	42.701	2.13633	0.603346	3.54081	0.000398906	0.00311154
ENSRNOG00000007545	ANGPTL4	chr7:18805415-18811643	1844	605.136	635.355	2693.75	3171.28	1738.91	2.13557	0.293131	7.28535	3.21e-13	6.21e-11
ENSRNOG00000008749	COL5A1	chr3:11789102-11935751	5549	839.754	3372	14875.4	8246.56	6721.03	2.13426	0.566374	3.76828	0.000164375	0.00147532
ENSRNOG00000013615	DNTT	chr1:267732289-267763835	1825	5.12827	4.62076	37.7628	30.6109	19.351	2.13168	0.729488	2.92216	0.00347615	0.0188032
ENSRNOG00000027542	LOC100302465	chr1:213272093-213306797	1609	0.641034	4.62076	30.8396	23.2642	14.7029	2.12969	0.8133	2.61858	0.00882962	0.0403961
ENSRNOG00000014170	DBN1	chr17:11788596-11802569	2541	476.288	672.321	2737.8	2729.26	1620.9	2.12771	0.330594	6.43604	1.23e-10	1.03e-08
ENSRNOG00000016769	RAB38	chr1:158385877-158466622	1406	77.5651	86.6393	409.097	385.697	235.261	2.12705	0.365176	5.82474	5.72e-09	2.65e-07
ENSRNOG00000018865	ADAMTS12	chr2:83352797-83650251	8571	242.311	386.989	1526.88	1506.05	897.397	2.12618	0.36483	5.82787	5.61e-09	2.6e-07
ENSRNOG00000037661	TMSBL1	chrX:107491613-107493728	413	89.1037	73.9322	324.131	473.856	234.82	2.12605	0.398245	5.33856	9.37e-08	2.73e-06
ENSRNOG00000020401	ADCY4	chr15:38342435-38358253	3415	162.182	218.331	858.474	958.732	537.938	2.12532	0.344507	6.16915	6.87e-10	4.41e-08
ENSRNOG00000004290	GRB10	chr14:91818382-91914861	4996	572.443	1022.34	4008.52	3725.95	2287.06	2.1249	0.381927	5.56363	2.64e-08	9.57e-07
ENSRNOG00000005478	FKBP9	chr4:151819738-151885185	3002	884.627	1581.46	5899.18	6030.34	3527.02	2.12209	0.377811	5.61682	1.95e-08	7.44e-07
ENSRNOG00000011714	SAT2	chr10:55965503-55982854	794	135.899	134.002	524.903	775.067	383.682	2.12079	0.367884	5.76484	8.17e-09	3.54e-07
ENSRNOG00000019270	P2RY6	chr1:172169438-172194750	2465	169.874	264.539	988.756	1104.44	619.032	2.12036	0.367861	5.76402	8.21e-09	3.55e-07
ENSRNOG00000022429	RGD1312005	chr18:53346500-53361030	1968	12.1796	13.8623	62.3086	83.2615	41.7916	2.12026	0.589933	3.59407	0.000325547	0.00262874
ENSRNOG00000027520	PLS3	chrX:119173342-119266228	3071	832.703	1732.79	7020.73	5600.56	3727	2.11825	0.422137	5.01791	5.22e-07	1.14e-05
ENSRNOG00000014505	PMFBP1	chr19:52957680-53005895	3302	60.2572	56.6044	363.782	215.5	171.244	2.11449	0.450243	4.69634	2.65e-06	4.51e-05
ENSRNOG00000038821	LILRB3L	chr1:62834636-62841320	2098	47.4365	72.777	433.643	188.563	182.883	2.11362	0.522704	4.04363	5.26e-05	0.000565852
ENSRNOG00000001252	CHST12	chr12:18193613-18194873	1260	120.514	165.192	667.772	691.805	403.225	2.11276	0.354976	5.95184	2.65e-09	1.37e-07
ENSRNOG00000024705	RARRES2	chr4:142850800-142872500	727	1824.38	1562.97	5579.45	10805.6	4823.9	2.11269	0.389426	5.42514	5.79e-08	1.82e-06
ENSRNOG00000022242	CXCL9	chr14:17145005-17150876	1170	398.723	134.002	881.132	1929.71	814.541	2.10989	0.53974	3.90909	9.26e-05	0.000910629
ENSRNOG00000021962	FZD2	chr10:90343132-90345043	1911	137.181	218.331	730.081	983.221	505.819	2.10815	0.391677	5.38237	7.35e-08	2.24e-06
ENSRNOG00000018827	HTR7	chr1:261758784-261879737	1525	19.872	47.3628	193.849	156.728	102.544	2.10632	0.534496	3.94075	8.12e-05	0.000815136
ENSRNOG00000010661	GZMK	chr2:64101924-64109992	882	7.69241	3.46557	37.1334	37.9575	21.0256	2.105	0.736252	2.85907	0.00424882	0.0221758
ENSRNOG00000004516	ITGBL1	chr15:113495870-113759207	2288	109.617	84.329	485.252	434.674	273.032	2.1048	0.369826	5.69133	1.26e-08	5.08e-07
ENSRNOG00000048673	SLFN3	chr10:70042619-70069233	4857	637.829	1590.7	4741.75	6390.32	3268.33	2.10449	0.460501	4.57	4.88e-06	7.57e-05
ENSRNOG00000014149	NPY1R	chr16:24663044-24671859	2618	19.231	62.3803	247.976	188.563	127.127	2.103	0.572025	3.67641	0.000236542	0.00200215
ENSRNOG00000002097	RASL11B	chr14:36378165-36382381	1810	150.002	302.66	790.501	1481.57	665.454	2.10168	0.469262	4.4787	7.51e-06	0.000109178
ENSRNOG00000008939	NXPH1	chr4:35136612-35138564	1952	3.8462	13.8623	64.8261	48.9774	32.3778	2.10125	0.699796	3.00266	0.00267632	0.0151519
ENSRNOG00000047446	FOXC2	chr19:63788036-63790739	2703	10.2565	12.7071	57.2736	72.2416	37.1629	2.10114	0.610024	3.44436	0.000572421	0.00418387
ENSRNOG00000008765	ZFHX4	chr2:118157859-118345227	13927	26.2824	47.3628	209.584	160.401	108.715	2.0998	0.49755	4.22028	2.44e-05	0.000294715
ENSRNOG00000033793	LOC497796	chr4:212834038-212860634	963	29.4876	60.0699	242.311	208.154	132.19	2.09944	0.492549	4.2624	2.02e-05	0.000250946
ENSRNOG00000015949	AQP9	chr8:75483005-75523420	1715	25.6414	30.035	150.422	129.79	82.3735	2.09839	0.478776	4.38282	1.17e-05	0.000158165
ENSRNOG00000007955	TIMP4	chr4:210326339-210483842	1701	30.1286	24.259	135.317	134.688	79.3428	2.09691	0.480655	4.36261	1.29e-05	0.000171413
ENSRNOG00000023397	LOC100911104	chr14:22767471-22771288	854	398.723	314.212	1426.8	1897.87	987.419	2.09677	0.33438	6.27063	3.6e-10	2.55e-08
ENSRNOG00000003018	OLFML2B	chr13:93609912-93647084	3122	497.442	1016.57	3651.03	3650.04	2160.33	2.09676	0.410842	5.10357	3.33e-07	7.87e-06
ENSRNOG00000010890	BMP1	chr15:55889917-55934263	3647	1027.58	1494.82	5649.31	6098.91	3495.61	2.09489	0.331762	6.31445	2.71e-10	1.99e-08
ENSRNOG00000037076	LOC689757	chr4:227379692-227427294	884	9.61551	16.1727	90.6307	55.0995	42.2486	2.09206	0.62209	3.36295	0.00077113	0.00538755
ENSRNOG00000019244	MXRA8	chr5:176764183-176768533	2267	918.601	1338.87	5004.83	5494.04	3124.48	2.09198	0.333253	6.27746	3.44e-10	2.47e-08
ENSRNOG00000007613	C1QTNF5	chr8:47059595-47061466	1335	505.135	583.372	2102.13	2949.66	1501.38	2.09044	0.330018	6.33433	2.38e-10	1.79e-08
ENSRNOG00000028185	TSTD3	chr5:40549090-40558531	1510	212.823	235.659	1003.23	1059.14	615.062	2.08644	0.312596	6.67457	2.48e-11	2.54e-09
ENSRNOG00000016058	KAZALD1	chr1:272270127-272273540	1622	45.5134	56.6044	246.088	244.887	145.537	2.08336	0.410881	5.07047	3.97e-07	9.16e-06
ENSRNOG00000008045	SLAMF9	chr13:95381995-95384776	1125	322.44	391.61	1886.25	1408.1	983.839	2.08047	0.344097	6.04616	1.48e-09	8.34e-08
ENSRNOG00000019363	FAM212A	chr8:116117471-116119162	1062	26.9234	16.1727	84.9663	139.585	65.4071	2.07871	0.557996	3.72532	0.000195071	0.0017077
ENSRNOG00000010905	DLX5	chr4:32255322-32259589	1390	2.56414	3.46557	19.5108	28.162	13.1751	2.07856	0.797163	2.60744	0.00912208	0.0415254
ENSRNOG00000024159	FCER1G	chr13:94228760-94233191	631	2296.18	2335.8	9523.78	11427.6	6261.96	2.07654	0.28444	7.30046	2.87e-13	5.8e-11
ENSRNOG00000004258	CHST7	chrX:3413405-3449646	2305	23.7183	21.9486	104.477	126.117	67.5151	2.07458	0.503585	4.11963	3.79e-05	0.000427525
ENSRNOG00000015052	STAR	chr16:70698592-70705478	3396	87.8216	123.605	422.943	575.484	295.952	2.07391	0.39324	5.27389	1.34e-07	3.69e-06
ENSRNOG00000034303	SPON1	chr1:185603829-185902799	4097	1140.4	2175.22	8946.64	6692.76	4653.77	2.07118	0.409329	5.05993	4.19e-07	9.61e-06
ENSRNOG00000020247	CNIH2	chr1:227401142-227411186	1329	17.9489	33.5005	120.841	143.259	77.3423	2.07054	0.526683	3.93129	8.45e-05	0.000841886
ENSRNOG00000011502	COL9A2	chr5:143756117-143773305	2954	10.8976	8.08634	32.7278	82.0371	32.6128	2.06922	0.686938	3.01223	0.00259334	0.0147798
ENSRNOG00000003736	COL5A2	chr9:51758656-51823228	4460	1500.66	4286.91	18010.3	10724.8	8487.38	2.06584	0.50601	4.0826	4.45e-05	0.00048924
ENSRNOG00000007129	CD8B	chr4:163964374-163980435	1306	53.2058	47.3628	228.465	241.214	139.339	2.06435	0.407342	5.06787	4.02e-07	9.27e-06
ENSRNOG00000017783	SFRP1	chr16:73009688-73045509	942	107.694	157.106	631.268	592.626	365.043	2.0639	0.371875	5.55	2.86e-08	1.02e-06
ENSRNOG00000002814	HIGD1B	chr10:90703633-90705402	736	43.5903	46.2076	241.682	184.89	126.862	2.06296	0.436049	4.73103	2.23e-06	3.9e-05
ENSRNOG00000008098	LRRC4	chr4:55519817-55919017	1959	3.8462	16.1727	63.5674	57.5484	34.7973	2.06246	0.696903	2.95946	0.00308176	0.0169852
ENSRNOG00000018371	TUBB6	chr18:62314820-62324460	1751	720.522	1303.06	4670	4717.74	2796.89	2.06231	0.381473	5.40618	6.44e-08	1.99e-06
ENSRNOG00000015461	SERPINE2	chr9:85312142-85375551	2060	401.928	847.91	3582.43	2380.3	1771.93	2.06163	0.445688	4.62571	3.73e-06	6.04e-05
ENSRNOG00000008040	FAM64A	chr10:58354689-58359530	1436	54.4879	85.4841	293.92	362.433	194.575	2.05862	0.423003	4.86669	1.13e-06	2.18e-05
ENSRNOG00000003572	ADAMTS2	chr10:35868733-36072447	3794	223.08	330.385	1253.72	1269.74	754.066	2.05777	0.35139	5.85611	4.74e-09	2.26e-07
ENSRNOG00000031084	LY49S7	chr4:213842713-213865924	1147	14.1027	25.4142	106.365	94.2814	58.5949	2.05679	0.555397	3.70328	0.000212833	0.00182911
ENSRNOG00000006940	NCF4	chr7:119473858-119490871	1496	694.24	570.664	2706.33	2944.76	1693.59	2.05536	0.298312	6.88998	5.58e-12	7.35e-10
ENSRNOG00000029762	ACR	chr7:130227694-130233848	1504	6.41034	4.62076	30.8396	39.1819	19.7897	2.05524	0.722871	2.84316	0.00446681	0.0231477
ENSRNOG00000013954	ALPL	chr5:159841922-159897413	2428	219.234	436.662	1160.58	1979.91	927.609	2.05497	0.449743	4.56921	4.9e-06	7.59e-05
ENSRNOG00000012181	LPL	chr16:22431493-22455871	3608	1284.63	1595.32	5929.39	6974.38	3864.25	2.05347	0.305201	6.72826	1.72e-11	1.85e-09
ENSRNOG00000011981	SLC39A13	chr3:86593276-86601182	2410	332.056	536.009	1900.1	2069.29	1184.92	2.05273	0.363331	5.64977	1.61e-08	6.27e-07
ENSRNOG00000030387	KNG1L1	chr11:84522970-84540955	1125	3.20517	4.62076	20.7695	36.733	16.0893	2.05085	0.776369	2.64159	0.00825175	0.038184
ENSRNOG00000007377	SLIT3	chr10:20195979-20392415	4506	492.955	650.373	2766.75	2361.93	1538.62	2.0479	0.328661	6.23104	4.63e-10	3.11e-08
ENSRNOG00000026679	SCN4B	chr8:48067554-48082728	4272	11.5386	23.1038	100.701	80.8127	53.2331	2.04788	0.579748	3.53237	0.000411859	0.00320318
ENSRNOG00000020821	CLIP3	chr1:89906479-89921238	2123	14.1027	12.7071	71.1199	68.5683	40.9011	2.04184	0.582106	3.50769	0.000452023	0.00346741
ENSRNOG00000002417	SERPINB10	chr13:32615861-32633549	1347	2.56414	4.62076	27.0633	29.3864	15.6523	2.03986	0.768789	2.65334	0.0079699	0.0371156
ENSRNOG00000017897	ADAM8	chr1:219236990-219248402	2481	34.6158	169.813	874.209	270.6	332.936	2.03422	0.659888	3.08268	0.00205148	0.0121627
ENSRNOG00000050672	SYNA	chr12:27161523-27168576	3102	3.8462	9.24153	39.6509	40.4063	22.7693	2.03333	0.715655	2.84122	0.00449409	0.0232559
ENSRNOG00000014269	CXCR2	chr9:81193441-81199814	1319	0.641034	34.6557	188.814	80.8127	75.2928	2.0312	0.798827	2.54272	0.0109992	0.0483409
ENSRNOG00000014684	NPR1	chr2:209271275-209286963	4068	268.593	325.764	1245.54	1386.06	790.383	2.03113	0.317047	6.40641	1.49e-10	1.22e-08
ENSRNOG00000008943	PENK	chr5:21834413-21839739	1284	41.6672	84.329	300.214	293.864	176.491	2.02923	0.463446	4.37858	1.19e-05	0.000161121
ENSRNOG00000021243	SIGLEC1	chr3:130111339-130129845	6671	244.875	241.435	1314.15	860.777	653.67	2.02821	0.36777	5.5149	3.49e-08	1.2e-06
ENSRNOG00000012723	TRIM55	chr2:124140060-124182027	2653	3.20517	11.5519	57.2736	37.9575	27.0032	2.02608	0.735203	2.75581	0.00585466	0.0287638
ENSRNOG00000025209	PLXND1	chr4:211138019-211177703	6104	722.445	1058.16	4375.45	3544.74	2380.57	2.02536	0.350343	5.78107	7.42e-09	3.27e-07
ENSRNOG00000008602	STEAP4	chr4:23017454-23062780	3082	366.03	324.609	1832.13	1239.13	923.916	2.02525	0.355867	5.69102	1.26e-08	5.08e-07
ENSRNOG00000006715	CCR1	chr8:132147928-132153481	1846	193.592	237.969	1090.72	826.493	576.656	2.02093	0.354757	5.69665	1.22e-08	4.96e-07
ENSRNOG00000011631	FST	chr2:65577803-65583544	1119	19.872	49.6732	120.212	237.54	104.45	2.02077	0.578017	3.49604	0.00047221	0.00358826
ENSRNOG00000042825	CD300LE	chr10:104711558-104720782	731	203.208	344.247	1577.23	934.243	751.834	2.02063	0.433666	4.65942	3.17e-06	5.27e-05
ENSRNOG00000013973	LCN2	chr3:16763058-16766466	936	3840.43	827.117	3443.97	23743	7718	2.02022	0.692073	2.91909	0.0035106	0.0189481
ENSRNOG00000027295	APH1B	chr8:76942438-76963484	1281	289.106	270.315	1079.39	1376.26	737.497	2.01972	0.319921	6.31317	2.73e-10	2e-08
ENSRNOG00000020129	CDH3	chr19:49537787-49587578	3169	108.976	217.176	839.593	659.97	448.244	2.01813	0.436904	4.61916	3.85e-06	6.2e-05
ENSRNOG00000011310	PDE10A	chr1:53617429-53846125	3402	13.4617	11.5519	61.6792	67.3439	37.6931	2.01788	0.596211	3.38451	0.000713064	0.00504968
ENSRNOG00000006855	PADI4	chr5:162967382-163001293	2258	26.9234	43.8973	140.352	198.358	100.018	2.01513	0.493848	4.08046	4.49e-05	0.000492653
ENSRNOG00000032973	IL13RA2	chrX:118588855-118658727	1917	31.4107	41.5869	177.485	161.625	101.015	2.01463	0.458993	4.38923	1.14e-05	0.000154619
ENSRNOG00000002052	CCDC80	chr11:64747815-64781404	4096	3754.53	3398.57	15626.9	15197.7	9308.7	2.01419	0.276523	7.28399	3.24e-13	6.21e-11
ENSRNOG00000018005	DUOXA1	chr3:120780502-120790938	1665	67.9496	78.553	266.228	401.614	199.223	2.01318	0.413165	4.87259	1.1e-06	2.14e-05
ENSRNOG00000002960	NDP	chrX:7591521-7615969	1925	7.69241	5.77596	38.3922	42.8552	23.2323	2.01299	0.691082	2.91281	0.0035819	0.0192395
ENSRNOG00000032626	MMP3	chr8:5680438-5701146	1476	2.56414	33.5005	112.03	118.77	65.6187	2.01289	0.733578	2.74393	0.00607078	0.0295961
ENSRNOG00000048881	LOC680910	chr12:22346646-22702124	669	42.9493	28.8798	149.163	187.338	99.7926	2.01233	0.470523	4.2768	1.9e-05	0.000238915
ENSRNOG00000018839	NTRK2	chr17:8156431-8464507	4750	8.33344	4.62076	34.6159	41.6308	21.9973	2.00974	0.707002	2.84262	0.00447448	0.0231627
ENSRNOG00000026163	CPT1C	chr1:102019483-102034000	2730	79.4882	68.1563	272.522	389.37	197.79	2.0093	0.402836	4.98788	6.1e-07	1.29e-05
ENSRNOG00000008911	DRAXIN	chr5:168572012-168585976	1029	3.8462	17.3279	59.1617	63.6706	35.2543	2.00901	0.699735	2.87111	0.00409035	0.0215339
ENSRNOG00000007159	CCL2	chr10:69047090-69048889	780	370.518	538.319	2011.5	1973.79	1200.03	2.00846	0.340022	5.90685	3.49e-09	1.75e-07
ENSRNOG00000011406	CCL4	chr10:70516523-70518348	631	30.1286	19.6382	140.352	100.404	71.1639	2.00631	0.526629	3.80973	0.000139118	0.00127938
ENSRNOG00000014288	FN1	chr9:78674438-78747362	8256	7399.45	12983.2	51910	38939.5	27314.2	2.00601	0.389793	5.14636	2.66e-07	6.56e-06
ENSRNOG00000006740	GATSL3	chr14:85129585-85133998	1514	123.078	138.623	503.504	650.175	346.503	2.00584	0.354563	5.65721	1.54e-08	6.07e-07
ENSRNOG00000049245	AABR06070935.1	chr12:22767284-22854726	1229	2.56414	4.62076	39.0216	18.3665	15.9789	2.00463	0.788429	2.54256	0.0110042	0.0483409
ENSRNOG00000029912	GP1BB	chr11:89612788-89619907	1396	23.7183	86.6393	358.117	205.705	165.982	2.00409	0.593861	3.37468	0.000739012	0.00519554
ENSRNOG00000028015	PF4	chr14:18758190-18758900	318	85.8985	176.744	684.136	520.385	360.203	2.00076	0.452047	4.42599	9.6e-06	0.000134593
ENSRNOG00000012481	PPM1J	chr2:226682750-226687760	1681	11.5386	13.8623	60.4205	72.2416	38.6558	1.9972	0.595233	3.35532	0.00079273	0.00550152
ENSRNOG00000012879	FABP3	chr5:152246243-152294518	685	43.5903	45.0525	194.478	205.705	119.78	1.99686	0.421161	4.74133	2.12e-06	3.73e-05
ENSRNOG00000004606	MEIS1	chr14:102927227-103063968	2472	198.079	291.108	1242.4	910.979	648.811	1.99519	0.38121	5.23384	1.66e-07	4.42e-06
ENSRNOG00000014350	CYR61	chr2:270055953-270058912	1984	878.857	2909.93	8473.34	9462.43	5322.3	1.99519	0.507758	3.92941	8.52e-05	0.000847708
ENSRNOG00000046377	LOC684480	chr10:34201391-34215262	1590	34.6158	35.8109	156.086	166.523	96.5001	1.99516	0.447422	4.45924	8.23e-06	0.000118514
ENSRNOG00000010791	FAM65C	chr3:170867541-170893688	2817	4.48724	10.3967	50.9798	33.0597	24.062	1.99061	0.724297	2.74834	0.00598982	0.0292896
ENSRNOG00000047726	INHBB	chr13:40555698-40561389	3119	76.283	183.675	584.065	610.993	356.602	1.98836	0.470764	4.22369	2.4e-05	0.000291025
ENSRNOG00000016156	NPTXR	chr7:121002638-121020713	4853	57.693	124.761	390.216	444.47	249.119	1.9837	0.461532	4.29807	1.72e-05	0.000220792
ENSRNOG00000008247	IKBIP	chr7:31873292-31891984	1195	243.593	437.817	1482.82	1506.05	899.913	1.98009	0.389266	5.08672	3.64e-07	8.5e-06
ENSRNOG00000007731	LOC691995	chr10:57414743-57416295	1474	109.617	100.502	419.796	489.774	274.462	1.97942	0.35312	5.60553	2.08e-08	7.81e-07
ENSRNOG00000020729	STC2	chr10:16432188-16441955	910	4.48724	5.77596	33.3571	29.3864	17.6381	1.97661	0.745049	2.653	0.00797803	0.0371416
ENSRNOG00000021104	EMP3	chr1:102979696-102982874	729	882.704	704.667	2967.53	3760.24	2035.03	1.97259	0.315287	6.25649	3.94e-10	2.72e-08
ENSRNOG00000007404	CCDC23	chr5:142055066-142060684	582	261.542	262.228	902.531	1343.2	677.299	1.97016	0.349072	5.64398	1.66e-08	6.45e-07
ENSRNOG00000017220	TCIRG1	chr1:226000344-226009795	2566	628.213	742.788	2956.2	2807.63	1749.59	1.96926	0.299813	6.56828	5.09e-11	4.81e-09
ENSRNOG00000020948	PTH1R	chr8:118328863-118348383	1836	74.3599	108.588	375.74	421.205	240.072	1.96876	0.394029	4.9965	5.84e-07	1.25e-05
ENSRNOG00000013141	ENO2	chr4:224302788-224311633	2217	279.491	279.556	984.98	1394.63	718.85	1.96674	0.337931	5.81995	5.89e-09	2.7e-07
ENSRNOG00000002343	UCHL1	chr14:42928246-42938965	1027	326.927	274.935	976.798	1618.7	781.344	1.96559	0.373657	5.26041	1.44e-07	3.91e-06
ENSRNOG00000012019	B3GALNT1	chr2:185583756-185613045	1888	279.491	389.299	1684.85	1182.8	868.638	1.96515	0.374264	5.2507	1.52e-07	4.1e-06
ENSRNOG00000021062	FXYD5	chr1:90620338-90629722	817	1053.86	809.789	3443.97	4420.21	2380.36	1.96409	0.321328	6.11243	9.81e-10	5.96e-08
ENSRNOG00000015594	RFTN2	chr9:61439704-61493694	1491	15.3848	28.8798	86.8544	124.892	62.6	1.96285	0.564794	3.47535	0.000510194	0.00382174
ENSRNOG00000007682	GRIA3	chrX:127656583-127922234	5030	68.5906	70.4667	366.299	242.438	183.511	1.96282	0.424218	4.62692	3.71e-06	6.01e-05
ENSRNOG00000020399	LTB4R	chr15:38340627-38341683	1056	18.59	24.259	112.659	88.1593	59.8777	1.96259	0.532883	3.68296	0.000230545	0.00195822
ENSRNOG00000006950	PADI3	chr5:163015781-163042857	3099	16.6669	39.2765	105.736	164.074	79.6904	1.9624	0.565003	3.47325	0.000514193	0.0038451
ENSRNOG00000023548	SNED1	chr9:100037559-100093411	5618	27.5645	47.3628	237.906	115.097	105.334	1.96212	0.546303	3.59164	0.000328603	0.00264901
ENSRNOG00000000907	ALOX5AP	chr12:8950727-8974708	936	246.798	319.988	1166.87	1225.66	725.432	1.96121	0.327334	5.99148	2.08e-09	1.1e-07
ENSRNOG00000012364	PRICKLE2	chr4:188925955-189025114	7677	227.567	338.471	1233.58	1175.46	729.579	1.96044	0.353959	5.5386	3.05e-08	1.06e-06
ENSRNOG00000015318	HEYL	chr5:144713816-144730808	4658	81.4113	167.503	521.756	581.606	331.503	1.96031	0.443111	4.42397	9.69e-06	0.00013547
ENSRNOG00000050767	NRN1	chr17:29834675-29877125	1376	8.97447	20.7934	61.6792	90.6081	44.7359	1.95979	0.626505	3.12814	0.00175918	0.0106819
ENSRNOG00000003242	GULP1	chr9:50936853-51211196	2817	143.592	169.813	711.199	615.89	402.603	1.95738	0.344506	5.68169	1.33e-08	5.31e-07
ENSRNOG00000016110	KCNK12	chr6:21346992-21464940	1891	17.9489	17.3279	66.0849	101.628	49.5958	1.95713	0.567357	3.44956	0.000561506	0.00413522
ENSRNOG00000010018	CLEC4A3	chr4:222933145-222943344	1264	954.499	1122.85	5159.66	3592.49	2660.21	1.95649	0.342585	5.71094	1.12e-08	4.66e-07
ENSRNOG00000014333	VCAM1	chr2:237158194-237177632	2954	907.704	1201.4	5104.9	3770.03	2697.62	1.95204	0.34548	5.65022	1.6e-08	6.27e-07
ENSRNOG00000030187	MMP12	chr8:5610391-5620293	1790	82.6934	247.211	821.341	688.132	451.381	1.95155	0.509511	3.83024	0.000128018	0.00119007
ENSRNOG00000017209	TUBB3	chr19:66931872-66940864	1704	135.258	203.314	692.947	745.68	435.471	1.95153	0.369483	5.28179	1.28e-07	3.56e-06
ENSRNOG00000018233	GAS6	chr16:80701558-80732410	2538	2726.32	3128.26	11937.4	12262.7	7366.62	1.95152	0.283261	6.88948	5.6e-12	7.35e-10
ENSRNOG00000004649	IL1B	chr3:128133908-128140349	1329	455.134	910.291	2936.69	2968.03	1782.47	1.95141	0.406897	4.79584	1.62e-06	2.95e-05
ENSRNOG00000012791	AJUBA	chr15:37092304-37102545	3228	150.643	212.555	729.451	813.024	466.975	1.95129	0.356632	5.47142	4.46e-08	1.46e-06
ENSRNOG00000024874	PRTFDC1	chr17:89615537-89724742	1099	120.514	127.071	494.063	548.547	316.245	1.95054	0.340754	5.72418	1.04e-08	4.34e-07
ENSRNOG00000028016	NCF2	chr13:75197733-75228157	1584	64.7444	122.45	489.658	336.719	249.144	1.95007	0.459977	4.2395	2.24e-05	0.00027423
ENSRNOG00000014357	GJA4	chr5:149142703-149145235	1588	333.338	291.108	1185.75	1413	789.112	1.94998	0.312751	6.23493	4.52e-10	3.06e-08
ENSRNOG00000002776	SELL	chr13:87249242-87267197	1578	109.617	135.157	680.989	382.023	321.68	1.94832	0.430835	4.5222	6.12e-06	9.18e-05
ENSRNOG00000015741	SLC2A13	chr7:132108133-132430525	2486	8.33344	11.5519	43.4272	61.2217	30.3084	1.94671	0.653226	2.98014	0.00288112	0.0160679
ENSRNOG00000023830	DNASE2	chr19:36998477-37001146	1412	739.112	840.979	3061.93	3471.27	1987.43	1.94652	0.294389	6.61206	3.79e-11	3.71e-09
ENSRNOG00000008159	MSANTD3	chr5:68798534-68820976	1625	48.0775	80.8634	268.116	296.313	169.792	1.94647	0.43725	4.45162	8.52e-06	0.000121832
ENSRNOG00000016508	PALMD	chr2:238543609-238596898	2226	96.7961	137.468	521.756	470.183	300.755	1.94316	0.378041	5.14008	2.75e-07	6.75e-06
ENSRNOG00000016587	NINJ1	chr17:17930043-17945158	1159	1272.45	1110.14	4605.8	5169.56	2977.99	1.9404	0.287196	6.75637	1.41e-11	1.59e-09
ENSRNOG00000042960	RGCC	chr15:65214321-65227156	890	202.567	298.039	952.252	1158.31	639.411	1.94008	0.36065	5.37941	7.47e-08	2.26e-06
ENSRNOG00000015253	HSF4	chr19:48091907-48097634	1514	51.9237	32.3454	165.527	204.481	111.079	1.93841	0.467459	4.14671	3.37e-05	0.000386569
ENSRNOG00000008154	RAMP3	chr14:80555462-80572980	1243	350.004	523.302	1717.58	1933.38	1108.45	1.93696	0.348813	5.553	2.81e-08	1e-06
ENSRNOG00000042086	RAB26	chr10:13711255-13715749	1249	30.1286	34.6557	129.023	157.952	86.1636	1.93658	0.470514	4.11587	3.86e-05	0.000432208
ENSRNOG00000039666	SRPX	chrX:14932358-15003055	1825	785.907	914.911	3851.81	3149.24	2135.91	1.93556	0.313168	6.18057	6.39e-10	4.15e-08
ENSRNOG00000014837	EMILIN2	chr9:119048147-119106488	3210	83.3344	194.072	986.238	319.577	390.424	1.9351	0.576951	3.35401	0.000796492	0.005525
ENSRNOG00000046216	RGD1561778	chr10:103215404-103467735	726	59.6161	130.537	550.707	307.333	258.058	1.93465	0.50776	3.81017	0.000138873	0.00127793
ENSRNOG00000049782	CSF2RA	chr14:1465138-1469169	978	214.105	274.935	1212.82	837.513	624.048	1.93399	0.373495	5.1781	2.24e-07	5.7e-06
ENSRNOG00000009425	FGF7	chr3:124669032-124952265	661	26.9234	32.3454	166.786	100.404	80.1296	1.93397	0.521307	3.70984	0.000207387	0.00179075
ENSRNOG00000012640	DPP7	chr3:2550547-2554800	1705	1366.68	1419.73	5722.95	5623.83	3465.31	1.93295	0.278335	6.94467	3.79e-12	5.42e-10
ENSRNOG00000008534	DUSP15	chr3:154820984-154831486	3106	6.41034	9.24153	42.7978	37.9575	23.5291	1.93228	0.69173	2.7934	0.00521574	0.0262083
ENSRNOG00000037299	SMPD5	chr7:117337459-117354917	1923	42.9493	68.1563	215.877	265.702	145.195	1.93176	0.444292	4.34795	1.37e-05	0.000182011
ENSRNOG00000004057	CCDC88A	chr14:113345110-113606671	5544	11.5386	18.4831	110.141	42.8552	45.0702	1.93153	0.655575	2.94631	0.00321594	0.0175831
ENSRNOG00000001715	ECE2	chr11:87020943-87036302	3004	44.2313	58.9147	229.094	213.052	133.658	1.93068	0.426897	4.52259	6.11e-06	9.17e-05
ENSRNOG00000010994	HAS1	chr1:60640269-60652067	2096	37.18	25.4142	123.988	150.605	82.4601	1.93004	0.489735	3.94099	8.11e-05	0.000815136
ENSRNOG00000002922	ADORA2B	chr10:48358059-48374870	1849	66.0265	88.9497	307.767	346.515	198.436	1.92798	0.393861	4.89509	9.83e-07	1.93e-05
ENSRNOG00000002723	SELE	chr13:87235308-87244746	1700	7.05137	27.7246	100.071	79.5882	52.7652	1.92797	0.659234	2.92456	0.00344946	0.0186866
ENSRNOG00000008246	EMILIN1	chr6:36636869-36644587	3836	2641.06	4200.27	13761.4	14641.8	8638.91	1.92703	0.348984	5.52183	3.35e-08	1.16e-06
ENSRNOG00000009907	MMP8	chr8:5771723-5780576	1401	17.9489	101.657	392.104	215.5	179.092	1.92701	0.649959	2.96482	0.00302856	0.0167681
ENSRNOG00000037707	ARMCX6	chrX:105455044-105457641	1929	50.0006	73.9322	250.493	280.395	160.226	1.92617	0.422073	4.5636	5.03e-06	7.76e-05
ENSRNOG00000021447	PRR7	chr17:11803151-11804276	970	100.642	92.4153	356.858	448.143	244.28	1.9251	0.367721	5.23522	1.65e-07	4.41e-06
ENSRNOG00000015751	CYP4F18	chr16:19269138-19385552	2750	84.6165	149.02	458.189	538.751	301.541	1.92456	0.415708	4.62959	3.66e-06	5.96e-05
ENSRNOG00000010513	TFPI2	chr4:28855874-28860297	1130	22.4362	164.037	646.373	322.026	284.039	1.9242	0.67362	2.85651	0.00428329	0.0223317
ENSRNOG00000023375	RAB34	chr10:66182984-66185961	1089	319.876	413.558	1333.03	1695.84	921.29	1.92408	0.335944	5.72739	1.02e-08	4.28e-07
ENSRNOG00000002061	PTPN13	chr14:7662573-7837443	8258	132.694	195.227	808.753	570.586	419.62	1.92353	0.398426	4.82782	1.38e-06	2.56e-05
ENSRNOG00000015421	SLC27A3	chr2:209191619-209196288	2274	99.3602	106.278	380.145	472.632	259.013	1.92347	0.363162	5.29645	1.18e-07	3.31e-06
ENSRNOG00000013166	WNT4	chr5:159405833-159424674	1224	41.0262	124.761	453.783	304.884	227.34	1.92131	0.544971	3.52552	0.000422659	0.00327145
ENSRNOG00000030715	CFH	chr13:61997443-62094826	4250	832.062	1215.26	5172.24	3362.3	2600.85	1.92065	0.382789	5.01751	5.23e-07	1.14e-05
ENSRNOG00000042729	EFHC1	chr9:25924343-25962902	2157	56.411	61.2251	252.381	239.989	149.323	1.92043	0.399747	4.8041	1.55e-06	2.84e-05
ENSRNOG00000014426	LOX	chr18:46715871-46821060	1783	48.7186	368.506	1497.29	658.746	633.994	1.92017	0.670088	2.86555	0.00416279	0.0218206
ENSRNOG00000028965	RGD1566006	chr12:23884194-23940244	675	5.12827	4.62076	32.0984	26.9376	16.9067	1.91979	0.746986	2.57005	0.0101683	0.0453941
ENSRNOG00000019609	B4GALT2	chr5:140496558-140505030	2019	128.207	162.882	563.924	637.93	365.776	1.9196	0.350865	5.47105	4.47e-08	1.46e-06
ENSRNOG00000033627	PANX2	chr7:129728891-129738977	2915	5.7693	15.0175	66.0849	44.0796	32.1756	1.91788	0.68057	2.81804	0.00483173	0.0246223
ENSRNOG00000025053	LRP1	chr7:71018807-71099367	14714	3069.27	4007.36	13837.5	14919.7	8782.46	1.91747	0.305981	6.26661	3.69e-10	2.58e-08
ENSRNOG00000028845	EBF1	chr10:23523671-23911514	554	99.3602	93.5705	269.375	566.913	251.096	1.91701	0.457122	4.19366	2.74e-05	0.000326402
ENSRNOG00000014117	HMOX1	chr19:25622555-25629372	1542	853.216	1376.99	5141.4	4099.41	2816.34	1.9165	0.370047	5.17907	2.23e-07	5.69e-06
ENSRNOG00000001224	ITGB2	chr20:13944199-13966161	2898	810.267	976.137	4406.29	2933.74	2242.71	1.91607	0.355124	5.3955	6.83e-08	2.1e-06
ENSRNOG00000014902	AABR06000382.1	chr1:8676471-8678091	1620	40.3851	61.2251	219.654	211.827	130.701	1.91498	0.442717	4.32553	1.52e-05	0.000198685
ENSRNOG00000000525	PI16	chr20:9163204-9172499	1887	189.746	129.381	717.493	601.197	401.57	1.91454	0.373451	5.12661	2.95e-07	7.11e-06
ENSRNOG00000028530	AABR06099253.1	chr19:65787858-65798862	10882	12.8207	67.0011	326.648	97.9547	124.586	1.91297	0.697267	2.74352	0.00607843	0.0296234
ENSRNOG00000024846	IER5L	chr3:14389635-14390865	1230	87.1806	105.122	396.509	394.268	241.008	1.91005	0.365824	5.22123	1.78e-07	4.67e-06
ENSRNOG00000036942	TNFRSF9	chr5:171587144-171613565	1383	82.0523	43.8973	234.129	307.333	163.133	1.90968	0.460368	4.14815	3.35e-05	0.000385053
ENSRNOG00000013813	UBTD1	chr1:268681818-268733008	1854	229.49	265.694	901.272	1114.24	614.614	1.90943	0.328275	5.81656	6.01e-09	2.74e-07
ENSRNOG00000033579	GLT8D2	chr7:27294787-27312237	1053	22.4362	34.6557	157.345	99.1792	76.93	1.90805	0.537254	3.55148	0.00038307	0.00300171
ENSRNOG00000008178	NXN	chr10:63464226-63601539	1347	294.235	408.938	1509.88	1350.55	874.49	1.90521	0.341874	5.57284	2.51e-08	9.15e-07
ENSRNOG00000001414	SERPINE1	chr12:24653384-24663763	3063	289.747	1751.27	5554.28	4209.6	2899.53	1.90513	0.610895	3.11858	0.00181724	0.0109659
ENSRNOG00000018681	NES	chr2:206747072-206755585	5682	29.4876	69.3115	225.947	206.929	130.269	1.9028	0.5139	3.70267	0.000213345	0.00183135
ENSRNOG00000049056	AK1	chr3:16995038-17002961	1814	126.925	175.589	589.729	651.399	378.366	1.90272	0.360956	5.27134	1.35e-07	3.73e-06
ENSRNOG00000004508	PXDN	chr6:57551668-57661402	4422	129.489	523.302	1926.53	1077.5	899.817	1.90174	0.575514	3.30442	0.000951746	0.0064245
ENSRNOG00000021390	MEIS3	chr1:79335446-79346210	1794	215.387	203.314	798.683	880.368	513.782	1.89854	0.31561	6.01547	1.79e-09	9.84e-08
ENSRNOG00000029508	SLPIL2	chr3:166920397-166922851	393	208.977	370.816	1198.97	1196.27	729.58	1.89811	0.390503	4.86067	1.17e-06	2.23e-05
ENSRNOG00000040171	LOC681383	chr15:1718965-1737760	393	21.1541	17.3279	76.7844	94.2814	51.1425	1.89798	0.54677	3.47126	0.000518016	0.00386773
ENSRNOG00000045827	LOC100909671	chr10:103215404-103467735	746	11.5386	16.1727	48.4623	86.9348	39.7955	1.89679	0.622006	3.04948	0.00229241	0.0133535
ENSRNOG00000001506	TMEM35	chrX:105015269-105038196	1944	15.3848	13.8623	67.3437	67.3439	39.9335	1.89627	0.582388	3.25602	0.00112984	0.00740703
ENSRNOG00000024818	EVA1B	chr5:147928854-147930156	1077	385.261	405.472	1286.45	1917.46	976.64	1.8961	0.3423	5.53928	3.04e-08	1.06e-06
ENSRNOG00000010947	MMP14	chr15:36960272-36969507	2361	1223.73	3968.08	14695.4	8294.32	6934.17	1.89319	0.532008	3.55857	0.000372878	0.00293448
ENSRNOG00000039204	PRAM1	chr7:18687953-18693103	1986	91.6678	122.45	465.741	407.737	266.979	1.89289	0.377305	5.01687	5.25e-07	1.15e-05
ENSRNOG00000001704	RUNX1	chr11:36371332-36460969	2010	62.8213	107.433	330.424	379.575	215.606	1.89219	0.424877	4.4535	8.45e-06	0.000121245
ENSRNOG00000020695	TEAD2	chr1:102279566-102300642	2135	188.464	235.659	784.837	924.448	522.508	1.89158	0.337624	5.60261	2.11e-08	7.93e-07
ENSRNOG00000013742	LARGE	chr19:23595327-24054765	3634	153.207	241.435	825.117	781.189	490.614	1.88929	0.375997	5.02475	5.04e-07	1.11e-05
ENSRNOG00000010489	SAMD4A	chr15:27721128-27815275	2240	8.97447	24.259	83.0782	74.6905	46.8466	1.88903	0.624328	3.02571	0.00248053	0.0142765
ENSRNOG00000024382	FCGR3A	chr13:93924703-94068497	1199	192.31	224.107	684.765	1001.59	514.465	1.88728	0.360553	5.23439	1.66e-07	4.42e-06
ENSRNOG00000029148	PDGFD	chr8:4454375-4684425	3234	40.3851	77.3978	281.333	217.949	151.275	1.88666	0.478764	3.94068	8.13e-05	0.000815136
ENSRNOG00000017914	PRKCDBP	chr1:177323466-177325064	1057	1648.74	1395.47	5082.87	7064.99	3716.92	1.88604	0.319672	5.89993	3.64e-09	1.82e-07
ENSRNOG00000000599	LAMA4	chr20:45787183-45926467	5912	1826.31	2299.99	7487.73	8893.07	5023.61	1.88337	0.30742	6.12638	8.99e-10	5.53e-08
ENSRNOG00000006588	MEOX2	chr6:66231862-66293008	2249	42.3082	56.6044	208.954	200.807	124.826	1.87833	0.433067	4.33727	1.44e-05	0.000189666
ENSRNOG00000012698	CHSY1	chr1:128095352-128156041	3734	312.824	698.891	2332.48	1870.94	1280.72	1.87576	0.442226	4.24163	2.22e-05	0.000272087
ENSRNOG00000038963	AABR06063297.1	chr10:23523129-23523524	395	14.1027	6.93115	27.0633	85.7104	32.5834	1.8734	0.719939	2.60217	0.00926351	0.0420641
ENSRNOG00000006778	MMP19	chr7:3187861-3195640	1873	205.131	257.608	1246.8	650.175	580.776	1.87286	0.428701	4.36868	1.25e-05	0.000167649
ENSRNOG00000019728	ITGAM	chr1:206522888-206573171	3456	185.9	404.317	2059.33	584.055	797.946	1.87268	0.575869	3.25193	0.00114625	0.00750109
ENSRNOG00000047786	LOC100910855	chr17:16659765-16679168	1206	160.899	91.2601	340.495	728.538	322.233	1.87099	0.485286	3.85544	0.000115519	0.00109413
ENSRNOG00000020431	MATK	chr7:11492661-11497686	1630	151.284	185.986	762.808	582.831	413.33	1.87054	0.364406	5.13313	2.85e-07	6.92e-06
ENSRNOG00000007674	NACAD	chr14:80494051-80502042	4354	46.7955	40.4317	163.639	194.685	109.201	1.87046	0.437649	4.27388	1.92e-05	0.000241023
ENSRNOG00000012467	IL17A	chr9:25696864-25700352	1144	5.12827	11.5519	40.2803	47.7529	25.698	1.86768	0.699109	2.67152	0.00755092	0.0354591
ENSRNOG00000015084	NECAB2	chr19:62834864-62861089	1537	16.0258	20.7934	79.3019	84.486	49.0027	1.86397	0.553162	3.36967	0.000752586	0.00527571
ENSRNOG00000016248	SOX18	chr3:180885769-180887570	1617	257.696	311.902	1100.79	1133.83	687.736	1.86343	0.317769	5.86412	4.52e-09	2.19e-07
ENSRNOG00000031287	CACNA2D3	chr16:4812760-5730476	3267	8.33344	17.3279	81.19	41.6308	36.409	1.86259	0.67065	2.77729	0.00548137	0.0272885
ENSRNOG00000005378	GNA15	chr7:11221816-11242333	1683	149.361	150.175	577.141	597.524	361.328	1.86232	0.329556	5.65101	1.6e-08	6.26e-07
ENSRNOG00000019388	EGFL7	chr3:9395190-9415283	1775	621.803	658.459	2222.34	2769.67	1535.95	1.8609	0.302352	6.15476	7.52e-10	4.76e-08
ENSRNOG00000005679	FAP	chr3:55133417-55201837	2286	108.976	209.09	672.178	623.237	395.788	1.8608	0.422795	4.40118	1.08e-05	0.000147815
ENSRNOG00000050735	CD99	chr20:57779376-57783907	594	993.602	824.806	2806.41	4394.49	2205.18	1.86055	0.348791	5.33427	9.59e-08	2.78e-06
ENSRNOG00000000138	GLIS1	chr5:130892705-131081379	2382	14.1027	16.1727	75.5256	58.7728	40.4954	1.85647	0.589794	3.14766	0.00164581	0.0101372
ENSRNOG00000014973	TEKT1	chr10:58636235-58663145	1375	10.2565	16.1727	52.2385	68.5683	35.9648	1.85467	0.622307	2.98031	0.00287956	0.0160679
ENSRNOG00000016117	MYOF	chr1:264066286-264215424	7229	528.212	1139.02	3955.02	2844.36	2080.56	1.85347	0.440849	4.20431	2.62e-05	0.00031398
ENSRNOG00000000824	DSE	chr20:29528500-29603844	4232	486.545	691.959	2522.55	2102.35	1424.98	1.85311	0.345632	5.36151	8.25e-08	2.45e-06
ENSRNOG00000046046	KLRA5	chr4:227796159-227878280	843	6.41034	9.24153	44.686	31.8353	22.5831	1.8529	0.704813	2.62893	0.00856548	0.0394229
ENSRNOG00000008016	CKAP4	chr7:25084904-25093002	2548	1435.92	2735.49	8699.29	7949.03	5109.36	1.8502	0.393972	4.69627	2.65e-06	4.51e-05
ENSRNOG00000032946	PDZD7	chr1:272213428-272237327	3907	15.3848	20.7934	86.2251	72.2416	47.6036	1.84794	0.566554	3.26172	0.00110739	0.00728607
ENSRNOG00000019708	CTSF	chr1:227045195-227050974	1893	608.341	658.459	2324.3	2541.93	1502.94	1.84628	0.290393	6.35789	2.05e-10	1.56e-08
ENSRNOG00000004488	BDKRB1	chr6:138631449-138633866	1312	19.872	34.6557	112.659	121.219	70.8324	1.84456	0.523939	3.52056	0.000430631	0.00331905
ENSRNOG00000009348	NOS3	chr4:7333451-7353763	3953	151.284	261.073	807.494	830.166	502.488	1.84403	0.392736	4.69534	2.66e-06	4.52e-05
ENSRNOG00000049384	UGGT2	chr15:107668388-107670932	225	6.41034	13.8623	49.0916	48.9774	28.9188	1.8417	0.67717	2.7197	0.00653416	0.0314551
ENSRNOG00000050869	CEBPD	chr11:92069788-92070898	1110	735.266	659.614	2335	3040.27	1657.37	1.84152	0.309596	5.94812	2.71e-09	1.39e-07
ENSRNOG00000021244	HSPA12B	chr3:130168346-130201122	3350	167.951	192.917	668.401	729.763	431.135	1.84082	0.329437	5.58778	2.3e-08	8.46e-07
ENSRNOG00000007810	GDF6	chr5:27786776-27805029	3507	26.2824	41.5869	176.226	111.424	87.2768	1.83871	0.52462	3.50485	0.000456861	0.00349349
ENSRNOG00000004819	PORCN	chrX:15819272-15831751	1874	153.848	149.02	495.322	689.356	363.89	1.83867	0.358118	5.13425	2.83e-07	6.9e-06
ENSRNOG00000010183	FAM198B	chr2:198087636-198158770	3588	344.235	443.593	1547.02	1487.69	937.838	1.83694	0.322329	5.69895	1.21e-08	4.92e-07
ENSRNOG00000045997	CHST14	chr3:117272096-117274097	2001	160.899	172.123	621.827	662.419	396.376	1.83646	0.327011	5.6159	1.96e-08	7.46e-07
ENSRNOG00000050794	PDLIM4	chr10:39171367-39185480	1176	339.748	332.695	1297.78	1273.41	795.562	1.83601	0.299264	6.13508	8.51e-10	5.34e-08
ENSRNOG00000015618	WNT5A	chr16:4414511-4432113	1981	17.9489	65.8459	167.415	208.154	112.419	1.83573	0.593014	3.09559	0.00196421	0.011734
ENSRNOG00000015602	CDH2	chr18:7997532-8212372	4076	191.669	350.023	1125.96	1018.73	659.482	1.83491	0.401275	4.57269	4.81e-06	7.49e-05
ENSRNOG00000015812	TM4SF1	chr2:166792814-166802011	1950	487.186	887.187	2595.56	2816.2	1663.79	1.8344	0.386878	4.74154	2.12e-06	3.73e-05
ENSRNOG00000013913	PIEZO1	chr19:66009930-66075579	7907	709.624	825.962	2780.6	3080.68	1813.27	1.83355	0.296414	6.18578	6.18e-10	4.04e-08
ENSRNOG00000049770	CRYBA4	chr12:52147268-52170761	800	13.4617	20.7934	59.1617	93.057	45.4703	1.83231	0.597938	3.06438	0.00218121	0.012781
ENSRNOG00000026490	DNM3	chr13:84804252-85272009	2736	32.0517	43.8973	135.317	176.319	94.7438	1.83226	0.473194	3.8721	0.000107902	0.00103069
ENSRNOG00000000640	EGR2	chr20:24551941-24556227	2956	87.8216	122.45	427.349	395.492	253.217	1.83121	0.382305	4.78993	1.67e-06	3.03e-05
ENSRNOG00000007369	SHISA4	chr13:57243998-57248373	1447	150.643	161.727	505.392	711.396	374.186	1.82891	0.360478	5.07356	3.9e-07	9.06e-06
ENSRNOG00000006604	THY1	chr8:46998622-47003437	1328	758.343	1144.79	4175.31	3201.9	2279.72	1.82883	0.363324	5.0336	4.81e-07	1.07e-05
ENSRNOG00000007370	RNF144A	chr6:54234289-54348903	1657	10.8976	19.6382	69.2318	68.5683	41.4299	1.82592	0.601875	3.03372	0.00241558	0.0139694
ENSRNOG00000018257	HPX	chr1:177429399-177436973	1549	30.1286	32.3454	106.365	149.381	77.5556	1.82588	0.491453	3.71526	0.000202995	0.00176119
ENSRNOG00000007638	LOXL3	chr4:178552499-178571933	2839	101.283	118.985	425.461	424.879	262.404	1.82578	0.357208	5.11126	3.2e-07	7.61e-06
ENSRNOG00000002449	MAGED2	chr5:37832722-37840896	2206	570.52	746.253	2718.92	2315.41	1559.17	1.82551	0.327065	5.58148	2.38e-08	8.75e-07
ENSRNOG00000007428	YPEL4	chr3:78522965-78740155	1523	57.693	50.8284	200.772	228.969	132.037	1.82529	0.412477	4.42518	9.64e-06	0.00013497
ENSRNOG00000008829	SORBS3	chr15:55585615-55616959	2597	226.926	318.833	1119.67	984.445	650.47	1.82524	0.351496	5.19279	2.07e-07	5.35e-06
ENSRNOG00000010974	ROR2	chr17:14050994-14228982	3942	151.925	324.609	1132.88	784.862	588.745	1.82452	0.456463	3.99709	6.41e-05	0.000668193
ENSRNOG00000020901	S1PR5	chr8:22323890-22328878	2040	13.4617	18.4831	74.2668	62.4461	40.9779	1.82329	0.58982	3.09126	0.00199309	0.0118649
ENSRNOG00000036832	ITGA5	chr7:142750120-142773323	4394	935.909	2446.69	6192.47	7515.58	4188.02	1.82319	0.464225	3.92739	8.59e-05	0.000852988
ENSRNOG00000010805	FABP4	chr2:113547679-113552343	626	3334.66	2048.15	7971.1	13080.6	6460.66	1.82306	0.392626	4.64326	3.43e-06	5.61e-05
ENSRNOG00000016491	FAM110D	chr5:156229919-156232883	1212	141.668	160.572	479.588	695.479	361.668	1.82134	0.369693	4.92665	8.37e-07	1.69e-05
ENSRNOG00000001827	MASP1	chr11:79916066-79998571	2502	24.3593	130.537	636.933	134.688	229.065	1.81962	0.709413	2.56496	0.0103187	0.0458831
ENSRNOG00000006076	STEAP2	chr4:25414630-25434255	3479	173.079	249.521	815.047	811.8	502.841	1.81872	0.356972	5.09487	3.49e-07	8.21e-06
ENSRNOG00000026415	COL14A1	chr7:95678307-95895351	5652	470.519	721.994	3320.61	1444.83	1468.19	1.81428	0.467203	3.88329	0.000103052	0.000989923
ENSRNOG00000019305	SH3TC2	chr18:56514259-56575124	4513	30.1286	42.7421	132.799	161.625	90.1367	1.81284	0.477668	3.79518	0.000147537	0.00134745
ENSRNOG00000046452	FCGR2B	chr13:93924703-94068497	1395	433.339	306.126	1774.85	1079.95	883.521	1.81269	0.397545	4.55971	5.12e-06	7.89e-05
ENSRNOG00000029810	LOC100911766	chr1:221371201-221390853	1410	539.109	587.992	1752.82	2535.8	1325.4	1.81255	0.33282	5.44604	5.15e-08	1.64e-06
ENSRNOG00000025705	ARMCX2	chrX:105506650-105511422	3295	178.207	255.297	877.985	779.965	513.248	1.81209	0.360377	5.02833	4.95e-07	1.1e-05
ENSRNOG00000019695	IL17B	chr18:56240487-56244922	688	14.1027	23.1038	72.3787	86.9348	47.9996	1.81028	0.573741	3.15522	0.00160379	0.00993828
ENSRNOG00000016164	FCRL2	chr2:205998854-206009505	2109	476.929	405.472	2025.97	1332.18	1042.1	1.80914	0.361879	4.99929	5.75e-07	1.23e-05
ENSRNOG00000016432	LOC56764	chr2:271026745-271032571	1951	17.3079	12.7071	54.7561	75.9149	39.3718	1.80732	0.597268	3.02597	0.00247838	0.0142698
ENSRNOG00000016623	TMEFF2	chr9:55079809-55369414	3252	51.2827	24.259	171.821	135.912	93.9629	1.80665	0.524229	3.44629	0.00056833	0.00416442
ENSRNOG00000003827	WIPI1	chr10:97578114-97614772	1884	403.851	556.802	1686.74	1951.75	1127.39	1.80613	0.333989	5.40775	6.38e-08	1.98e-06
ENSRNOG00000015850	RBP7	chr5:169925570-169930189	613	145.515	183.675	427.349	880.368	399.793	1.80612	0.44136	4.09218	4.27e-05	0.000471453
ENSRNOG00000009113	MARCKSL1	chr1:86018381-86035603	1515	1582.71	1839.06	5554.91	7301.3	3986.19	1.80432	0.310613	5.80891	6.29e-09	2.84e-07
ENSRNOG00000019183	ALOX15	chr10:56704494-56713186	2188	299.363	1316.92	3918.52	2941.09	2082.95	1.80362	0.566235	3.18528	0.00144615	0.00912348
ENSRNOG00000007564	EVC	chr14:78187670-78227302	4315	124.361	95.8809	397.139	440.796	259.231	1.80307	0.36564	4.93126	8.17e-07	1.66e-05
ENSRNOG00000047656	GAA	chr10:108007822-108024832	3365	667.957	773.978	2731.51	2642.33	1672.14	1.80173	0.296268	6.0814	1.19e-09	6.91e-08
ENSRNOG00000017857	CUL7	chr9:15536181-15548930	5079	314.748	380.058	1346.87	1256.27	809.261	1.80092	0.316728	5.68602	1.3e-08	5.19e-07
ENSRNOG00000000569	MGC112715	chr20:31669365-31817711	1870	888.473	1046.6	3511.94	3680.65	2238.35	1.7981	0.293944	6.11715	9.53e-10	5.81e-08
ENSRNOG00000012489	CACNB3	chrX:114723349-114993826	2525	394.236	386.989	1284.56	1627.27	904.45	1.79445	0.312107	5.74949	8.95e-09	3.84e-07
ENSRNOG00000006709	PZP	chr4:227010997-227056787	4687	9.61551	19.6382	70.4906	62.4461	39.7475	1.79361	0.61809	2.90186	0.00370951	0.0198299
ENSRNOG00000024728	ARHGAP22	chr16:11523403-11572152	2086	104.489	167.503	502.875	538.751	322.207	1.79336	0.394036	4.55127	5.33e-06	8.18e-05
ENSRNOG00000002827	RBFOX1	chr10:7109395-7450683	4153	8.33344	18.4831	52.8679	64.895	35.2595	1.79291	0.646543	2.77307	0.00555307	0.0275329
ENSRNOG00000004613	GPM6B	chrX:30000364-30041765	2089	163.464	205.624	634.415	755.476	430.772	1.79269	0.346256	5.17737	2.25e-07	5.7e-06
ENSRNOG00000033608	CD276	chr8:63090339-63120668	3031	488.468	757.805	2410.53	2278.67	1456.72	1.79049	0.353678	5.06248	4.14e-07	9.49e-06
ENSRNOG00000028036	ADAMTS7	chr8:97035310-97074365	5004	167.951	303.815	844.628	964.854	559.41	1.78928	0.401913	4.45191	8.51e-06	0.000121785
ENSRNOG00000049361	GAS7	chr10:53885813-53988130	6793	744.24	1017.72	3610.12	2970.48	2048.68	1.78913	0.3367	5.31374	1.07e-07	3.05e-06
ENSRNOG00000000704	CMKLR1	chr12:50577123-50581377	2530	71.7958	99.3464	311.543	340.393	201.768	1.788	0.39317	4.54765	5.42e-06	8.32e-05
ENSRNOG00000023465	LOC500300	chr4:214707826-214742088	1265	194.874	207.934	570.848	964.854	474.088	1.78795	0.386414	4.62705	3.71e-06	6.01e-05
ENSRNOG00000018384	ADAM12	chr1:212904286-213226787	2712	7.69241	26.5694	101.33	59.9973	48.2065	1.78764	0.666205	2.68331	0.00728965	0.0344097
ENSRNOG00000023257	ADAMTS9	chr4:188409400-188604215	7965	220.516	398.541	1268.83	1097.09	733.192	1.78644	0.399995	4.46617	7.96e-06	0.000115196
ENSRNOG00000017932	ST3GAL2	chr19:54102745-54118616	3221	396.159	531.388	1642.05	1804.82	1072.4	1.78463	0.326586	5.46452	4.64e-08	1.5e-06
ENSRNOG00000042139	CLEC4A1	chr4:222969396-222981511	1199	446.16	482.87	1978.14	1469.32	1075.13	1.78399	0.33307	5.35619	8.5e-08	2.52e-06
ENSRNOG00000006066	TFEC	chr4:44672397-44744984	1622	17.9489	30.035	130.282	72.2416	61.5089	1.78379	0.580651	3.07206	0.00212588	0.0125173
ENSRNOG00000047433	AABR06041411.1	chr6:2292318-2295746	3428	249.362	451.68	1853.52	896.286	849.988	1.78351	0.474208	3.76102	0.000169219	0.00150858
ENSRNOG00000050828	VKORC1	chr1:206361381-206363943	782	775.651	906.825	2648.43	3599.84	1941.92	1.78272	0.322187	5.53319	3.14e-08	1.09e-06
ENSRNOG00000039698	PRSS22	chr10:13186015-13190726	1271	9.61551	33.5005	102.589	90.6081	58.413	1.78103	0.629844	2.82773	0.00468793	0.0240624
ENSRNOG00000013589	CXCL12	chr4:215195688-215203554	441	3106.45	2720.48	11350.2	9966.89	6661.59	1.78061	0.290427	6.131	8.73e-10	5.44e-08
ENSRNOG00000001752	NRROS	chr11:74956755-74973813	2472	526.289	475.939	2017.16	1668.9	1150.95	1.78051	0.311799	5.71044	1.13e-08	4.66e-07
ENSRNOG00000010146	NDN	chr1:124119140-124120755	1615	127.566	180.21	494.063	670.99	360.687	1.77993	0.383129	4.64579	3.39e-06	5.56e-05
ENSRNOG00000007763	PLOD1	chr5:168379096-168405535	2891	1032.06	1192.16	3930.48	4215.73	2542.72	1.7785	0.290473	6.12278	9.2e-10	5.63e-08
ENSRNOG00000027204	MAP6	chr1:170429899-170494770	2341	67.3085	79.7082	304.62	252.233	172.857	1.77847	0.401197	4.43292	9.3e-06	0.000130719
ENSRNOG00000002385	PRG4	chr13:72576528-72653723	3588	195.515	136.313	585.953	651.399	384.442	1.77513	0.361619	4.90884	9.16e-07	1.81e-05
ENSRNOG00000018346	AGTR1A	chr17:37218833-37270540	2183	188.464	231.038	986.238	593.851	491.718	1.77464	0.401632	4.41858	9.94e-06	0.000138214
ENSRNOG00000026112	TMEM202	chr8:64061457-64067142	1282	13.4617	10.3967	51.6092	48.9774	30.3921	1.77432	0.634028	2.79848	0.00513432	0.0259064
ENSRNOG00000015353	PRSS12	chr2:247015138-247074636	2499	57.693	87.7945	368.187	203.256	176.455	1.77388	0.481445	3.68449	0.000229159	0.00194872
ENSRNOG00000010841	COL8A2	chr5:148097756-148100436	2100	12.1796	69.3115	278.815	101.628	113.932	1.7726	0.695852	2.54738	0.0108535	0.0478085
ENSRNOG00000039544	KCND1	chrX:16288758-16301947	2912	43.5903	61.2251	217.136	186.114	124.713	1.77206	0.440591	4.02201	5.77e-05	0.000608664
ENSRNOG00000045595	TNFSF9	chr9:8913009-8915338	1304	52.5648	53.1388	195.737	205.705	124.539	1.77145	0.413287	4.28624	1.82e-05	0.000230586
ENSRNOG00000042915	MXRA7	chr10:105406416-105430525	441	21.1541	16.1727	73.6375	78.3638	46.3059	1.77104	0.559185	3.16718	0.00153923	0.00963146
ENSRNOG00000009730	CYP7B1	chr2:122442001-122610354	2626	210.9	247.211	847.775	833.84	524.989	1.77072	0.322793	5.48561	4.12e-08	1.36e-06
ENSRNOG00000024065	ZFP575	chr1:82707388-82709496	1138	17.3079	13.8623	59.7911	69.7927	39.4207	1.76983	0.585835	3.02103	0.00251914	0.0144473
ENSRNOG00000049629	REEP2	chr18:27351032-27353125	1607	101.924	63.5355	261.193	373.452	195.696	1.76855	0.433532	4.0794	4.52e-05	0.000494528
ENSRNOG00000019018	PLAT	chr16:73730255-73754851	2508	1597.46	1919.93	7130.25	5715.66	4019.11	1.76781	0.315884	5.5964	2.19e-08	8.17e-07
ENSRNOG00000039593	ECSCR	chr18:28220120-28228745	680	52.5648	97.0361	267.486	311.006	178.438	1.7678	0.449343	3.93417	8.35e-05	0.000834662
ENSRNOG00000014490	BDH2	chr2:258981007-259001648	1156	33.9748	35.8109	99.442	179.992	85.2754	1.76608	0.512695	3.44469	0.000571709	0.00418287
ENSRNOG00000000787	AABR06099817.1	chr20:5344904-5347354	843	28.8465	28.8798	119.582	106.526	69.9257	1.7651	0.490917	3.59552	0.000323748	0.00261566
ENSRNOG00000048478	KCNE4	chr9:84443996-84447230	2674	136.54	228.728	679.73	690.581	426.124	1.76487	0.3905	4.5195	6.2e-06	9.25e-05
ENSRNOG00000023296	WTIP	chr1:91112724-91137956	1111	137.181	195.227	531.826	707.723	385.004	1.76438	0.379828	4.6452	3.4e-06	5.57e-05
ENSRNOG00000001375	GAL3ST4	chr12:21639958-21648595	2207	71.7958	95.8809	302.102	326.924	195.415	1.76437	0.391112	4.51116	6.45e-06	9.58e-05
ENSRNOG00000018851	PPP2R2B	chr18:36647302-36757305	1707	25.0003	51.9836	169.933	137.137	94.316	1.76203	0.524001	3.36264	0.000772015	0.00539115
ENSRNOG00000030642	LILRC2	chr1:69994292-69998713	1034	10.2565	42.7421	154.198	84.486	71.6217	1.76191	0.664504	2.65146	0.00801442	0.0372633
ENSRNOG00000018989	EPDR1	chr17:56066896-56091673	2204	61.5392	78.553	262.451	265.702	164.085	1.76121	0.399136	4.41257	1.02e-05	0.000141446
ENSRNOG00000014060	MRAS	chr8:107054727-107082507	3593	203.208	329.229	1029.67	946.488	615.64	1.76099	0.377378	4.66637	3.07e-06	5.12e-05
ENSRNOG00000042522	FAM109B	chr7:123558648-123563270	2676	43.5903	56.6044	196.996	186.114	118.755	1.75973	0.433093	4.06316	4.84e-05	0.000525904
ENSRNOG00000051024	RN50_10_0890.5	chr10:88965630-89008424	1465	48.7241	22.3862	162.919	121.123	87.1316	1.75821	0.541987	3.24401	0.0011786	0.007668
ENSRNOG00000018461	PDGFRB	chr18:55596757-55637692	5370	1250.66	2108.22	6568.84	5838.1	3871.05	1.75775	0.368412	4.77114	1.83e-06	3.27e-05
ENSRNOG00000006756	MAGED1	chrX:64712950-64719623	2822	1471.17	2125.55	6623.59	6499.3	4102.7	1.75758	0.329723	5.33049	9.79e-08	2.81e-06
ENSRNOG00000007541	FHL3	chr5:146460219-146466971	1067	49.3596	93.5705	312.802	237.54	170.532	1.75649	0.472336	3.71872	0.000200233	0.00174449
ENSRNOG00000013287	SALL2	chr15:32538671-32556550	5186	76.283	83.1738	263.081	328.148	183.717	1.75577	0.387648	4.52928	5.92e-06	8.92e-05
ENSRNOG00000016716	ARMC3	chr17:87632222-87725943	2052	7.69241	8.08634	35.8747	37.9575	22.043	1.75517	0.690374	2.54235	0.0110109	0.0483541
ENSRNOG00000000853	AIF1	chr20:7234608-7239707	649	2138.49	2052.77	6778.42	8312.68	4723.97	1.7549	0.28841	6.08475	1.17e-09	6.8e-08
ENSRNOG00000019973	ARL3	chr1:273718180-273753577	768	363.466	269.16	964.839	1354.22	722.195	1.75385	0.356382	4.92127	8.6e-07	1.72e-05
ENSRNOG00000018054	F2RL2	chr2:45296358-45569036	1505	53.2058	105.122	346.159	260.804	187.994	1.75228	0.472653	3.70732	0.000209462	0.00180333
ENSRNOG00000004554	DCN	chr7:38783713-38823738	1614	7414.2	7383.98	21332.8	32495.3	16792.1	1.75174	0.327867	5.34282	9.15e-08	2.68e-06
ENSRNOG00000011452	ALDOC	chr10:66049071-66052680	1600	75.001	67.0011	239.164	287.742	163.882	1.75168	0.393888	4.44716	8.7e-06	0.000123904
ENSRNOG00000011800	F3	chr2:243348429-243360438	1768	508.34	732.391	2616.96	1927.26	1421.56	1.75125	0.364731	4.80148	1.57e-06	2.88e-05
ENSRNOG00000010668	ANXA6	chr10:40092955-40129924	2513	2539.78	2752.82	9370.21	9544.46	5937.74	1.7492	0.277374	6.30631	2.86e-10	2.07e-08
ENSRNOG00000038916	DRAM1	chr7:29007047-29040615	2867	341.03	422.8	1382.12	1372.59	863.36	1.74751	0.316095	5.52843	3.23e-08	1.12e-06
ENSRNOG00000003259	C1QTNF1	chr10:107090741-107112156	2751	531.417	641.131	1976.25	2243.16	1321.61	1.74725	0.307272	5.68635	1.3e-08	5.19e-07
ENSRNOG00000007025	EVC2	chr14:78103483-78185967	4067	66.6675	69.3115	243.57	258.356	156.429	1.74681	0.390117	4.47765	7.55e-06	0.000109609
ENSRNOG00000036604	IFIT2	chr1:260116147-260122211	3409	173.079	240.28	776.655	727.314	470.505	1.7454	0.353885	4.93211	8.13e-07	1.65e-05
ENSRNOG00000011683	FES	chr1:143127276-143136513	2799	509.622	572.975	1932.83	1943.18	1216.52	1.74494	0.295833	5.89839	3.67e-09	1.83e-07
ENSRNOG00000030639	USP13	chr2:138848084-138967805	7545	39.7441	70.4667	222.8	195.909	129.878	1.74438	0.466085	3.74261	0.000182118	0.00161173
ENSRNOG00000011263	PLAC9	chr16:3817393-3831461	410	64.1034	41.5869	140.981	270.6	126.5	1.74346	0.501456	3.47679	0.000507454	0.00380643
ENSRNOG00000026302	LRRN4CL	chr1:231985668-231988583	2372	23.7183	26.5694	123.988	78.3638	62.2009	1.74311	0.541659	3.2181	0.00129043	0.00826403
ENSRNOG00000001261	FTCD	chr20:14965124-14978653	1885	10.2565	13.8623	39.0216	66.1194	31.5235	1.74124	0.6514	2.67307	0.00751599	0.0353407
ENSRNOG00000010986	CMTM7	chr8:122126647-122153564	1519	782.061	554.492	2204.09	2606.82	1505.9	1.74099	0.330443	5.26866	1.37e-07	3.76e-06
ENSRNOG00000016525	SUSD3	chr17:17878840-17895037	1279	144.874	82.0186	426.72	412.634	261.615	1.74084	0.414832	4.19649	2.71e-05	0.000323626
ENSRNOG00000049123	AABR06058376.1	chr9:8931867-8936411	1551	14.1027	11.5519	54.1267	55.0995	33.0823	1.73995	0.614157	2.83307	0.00461037	0.023748
ENSRNOG00000006876	MSX1	chr14:77690989-77694787	1759	19.872	41.5869	116.435	129.79	75.5058	1.73932	0.54004	3.22073	0.00127866	0.00820289
ENSRNOG00000014516	HS6ST1	chr9:42274320-42313302	3269	752.574	933.394	2608.78	3462.7	1900.23	1.73904	0.325516	5.3424	9.17e-08	2.68e-06
ENSRNOG00000050720	AABR06061565.1	chr9:97608959-97618933	1251	606.418	1431.28	5628.54	2311.73	2460.11	1.73816	0.52421	3.31577	0.000913913	0.00621811
ENSRNOG00000020467	NREP	chr18:25900066-25926253	435	23.7183	77.3978	320.354	111.424	131.245	1.73799	0.639132	2.71929	0.00654216	0.0314728
ENSRNOG00000013621	RND1	chrX:114723349-114993826	1609	44.8724	83.1738	233.5	249.785	150.097	1.73675	0.459589	3.77892	0.000157512	0.00142498
ENSRNOG00000018526	DLG4	chr10:56372665-56398718	3066	114.745	214.866	698.612	528.956	382.907	1.73596	0.431039	4.02738	5.64e-05	0.000598405
ENSRNOG00000022312	LRSAM1	chr3:17257992-17344203	4596	886.55	1013.1	2864.31	3948.8	2133.59	1.73461	0.321529	5.39488	6.86e-08	2.1e-06
ENSRNOG00000025332	CD109	chr8:85501108-85614760	4329	21.1541	23.1038	119.582	58.7728	54.8909	1.73457	0.589621	2.94183	0.00326278	0.0178011
ENSRNOG00000003732	FLRT2	chr6:128739107-128828633	2900	14.1027	28.8798	113.288	64.895	54.3748	1.73256	0.608772	2.84599	0.00442737	0.0230005
ENSRNOG00000016957	IGFBP2	chr9:79888613-79915188	1315	64.7444	53.1388	138.464	319.577	140.555	1.73126	0.511905	3.382	0.000719603	0.00508363
ENSRNOG00000000854	NCR3	chr20:7243479-7249038	937	10.2565	12.7071	58.5323	40.4063	29.9741	1.72932	0.651257	2.65536	0.00792241	0.0369417
ENSRNOG00000016794	PHYHD1	chr3:14185689-14199073	1260	740.394	616.872	2318.64	2479.48	1509.08	1.72849	0.296877	5.82225	5.81e-09	2.68e-07
ENSRNOG00000003312	CHI3L1	chr13:56075045-56086477	1658	1634.64	817.875	3697.61	5307.92	2803.1	1.72683	0.415436	4.15665	3.23e-05	0.000373653
ENSRNOG00000013548	SEPW1	chr1:78801627-78804176	282	321.799	251.832	885.538	1169.33	643.728	1.72622	0.342523	5.03972	4.66e-07	1.04e-05
ENSRNOG00000026128	CPNE8	chr7:131298536-131472968	3380	233.336	365.04	1175.05	986.894	677.921	1.72612	0.37495	4.60361	4.15e-06	6.6e-05
ENSRNOG00000000700	TMEM119	chr12:50380530-50387588	2167	911.55	1120.54	3021.65	4240.22	2276.08	1.7244	0.332254	5.19	2.1e-07	5.4e-06
ENSRNOG00000000288	SCARF2	chr11:90774763-90786143	3308	453.211	598.389	1881.85	1845.22	1172.5	1.72181	0.321613	5.35367	8.62e-08	2.54e-06
ENSRNOG00000037267	RENBP	chr1:152602557-152611616	1417	305.773	259.918	872.321	1138.72	631.101	1.71938	0.332832	5.16591	2.39e-07	5.99e-06
ENSRNOG00000012237	RDX	chr8:55167299-55194096	3987	425.005	548.716	1799.4	1635.84	1082.43	1.71433	0.323375	5.30137	1.15e-07	3.23e-06
ENSRNOG00000018251	MRC1	chr17:83099573-83180475	5091	530.135	689.649	3326.9	1228.11	1424.17	1.7134	0.486124	3.52462	0.000424086	0.00327902
ENSRNOG00000015442	SFXN3	chr1:272239200-272247546	2709	483.339	711.598	2141.15	2095.01	1332.89	1.71238	0.342128	5.00507	5.58e-07	1.21e-05
ENSRNOG00000008409	MYO1F	chr7:18618341-18669048	3817	648.726	769.357	2853.61	2143.98	1576.74	1.7122	0.332649	5.14718	2.64e-07	6.54e-06
ENSRNOG00000007178	CD8A	chr4:164017632-164021869	1388	462.185	495.577	1662.19	1682.37	1055.4	1.71064	0.294258	5.8134	6.12e-09	2.79e-07
ENSRNOG00000045670	TNFSF12	chr10:56036417-56045715	1538	440.39	423.955	1494.15	1512.18	949.34	1.70682	0.293629	5.81285	6.14e-09	2.79e-07
ENSRNOG00000005931	CPQ	chr7:71880823-72338526	1738	1028.22	1088.19	3612.64	3728.4	2319.84	1.70626	0.281508	6.06112	1.35e-09	7.66e-08
ENSRNOG00000037167	RTP3	chr8:118603381-118607896	1958	22.4362	40.4317	134.058	104.077	73.7069	1.70578	0.533599	3.19674	0.00138991	0.0088106
ENSRNOG00000003840	SLIT2	chr14:66864064-67201603	7135	135.258	195.227	625.604	548.547	369.577	1.7056	0.373944	4.56111	5.09e-06	7.84e-05
ENSRNOG00000001555	BTG3	chr11:20528292-20544036	1322	219.234	311.902	955.399	921.999	591.013	1.7053	0.350414	4.86652	1.14e-06	2.18e-05
ENSRNOG00000005034	ARHGEF25	chr7:70646952-70653981	2104	508.34	592.613	1799.4	2042.36	1211.71	1.70478	0.303982	5.60814	2.05e-08	7.74e-07
ENSRNOG00000010077	SMARCD3	chr4:7089269-7120843	1671	114.104	99.3464	297.067	470.183	239.731	1.7024	0.404803	4.2055	2.61e-05	0.000312588
ENSRNOG00000009912	FGR	chr5:154839095-154866416	2498	380.133	451.68	1558.97	1344.43	917.219	1.7018	0.319764	5.32205	1.03e-07	2.93e-06
ENSRNOG00000007089	LGMN	chr6:135492943-135518919	1818	5832.77	5162.55	19131.9	18785.3	12000.4	1.70053	0.27743	6.12959	8.81e-10	5.44e-08
ENSRNOG00000016469	FXYD2	chr8:48336165-48343346	647	429.493	259.918	1073.09	1371.37	767.146	1.69924	0.377691	4.49903	6.83e-06	0.000100752
ENSRNOG00000013196	DOK5	chr3:174447258-174579714	1442	18.59	39.2765	105.106	118.77	69.1364	1.69884	0.546694	3.10748	0.0018869	0.0113487
ENSRNOG00000005772	PTPLAD2	chr5:110713012-110738698	1202	76.283	91.2601	338.606	258.356	187.729	1.69809	0.404587	4.1971	2.7e-05	0.00032326
ENSRNOG00000036691	FAM195B	chr10:109313273-109315325	1147	521.802	474.784	1535.69	1924.81	1092.21	1.69644	0.308662	5.49612	3.88e-08	1.29e-06
ENSRNOG00000045684	AABR06090530.1	chr17:16747887-16769745	2709	42.9493	24.259	95.0364	161.625	79.1703	1.69562	0.54221	3.12725	0.0017645	0.0107009
ENSRNOG00000014629	LMO1	chr1:180718642-180753889	898	25.6414	18.4831	77.4137	91.8326	52.1603	1.69503	0.547119	3.09809	0.00194771	0.0116519
ENSRNOG00000001958	IFT57	chr11:56827639-56895355	2548	128.207	152.485	490.916	489.774	309.404	1.69486	0.347449	4.87801	1.07e-06	2.09e-05
ENSRNOG00000007230	KANK3	chr7:18846291-18859539	2697	263.465	255.297	796.166	1007.71	568.879	1.69445	0.324653	5.21928	1.8e-07	4.71e-06
ENSRNOG00000012499	RARG	chr7:141637840-141660460	2540	305.132	384.679	1223.51	1174.23	757.927	1.6936	0.323111	5.24154	1.59e-07	4.28e-06
ENSRNOG00000020559	CDKN1C	chr1:223521110-223523972	1870	149.361	185.986	461.965	732.212	374.166	1.69339	0.391494	4.32546	1.52e-05	0.000198685
ENSRNOG00000009886	FKBP14	chr4:149413604-149428266	1388	202.567	232.193	766.585	744.456	477.56	1.69289	0.324089	5.22355	1.76e-07	4.62e-06
ENSRNOG00000022321	HAPLN3	chr1:141796055-141803912	1322	8.97447	15.0175	38.3922	63.6706	30.7999	1.69234	0.661842	2.55702	0.0105574	0.0467873
ENSRNOG00000001195	TRPV4	chr12:49492069-49529956	3211	67.3085	70.4667	202.66	287.742	153.745	1.6899	0.416467	4.0577	4.96e-05	0.000537943
ENSRNOG00000003687	RGS2	chr13:65830460-65834020	1641	584.623	1221.04	2967.53	3510.45	2031.31	1.68821	0.418603	4.03297	5.51e-05	0.000585628
ENSRNOG00000028548	CCL9	chr10:70416899-70421785	1291	88.4627	61.2251	335.46	204.481	169.175	1.68725	0.459559	3.67146	0.000241171	0.00203542
ENSRNOG00000009389	RIPK2	chr5:34512874-34543807	2582	157.694	162.882	578.4	535.078	351.978	1.68723	0.334469	5.0445	4.55e-07	1.03e-05
ENSRNOG00000001448	HIP1	chr12:26178239-26312676	7376	462.185	685.028	2139.89	1859.92	1264.16	1.68717	0.350965	4.80724	1.53e-06	2.81e-05
ENSRNOG00000000842	DDAH2	chr20:7122434-7125498	1311	797.446	527.922	1839.05	2811.3	1461.77	1.68309	0.376201	4.47391	7.68e-06	0.000111323
ENSRNOG00000032307	DSEL	chr13:1936645-1940272	3627	32.0517	62.3803	240.423	117.546	111.338	1.68217	0.554205	3.03529	0.00240308	0.0139132
ENSRNOG00000011718	C1RL	chr4:224126652-224141154	1389	25.6414	61.2251	208.954	123.668	103.365	1.68149	0.55967	3.00443	0.00266075	0.0150755
ENSRNOG00000049393	CEBPB	chr3:170577776-170578880	892	383.979	532.543	1546.39	1623.6	1002.72	1.68087	0.33304	5.04704	4.49e-07	1.02e-05
ENSRNOG00000006019	G0S2	chr13:116559386-116560299	729	106.412	185.986	433.013	613.442	327.714	1.68046	0.427936	3.92689	8.61e-05	0.000853902
ENSRNOG00000015445	MAL	chr3:127099277-127123286	2272	42.3082	58.9147	179.373	183.665	113.831	1.68017	0.443416	3.78916	0.000151157	0.00137705
ENSRNOG00000021474	SIGLEC5	chr1:99639155-99647531	2474	234.618	236.814	889.943	733.436	514.572	1.67848	0.330683	5.07579	3.86e-07	8.98e-06
ENSRNOG00000018122	TSPAN17	chr17:12482947-12490502	1570	70.5137	71.6218	238.535	263.253	158.148	1.67829	0.389126	4.31298	1.61e-05	0.000208559
ENSRNOG00000016547	RGS19	chr3:180905217-180910056	1290	258.978	181.365	731.339	788.536	480.507	1.67569	0.351005	4.77398	1.81e-06	3.24e-05
ENSRNOG00000019587	PTPRN	chr9:82215892-82231061	3512	223.08	306.126	862.251	966.079	578.056	1.67491	0.344922	4.85591	1.2e-06	2.28e-05
ENSRNOG00000020415	RAMP2	chr10:88965630-89008424	778	381.927	424.626	1134.87	1654.46	880.459	1.67471	0.342032	4.89634	9.76e-07	1.92e-05
ENSRNOG00000009068	PHLDA3	chr13:57637216-57640301	1423	562.828	490.956	1540.72	2066.84	1141.8	1.67152	0.321819	5.19398	2.06e-07	5.34e-06
ENSRNOG00000001389	IRS3	chr12:24140328-24142467	1969	36.5389	32.3454	107.624	143.259	78.3527	1.6708	0.483286	3.45717	0.00054588	0.00404057
ENSRNOG00000010105	S100A11	chr2:210998953-211004364	504	4485.95	6960.03	16990.1	22660.6	12520.4	1.66995	0.358817	4.65404	3.25e-06	5.4e-05
ENSRNOG00000043151	CNTLN	chr5:107251786-107365767	2507	19.231	13.8623	81.19	48.9774	40.0701	1.66962	0.613036	2.72352	0.00645894	0.0312213
ENSRNOG00000014034	OLFML2A	chr3:28455739-28481133	5515	114.104	276.091	853.439	565.689	445.057	1.66946	0.488858	3.41502	0.000637767	0.0045901
ENSRNOG00000037331	CD33	chr1:99475532-99479841	930	121.155	152.485	559.519	390.595	300.955	1.66885	0.393881	4.23693	2.27e-05	0.000276152
ENSRNOG00000014909	SH2D5	chr5:160363222-160376011	1290	19.872	15.0175	59.1617	75.9149	41.614	1.66797	0.581996	2.86594	0.00415769	0.0218017
ENSRNOG00000016242	FZD1	chr4:26377856-26382008	4152	523.725	1127.47	3107.25	2732.94	1840.16	1.66778	0.426537	3.91005	9.23e-05	0.000907623
ENSRNOG00000010977	IGFBP6	chr7:141546159-141551065	966	629.495	311.902	1475.27	1824.41	1038.29	1.66724	0.41231	4.04365	5.26e-05	0.000565852
ENSRNOG00000003715	SRPX2	chrX:104569971-104594594	1662	116.027	164.037	531.197	440.796	307.578	1.66698	0.383295	4.34908	1.37e-05	0.000181372
ENSRNOG00000013452	RCN1	chr3:102027677-102040073	1221	404.492	1047.76	3893.34	1530.54	1696.08	1.66674	0.544015	3.06378	0.00218556	0.0128014
ENSRNOG00000015382	ARID5A	chr9:42534320-42538959	2427	255.772	265.694	847.145	926.897	563.083	1.66654	0.311164	5.35585	8.52e-08	2.52e-06
ENSRNOG00000008030	SHC2	chr7:13117669-13139889	3904	129.489	134.002	446.23	455.49	285.567	1.66626	0.342525	4.86464	1.15e-06	2.2e-05
ENSRNOG00000006548	MRC2	chr10:93278917-93339315	4443	275.003	527.922	1908.91	969.752	907.055	1.66388	0.472965	3.51797	0.000434862	0.00334812
ENSRNOG00000022581	ATP10A	chr1:117145829-117311749	5049	142.951	191.762	648.261	508.14	366.407	1.66341	0.375123	4.4343	9.24e-06	0.000130258
ENSRNOG00000017704	SEMA3F	chr8:115795105-115824684	3485	339.748	404.317	1132.88	1399.53	803.207	1.66274	0.322937	5.1488	2.62e-07	6.49e-06
ENSRNOG00000004307	TOR3A	chr13:79075162-79253783	1809	164.746	190.607	590.358	623.237	384.9	1.66152	0.333439	4.98299	6.26e-07	1.32e-05
ENSRNOG00000022239	TUSC5	chr10:63104260-63261223	3399	116.027	62.3803	293.92	334.271	197.474	1.6603	0.440743	3.76706	0.000165183	0.00147893
ENSRNOG00000008482	RBMS1	chr3:51911275-52132833	1955	86.5396	159.416	371.964	498.345	273.455	1.6585	0.436845	3.79653	0.000146735	0.00134264
ENSRNOG00000016874	ZFP521	chr18:5006329-5284770	4723	91.6678	154.796	472.035	390.595	272.728	1.65734	0.418301	3.96208	7.43e-05	0.000758674
ENSRNOG00000008492	CCDC19	chr13:95428890-95452273	1800	50.6417	48.518	161.751	188.563	110.539	1.65703	0.428871	3.86371	0.000111678	0.00106258
ENSRNOG00000004226	IRAK3	chr7:65142552-65201088	3034	357.056	218.331	1055.47	915.877	624.893	1.6566	0.376456	4.40052	1.08e-05	0.000148129
ENSRNOG00000018179	GLT8D1	chr16:7011032-7025985	1615	490.391	462.076	1467.71	1728.9	1017.08	1.65352	0.300219	5.50771	3.64e-08	1.23e-06
ENSRNOG00000047817	ENOX1	chr15:63013559-63564417	3525	26.2824	27.7246	100.071	95.5059	61.3382	1.65341	0.506788	3.26253	0.00110421	0.0072684
ENSRNOG00000009867	TGFB3	chr6:119222051-119243828	2619	279.491	351.178	1130.37	999.138	677.587	1.6522	0.331471	4.98445	6.21e-07	1.31e-05
ENSRNOG00000037248	PLXNA3	chr1:152103539-152119323	7371	83.3344	110.898	336.718	328.148	210.844	1.64724	0.385698	4.27079	1.95e-05	0.000243344
ENSRNOG00000000664	TPST2	chr12:52099686-52139825	1744	445.518	492.111	1409.18	1737.47	1001.04	1.64692	0.310293	5.30762	1.11e-07	3.14e-06
ENSRNOG00000028566	PLD4	chr6:146329773-146337292	1989	1046.81	994.62	3171.45	3624.33	2166.77	1.64593	0.285418	5.76674	8.08e-09	3.51e-07
ENSRNOG00000018126	ABCA1	chr5:74023651-74112802	6801	56.411	128.226	519.238	176.319	216.935	1.64504	0.586357	2.80552	0.00502355	0.0254444
ENSRNOG00000014367	EPHB6	chr4:135690322-135705579	4066	83.3344	79.7082	253.011	303.66	176.466	1.64313	0.384241	4.2763	1.9e-05	0.000239251
ENSRNOG00000048812	GPX1	chr8:116466149-116467210	844	5366.09	4715.49	15353.1	18051.8	10660.2	1.64016	0.285437	5.74612	9.13e-09	3.9e-07
ENSRNOG00000020173	TIE1	chr5:141084009-141111588	3819	783.343	962.274	2993.33	2810.08	1853.21	1.63895	0.305392	5.36672	8.02e-08	2.4e-06
ENSRNOG00000045821	SLC41A3	chr4:187052886-187078590	2237	72.4368	80.8634	246.717	275.498	165.533	1.63886	0.388725	4.21598	2.49e-05	0.000299149
ENSRNOG00000009733	PRAF2	chrX:16399545-16402441	1352	412.185	477.094	1292.12	1684.82	947.353	1.63884	0.324091	5.05673	4.27e-07	9.72e-06
ENSRNOG00000025625	RNASE4	chr15:31854893-31866407	1370	1806.43	2571.46	7072.97	7576.8	4668.56	1.63842	0.325677	5.03082	4.88e-07	1.09e-05
ENSRNOG00000030729	C4B	chr20:6381702-6396071	5314	4532.75	1870.25	8459.5	14036.9	7064.44	1.63828	0.464903	3.52392	0.000425218	0.00328602
ENSRNOG00000016695	MMP2	chr19:26630487-26658966	2280	1370.53	3071.65	10129.2	5514.85	4947.65	1.63637	0.476324	3.43541	0.000591651	0.00430069
ENSRNOG00000018715	CLEC10A	chr10:56506746-56511257	1488	1089.76	764.737	3352.71	2819.87	1971.27	1.63262	0.335993	4.8591	1.18e-06	2.25e-05
ENSRNOG00000030625	TF	chr8:111064526-111112746	2980	1491.69	1572.22	4929.3	5149.97	3224.71	1.63234	0.278424	5.86278	4.55e-09	2.2e-07
ENSRNOG00000016696	ANGPT2	chr16:75509828-75715383	2266	87.8216	174.434	566.442	352.637	290.661	1.63208	0.474005	3.44317	0.000574928	0.00419588
ENSRNOG00000017087	MAN1C1	chr5:156559977-156703434	3767	347.44	406.627	1409.18	1101.99	802.416	1.63199	0.335182	4.86895	1.12e-06	2.17e-05
ENSRNOG00000008907	FGGY	chr5:118461634-118848789	1869	89.1037	102.812	323.501	323.251	205.899	1.63087	0.371253	4.39287	1.12e-05	0.000152718
ENSRNOG00000015397	CPNE7	chr19:66634978-66651622	2212	90.3858	128.226	403.433	336.719	235.371	1.62951	0.397202	4.10247	4.09e-05	0.000454544
ENSRNOG00000017911	FAM115A	chr4:136915530-136965939	2897	148.72	154.796	481.476	531.404	322.763	1.62799	0.33673	4.8347	1.33e-06	2.5e-05
ENSRNOG00000014204	PACSIN3	chr3:86781241-86789804	1754	123.72	113.209	360.635	433.45	252.706	1.62775	0.358422	4.54144	5.59e-06	8.54e-05
ENSRNOG00000013889	TMED3	chr8:96576975-96584888	1306	1173.09	1268.4	3610.75	4433.68	2570.5	1.62764	0.295673	5.50485	3.69e-08	1.24e-06
ENSRNOG00000000563	ADAMTS14	chr20:32605125-32679770	3380	40.3851	98.1912	352.453	156.728	159.5	1.62591	0.571754	2.84372	0.00445898	0.0231235
ENSRNOG00000019356	LRFN4	chr1:226626840-226726328	2368	191.028	211.4	637.562	694.254	425.352	1.62566	0.325487	4.99455	5.9e-07	1.26e-05
ENSRNOG00000007062	RIN3	chr6:135381784-135490155	3676	480.134	548.716	1796.25	1591.76	1084.81	1.62491	0.30845	5.26798	1.38e-07	3.77e-06
ENSRNOG00000027582	DPYSL4	chr1:218349770-218365280	2626	36.5389	17.3279	92.5189	105.301	61.725	1.62453	0.56277	2.88667	0.00389339	0.0206687
ENSRNOG00000020839	LRFN3	chr1:89975456-89980935	2048	59.6161	57.7596	169.303	236.316	128.072	1.62452	0.429863	3.77915	0.000157365	0.0014247
ENSRNOG00000027936	AABR06003815.2	chr1:80181379-80183335	1932	35.8979	65.8459	256.787	115.097	116.83	1.62426	0.558201	2.90981	0.00361644	0.0193964
ENSRNOG00000020552	FOSL1	chr1:227749933-227768383	1663	22.4362	23.1038	90.6307	72.2416	51.0891	1.62411	0.54406	2.98516	0.00283428	0.0158674
ENSRNOG00000014029	KLHL13	chrX:121716856-121821667	2998	221.157	322.298	973.651	839.962	579.051	1.6231	0.362387	4.47891	7.5e-06	0.000109178
ENSRNOG00000010165	TNFAIP2	chr6:144512072-144524703	3797	322.44	335.005	1214.07	955.059	694.458	1.6226	0.329568	4.92343	8.5e-07	1.71e-05
ENSRNOG00000010718	GPR153	chr5:173005831-173016052	2643	73.7189	174.434	540.008	336.719	276.903	1.62253	0.50345	3.22283	0.00126933	0.00815987
ENSRNOG00000014323	EXTL2	chr2:237037493-237057929	1988	40.3851	41.5869	152.939	129.79	89.6369	1.61966	0.458687	3.53108	0.000413869	0.00321263
ENSRNOG00000003104	TRPV2	chr10:48673947-48780459	2734	442.954	366.196	1618.77	1065.26	859.004	1.61728	0.366694	4.41042	1.03e-05	0.000142591
ENSRNOG00000039025	AABR06022945.1	chr3:35062656-35063057	396	38.462	38.1213	146.646	116.321	83.2817	1.61485	0.473787	3.40838	0.000653495	0.00468708
ENSRNOG00000004367	ELK3	chr7:34151382-34186857	3818	860.908	1013.1	3022.91	3086.8	1959.46	1.61428	0.294698	5.47775	4.31e-08	1.42e-06
ENSRNOG00000020097	INHA	chr9:82469742-82472643	1398	48.0775	60.0699	153.569	216.725	117.318	1.61392	0.448659	3.5972	0.000321657	0.00260021
ENSRNOG00000011129	ARHGEF40	chr15:32193214-32217278	5336	245.516	383.523	1090.09	1005.26	669.264	1.61349	0.367624	4.38896	1.14e-05	0.000154619
ENSRNOG00000012108	THSD1	chr16:74316448-74346243	4305	96.7961	129.381	357.488	396.717	240.396	1.6128	0.377054	4.27738	1.89e-05	0.000238505
ENSRNOG00000017033	NCKAP5L	chrX:115586235-115597266	3978	91.6678	129.381	451.895	296.313	238.396	1.6125	0.427357	3.7732	0.000161165	0.00145245
ENSRNOG00000020349	RAB3IL1	chr1:232857119-233097150	1131	53.2058	58.9147	241.053	144.483	122.299	1.60886	0.472683	3.40368	0.000664835	0.00475204
ENSRNOG00000004400	AVPR1A	chr7:67528202-67532266	1735	28.8465	27.7246	117.694	83.2615	63.4156	1.6078	0.522061	3.07972	0.00207195	0.0122641
ENSRNOG00000016617	WWTR1	chr2:166985077-167101346	1538	39.1031	73.9322	204.548	186.114	123.788	1.60631	0.48087	3.34042	0.00083652	0.00575335
ENSRNOG00000010830	SLC25A4	chr16:48981574-48985393	1313	2097.46	2407.42	7053.46	7504.56	4677.31	1.60482	0.285374	5.62358	1.87e-08	7.17e-07
ENSRNOG00000009951	AIF1L	chr3:14598260-14622945	3070	60.2572	124.761	319.725	314.68	201.332	1.60477	0.46418	3.45721	0.000545796	0.00404057
ENSRNOG00000015346	OBSL1	chr9:82450334-82468812	5415	94.873	137.468	450.636	325.699	248.122	1.6043	0.413676	3.87816	0.00010525	0.00100867
ENSRNOG00000008257	MFAP2	chr5:163246453-163252003	1034	573.725	356.954	1147.36	1976.24	991.353	1.60391	0.410393	3.90823	9.3e-05	0.000913255
ENSRNOG00000032788	DYSF	chr4:180300910-180487010	6319	396.159	514.06	1348.76	1626.05	952.658	1.60367	0.329236	4.8709	1.11e-06	2.15e-05
ENSRNOG00000046862	ARMCX1	chrX:105798562-105803308	2974	82.6934	78.553	253.64	282.844	171.418	1.6034	0.381636	4.2014	2.65e-05	0.000317783
ENSRNOG00000007679	CYTH4	chr7:119809477-119833941	2654	1066.04	921.843	3246.97	3165.16	2061.62	1.60304	0.289187	5.54325	2.97e-08	1.05e-06
ENSRNOG00000003336	MYBPH	chr13:56089935-56097582	1846	26.2824	18.4831	71.7493	85.7104	49.4831	1.60297	0.553897	2.89399	0.00380386	0.0202675
ENSRNOG00000015763	CML3	chr4:182065697-182067356	1078	12.1796	17.3279	54.7561	53.8751	33.8561	1.60256	0.615245	2.60474	0.00919432	0.041802
ENSRNOG00000037931	PLAUR	chr1:82587227-82602678	686	249.362	310.746	1003.86	826.493	587.299	1.60198	0.342642	4.67539	2.93e-06	4.92e-05
ENSRNOG00000004936	SDC2	chr7:71743812-71857533	3430	1248.73	1401.25	3939.92	4619.79	2749.09	1.60073	0.292642	5.46993	4.5e-08	1.46e-06
ENSRNOG00000004854	HAS2	chr7:97055457-97081461	4174	67.3085	239.125	598.54	495.896	344.369	1.60012	0.548496	2.91729	0.00353086	0.0190398
ENSRNOG00000050648	LOC691658	chr8:72142802-72160730	1279	158.335	210.245	612.387	592.626	386.2	1.599	0.352221	4.53978	5.63e-06	8.59e-05
ENSRNOG00000020813	LTBP3	chr1:228032960-228062617	4389	542.956	567.199	1818.28	1755.84	1149.87	1.5987	0.292329	5.46884	4.53e-08	1.47e-06
ENSRNOG00000025843	CCDC102A	chr19:10516255-10531535	2299	331.414	332.695	939.664	1217.09	691.336	1.59814	0.3219	4.96472	6.88e-07	1.43e-05
ENSRNOG00000002050	IGFBP7	chr14:32803850-32901277	1102	6419.95	6841.04	19319.4	23342.6	13711.7	1.59727	0.285526	5.59414	2.22e-08	8.24e-07
ENSRNOG00000020456	NUCB2	chr1:192078546-192114979	1615	1119.24	1519.08	4203	4346.74	2746.06	1.59719	0.317621	5.02859	4.94e-07	1.1e-05
ENSRNOG00000031849	RGD1310110	chr15:30512208-30604270	3128	92.3089	49.6732	244.199	236.316	152.566	1.59706	0.453061	3.52505	0.000423407	0.0032755
ENSRNOG00000008837	ASS1	chr3:15686794-15728491	1492	76.283	92.4153	286.368	269.376	177.516	1.59615	0.388455	4.10896	3.97e-05	0.000444139
ENSRNOG00000001055	RILPL1	chr12:39361409-39398925	2030	175.002	182.52	511.686	656.297	373.999	1.59588	0.343501	4.64592	3.39e-06	5.56e-05
ENSRNOG00000019573	LCAT	chr19:48780368-48783847	1363	74.3599	53.1388	179.373	248.56	135.889	1.59555	0.440255	3.62416	0.000289901	0.00238452
ENSRNOG00000001227	ADARB1	chr20:14137259-14264944	6391	140.386	210.245	555.742	596.299	368.588	1.59508	0.374507	4.25914	2.05e-05	0.000253545
ENSRNOG00000027175	CNPY4	chr12:21386611-21392755	1494	375.646	447.059	1331.14	1324.84	854.008	1.59507	0.309795	5.14879	2.62e-07	6.49e-06
ENSRNOG00000001103	SDK1	chr12:16473808-16728950	4919	27.5645	53.1388	178.744	106.526	90.3386	1.59234	0.543093	2.93199	0.00336801	0.0183067
ENSRNOG00000028930	DAB2	chr2:75489434-75510919	2495	175.643	510.594	1790.59	673.439	777.608	1.59215	0.570595	2.79034	0.00526528	0.0264207
ENSRNOG00000000251	ST6GALNAC1	chr10:105374444-105384844	2432	15.3848	21.9486	87.4838	50.2018	42.8215	1.5916	0.612318	2.5993	0.00934143	0.0423124
ENSRNOG00000000699	SELPLG	chr12:50359788-50361080	1266	172.438	246.056	893.09	500.794	446.198	1.59138	0.432018	3.6836	0.000229962	0.00195441
ENSRNOG00000014230	MAP1A	chr3:119797485-119811427	10110	210.259	201.003	548.819	792.209	429.073	1.59005	0.356368	4.46183	8.13e-06	0.000117435
ENSRNOG00000012049	SOX7	chr15:51053092-51059854	3282	49.3596	136.313	373.852	271.824	204.405	1.58552	0.529106	2.99661	0.00272998	0.0153884
ENSRNOG00000001367	GPC2	chr12:21649635-21655969	2611	29.4876	27.7246	96.2951	100.404	62.0565	1.58542	0.502151	3.15725	0.00159265	0.00988505
ENSRNOG00000039856	LRRC73	chr9:16007853-16010854	1298	16.6669	31.1902	70.4906	102.852	54.1172	1.58356	0.575799	2.7502	0.00595595	0.0291632
ENSRNOG00000004566	ARHGEF15	chr10:55274615-55287136	3653	117.309	125.916	366.299	421.205	252.606	1.58192	0.355251	4.45297	8.47e-06	0.000121418
ENSRNOG00000022432	TMEM59L	chr16:20547482-20551145	1409	25.6414	30.035	76.155	119.995	61.6711	1.58182	0.533316	2.96601	0.00301695	0.016723
ENSRNOG00000019653	CSRNP2	chr7:139923805-139939644	4544	73.0779	92.4153	262.451	277.947	172.994	1.58011	0.392433	4.02646	5.66e-05	0.000599058
ENSRNOG00000047606	BCL2A1	chr8:96059039-96067299	699	730.779	471.318	2005.83	1861.14	1244.11	1.57983	0.349472	4.52063	6.17e-06	9.23e-05
ENSRNOG00000010635	IGFBP4	chr10:86747475-86759481	2160	6052.64	9085.58	21477	27454.3	15708.9	1.57962	0.346854	4.55413	5.26e-06	8.09e-05
ENSRNOG00000000231	KCTD17	chr7:119637882-119648656	1634	201.926	158.261	491.546	674.663	374.015	1.57852	0.366096	4.31177	1.62e-05	0.000209521
ENSRNOG00000012172	SPI1	chr3:86627763-86646458	1340	760.907	616.872	2074.44	2310.51	1413.38	1.57843	0.30344	5.20177	1.97e-07	5.13e-06
ENSRNOG00000001425	SH2B2	chr12:25473619-25501386	2806	351.287	173.279	860.362	862.002	550.825	1.57832	0.418308	3.77309	0.000161236	0.00145245
ENSRNOG00000033528	TLL1	chr16:27269833-27466134	4726	32.0517	33.5005	144.757	83.2615	72.3578	1.57537	0.531783	2.96243	0.00305224	0.016848
ENSRNOG00000039754	RAB7B	chr13:53536347-53553149	1229	28.2055	41.5869	177.485	73.4661	78.8982	1.57504	0.585579	2.68971	0.00715136	0.0338874
ENSRNOG00000011321	RFTN1	chr9:11679881-11880237	2804	688.47	586.837	1912.69	2128.07	1303.85	1.5744	0.297888	5.2852	1.26e-07	3.5e-06
ENSRNOG00000028460	LRRC8E	chr12:4710046-4721276	2997	29.4876	54.294	151.681	132.239	90.1657	1.57407	0.507927	3.09901	0.00194168	0.0116254
ENSRNOG00000026672	MGC94199	chr5:28873220-28892513	2017	176.284	172.123	576.512	532.629	358.009	1.57233	0.332443	4.72962	2.25e-06	3.92e-05
ENSRNOG00000026644	GLIPR1	chr7:54792115-54803129	1005	826.293	1008.48	2626.4	3208.02	1880.35	1.57204	0.311652	5.04422	4.55e-07	1.03e-05
ENSRNOG00000010266	CD180	chr2:51958963-51971767	2566	96.7961	50.8284	364.411	149.381	162.853	1.57095	0.551511	2.84845	0.00439334	0.0228563
ENSRNOG00000016288	TCEA2	chr3:180896672-180904401	1072	55.1289	42.7421	132.17	195.909	104.278	1.5705	0.466025	3.36998	0.000751725	0.00527221
ENSRNOG00000017065	ARHGAP28	chr9:115546747-115711949	3549	45.5134	78.553	233.5	183.665	133.488	1.57027	0.468577	3.35113	0.000804811	0.00557474
ENSRNOG00000015476	UBXN11	chr5:156019008-156042873	1547	25.0003	15.0175	57.2736	86.9348	45.0056	1.57015	0.593399	2.64603	0.00814434	0.037795
ENSRNOG00000005326	CNRIP1	chr14:100291060-100320330	1449	194.874	184.831	607.352	601.197	389.775	1.56991	0.324834	4.83295	1.35e-06	2.51e-05
ENSRNOG00000020803	MEOX1	chr10:89590581-89609632	1871	102.565	154.796	419.167	417.532	268.843	1.56949	0.388924	4.03545	5.45e-05	0.000580301
ENSRNOG00000020300	LSP1	chr1:222524161-222557294	1409	2707.73	1985.77	6734.99	8160.85	4801.84	1.56919	0.318246	4.93076	8.19e-07	1.66e-05
ENSRNOG00000015816	BBS7	chr2:142898505-142938346	2694	116.668	112.054	402.174	331.822	236.599	1.56584	0.368579	4.24833	2.15e-05	0.00026488
ENSRNOG00000046254	EMR1	chr9:8434334-8593090	3229	1378.86	1346.95	5012.38	3610.86	2790.66	1.56577	0.325861	4.805	1.55e-06	2.84e-05
ENSRNOG00000013653	PDLIM7	chr17:11762294-11777443	1692	1258.99	1454.39	3765.58	4813.25	2768.29	1.56501	0.307416	5.09085	3.56e-07	8.36e-06
ENSRNOG00000005871	IL1RN	chr3:1456035-1461446	1909	398.723	1029.28	3058.79	1752.17	1536.83	1.56255	0.498451	3.13481	0.00171963	0.0104951
ENSRNOG00000020533	HTRA1	chr1:208531987-208581539	2038	2623.11	3423.99	8919.57	10140.8	6160.18	1.5604	0.309478	5.04203	4.61e-07	1.04e-05
ENSRNOG00000016281	COL4A1	chr16:82987856-83097435	6579	11332.8	16039.8	45812.6	40712.4	27984.6	1.56007	0.327498	4.7636	1.9e-06	3.38e-05
ENSRNOG00000016362	GPR4	chr1:81401779-81403267	1488	145.515	150.175	404.691	539.975	304.116	1.55938	0.358951	4.34427	1.4e-05	0.00018472
ENSRNOG00000015175	DHH	chrX:115082777-115088273	2479	28.2055	28.8798	84.9663	107.75	61.2608	1.55699	0.511143	3.0461	0.00231831	0.013476
ENSRNOG00000013631	SLC31A2	chr5:82242402-82252910	1765	204.49	244.901	740.151	678.337	458.573	1.55697	0.33413	4.65976	3.17e-06	5.27e-05
ENSRNOG00000020524	THBS3	chr2:207943472-207955131	2865	150.002	144.399	543.155	393.043	302.429	1.55532	0.374533	4.15269	3.29e-05	0.000379282
ENSRNOG00000016575	TNFRSF1B	chr5:166812969-166845910	5296	564.751	740.478	2113.46	1988.48	1327.77	1.55438	0.320202	4.85437	1.21e-06	2.29e-05
ENSRNOG00000014124	NOD2	chr19:30375243-30409527	3367	37.18	58.9147	167.415	150.605	101.694	1.55409	0.472871	3.28649	0.00101443	0.00676302
ENSRNOG00000028703	SLC39A6	chr18:16282422-16302964	3036	167.31	353.488	945.329	751.803	545.143	1.55077	0.443678	3.49526	0.000473604	0.00359697
ENSRNOG00000016488	PLTP	chr3:167481587-167507385	2025	3095.55	2301.14	7884.24	8970.2	5456.54	1.55028	0.309737	5.00516	5.58e-07	1.21e-05
ENSRNOG00000005695	MGP	chr4:235113771-235117160	590	6500.72	7246.51	19512	23217.7	13852.3	1.54819	0.287446	5.38601	7.2e-08	2.2e-06
ENSRNOG00000011394	KIF3C	chr6:37579444-37625883	3419	26.9234	45.0525	152.31	93.057	78.0272	1.54685	0.540571	2.86152	0.00421618	0.0220133
ENSRNOG00000013694	NTNG2	chr3:13091082-13144474	2174	105.13	105.122	410.985	262.029	217.259	1.54611	0.416114	3.7156	0.000202719	0.00175984
ENSRNOG00000028685	SHF	chr3:120827511-120837367	720	30.7696	18.4831	86.2251	82.0371	53.2301	1.54579	0.554711	2.78665	0.00532557	0.0266886
ENSRNOG00000016733	RAB13	chr2:209014515-209019148	997	1017.96	962.274	2702.56	3456.58	1995.36	1.54523	0.30159	5.12361	3e-07	7.21e-06
ENSRNOG00000011971	C1S	chr4:224162095-224174113	2912	7127.65	6335.07	20656.2	20860.7	13494.7	1.54357	0.275846	5.59577	2.2e-08	8.18e-07
ENSRNOG00000004503	L3HYPDH	chr6:104268770-104279567	1837	50.0006	70.4667	153.569	239.989	125.868	1.54286	0.464332	3.32276	0.000891314	0.0060757
ENSRNOG00000007611	HOXB7	chr10:83937955-83941372	1211	127.566	123.605	351.194	444.47	256.652	1.54285	0.361125	4.27234	1.93e-05	0.000242488
ENSRNOG00000012582	EIF4EBP1	chr16:68580279-68593651	829	937.832	996.93	2480.39	3566.78	1955.55	1.54155	0.325443	4.73676	2.17e-06	3.8e-05
ENSRNOG00000010031	VTN	chr10:65872581-65875673	1608	106.412	64.6907	222.8	331.822	177.703	1.54136	0.447013	3.44813	0.000564489	0.00414979
ENSRNOG00000028801	GSAP	chr4:10416404-10511054	3088	206.413	179.055	644.485	557.118	389.582	1.54011	0.339313	4.5389	5.65e-06	8.62e-05
ENSRNOG00000019422	EGR1	chr18:27369165-27372951	3114	957.063	1616.11	3592.5	4562.24	2630.77	1.5401	0.375632	4.10001	4.13e-05	0.000458696
ENSRNOG00000037268	SCARF1	chr10:64331641-64343951	2866	360.902	318.833	948.476	1166.89	685.239	1.53997	0.318349	4.83738	1.32e-06	2.47e-05
ENSRNOG00000046313	AABR06014093.1	chr2:97311485-97312150	665	165.387	264.539	777.284	591.402	442.181	1.53964	0.400704	3.84234	0.000121865	0.00114285
ENSRNOG00000014911	RGD1310081	chr2:78935590-78957358	1579	41.0262	58.9147	136.575	191.012	104.875	1.5388	0.470507	3.27052	0.00107349	0.00709186
ENSRNOG00000002309	HLX	chr13:107315403-107320809	2112	379.492	307.281	913.23	1230.56	693.397	1.53862	0.339484	4.53224	5.84e-06	8.83e-05
ENSRNOG00000012721	EDNRA	chr19:44812397-44874904	4595	313.466	487.491	1389.67	1131.38	816.448	1.5383	0.373203	4.12189	3.76e-05	0.000424003
ENSRNOG00000020202	ASRGL1	chr1:232246222-232267037	2088	81.4113	85.4841	241.682	282.844	169.47	1.53633	0.385475	3.98556	6.73e-05	0.000696014
ENSRNOG00000016467	KCTD1	chr18:6337409-6378501	781	28.8465	32.3454	87.4838	116.321	64.684	1.53599	0.50771	3.02533	0.00248363	0.0142831
ENSRNOG00000013917	IGSF10	chr2:168967574-168996281	8817	542.956	484.025	1684.22	1481.57	1029.95	1.53526	0.305521	5.02504	5.03e-07	1.11e-05
ENSRNOG00000007827	COX4I2	chr3:154637662-154648535	704	172.438	158.261	414.132	625.686	335.489	1.53374	0.376058	4.07847	4.53e-05	0.00049614
ENSRNOG00000022884	CD84	chr13:94797091-94800870	630	27.5645	48.518	176.226	86.9348	83.7828	1.53348	0.56578	2.71038	0.00672066	0.0320983
ENSRNOG00000049351	NAT8L	chr14:82725855-82732491	3279	19.872	12.7071	57.2736	58.7728	36.5317	1.53346	0.603672	2.54023	0.0110781	0.0485481
ENSRNOG00000010068	PPAPDC3	chr3:16467144-16481233	1965	60.8982	46.2076	137.834	209.378	111.137	1.52938	0.464347	3.29361	0.000989103	0.00663777
ENSRNOG00000009311	FSTL3	chr7:12975138-12980781	1888	130.13	202.158	398.398	666.092	341.806	1.52814	0.429331	3.55936	0.000371759	0.00292884
ENSRNOG00000033699	RGD1561306	chr4:212473337-212823540	1085	367.953	279.556	1081.9	917.101	650.232	1.52579	0.338709	4.50472	6.65e-06	9.82e-05
ENSRNOG00000021338	TMEM132A	chr1:233978359-233989649	3066	321.158	458.611	1307.85	1113.01	786.756	1.5255	0.35324	4.31858	1.57e-05	0.000204201
ENSRNOG00000021644	SLC15A3	chr1:233963401-233978192	1958	371.8	263.384	951.622	1007.71	636.627	1.52418	0.340094	4.48165	7.41e-06	0.00010811
ENSRNOG00000022975	NFAM1	chr7:123842486-123861991	696	35.8979	47.3628	183.15	93.057	88.441	1.5238	0.535038	2.84802	0.00439922	0.0228788
ENSRNOG00000003999	ADCY3	chr6:38378059-38454925	4611	207.054	214.866	669.031	628.135	422.167	1.52329	0.324032	4.70104	2.59e-06	4.42e-05
ENSRNOG00000019651	SLC12A4	chr19:48784044-48805888	3724	389.749	413.558	1280.16	1179.13	801.479	1.52311	0.304585	5.00061	5.71e-07	1.23e-05
ENSRNOG00000015641	EXOC3L1	chr19:48110991-48116641	2511	158.335	138.623	405.321	514.262	298.079	1.51869	0.355786	4.26854	1.97e-05	0.000245395
ENSRNOG00000013564	DOK3	chr17:11748065-11752826	1527	444.236	184.831	929.594	1071.38	644.513	1.51585	0.452553	3.34956	0.000809402	0.0055959
ENSRNOG00000007476	CLMP	chr8:46020807-46148061	3901	1230.78	1359.66	3650.4	4219.4	2566.24	1.5153	0.290068	5.22393	1.75e-07	4.62e-06
ENSRNOG00000008133	MFNG	chr7:119970578-119988416	1770	294.876	188.296	645.114	855.88	486.06	1.5148	0.382546	3.95979	7.5e-05	0.000765248
ENSRNOG00000014961	PDPN	chr5:165646113-165679595	1852	698.727	802.858	2408.01	2151.33	1489.17	1.5129	0.302944	4.994	5.91e-07	1.26e-05
ENSRNOG00000006231	PTPRO	chr4:235508259-235718672	4864	213.464	359.264	1076.24	717.518	582.35	1.51243	0.419225	3.60767	0.000308956	0.00251835
ENSRNOG00000042980	ADAM19	chr10:30966981-31059793	6286	918.601	1411.64	3963.21	3210.47	2336.84	1.51115	0.35973	4.20078	2.66e-05	0.00031839
ENSRNOG00000039976	PTK7	chr9:15569248-15634049	3081	153.207	477.094	1330.51	754.251	668.964	1.51079	0.538603	2.80502	0.0050313	0.0254704
ENSRNOG00000011346	EHD2	chr1:79112279-79130529	2027	589.11	855.997	2622	1832.98	1451.76	1.50962	0.374199	4.03427	5.48e-05	0.000582817
ENSRNOG00000007151	CDK14	chr4:25732185-26326121	4582	51.2827	181.365	538.12	254.682	252.763	1.50805	0.59431	2.53747	0.0111655	0.0489032
ENSRNOG00000003407	PTPN14	chr13:113312813-113456734	4165	19.872	28.8798	90.6307	72.2416	52.1087	1.50603	0.553441	2.72122	0.00650423	0.0313628
ENSRNOG00000047768	LAMB2	chr8:116613076-116625217	5581	1244.89	1192.16	3539.63	3781.05	2394.86	1.50469	0.279518	5.38318	7.32e-08	2.23e-06
ENSRNOG00000000596	FYN	chr20:46160782-46353457	3552	777.574	646.907	2360.17	1944.4	1407.81	1.50417	0.316267	4.75603	1.97e-06	3.5e-05
ENSRNOG00000019752	SLC29A1	chr9:16570773-16769589	2115	162.182	98.1912	330.424	483.652	262.954	1.50411	0.42577	3.53269	0.000411358	0.00320099
ENSRNOG00000019612	HAGHL	chr10:14965680-14968346	1222	26.9234	23.1038	76.7844	86.9348	52.4734	1.50353	0.530888	2.8321	0.00462434	0.0238115
ENSRNOG00000001480	NCF1	chr12:27505792-27514989	2758	1899.38	1519.08	5567.49	4729.99	3369.59	1.50291	0.308975	4.86418	1.15e-06	2.2e-05
ENSRNOG00000018356	TRIM3	chr1:177447513-177470193	2863	319.876	381.213	993.791	1128.93	692.963	1.50218	0.318131	4.72189	2.34e-06	4.04e-05
ENSRNOG00000029792	OGN	chr17:17488157-17661428	2650	535.904	486.335	1609.95	1461.97	1005.61	1.50091	0.301173	4.98354	6.24e-07	1.32e-05
ENSRNOG00000006827	TMEM198B	chr7:3196402-3200737	2637	113.463	103.967	294.55	371.004	216.481	1.50052	0.372619	4.02697	5.65e-05	0.000599021
ENSRNOG00000001869	RAB44	chr20:8642479-8655402	2169	17.9489	30.035	100.071	62.4461	51.6884	1.49901	0.586523	2.55576	0.0105956	0.0468891
ENSRNOG00000000341	NID2	chr15:8984787-9041180	4752	857.062	1006.17	2608.78	2988.84	1830.78	1.49718	0.299606	4.99715	5.82e-07	1.24e-05
ENSRNOG00000016213	SSBP2	chr2:20379436-20574043	1575	255.772	286.487	806.865	826.493	533.998	1.49717	0.315703	4.74232	2.11e-06	3.72e-05
ENSRNOG00000019128	ST8SIA4	chr9:102730313-102820583	1365	26.9234	32.3454	130.911	64.895	62.8225	1.49568	0.570509	2.62166	0.00875033	0.040071
ENSRNOG00000002981	CACNA1G	chr10:81951132-82017400	6955	63.4623	95.8809	278.815	216.725	161.073	1.49459	0.438287	3.41008	0.000649427	0.0046625
ENSRNOG00000019243	GLB1L	chr9:82169829-82180165	2306	126.925	146.709	444.342	388.146	271.775	1.49353	0.359496	4.1545	3.26e-05	0.000376591
ENSRNOG00000031834	NKAIN4	chr3:180154360-180174989	732	41.0262	19.6382	101.96	97.9547	64.0249	1.49282	0.550087	2.71378	0.00665202	0.0318492
ENSRNOG00000003121	RTN4RL1	chr10:61748819-61822593	3283	145.515	122.45	436.79	375.901	265.571	1.4927	0.362615	4.11648	3.85e-05	0.000432074
ENSRNOG00000049075	FABP5	chr2:113735165-113738835	670	1624.38	1955.74	5380.57	5307.92	3504.42	1.49127	0.294358	5.06618	4.06e-07	9.33e-06
ENSRNOG00000010691	CMTM3	chr19:829212-836125	1564	1067.96	821.341	2668.57	2983.95	1850.17	1.49097	0.309011	4.82497	1.4e-06	2.6e-05
ENSRNOG00000002730	RGS5	chr13:92595345-92631357	546	118.591	168.658	465.112	413.859	286.784	1.49077	0.380751	3.91535	9.03e-05	0.000890318
ENSRNOG00000011668	NFIL3	chr17:14372305-14374095	1790	389.749	675.787	1436.87	1830.53	1063.12	1.48917	0.387945	3.83861	0.000123734	0.00115689
ENSRNOG00000010626	SPHK1	chr10:105165073-105167961	1674	249.362	250.676	624.345	888.939	493.27	1.48879	0.348558	4.27128	1.94e-05	0.000243344
ENSRNOG00000007254	TTC9	chr6:113510908-113545657	2025	67.9496	79.7082	241.053	213.052	147.913	1.488	0.40496	3.67443	0.000238378	0.00201435
ENSRNOG00000005625	ZC4H2	chrX:68162937-68183409	2145	128.848	159.416	424.202	446.918	284.528	1.4875	0.355185	4.18796	2.81e-05	0.000333085
ENSRNOG00000021004	RASIP1	chr1:102689552-102700426	2328	421.159	421.645	1163.09	1353	824.065	1.48743	0.302694	4.91398	8.92e-07	1.78e-05
ENSRNOG00000002041	BOC	chr11:65191759-65266747	4412	385.261	373.127	1135.4	1121.58	740.317	1.48683	0.299945	4.95701	7.16e-07	1.48e-05
ENSRNOG00000024751	H2AFY2	chr20:33152564-33200486	1945	148.72	132.847	360.635	494.671	278.877	1.48595	0.36947	4.02183	5.77e-05	0.000608679
ENSRNOG00000032487	STS	chrX:45646095-45654126	2457	173.72	118.985	498.469	390.595	290.472	1.48255	0.392221	3.77988	0.000156907	0.00142143
ENSRNOG00000016608	ZFP579	chr1:76133749-76136920	2143	166.028	121.295	412.873	453.041	282.851	1.48201	0.366662	4.04191	5.3e-05	0.000568289
ENSRNOG00000038480	PPP1R36	chr6:108854060-108874065	1440	141.027	162.882	438.048	475.08	298.714	1.48125	0.346258	4.27786	1.89e-05	0.000238193
ENSRNOG00000005690	LMCD1	chr4:207494654-207554217	1660	251.926	325.764	842.74	885.266	566.189	1.47944	0.332964	4.44325	8.86e-06	0.000125931
ENSRNOG00000017604	FAM65A	chr19:48445031-48452707	3999	451.929	417.024	1355.68	1215.86	845.357	1.47798	0.305332	4.84056	1.29e-06	2.43e-05
ENSRNOG00000002946	SOCS3	chr10:106612941-106613619	678	128.848	235.659	823.229	336.719	376.271	1.47741	0.517886	2.85278	0.00433391	0.0225633
ENSRNOG00000012206	DENND5A	chr1:181508455-181572938	4928	785.907	918.377	2750.39	2294.59	1659.08	1.47565	0.31247	4.72253	2.33e-06	4.04e-05
ENSRNOG00000042620	MARVELD1	chr1:268843549-268845919	1209	578.854	622.648	1620.65	1934.61	1167.26	1.47495	0.301139	4.89791	9.69e-07	1.91e-05
ENSRNOG00000028585	TCEAL8	chrX:106411718-106413855	1116	1213.48	1262.62	3626.49	3652.49	2395.14	1.47405	0.280212	5.26048	1.44e-07	3.91e-06
ENSRNOG00000019048	SOD2	chr1:51827379-51834230	2063	3228.25	4159.84	10815.3	11010.1	7174.3	1.47296	0.3031	4.85965	1.18e-06	2.24e-05
ENSRNOG00000027550	MZF1	chr1:66333350-66344445	3603	63.4623	40.4317	149.792	168.972	103.481	1.47189	0.463388	3.17637	0.00149131	0.00939209
ENSRNOG00000017116	ZFP532	chr18:60458274-60565220	5998	196.797	271.47	768.473	630.584	459.046	1.46987	0.364137	4.03657	5.42e-05	0.000577968
ENSRNOG00000021015	SBSN	chr1:90357211-90361688	669	123.078	47.3628	195.108	351.413	175.021	1.4696	0.539982	2.72158	0.00649716	0.0313391
ENSRNOG00000011161	SLC2A12	chr1:25467854-25520421	4118	26.2824	31.1902	73.0081	110.199	58.781	1.46947	0.534435	2.74957	0.00596737	0.0292092
ENSRNOG00000014156	FUT7	chr3:2625022-2627899	2068	35.2569	26.5694	87.4838	108.975	63.2328	1.46849	0.511129	2.87303	0.00406557	0.0214344
ENSRNOG00000028041	TNNT1	chr1:75652124-75660589	890	21.7951	25.4142	78.6725	72.2416	48.6272	1.46838	0.54354	2.70151	0.00690259	0.0328595
ENSRNOG00000031743	GBP2	chr2:266805233-266821133	2395	1250.66	969.205	2447.03	4224.3	2176	1.46818	0.375363	3.91135	9.18e-05	0.000903349
ENSRNOG00000005039	TFPI	chr3:78373813-78414596	1226	411.544	459.766	1086.31	1502.38	848.167	1.46735	0.332736	4.40995	1.03e-05	0.00014276
ENSRNOG00000013922	DOK2	chr15:56176050-56179111	1594	121.155	144.399	519.238	287.742	264.06	1.46659	0.437999	3.34839	0.000812827	0.00561691
ENSRNOG00000020193	RUNX2	chr9:17205631-17658363	5664	219.875	286.487	718.123	778.74	491.737	1.46243	0.339	4.31395	1.6e-05	0.000207828
ENSRNOG00000008951	RASL10A	chr14:85986063-85995815	974	34.6158	27.7246	86.8544	111.424	63.9659	1.46214	0.508617	2.87474	0.00404362	0.0213341
ENSRNOG00000023812	RAVER2	chr5:123786081-123863622	2452	29.4876	28.8798	96.2951	85.7104	58.9479	1.46057	0.511286	2.85665	0.00428137	0.0223297
ENSRNOG00000020652	TGFB1	chr1:83742150-83758471	1456	763.471	810.944	2399.83	2186.84	1513.8	1.45905	0.293403	4.97285	6.6e-07	1.38e-05
ENSRNOG00000023485	USHBP1	chr16:19641399-19651953	2468	161.541	174.434	500.357	488.549	325.42	1.45841	0.335985	4.3407	1.42e-05	0.000187232
ENSRNOG00000027357	SOX17	chr5:19675584-19681084	2326	190.387	179.055	622.457	467.734	358.788	1.45799	0.359419	4.05652	4.98e-05	0.000540251
ENSRNOG00000016414	SLC22A17	chr15:37456777-37463273	2344	364.107	214.866	774.137	950.161	564.545	1.45594	0.385755	3.77427	0.000160474	0.00144745
ENSRNOG00000006108	GNGT2	chr10:83459561-83462703	553	428.852	362.73	1100.79	1209.74	761.465	1.45535	0.308884	4.71165	2.46e-06	4.24e-05
ENSRNOG00000012516	C7	chr2:73735308-73802191	4659	8461.65	7333.15	21529.2	24257.3	15110.6	1.4538	0.282024	5.15488	2.54e-07	6.32e-06
ENSRNOG00000021170	PLEKHO1	chr2:217601896-217609978	1452	980.782	671.166	2219.19	2626.41	1593.31	1.45358	0.336654	4.31774	1.58e-05	0.000204661
ENSRNOG00000013027	RGL3	chr8:23035691-23055269	2606	18.59	33.5005	90.0013	79.5882	54.7978	1.45327	0.559096	2.59932	0.00934091	0.0423124
ENSRNOG00000004489	CD97	chr19:35834143-35853867	3013	907.063	680.408	2155.63	2474.58	1525.33	1.45296	0.317261	4.57968	4.66e-06	7.27e-05
ENSRNOG00000030210	FNDC1	chr1:48905801-48987223	5340	218.593	180.21	786.725	411.41	393.383	1.45202	0.433839	3.34691	0.000817184	0.00563234
ENSRNOG00000043128	ARMCX4	chrX:105389525-105396644	7035	84.6165	185.986	555.742	288.966	275.11	1.45182	0.514721	2.82061	0.00479332	0.024474
ENSRNOG00000016338	FAM92A1	chr5:30436530-30454713	1068	148.72	182.52	500.357	476.305	321.338	1.45131	0.349833	4.14858	3.35e-05	0.000384941
ENSRNOG00000046330	RNF130	chr10:35306179-35372337	1198	792.959	758.961	2300.38	2186.84	1483.38	1.44968	0.287659	5.03957	4.67e-07	1.04e-05
ENSRNOG00000007437	IRF5	chr4:56572292-56583432	2099	367.312	247.211	969.874	831.391	593.287	1.44849	0.360112	4.02234	5.76e-05	0.000608258
ENSRNOG00000008245	PTGIS	chr3:170109318-170249262	1488	436.544	199.848	852.18	1065.26	625.833	1.44791	0.437304	3.311	0.000929638	0.00630187
ENSRNOG00000020679	ICAM1	chr8:22092134-22103927	2632	580.777	482.87	1483.45	1596.66	1017.06	1.44614	0.303615	4.76308	1.91e-06	3.39e-05
ENSRNOG00000003833	NENF	chr13:114555780-114562973	654	832.062	675.787	1632.61	2819.87	1459.13	1.44405	0.375029	3.85049	0.00011788	0.00111359
ENSRNOG00000016967	HFE	chr17:45494207-45655399	1406	67.9496	67.0011	180.003	221.623	131.7	1.44219	0.411572	3.50409	0.000458175	0.0034955
ENSRNOG00000017021	GALNT18	chr1:183278638-183588615	2508	125.643	128.226	410.356	334.271	245.346	1.44218	0.367217	3.92731	8.59e-05	0.000852988
ENSRNOG00000008215	TRIM47	chr10:103626182-103630654	2198	467.955	388.144	1070.58	1416.67	819.782	1.44125	0.329962	4.36794	1.25e-05	0.000167776
ENSRNOG00000000816	PPP1R18	chr20:5466493-5494142	2632	1201.94	1030.43	3212.98	3201.9	2123.28	1.44114	0.288946	4.98758	6.11e-07	1.29e-05
ENSRNOG00000002881	DDR2	chr13:92942667-92987943	3507	123.078	124.761	313.431	416.308	239.539	1.44061	0.371498	3.87783	0.00010539	0.00100935
ENSRNOG00000017428	MAP1B	chr2:48837123-48930483	11866	283.978	381.213	994.42	939.141	638.379	1.4395	0.338041	4.25835	2.06e-05	0.000254228
ENSRNOG00000023317	COLGALT1	chr16:19900824-19913462	3012	967.961	1252.23	3523.27	2901.91	2125.8	1.43897	0.3264	4.40862	1.04e-05	0.000143505
ENSRNOG00000002347	RGL1	chr13:74881864-75145652	3996	122.437	220.642	641.968	390.595	338.936	1.43841	0.458227	3.13909	0.00169473	0.010364
ENSRNOG00000047247	PTPRS	chr9:9596329-9638569	6490	668.598	834.048	2209.75	2124.39	1434.09	1.43804	0.30922	4.65054	3.31e-06	5.47e-05
ENSRNOG00000050190	ENG	chr3:17021959-17058548	2604	1345.53	1574.53	4152.02	4224.3	2774.61	1.43553	0.290708	4.93804	7.89e-07	1.61e-05
ENSRNOG00000046535	PPM1M	chr8:114252463-114256314	1218	114.104	137.468	433.013	304.884	243.359	1.43518	0.398413	3.60224	0.000315486	0.00255884
ENSRNOG00000004249	TLR7	chrX:28883040-28908313	3466	95.514	137.468	557.631	172.645	238.098	1.43507	0.558759	2.56831	0.0102195	0.0455811
ENSRNOG00000021137	KCTD15	chr1:91645832-91659091	2418	318.594	362.73	986.238	975.874	649.447	1.43425	0.311485	4.60456	4.13e-06	6.58e-05
ENSRNOG00000009401	LMO2	chr3:100560597-100572022	1622	598.085	538.319	1781.15	1479.12	1080.57	1.43363	0.312037	4.59442	4.34e-06	6.84e-05
ENSRNOG00000004532	FAM69B	chr3:9442975-9450728	1542	100.001	78.553	227.206	301.211	173.296	1.43286	0.404366	3.54348	0.000394878	0.00308428
ENSRNOG00000027491	VLDLR	chr1:252487249-252518719	3417	155.771	240.28	497.21	669.766	383.337	1.43278	0.393719	3.63909	0.000273602	0.00226492
ENSRNOG00000050404	PMEPA1	chr3:177360058-177366886	693	158.976	313.057	645.114	760.374	460.76	1.43223	0.425709	3.36433	0.000767284	0.00536326
ENSRNOG00000026964	GAS8	chr19:67025620-67045030	1575	26.2824	26.5694	86.2251	78.3638	53.301	1.43211	0.526413	2.7205	0.00651835	0.0314085
ENSRNOG00000011740	KDELC1	chr9:50539117-50551705	2582	273.08	295.729	814.418	820.371	541.051	1.43142	0.312806	4.57606	4.74e-06	7.37e-05
ENSRNOG00000010331	CTSB	chr15:50081534-50102406	1942	20968.2	20126.9	60998.9	55869.7	38812.9	1.43005	0.276474	5.17247	2.31e-07	5.83e-06
ENSRNOG00000021031	GRN	chr10:90165633-90171736	2165	4221.85	5250.34	14500.3	12620.2	8995.45	1.43002	0.306353	4.6679	3.04e-06	5.1e-05
ENSRNOG00000001584	MAP3K7CL	chr11:30834011-30877227	1648	29.4876	41.5869	113.918	102.852	70.7695	1.42979	0.502837	2.84344	0.00446299	0.0231361
ENSRNOG00000042741	ADGB	chr1:6109840-6231640	4920	26.2824	19.6382	74.2668	69.7927	46.6418	1.42948	0.552799	2.58589	0.00971273	0.0436953
ENSRNOG00000004730	MEIS2	chr3:114124746-114324924	2813	183.977	184.831	572.736	489.774	351.975	1.42861	0.340482	4.19585	2.72e-05	0.000324066
ENSRNOG00000017354	ZYX	chr4:136544929-136568077	2558	3034.01	3443.62	8090.68	10448.1	6136.27	1.42674	0.303266	4.7046	2.54e-06	4.36e-05
ENSRNOG00000002035	PAQR3	chr14:14051458-14068707	1857	26.2824	21.9486	64.1968	85.7104	48.5162	1.4251	0.551095	2.58594	0.00971132	0.0436953
ENSRNOG00000021017	CAR11	chr1:102761011-102766123	1322	101.283	50.8284	198.884	257.131	148.973	1.42308	0.474674	2.99802	0.00271743	0.0153548
ENSRNOG00000010466	CHPF2	chr4:7120978-7126436	3758	391.672	488.646	1259.39	1258.72	834.962	1.4228	0.317052	4.48759	7.2e-06	0.000105779
ENSRNOG00000037853	RARRES1	chr2:184000124-184034599	1335	730.779	480.56	1931.57	1552.58	1154.39	1.42228	0.358919	3.96268	7.41e-05	0.000758145
ENSRNOG00000007894	MPDZ	chr5:103442808-103596543	7497	132.053	187.141	506.021	418.756	305.914	1.42005	0.383566	3.70222	0.000213723	0.00183351
ENSRNOG00000002418	TGFB2	chr13:109681281-109791576	2865	62.1803	102.812	263.71	224.071	160.566	1.41892	0.443578	3.19881	0.00137994	0.00875334
ENSRNOG00000010237	MAP7D1	chr5:148018368-148042648	3284	1494.25	1522.54	4142.58	4377.35	2832.82	1.41801	0.277828	5.10392	3.33e-07	7.87e-06
ENSRNOG00000006984	MAPK11	chr7:129807475-129814393	2361	42.9493	30.035	105.736	113.872	71.8832	1.41788	0.494356	2.86813	0.00412902	0.0216982
ENSRNOG00000009870	TMEM88	chr10:55735828-55742300	1567	514.75	432.041	999.455	1748.49	904.284	1.41667	0.381538	3.71304	0.000204787	0.00177567
ENSRNOG00000005126	PQLC3	chr6:52010003-52021578	1902	333.338	315.367	1034.07	810.575	613.046	1.41629	0.332496	4.25958	2.05e-05	0.000253373
ENSRNOG00000014243	PEAR1	chr2:206385940-206687513	4467	405.133	473.628	1258.13	1225.66	826.234	1.41012	0.308905	4.56492	5e-06	7.73e-05
ENSRNOG00000019180	ACSL4	chrX:112046206-112109823	4862	339.107	501.353	1411.7	997.914	799.97	1.40705	0.382933	3.67441	0.000238398	0.00201435
ENSRNOG00000042499	TMSB10	chr4:165645782-165646842	472	21727.2	22887.8	53836.5	71809.4	41755.7	1.40514	0.300513	4.6758	2.93e-06	4.92e-05
ENSRNOG00000003076	RBMS2	chr7:2533525-2567969	1283	552.571	653.838	1631.35	1764.41	1130.04	1.40404	0.303686	4.62333	3.78e-06	6.08e-05
ENSRNOG00000018858	MYCT1	chr1:43450908-43461462	1554	35.2569	69.3115	147.275	165.299	102.141	1.40289	0.501476	2.79752	0.00514973	0.0259482
ENSRNOG00000027098	SEZ6L2	chr1:205363569-205383913	4207	71.7958	58.9147	179.373	199.583	125.143	1.4024	0.416784	3.36482	0.000765934	0.00535947
ENSRNOG00000043391	PECAM1	chr10:94598951-94632587	1837	1771.18	1683.11	4372.3	5292	3218.6	1.40096	0.288709	4.85249	1.22e-06	2.3e-05
ENSRNOG00000005720	SPIC	chr7:29331309-29338975	1128	28.2055	25.4142	78.0431	82.0371	52.2751	1.39866	0.527413	2.65193	0.00800332	0.0372236
ENSRNOG00000016062	SNTA1	chr3:156245200-156278466	2096	341.03	360.42	838.963	1139.95	657.189	1.39849	0.332226	4.20946	2.56e-05	0.00030741
ENSRNOG00000021183	RCOR2	chr15:23512964-23580026	2519	84.6165	72.777	195.108	259.58	150.285	1.39703	0.410512	3.40315	0.000666129	0.00475895
ENSRNOG00000038955	MGC105567	chr18:54920889-54939122	2131	68.5906	64.6907	174.968	210.603	127.565	1.39689	0.412929	3.38287	0.000717314	0.00506992
ENSRNOG00000032381	NAGLU	chr10:88777918-88785165	2220	339.107	455.145	1146.1	1089.75	744.639	1.39679	0.334039	4.18151	2.9e-05	0.00034073
ENSRNOG00000012975	GGCX	chr4:165047671-165063176	2310	301.286	427.421	1238.62	835.064	689.868	1.39629	0.387319	3.60502	0.000312132	0.00253729
ENSRNOG00000004763	SIRPA	chr3:127864145-127901869	3855	1081.42	1321.54	3933	2827.22	2255.03	1.39628	0.340935	4.09545	4.21e-05	0.000466399
ENSRNOG00000021213	LIX1L	chr2:218213051-218238919	3548	752.574	1076.64	2661.02	2486.83	1715.17	1.39481	0.334993	4.16371	3.13e-05	0.000364022
ENSRNOG00000002095	ARHGAP24	chr14:8355351-8668071	2843	176.925	191.762	629.38	418.756	348.805	1.39453	0.384692	3.62506	0.000288897	0.00237895
ENSRNOG00000009760	PALM	chr7:12711158-12963915	2589	497.442	517.526	1430.58	1395.85	943.876	1.39441	0.295369	4.72092	2.35e-06	4.06e-05
ENSRNOG00000003763	PRDX4	chrX:43801334-43816646	990	1230.78	1315.76	3061.93	4063.9	2372.47	1.39365	0.308238	4.52136	6.14e-06	9.21e-05
ENSRNOG00000043176	RN50_4_0141.1	chr4:13978088-14221601	1641	166.669	136.313	517.35	345.29	286.683	1.39258	0.398454	3.49496	0.000474127	0.00359836
ENSRNOG00000008010	HOXB5	chr10:83954883-83957092	1534	37.18	27.7246	98.8127	94.2814	63.3499	1.39208	0.506057	2.75083	0.00594448	0.0291168
ENSRNOG00000023546	HSPB1	chr12:25837083-25838661	806	804.497	864.083	1841.57	2863.95	1561.96	1.39199	0.344553	4.04	5.35e-05	0.000571167
ENSRNOG00000021437	HSPG2	chr5:159568697-159668805	6003	1193.6	2111.69	5588.26	3855.74	3139.36	1.39119	0.405319	3.43232	0.000598433	0.00434565
ENSRNOG00000015078	IFITM3	chr1:220730713-220731861	642	4528.9	4296.16	10734.1	13810.4	8184.94	1.39027	0.29459	4.71934	2.37e-06	4.08e-05
ENSRNOG00000024399	CD300A	chr10:103094715-103107421	1195	296.158	332.695	1047.29	722.416	590.231	1.38925	0.362025	3.83745	0.000124319	0.00116012
ENSRNOG00000002358	SCPEP1	chr10:73846393-73880404	2016	3853.9	5234.17	13095.5	12251.7	8464.17	1.38913	0.316439	4.38987	1.13e-05	0.000154619
ENSRNOG00000043286	CPNE2	chr19:10855267-10877311	1647	44.2313	79.7082	223.43	144.483	120.918	1.38874	0.504401	2.75324	0.00590091	0.028952
ENSRNOG00000026238	RGD1562618	chr8:63057199-63067429	1500	70.5137	71.6218	192.59	214.276	135.006	1.38569	0.401994	3.44704	0.000566773	0.00416138
ENSRNOG00000011967	NPHP4	chr5:173212950-173298420	5037	41.6672	50.8284	156.086	115.097	89.5516	1.38499	0.475736	2.91125	0.00359982	0.019327
ENSRNOG00000025324	SPIRE1	chr18:62411828-62542260	5480	232.695	251.832	686.654	659.97	450.135	1.38261	0.321305	4.30312	1.68e-05	0.000216314
ENSRNOG00000001607	ADAMTS1	chr11:28965541-28974878	4841	578.854	1062.78	2603.74	2057.05	1550.95	1.3826	0.401694	3.44193	0.000577587	0.00421268
ENSRNOG00000003120	PRELP	chr13:55802773-55814199	1498	1572.46	1381.61	3952.51	4181.44	2722.53	1.38172	0.283623	4.87169	1.11e-06	2.14e-05
ENSRNOG00000000158	CDO1	chr18:40348060-40362704	1457	217.951	98.1912	329.166	597.524	304.023	1.37989	0.494322	2.79149	0.0052466	0.0263451
ENSRNOG00000013024	CSGALNACT1	chr16:22868156-22963258	3258	128.848	318.833	733.228	571.811	431.431	1.37818	0.48077	2.86661	0.00414898	0.0217796
ENSRNOG00000037339	SIGLEC10	chr1:99589920-99598511	2367	196.797	72.777	441.825	346.515	260.151	1.37703	0.505287	2.72524	0.00642551	0.0310965
ENSRNOG00000006733	SRGAP2	chr13:53149844-53362638	3527	215.387	281.867	762.179	624.461	463.146	1.37699	0.35685	3.85875	0.000113969	0.00108226
ENSRNOG00000019268	PELP1	chr10:56739144-56756177	3443	1010.27	1066.24	2723.33	2979.05	1909.85	1.37654	0.284785	4.83363	1.34e-06	2.51e-05
ENSRNOG00000002387	TCEAL1	chrX:107254189-107256097	1173	69.2316	70.4667	193.22	199.583	130.64	1.37648	0.403898	3.40799	0.00065444	0.00469155
ENSRNOG00000000913	GUSB	chr12:32136117-32164707	2465	696.804	785.53	2241.85	1842.77	1369.37	1.37492	0.313467	4.38617	1.15e-05	0.000156327
ENSRNOG00000001228	POFUT2	chr20:14281733-14292670	2259	1005.78	1214.11	3029.21	3075.78	2045.25	1.37464	0.298001	4.61287	3.97e-06	6.36e-05
ENSRNOG00000012164	LPPR2	chr8:23003382-23013242	1503	23.0772	30.035	85.5957	72.2416	51.8721	1.3732	0.54198	2.53367	0.0112875	0.0493177
ENSRNOG00000043044	CNN2	chr7:12711158-12963915	660	334.62	462.076	1376.45	859.553	747.072	1.37301	0.395076	3.4753	0.000510282	0.00382174
ENSRNOG00000020229	HOMER3	chr16:20733290-20740680	1207	102.565	143.244	406.579	287.742	231.626	1.37297	0.414804	3.30993	0.000933185	0.00631971
ENSRNOG00000046996	PEA15	chr13:95100950-95110571	2304	1652.59	2036.6	4973.99	5151.19	3393.78	1.3713	0.297666	4.60686	4.09e-06	6.52e-05
ENSRNOG00000025796	RGD1306072	chr19:36239994-36260885	2085	55.7699	50.8284	146.646	156.728	100.896	1.36989	0.434027	3.15623	0.00159824	0.00991125
ENSRNOG00000032942	NEU1	chr20:6690981-6695245	1931	437.826	435.507	1369.53	1033.42	806.199	1.36795	0.3322	4.11787	3.82e-05	0.000430427
ENSRNOG00000009433	CCDC109B	chr2:249516524-250013503	915	47.4365	51.9836	138.464	144.483	93.561	1.36789	0.444261	3.07902	0.0020768	0.0122845
ENSRNOG00000002072	EVA1C	chr11:34614322-34687047	1323	24.3593	31.1902	73.6375	89.3837	53.4881	1.36774	0.534018	2.56122	0.0104305	0.0463516
ENSRNOG00000019403	AFAP1L1	chr18:56282281-56342880	3436	90.3858	129.381	332.313	282.844	205.098	1.36743	0.404085	3.38402	0.00071433	0.00505527
ENSRNOG00000034040	RNF113A1	chrX:124602717-124603842	1125	59.6161	35.8109	115.806	162.85	91.8724	1.36708	0.496555	2.75312	0.00590297	0.0289524
ENSRNOG00000005900	SLC2A6	chr3:10930060-10936876	2126	192.951	130.537	400.286	504.467	301.134	1.36662	0.383768	3.56106	0.000369364	0.0029147
ENSRNOG00000014371	CDH13	chr19:61621376-62720155	3152	325.004	484.025	1220.37	1023.63	750.943	1.36645	0.363073	3.76357	0.000167507	0.00149606
ENSRNOG00000009102	FERMT2	chr15:23771817-23840399	3212	1116.04	1474.02	3782.57	3325.56	2384.91	1.36603	0.32133	4.25119	2.13e-05	0.000262058
ENSRNOG00000031643	DCHS1	chr1:177600833-177620711	10462	307.696	371.972	850.292	1018.73	625.674	1.36342	0.327278	4.16594	3.1e-05	0.000361413
ENSRNOG00000014013	MAP4K4	chr9:46343467-46467917	5254	978.859	1418.57	3513.83	3081.9	2211.77	1.36244	0.340257	4.00416	6.22e-05	0.000650848
ENSRNOG00000007284	SLC2A1	chr5:141964113-141992634	2573	586.546	980.757	2092.69	2259.08	1454.33	1.3621	0.368722	3.69412	0.00022065	0.00188406
ENSRNOG00000025691	PLA2G7	chr9:18813229-18855030	1758	748.727	1078.95	2936.06	2115.82	1693.61	1.36195	0.366167	3.71948	0.000199629	0.00174028
ENSRNOG00000007110	ANKRD6	chr5:52640128-52778272	4582	41.6672	58.9147	147.904	139.585	95.5992	1.3608	0.461208	2.95052	0.00317242	0.0173993
ENSRNOG00000000442	NOTCH4	chr20:6409149-6433141	6483	153.207	311.902	728.822	586.504	438.249	1.36047	0.440802	3.08636	0.00202625	0.0120377
ENSRNOG00000010522	TLR4	chr5:86690665-86704298	3341	73.7189	94.7257	259.934	213.052	157.9	1.35999	0.412946	3.29338	0.00098989	0.00663892
ENSRNOG00000008234	LRRC61	chr4:142850800-142872500	2772	130.13	136.313	275.039	472.632	248.353	1.35967	0.414405	3.28101	0.00103435	0.00687685
ENSRNOG00000005964	NR4A3	chr5:68298771-68339859	5645	45.5134	57.7596	128.394	167.747	98.119	1.35732	0.458073	2.96312	0.00304538	0.0168293
ENSRNOG00000047363	KCNK13	chr6:133202979-133305227	1936	42.3082	53.1388	176.226	99.1792	91.1621	1.35718	0.513046	2.64533	0.00816114	0.0378609
ENSRNOG00000012216	TGFBI	chr17:10576348-10605606	2694	6448.16	9867.64	22015.7	22743.9	15007.5	1.35715	0.339146	4.00168	6.29e-05	0.000657246
ENSRNOG00000002950	LYL1	chr19:36790825-36793693	1459	287.824	184.831	645.114	657.521	436.018	1.35703	0.369118	3.67642	0.000236534	0.00200215
ENSRNOG00000013014	CYBA	chr19:65917256-65978333	698	2683.37	2253.78	5780.85	7660.06	4507.16	1.35617	0.310496	4.36774	1.26e-05	0.000167776
ENSRNOG00000008224	JDP2	chr6:118780171-118989790	810	50.6417	101.657	247.346	192.236	145.686	1.3556	0.487252	2.78213	0.0054004	0.0269872
ENSRNOG00000023303	DPEP2	chr19:48831092-48837523	1630	192.31	189.451	546.931	493.447	349.269	1.35534	0.334714	4.04926	5.14e-05	0.000554538
ENSRNOG00000004666	PRR5L	chr3:97950824-98029048	2319	64.1034	90.1049	217.765	213.052	143.758	1.35466	0.420281	3.22323	0.00126755	0.00815565
ENSRNOG00000020914	SPTBN4	chr1:85379606-85463656	8604	28.8465	30.035	84.3369	86.9348	56.4732	1.35378	0.513556	2.6361	0.00838656	0.038734
ENSRNOG00000005358	PMM1	chr7:123158886-123169142	1196	557.058	544.095	1237.36	1770.53	1007.45	1.35312	0.33119	4.08564	4.4e-05	0.000483239
ENSRNOG00000032042	RGD1560108	chr1:229659746-229721430	4422	455.775	425.11	1069.32	1323.61	803.328	1.35276	0.311583	4.34157	1.41e-05	0.00018666
ENSRNOG00000033217	ESAM	chr8:39998698-40009620	1801	813.472	862.928	2078.84	2454.99	1524.36	1.35173	0.294657	4.58746	4.49e-06	7.05e-05
ENSRNOG00000048580	TRIP6	chr12:24466256-24470664	1728	432.057	399.696	1084.42	1165.66	756.801	1.35129	0.30048	4.49711	6.89e-06	0.000101559
ENSRNOG00000004067	NRCAM	chr6:74371671-74446689	6916	60.8982	76.2426	232.871	153.054	128.774	1.35102	0.45653	2.95933	0.00308309	0.0169862
ENSRNOG00000007457	SERPING1	chr3:78522965-78740155	1791	4402.62	2496.37	8347.47	10619.5	6342.01	1.35047	0.375412	3.59731	0.000321529	0.00260021
ENSRNOG00000004322	SH3KBP1	chrX:38095015-38505128	3287	642.957	477.094	1584.78	1452.18	1021.4	1.35043	0.325404	4.15002	3.32e-05	0.000383129
ENSRNOG00000009370	TBKBP1	chr10:84861027-84874814	3307	181.413	149.02	416.65	484.876	302.341	1.35025	0.350658	3.85061	0.000117825	0.00111359
ENSRNOG00000033653	MPP3	chr10:89722765-89751677	2815	96.1551	130.537	327.907	298.762	209.951	1.34991	0.390552	3.45641	0.000547419	0.0040499
ENSRNOG00000008292	HIF1A	chr6:106242729-106287704	3706	1608.99	3005.81	7864.1	4992.02	4304.48	1.34882	0.425381	3.17085	0.00151991	0.00954335
ENSRNOG00000005413	CREB3L1	chr3:87591104-87632647	2640	964.756	2505.61	4387.41	5468.32	3272.02	1.34763	0.464787	2.89947	0.00373796	0.01996
ENSRNOG00000013963	IL6ST	chr2:63332283-63361404	7457	2494.9	3326.95	8177.53	7575.57	5304.39	1.34761	0.314614	4.28337	1.84e-05	0.000232977
ENSRNOG00000031036	MDFIC	chr4:41790494-41870159	3401	482.698	539.474	1327.36	1431.36	928.384	1.34738	0.300358	4.48591	7.26e-06	0.000106187
ENSRNOG00000007918	TBXAS1	chr4:66481263-66651601	1849	308.337	360.42	1125.96	704.05	615.264	1.34586	0.383386	3.51046	0.000447336	0.00343508
ENSRNOG00000015780	RCN2	chr8:59280469-59297530	1988	557.058	966.895	2318.64	1875.83	1407.25	1.34582	0.388786	3.46161	0.000536956	0.00398058
ENSRNOG00000007398	ZFP691	chr5:142027714-142032377	1459	103.847	85.4841	241.053	279.171	173.99	1.34562	0.388081	3.46738	0.000525567	0.00391208
ENSRNOG00000021255	SMOX	chr3:130580815-130594899	2256	182.695	169.813	482.734	472.632	321.592	1.34384	0.334721	4.01481	5.95e-05	0.000624376
ENSRNOG00000027914	PLSCR3	chr10:56198995-56203509	1746	412.826	444.749	1059.88	1253.82	778.646	1.34343	0.308501	4.3547	1.33e-05	0.00017694
ENSRNOG00000019995	DNAJC18	chr18:28179460-28206342	1125	87.8216	103.967	254.899	271.824	176.593	1.34332	0.383189	3.50564	0.000455509	0.00348498
ENSRNOG00000018666	GPSM1	chr3:9127873-9155506	3407	295.517	206.779	653.926	712.621	459.006	1.34325	0.352243	3.81341	0.000137064	0.0012641
ENSRNOG00000016366	COLEC12	chr18:910944-1096503	2887	915.396	839.824	2590.53	2123.17	1590.85	1.34271	0.307208	4.37069	1.24e-05	0.000166437
ENSRNOG00000010629	NOD1	chr4:149781208-149832175	4110	630.777	749.719	1764.15	1940.73	1249.14	1.33774	0.303454	4.40839	1.04e-05	0.000143525
ENSRNOG00000013017	ARNT2	chr1:147327951-147484879	6192	65.3854	80.8634	236.647	167.747	135.625	1.33698	0.440734	3.03353	0.00241707	0.0139694
ENSRNOG00000029333	ECHDC2	chr5:131619157-131638155	1390	218.593	198.693	484.623	645.277	379.684	1.33409	0.347989	3.83371	0.000126225	0.00117565
ENSRNOG00000011847	GRK4	chr14:81953239-82026972	1997	30.1286	40.4317	93.7776	105.301	66.0465	1.33331	0.502378	2.65401	0.00795426	0.0370546
ENSRNOG00000036833	ZFP385A	chr7:142719644-142739423	2445	347.44	321.143	866.656	915.877	601.959	1.33135	0.306844	4.33886	1.43e-05	0.000188468
ENSRNOG00000013201	TEX264	chr8:114720830-114748300	1458	801.933	742.788	1783.03	2347.24	1392.13	1.3299	0.311367	4.27117	1.94e-05	0.000243344
ENSRNOG00000017803	APBB1IP	chr17:91762063-91812342	2488	475.647	403.162	1293.38	1053.01	793.074	1.32865	0.326024	4.0753	4.6e-05	0.000502193
ENSRNOG00000049152	NME4	chr10:15275266-15279122	873	95.514	86.6393	215.877	282.844	167.281	1.32841	0.396446	3.3508	0.000805775	0.00557877
ENSRNOG00000007568	SPATA6	chr5:135542966-135626738	2380	140.386	152.485	443.083	345.29	265.705	1.32825	0.370359	3.58638	0.000335304	0.00269112
ENSRNOG00000008741	CAMSAP2	chr13:58197542-58276568	7216	362.825	380.058	996.938	979.547	668.384	1.32785	0.304114	4.3663	1.26e-05	0.000168724
ENSRNOG00000010311	DZIP1	chr15:107541021-107591804	3402	249.362	191.762	586.582	593.851	398.365	1.32695	0.340735	3.89436	9.85e-05	0.000955521
ENSRNOG00000001417	PLOD3	chr12:24728206-24744501	2750	1041.68	1256.85	2929.13	3182.3	2065.81	1.3261	0.298876	4.43696	9.12e-06	0.000128908
ENSRNOG00000013248	WWC2	chr16:47091899-47254470	6864	162.823	236.814	582.806	497.12	364.052	1.32403	0.377504	3.50734	0.000452614	0.00347012
ENSRNOG00000020038	CHPF	chr9:82438464-82443159	2917	916.678	933.394	2307.94	2582.33	1655.09	1.32223	0.286284	4.61862	3.86e-06	6.21e-05
ENSRNOG00000000561	PALD1	chr20:32729252-32765198	1735	171.797	187.141	473.294	484.876	323.561	1.32188	0.335423	3.94095	8.12e-05	0.000815136
ENSRNOG00000018520	NSUN6	chr17:83764476-83802110	2036	96.7961	98.1912	236.017	291.415	177.179	1.32121	0.38369	3.44344	0.000574372	0.00419393
ENSRNOG00000003033	PLCD3	chr10:90937142-90957990	2933	94.873	85.4841	213.989	274.273	163.87	1.32101	0.395977	3.33607	0.000849726	0.00583591
ENSRNOG00000025418	ARMC9	chr9:92901737-93029061	4921	246.157	243.745	638.191	661.194	439.471	1.31867	0.31716	4.15774	3.21e-05	0.000372185
ENSRNOG00000018939	REXO2	chr8:51395456-51407172	1183	1594.25	1437.06	3505.02	4509.59	2710.11	1.31777	0.302072	4.36245	1.29e-05	0.000171413
ENSRNOG00000002146	PKD2	chr14:6581341-6624595	4851	326.286	437.817	1131	906.081	689.213	1.31658	0.352253	3.7376	0.000185788	0.00163923
ENSRNOG00000007281	FLNC	chr4:56478246-56505940	9049	733.343	860.617	1952.34	2260.31	1425.7	1.31602	0.303517	4.33589	1.45e-05	0.000190512
ENSRNOG00000016643	LPCAT2	chr19:26567386-26627661	1635	82.6934	107.433	314.69	203.256	174.378	1.31522	0.438915	2.99652	0.00273077	0.0153884
ENSRNOG00000013938	TSHZ3	chr1:93825018-93896294	4881	73.0779	108.588	228.465	266.927	166.244	1.31393	0.420083	3.12779	0.00176125	0.01069
ENSRNOG00000008192	SLC48A1	chr7:139463279-139471081	1550	480.134	642.286	1511.77	1458.3	1005.93	1.31285	0.326847	4.01672	5.9e-05	0.000620693
ENSRNOG00000014064	CTSH	chr8:96939704-96958827	1394	5193.01	5068.98	12362.9	14538.9	9123.72	1.31199	0.279894	4.68744	2.77e-06	4.69e-05
ENSRNOG00000008134	MEFV	chr10:10804439-10813961	3193	127.566	158.261	419.167	345.29	258.299	1.31166	0.374332	3.504	0.000458323	0.0034955
ENSRNOG00000001758	TCTEX1D2	chr11:74678024-74686385	883	107.694	92.4153	232.241	306.109	181.013	1.3111	0.393864	3.32881	0.00087219	0.00597049
ENSRNOG00000012579	TLCD1	chr10:66193480-66195513	1321	46.7955	58.9147	122.1	170.196	97.6172	1.31019	0.464015	2.8236	0.00474875	0.024289
ENSRNOG00000001061	RILPL2	chr12:39415024-39426666	1289	612.828	310.746	1237.36	1245.25	836.171	1.3101	0.404802	3.23641	0.00121045	0.00783675
ENSRNOG00000011154	GPR116	chr9:18970747-19071542	4945	255.772	381.213	941.552	757.925	575.087	1.31	0.373317	3.50908	0.000449658	0.00345109
ENSRNOG00000017204	PQLC1	chr18:72002640-72038286	1855	451.288	436.662	1067.43	1268.51	791.418	1.30992	0.305654	4.28564	1.82e-05	0.000231009
ENSRNOG00000006359	GALK1	chr10:103720845-103725036	1337	674.368	695.425	1633.87	1961.54	1218.83	1.30937	0.298599	4.38504	1.16e-05	0.000156846
ENSRNOG00000009892	ADAMTS15	chr8:32003563-32026941	6064	692.316	621.493	1589.81	1856.24	1168.26	1.3092	0.298635	4.38395	1.17e-05	0.000157488
ENSRNOG00000012482	NDRG4	chr19:9751517-9787015	2659	269.234	291.108	716.864	756.7	499.674	1.30862	0.315269	4.15082	3.31e-05	0.000382102
ENSRNOG00000020792	ETV4	chr10:89481283-89496509	2329	69.8727	94.7257	213.989	231.418	149.85	1.30721	0.411775	3.17457	0.00150059	0.00943827
ENSRNOG00000038960	RGD1309362	chr18:54739046-54741758	2712	492.955	346.557	1213.44	1005.26	751.833	1.30683	0.350185	3.73184	0.000190087	0.00167267
ENSRNOG00000031163	NFKBIZ	chr11:50420562-50447282	2990	1405.15	1562.97	3768.73	3986.76	2634.63	1.30667	0.284797	4.58805	4.47e-06	7.04e-05
ENSRNOG00000009263	IFI27	chr6:136548420-136554959	867	3516.71	2726.25	6662.62	9811.39	5568.83	1.30341	0.338733	3.84789	0.000119137	0.00112328
ENSRNOG00000022274	SLC2A8	chr3:17356861-17366510	2087	217.31	180.21	457.559	590.177	354.497	1.30039	0.352626	3.68773	0.000226265	0.00192636
ENSRNOG00000005874	TLE2	chr7:11155630-11170879	2410	97.4371	54.294	184.408	226.52	137.823	1.30038	0.461087	2.82024	0.00479882	0.0244935
ENSRNOG00000008259	CLEC1A	chr4:211835488-211858230	3299	38.462	54.294	157.345	97.9547	85.4798	1.29936	0.5123	2.53633	0.0112023	0.0490187
ENSRNOG00000007455	TMEM132E	chr10:69370777-69428366	4196	64.7444	62.3803	140.981	203.256	115.481	1.29934	0.44108	2.94581	0.00322109	0.0176
ENSRNOG00000004168	SLC35E4	chr14:84847696-84854560	2085	200.644	190.607	439.937	592.626	349.564	1.29699	0.352241	3.68212	0.000231306	0.00196354
ENSRNOG00000011913	CP	chr2:124467579-124510450	3700	690.393	773.978	2278.36	1557.48	1304.82	1.29584	0.348597	3.71731	0.000201351	0.00175024
ENSRNOG00000015349	SIX5	chr1:81267939-81271004	2160	119.873	161.727	443.713	307.333	254.377	1.29507	0.409862	3.15977	0.00157895	0.00982511
ENSRNOG00000022218	IFI44	chr2:275575814-275593538	1667	254.49	206.779	506.021	708.947	410.984	1.29476	0.360617	3.5904	0.00033017	0.00265678
ENSRNOG00000008052	ATP13A2	chr5:163224536-163243882	3789	941.679	1003.86	2465.91	2570.09	1715.47	1.29331	0.285023	4.53757	5.69e-06	8.65e-05
ENSRNOG00000021907	PARVG	chr7:63279791-63298465	2536	319.235	254.142	835.187	662.419	509.14	1.29249	0.348358	3.71024	0.000207067	0.00178905
ENSRNOG00000024425	LOC100910636	chr12:23711088-23732886	1863	70.5137	146.709	338.606	254.682	199.928	1.29228	0.477665	2.70541	0.00682197	0.0325076
ENSRNOG00000046109	LOC689574	chr4:62503530-62513357	759	499.365	553.337	1158.69	1586.87	931.817	1.29041	0.328201	3.93176	8.43e-05	0.000841361
ENSRNOG00000014566	FKBP11	chrX:114723349-114993826	717	678.214	701.201	1441.91	2166.02	1222.84	1.28989	0.338643	3.809	0.000139529	0.00128235
ENSRNOG00000037198	USP18	chr4:220895596-220922138	1606	132.694	118.985	281.962	383.248	224.922	1.2896	0.37976	3.39583	0.000684208	0.00487139
ENSRNOG00000003205	LDB2	chr14:70817549-71145367	2376	157.694	189.451	450.636	454.265	307.696	1.28624	0.346611	3.7109	0.000206527	0.00178651
ENSRNOG00000013190	RNASET2	chr1:54425132-54442302	963	3498.76	3090.14	7946.55	8999.59	5779.24	1.28542	0.282723	4.54656	5.45e-06	8.35e-05
ENSRNOG00000003144	GPRC5C	chr10:103052021-103073771	4019	167.31	165.192	405.95	457.938	293.698	1.28496	0.340573	3.77295	0.000161328	0.00145245
ENSRNOG00000033110	SVEP1	chr5:79301112-79470394	10578	371.159	457.456	1377.71	799.556	740.86	1.28481	0.398649	3.22291	0.00126894	0.00815987
ENSRNOG00000003748	RGD1565785	chrX:54590576-54609310	1558	68.5906	56.6044	176.856	157.952	113.311	1.28469	0.428869	2.99554	0.00273958	0.0154202
ENSRNOG00000001325	IL3RA	chr12:20519720-20525025	1403	484.622	386.989	890.573	1390.96	773.003	1.28268	0.364631	3.51774	0.000435238	0.00334924
ENSRNOG00000007177	KDELC2	chr8:56547249-56564862	3747	1011.55	1351.57	3343.27	2759.87	2083.44	1.27815	0.33168	3.85355	0.000116416	0.0011019
ENSRNOG00000019859	PLA2G15	chr19:48996418-49013714	2645	635.264	526.767	1543.24	1437.49	1018.06	1.27733	0.306811	4.16324	3.14e-05	0.000364487
ENSRNOG00000008587	TEK	chr5:117672483-117799345	4559	302.568	405.472	925.189	904.857	623.952	1.27671	0.336307	3.79628	0.000146887	0.00134319
ENSRNOG00000005620	LCP2	chr10:18875178-18921942	3382	689.752	643.441	1922.13	1499.93	1169.96	1.27637	0.319456	3.99546	6.46e-05	0.00067185
ENSRNOG00000016066	BAMBI	chr17:54939071-54943877	1391	92.9499	118.985	251.752	302.435	188.093	1.27134	0.391596	3.24656	0.0011681	0.00761436
ENSRNOG00000016456	IL33	chr1:255386569-255397660	2350	1533.99	2214.5	5307.56	4343.07	3297.51	1.27035	0.344282	3.68987	0.000224368	0.00191245
ENSRNOG00000017874	CD53	chr2:228956410-229004207	1687	1296.17	991.154	3725.93	2195.41	2021.91	1.27028	0.385833	3.29232	0.000993649	0.006658
ENSRNOG00000001821	ADIPOQ	chr11:84363939-84382663	1487	446.16	205.624	568.33	1192.6	590.087	1.27024	0.493032	2.57637	0.00998423	0.0447509
ENSRNOG00000018659	CSF1	chr2:229989434-230017945	3953	515.391	584.527	1564.64	1251.37	963.63	1.26984	0.324152	3.91742	8.95e-05	0.000885502
ENSRNOG00000040205	ZCCHC24	chr16:1973078-2024105	4423	737.83	894.118	1981.29	2186.84	1424.94	1.26843	0.304479	4.1659	3.1e-05	0.000361413
ENSRNOG00000008365	HOXB2	chr10:84003532-84005341	1068	46.7955	55.4492	137.205	133.463	91.4313	1.26729	0.44956	2.81896	0.00481801	0.0245656
ENSRNOG00000018414	CSF1R	chr18:55662899-55689297	3566	2832.09	2557.59	7796.76	5920.14	4701.96	1.26617	0.314327	4.0282	5.62e-05	0.000596765
ENSRNOG00000033883	STARD8	chrX:69587702-69659522	4777	132.694	108.588	316.578	307.333	212.8	1.26515	0.36929	3.42591	0.000612743	0.0044363
ENSRNOG00000011054	LAPTM5	chr5:152749593-152771632	2072	3675.05	2653.47	8490.96	7586.59	5507.8	1.26219	0.31877	3.95957	7.51e-05	0.000765391
ENSRNOG00000016378	MAP3K8	chr17:54146363-54166886	2721	121.796	114.364	351.823	258.356	208.217	1.26206	0.392979	3.21153	0.00132029	0.0084206
ENSRNOG00000006440	IFT27	chr7:119384970-119401297	1021	246.798	205.624	477.699	689.356	397.261	1.26157	0.36459	3.46025	0.000539679	0.00399873
ENSRNOG00000028753	B9D2	chr1:83735613-83741208	1037	142.951	78.553	237.906	347.739	198.009	1.26132	0.453696	2.7801	0.00543415	0.0271186
ENSRNOG00000045825	PPP1R3D	chr3:183137514-183140586	3072	183.977	250.676	490.287	631.808	382.236	1.26043	0.368833	3.41736	0.000632324	0.00455993
ENSRNOG00000021919	RHOJ	chr6:107702936-107785229	1830	332.056	510.594	1467.08	742.007	752.892	1.25942	0.447555	2.814	0.00489289	0.0248691
ENSRNOG00000007567	REM1	chr3:154514769-154521666	894	53.8468	70.4667	172.45	153.054	110.427	1.25877	0.439593	2.86348	0.0041902	0.0219296
ENSRNOG00000046905	SGCE	chr4:29634750-29678921	1486	252.567	257.608	686.654	610.993	444.868	1.25821	0.324967	3.87182	0.000108027	0.00103122
ENSRNOG00000015636	WDR34	chr3:13950971-13966415	1657	151.925	106.278	278.186	390.595	227.296	1.25637	0.406677	3.08936	0.00200587	0.0119312
ENSRNOG00000003772	CSRP2	chr7:53641860-53660495	841	1182.71	1709.68	3146.27	4267.15	2529.69	1.25608	0.351718	3.57128	0.000355241	0.00282621
ENSRNOG00000021129	RGD1308428	chr1:91240936-91318683	4923	407.697	547.561	1433.1	1012.61	837.836	1.25573	0.367629	3.41576	0.000636054	0.00458162
ENSRNOG00000012709	BAG2	chr9:38145392-38147902	1419	207.695	373.127	669.66	836.289	512.569	1.25223	0.407016	3.07662	0.0020936	0.0123672
ENSRNOG00000033348	DUOX1	chr3:120792927-120826088	5215	85.2575	93.5705	232.871	226.52	157.071	1.25221	0.38861	3.22227	0.00127181	0.00816861
ENSRNOG00000001302	ADORA2A	chr20:16449384-16466147	2485	145.515	147.864	356.858	390.595	255.963	1.25155	0.347676	3.59977	0.000318502	0.00258004
ENSRNOG00000014936	IFITM2	chr1:220671381-220672562	630	4098.13	3902.24	8848.45	11236.6	6893.73	1.24743	0.292583	4.26352	2.01e-05	0.000250243
ENSRNOG00000009204	IL17RE	chr4:208711256-208723904	2610	290.388	335.005	746.445	831.391	540.972	1.24738	0.320205	3.89556	9.8e-05	0.000952353
ENSRNOG00000048723	PROS1	chr7:1199863-1279990	3242	937.832	1045.45	2543.32	2424.38	1708.83	1.24652	0.291636	4.27424	1.92e-05	0.000240841
ENSRNOG00000019662	TM6SF1	chr1:144605596-144694902	2672	332.697	353.488	976.798	753.027	594.634	1.24584	0.337112	3.69562	0.00021935	0.00187626
ENSRNOG00000046561	LOC102552895	chr5:131467883-131477254	1831	164.105	185.986	630.639	281.62	311.65	1.24499	0.471075	2.64286	0.00822085	0.038081
ENSRNOG00000021156	VEGFB	chr1:229229800-229233423	1786	358.979	286.487	662.108	975.874	559.802	1.24286	0.361505	3.43801	0.000586003	0.00426602
ENSRNOG00000011573	CSAD	chr7:141579061-141607052	2389	305.773	252.987	565.183	857.104	485.695	1.24273	0.367516	3.38144	0.000721059	0.00508898
ENSRNOG00000039390	SLC37A2	chr8:39709231-39735147	1521	575.648	682.718	1604.92	1547.68	1084.81	1.24229	0.305351	4.0684	4.73e-05	0.00051574
ENSRNOG00000010526	DENND1A	chr3:27296834-27729383	4108	255.772	254.142	653.296	625.686	439.796	1.24153	0.318852	3.89374	9.87e-05	0.000957353
ENSRNOG00000030418	TMEM47	chrX:48984316-49010851	4130	492.314	485.18	1234.84	1203.62	839.71	1.24101	0.29649	4.18567	2.84e-05	0.000335908
ENSRNOG00000007091	LY6E	chr7:116253323-116257488	1263	3218.63	2231.83	5553.02	8239.22	4717.71	1.23995	0.356804	3.47516	0.000510558	0.00382184
ENSRNOG00000004210	OSR1	chr6:45083959-45086318	1688	233.977	94.7257	399.656	459.163	291.433	1.23931	0.477318	2.5964	0.00942076	0.0426319
ENSRNOG00000004052	PPP1R9B	chr10:82616847-82632352	3986	1031.42	1158.66	3124.24	2355.81	1888.19	1.23859	0.324658	3.81505	0.000136157	0.0012577
ENSRNOG00000003207	FMNL1	chr10:91025569-91052384	3653	636.547	495.577	1604.29	1234.23	977.063	1.23711	0.340395	3.63434	0.000278689	0.00230271
ENSRNOG00000019542	MGC108823	chr18:54811545-54820264	1594	142.951	85.4841	224.689	367.33	200.874	1.23704	0.455593	2.71524	0.00662284	0.031777
ENSRNOG00000003778	OPN3	chr13:98180839-98211263	1751	69.8727	63.5355	193.22	150.605	117.607	1.23681	0.431943	2.86337	0.00419161	0.0219296
ENSRNOG00000000168	GATM	chr3:121249707-121266292	2264	212.823	302.66	782.949	528.956	450.343	1.23666	0.397655	3.10988	0.00187163	0.0112708
ENSRNOG00000018242	CAMKK1	chr10:59269278-59450774	3411	210.259	165.192	426.09	519.16	323.999	1.23591	0.355956	3.47209	0.000516422	0.00385781
ENSRNOG00000026857	KIF7	chr1:142395562-142412012	4026	61.5392	76.2426	220.912	137.137	122.213	1.23563	0.468179	2.63923	0.00830942	0.0384264
ENSRNOG00000002122	LRRC8C	chr14:5278308-5369415	2854	202.567	209.09	618.68	419.981	357.346	1.23403	0.377901	3.26549	0.00109275	0.00720273
ENSRNOG00000013777	RNF166	chr19:65999962-66009803	1755	542.956	507.129	1188.9	1426.47	899.902	1.23379	0.304447	4.05255	5.07e-05	0.000548696
ENSRNOG00000009313	LRPAP1	chr14:81600001-81613373	2776	706.419	792.461	1848.49	1869.71	1282.16	1.23247	0.293912	4.19333	2.75e-05	0.000326537
ENSRNOG00000007650	CD63	chr7:3304374-3305798	746	8209.72	8006.63	18002.8	22211.2	13855.1	1.2319	0.285861	4.30945	1.64e-05	0.00021111
ENSRNOG00000010260	DIXDC1	chr8:53688640-53740876	5393	113.463	112.054	292.032	274.273	194.472	1.23071	0.368704	3.33792	0.000844075	0.00579983
ENSRNOG00000008936	MAP3K6	chr5:155101636-155113501	4339	130.771	150.175	347.418	357.535	242.337	1.22952	0.356193	3.45183	0.000556798	0.00410677
ENSRNOG00000015310	LRRC32	chr1:169649229-169661088	3953	357.697	469.008	1002.6	1060.36	710.342	1.22889	0.328839	3.73705	0.000186188	0.00164177
ENSRNOG00000012062	NPC2	chr6:117060859-117081692	1168	3675.05	4045.48	9462.73	9593.44	6581.93	1.22861	0.27842	4.4128	1.02e-05	0.000141434
ENSRNOG00000007346	GRASP	chr7:140670665-140678432	1466	53.2058	65.8459	161.751	143.259	104.292	1.22767	0.442454	2.77469	0.00552546	0.027452
ENSRNOG00000018109	CLIC4	chr5:157335184-157394574	3986	1953.23	2566.83	5581.34	5631.17	3867.91	1.22685	0.309278	3.96682	7.28e-05	0.00074722
ENSRNOG00000021891	ZDHHC8	chr11:89997059-90009653	3368	160.899	168.658	454.412	371.004	284.198	1.22683	0.35769	3.42988	0.000603845	0.00438247
ENSRNOG00000017315	HAUS7	chr1:153101833-153120880	1238	452.57	359.264	782.319	1262.39	700.022	1.22579	0.373763	3.27958	0.00103961	0.00690246
ENSRNOG00000006938	MAPK8IP1	chr3:87997742-88016197	2774	219.875	247.211	533.714	629.359	400.351	1.225	0.333249	3.67595	0.000236967	0.00200459
ENSRNOG00000049560	GLUL	chr13:76294458-76303626	2475	3514.79	4553.76	12185.4	7957.6	6951.44	1.2247	0.361719	3.38579	0.000709739	0.00503103
ENSRNOG00000000903	ASL	chr12:32102490-32115103	1763	304.491	250.676	695.465	680.785	474.583	1.22446	0.325337	3.76365	0.000167449	0.00149606
ENSRNOG00000017208	CSPG4	chr8:60101159-60136205	8077	314.748	366.196	816.935	870.573	582.202	1.22399	0.31655	3.86666	0.000110335	0.00105187
ENSRNOG00000022681	RGD1561113	chr3:16741660-16759602	520	250.644	333.85	507.28	989.343	509.836	1.22339	0.426487	2.86853	0.00412378	0.0216873
ENSRNOG00000014900	CREM	chr17:55055678-55121385	2175	319.876	350.023	796.795	860.777	572.053	1.2232	0.311632	3.92515	8.67e-05	0.00085951
ENSRNOG00000048915	TWF2	chr8:114259814-114272429	1582	567.315	399.696	1168.13	1230.56	826.8	1.22288	0.334311	3.65791	0.000254285	0.00213128
ENSRNOG00000047578	CCDC28B	chr5:151552469-151556886	1176	235.9	132.847	362.523	579.157	321.205	1.22173	0.439619	2.77906	0.00545163	0.0271779
ENSRNOG00000002045	ANXA3	chr14:14305732-14351478	747	639.752	732.391	1639.53	1735.02	1166.7	1.2184	0.297873	4.09035	4.31e-05	0.000474259
ENSRNOG00000022910	EMCN	chr2:261184359-261264293	1390	444.236	504.819	1128.48	1208.52	807.554	1.21797	0.305137	3.99155	6.56e-05	0.000682026
ENSRNOG00000005151	DYNC2LI1	chr6:7837942-7869291	1356	107.694	79.7082	212.101	260.804	162.227	1.21599	0.40732	2.98534	0.00283264	0.0158643
ENSRNOG00000018533	IFFO1	chr4:224676330-224693515	2372	376.287	242.59	665.255	880.368	530.851	1.21593	0.377104	3.22438	0.00126246	0.0081273
ENSRNOG00000012956	TGM2	chr3:160977904-161007258	3506	3369.91	2964.22	6960.31	8540.43	5360.7	1.21225	0.292738	4.14107	3.46e-05	0.000394024
ENSRNOG00000000441	GPSM3	chr20:6434601-6436463	1228	710.906	374.282	1078.76	1652.99	935.396	1.21109	0.422002	2.86986	0.0041066	0.0216116
ENSRNOG00000003870	C1QTNF2	chr10:28909017-28925541	1216	249.362	157.106	399.027	622.013	349.74	1.21068	0.415874	2.91117	0.00360084	0.019327
ENSRNOG00000038881	HCLS1	chr11:69828260-69850286	1950	1943.61	1098.59	3533.97	4002.68	2597.22	1.20952	0.371454	3.25616	0.00112929	0.00740703
ENSRNOG00000019604	PLD2	chr10:56909459-56926683	4218	455.775	560.268	1200.23	1290.55	861.948	1.20903	0.314023	3.85014	0.00011805	0.00111385
ENSRNOG00000032922	DCLK1	chr2:164277277-164355201	6903	455.775	593.768	1303.45	1272.19	891.46	1.20743	0.323666	3.7305	0.000191101	0.00167697
ENSRNOG00000023991	RAB20	chr16:82824910-82848168	1478	217.31	180.21	456.93	519.16	337.203	1.20638	0.342049	3.52692	0.000420419	0.00325585
ENSRNOG00000019381	ERI3	chr5:140195743-140322806	955	514.75	532.543	1160.58	1398.3	885.857	1.20542	0.305116	3.9507	7.79e-05	0.000787158
ENSRNOG00000006197	CALU	chr4:56392771-56420272	3166	2898.75	5102.48	11598.2	8301.66	6874.08	1.20501	0.39741	3.03216	0.00242808	0.0140189
ENSRNOG00000031934	ENAH	chr13:105280249-105385633	1974	171.797	266.849	509.798	580.382	375.756	1.20416	0.382046	3.15187	0.00162228	0.0100184
ENSRNOG00000008738	TP53I11	chr3:88784313-88799475	2662	757.061	843.29	1828.35	2068.07	1350.36	1.20408	0.295943	4.06862	4.73e-05	0.000515651
ENSRNOG00000001258	SNX8	chr12:18334034-18382248	2617	345.517	310.746	883.02	722.416	556.558	1.20396	0.330042	3.64791	0.000264382	0.00220576
ENSRNOG00000006082	RMDN2	chr6:2200624-2264456	1924	83.9754	94.7257	199.513	246.111	153.475	1.20384	0.399021	3.01698	0.00255309	0.0146075
ENSRNOG00000026647	CXCL16	chr10:56817243-56828333	1705	1052.58	1595.32	3289.77	3210.47	2250.05	1.20228	0.34338	3.50131	0.000462976	0.00352729
ENSRNOG00000017243	BNIP3	chr1:218174696-218191883	1618	436.544	658.459	1329.25	1361.57	930.956	1.20121	0.350827	3.42394	0.000617205	0.00446638
ENSRNOG00000030118	MSN	chrX:66068393-66137456	3612	2921.19	3300.38	8828.31	6332.77	5265.94	1.20104	0.329144	3.64899	0.000263269	0.00219773
ENSRNOG00000005041	CRIP2	chr6:146947873-146952833	1168	1065.4	793.616	2005.83	2533.35	1570.33	1.2006	0.327392	3.66716	0.000245264	0.00206757
ENSRNOG00000028713	ACVRL1	chr7:140571222-140588082	3918	846.806	743.943	1860.45	1995.83	1338.36	1.20026	0.292095	4.10915	3.97e-05	0.000444139
ENSRNOG00000016013	GPRC5B	chr1:195631488-195656026	2549	122.437	115.519	297.067	287.742	202.323	1.20015	0.36421	3.29522	0.000983442	0.00661062
ENSRNOG00000017703	UNC93B1	chr1:226043712-226054651	2271	1910.28	1641.53	4418.88	4167.97	2984.58	1.19904	0.28849	4.15627	3.23e-05	0.000373982
ENSRNOG00000026124	ID3	chr5:158263300-158264888	960	2025.03	1952.27	4515.17	5098.54	3338.91	1.19851	0.279938	4.28134	1.86e-05	0.000234902
ENSRNOG00000010524	CRYAB	chr8:53775524-53779781	1248	364.748	377.747	752.109	1067.71	628.914	1.19851	0.340344	3.52146	0.000429184	0.00330965
ENSRNOG00000002997	SLC9A3R2	chr10:13820309-13830824	2110	817.959	876.79	1669.12	2479.48	1433.51	1.19793	0.33548	3.57081	0.000355882	0.00282977
ENSRNOG00000008170	JPH2	chr3:165905615-165968629	4169	501.288	569.509	1233.58	1366.47	902.1	1.19792	0.304061	3.93973	8.16e-05	0.00081726
ENSRNOG00000016588	MYADM	chr1:63430412-63438759	2850	1538.48	1929.17	4610.84	3803.09	2924.39	1.19604	0.318997	3.74937	0.000177277	0.00157367
ENSRNOG00000010319	LCP1	chr15:60932333-60988849	3407	5360.97	3411.28	11680	9673.03	7408.92	1.19458	0.351224	3.4012	0.00067091	0.00478606
ENSRNOG00000025371	SPRY1	chr2:144010430-144015083	2489	286.542	366.196	827.005	761.598	551.531	1.19414	0.334962	3.56502	0.000363832	0.00287972
ENSRNOG00000013176	FAR1	chr1:185319726-185379623	1716	254.49	246.056	645.114	568.137	421.37	1.19379	0.32778	3.64204	0.000270489	0.00224641
ENSRNOG00000011781	OPLAH	chr7:117337459-117354917	4003	444.877	422.8	1161.84	939.141	730.643	1.19321	0.321981	3.70584	0.000210688	0.00181282
ENSRNOG00000014746	DZIP1L	chr8:107305973-107339593	3580	114.745	180.21	380.145	347.739	251.701	1.19101	0.401697	2.96496	0.00302725	0.0167673
ENSRNOG00000024085	TMEM237	chr9:65691942-65724365	1891	155.13	166.348	360.635	419.981	270.71	1.18833	0.349272	3.40232	0.000668172	0.00477121
ENSRNOG00000022307	ACAP3	chr5:176815677-176830373	4440	283.337	227.573	623.716	612.217	429.41	1.18829	0.332099	3.57814	0.000346053	0.0027652
ENSRNOG00000017536	CDC16	chr16:80981549-81004585	2135	736.548	782.064	1851.01	1797.47	1270.57	1.18784	0.290533	4.08849	4.34e-05	0.000477699
ENSRNOG00000010662	MMRN2	chr16:9055401-9075350	3896	280.132	412.403	867.286	817.922	584.761	1.18736	0.357574	3.3206	0.000898246	0.00611723
ENSRNOG00000045924	RT1-T24-3	chr20:5324556-5331860	1458	435.262	330.385	681.618	1202.39	649.066	1.18718	0.396867	2.99138	0.00277715	0.0155955
ENSRNOG00000019965	TGFB1I1	chr1:206710119-206716908	1963	1112.19	1209.49	2491.72	3091.7	1941.42	1.18543	0.299821	3.95379	7.69e-05	0.000778683
ENSRNOG00000033051	SLC22A15	chr2:223715477-223775516	3383	148.079	207.934	376.999	495.896	301.795	1.18505	0.385405	3.07482	0.00210627	0.0124118
ENSRNOG00000008771	NLRX1	chr8:47202128-47218106	3522	199.362	204.469	499.098	473.856	338.373	1.18485	0.332164	3.56705	0.000361021	0.00286594
ENSRNOG00000012641	SFR1	chr1:274916099-274942306	1275	1368.61	1139.02	2722.7	3299.85	2094.78	1.18378	0.303011	3.90671	9.36e-05	0.000917654
ENSRNOG00000019028	ZNRF2	chr19:54557435-54656104	789	166.028	210.245	476.441	435.899	316.861	1.18362	0.355782	3.32681	0.000878465	0.00600779
ENSRNOG00000019943	SLC7A6	chr19:49029314-49045949	3652	376.287	340.781	926.447	793.433	599.298	1.17994	0.320507	3.68148	0.00023188	0.00196726
ENSRNOG00000011796	C1R	chr4:224144563-224154807	2095	2354.52	2340.42	6232.75	4973.65	3914.1	1.17868	0.302807	3.89253	9.92e-05	0.000961488
ENSRNOG00000030633	LMF2	chr7:130007320-130011771	2714	898.088	738.167	1748.42	2170.92	1363.86	1.17763	0.312581	3.76745	0.000164922	0.00147778
ENSRNOG00000016541	ENC1	chr2:47160035-47171848	4509	355.774	482.87	1122.18	898.735	704.159	1.17581	0.35317	3.32931	0.000870605	0.00596244
ENSRNOG00000001470	LIMK1	chr12:27037224-27070940	3258	266.029	240.28	639.45	571.811	422.317	1.17494	0.328306	3.5788	0.000345174	0.00275969
ENSRNOG00000010479	MYCBP2	chr15:97165490-97355788	14485	858.985	708.132	1864.22	1866.04	1302.01	1.17419	0.299743	3.91731	8.95e-05	0.000885502
ENSRNOG00000006694	CAV1	chr4:45203433-45236460	2507	2253.87	2779.39	6324.64	5670.35	4189.85	1.17384	0.304009	3.8612	0.00011283	0.00107214
ENSRNOG00000009932	MCTP2	chr1:134364002-134540811	2619	99.3602	155.951	337.977	285.293	216.133	1.17268	0.416444	2.81595	0.00486334	0.0247534
ENSRNOG00000020811	IL6R	chr2:208629065-208677779	4529	558.34	519.836	1474.01	1092.2	897.214	1.16762	0.33394	3.49649	0.00047142	0.00358412
ENSRNOG00000028733	PRKAR1B	chr12:19611757-19708677	2258	68.5906	54.294	141.61	159.176	104.136	1.16698	0.438226	2.66297	0.00774545	0.0362434
ENSRNOG00000036798	DUSP3	chr10:89697009-89708826	4225	717.317	891.808	2063.11	1763.19	1337.68	1.16698	0.320151	3.64508	0.000267312	0.00222638
ENSRNOG00000021221	PCED1A	chr3:129442746-129446650	1105	358.338	251.832	669.031	789.76	508.025	1.16582	0.352019	3.31181	0.000926943	0.00629042
ENSRNOG00000018836	RGD1559896	chr19:68101909-68127030	2991	1379.5	1641.53	3597.54	3552.08	2501.65	1.16515	0.29457	3.95543	7.64e-05	0.000774455
ENSRNOG00000019009	ARRDC2	chr16:20209577-20213710	2318	199.362	161.727	399.027	464.061	300.617	1.16469	0.351434	3.3141	0.000919384	0.0062495
ENSRNOG00000010275	SLC17A9	chr3:179929442-179946156	2276	209.618	185.986	512.945	431.001	329.697	1.1646	0.347924	3.34728	0.000816074	0.00563234
ENSRNOG00000011153	IL17RA	chr4:220083471-220106001	3845	1415.4	1483.27	3430.75	3397.8	2391.88	1.16332	0.280847	4.14217	3.44e-05	0.000393058
ENSRNOG00000005705	QPCT	chr6:1647588-1679763	1405	111.54	146.709	296.438	326.924	216.791	1.16253	0.37984	3.06059	0.00220902	0.0129267
ENSRNOG00000048955	LOC689064	chr1:175127945-175129363	664	7754.59	10387.5	16549.5	27074.7	15152.5	1.16223	0.366169	3.17403	0.00150339	0.0094518
ENSRNOG00000015583	DNAL4	chr7:120978396-120991231	1495	141.027	219.486	444.972	421.205	301.643	1.15981	0.390281	2.97172	0.00296133	0.0164773
ENSRNOG00000001235	GNA12	chr12:17890087-17970852	3345	1671.18	1832.13	4198.59	4027.16	2884.86	1.15769	0.284512	4.06904	4.72e-05	0.00051511
ENSRNOG00000018906	GHDC	chr10:88467003-88471225	2160	165.387	191.762	378.257	472.632	296.706	1.15665	0.356812	3.24162	0.00118853	0.00772574
ENSRNOG00000047374	GNAS	chr3:178489203-178490283	720	7665.48	6886.09	13214.5	21389.6	12054.3	1.15578	0.344203	3.35785	0.000785522	0.00546191
ENSRNOG00000008191	HOXB4	chr10:83970062-83972639	1763	65.3854	110.898	196.367	233.867	148.92	1.15572	0.45025	2.56684	0.0102631	0.0457295
ENSRNOG00000045535	FAM127B	chrX:74428094-74429331	337	792.959	562.578	1388.41	1825.63	1121.58	1.15419	0.345117	3.34434	0.000824798	0.00567809
ENSRNOG00000021102	SCN1B	chr1:90705284-90715018	1415	235.9	176.744	428.608	553.444	342.414	1.15245	0.36531	3.15472	0.00160652	0.00994993
ENSRNOG00000023370	BST2	chr16:19800347-19803919	793	1117.32	976.137	2443.25	2452.54	1718.18	1.15206	0.288669	3.99094	6.58e-05	0.00068331
ENSRNOG00000003387	FDXR	chr10:104468582-104477286	1800	372.441	361.575	735.745	999.138	606.085	1.15206	0.332305	3.46686	0.000526568	0.00391752
ENSRNOG00000020653	S1PR2	chr8:22041266-22052351	2741	457.057	361.575	903.16	1022.4	674.076	1.14988	0.32175	3.57383	0.000351799	0.00280649
ENSRNOG00000042320	SLC41A1	chr13:53681647-53701895	4650	285.901	274.935	721.269	596.299	462.193	1.14755	0.332206	3.45433	0.000551662	0.00407715
ENSRNOG00000019832	BBS1	chr1:227078589-227096525	3750	81.4113	75.0874	191.332	181.216	129.837	1.14521	0.405014	2.8276	0.0046899	0.024064
ENSRNOG00000011864	GM2A	chr10:40277004-40289541	2006	4071.85	3761.3	10056.2	8158.41	6411.06	1.14312	0.299249	3.81995	0.00013348	0.00123611
ENSRNOG00000016538	ITGA8	chr17:80956112-81304978	5857	221.798	410.093	882.391	630.584	528.622	1.14138	0.428493	2.66372	0.0077282	0.036175
ENSRNOG00000029178	ABCC5	chr11:87394893-87645690	5742	600.649	670.011	1729.54	1242.8	1045.43	1.1408	0.340854	3.34689	0.000817241	0.00563234
ENSRNOG00000009766	GPR180	chr15:106783001-106806561	1808	283.337	328.074	661.478	768.945	501.55	1.14058	0.32607	3.49795	0.000468849	0.0035683
ENSRNOG00000005442	TSPAN9	chr4:231011141-231085237	4202	717.317	790.151	1754.71	1744.82	1231.38	1.13985	0.293034	3.88982	0.000100319	0.000969914
ENSRNOG00000037239	FLNA	chr1:152204098-152227391	8412	10418.7	10658.9	22876.1	25962.9	17182	1.13951	0.275455	4.13684	3.52e-05	0.000400416
ENSRNOG00000019308	ARRB2	chr10:56797479-56805282	1642	587.828	526.767	1433.73	1159.54	912.89	1.139	0.319272	3.5675	0.000360407	0.00286263
ENSRNOG00000000394	SRGN	chr20:33908573-33921685	1286	1939.13	2145.19	4231.95	5269.96	3337.38	1.13894	0.29757	3.82749	0.000129458	0.00120039
ENSRNOG00000017707	ABI2	chr9:67013844-67098832	3679	150.002	185.986	422.943	364.881	276.651	1.13495	0.365275	3.1071	0.00188932	0.0113585
ENSRNOG00000002135	SGCB	chr14:36936115-36951529	3695	389.749	410.093	907.566	945.263	652.281	1.13334	0.303733	3.73136	0.000190446	0.00167324
ENSRNOG00000031230	LOC100134871	chr1:175098755-175100086	577	1068.6	1356.19	2319.89	3353.73	1988.26	1.13304	0.342447	3.30866	0.000937434	0.00634259
ENSRNOG00000011728	FTO	chr19:27840261-28182203	3379	460.262	638.821	1333.03	1228.11	900.692	1.13263	0.338381	3.34719	0.00081634	0.00563234
ENSRNOG00000012874	RGMA	chr1:135725457-135768411	3242	326.286	345.402	743.927	811.8	547.41	1.13262	0.311175	3.63983	0.000272822	0.00226192
ENSRNOG00000022764	EVI2A	chr10:64719520-64958999	1464	339.748	224.107	731.969	585.28	462.819	1.12904	0.377888	2.98776	0.00281027	0.0157572
ENSRNOG00000006946	ARHGAP9	chr7:70787048-70804243	1792	967.961	584.527	1626.95	2000.73	1271.85	1.12899	0.367721	3.07023	0.00213892	0.0125737
ENSRNOG00000009347	ARHGAP25	chr4:183812924-183891522	3412	558.981	467.852	1264.42	1104.44	835.256	1.12695	0.315953	3.56683	0.00036133	0.00286683
ENSRNOG00000049402	NBL1	chr5:161263766-161274897	1774	1621.82	1117.07	2549.62	3836.15	2238.13	1.12481	0.363751	3.09226	0.0019864	0.0118347
ENSRNOG00000019179	GGTA1	chr3:19925447-19957495	3010	617.957	486.335	1350.65	1190.15	896.666	1.12323	0.321761	3.4909	0.000481405	0.00363914
ENSRNOG00000008425	LOC685707	chr13:57316373-57463247	6284	694.881	816.72	1630.72	1842.77	1225.6	1.12062	0.303675	3.69018	0.000224093	0.00191122
ENSRNOG00000014753	TCF7L1	chr4:165263182-165426980	2736	158.335	145.554	356.858	345.29	247.401	1.11828	0.350289	3.19246	0.00141069	0.00892036
ENSRNOG00000021100	TNFAIP8L2	chr2:215799037-215820349	1385	1484.63	904.515	2635.84	2883.54	1943.08	1.11801	0.355522	3.14471	0.00166252	0.0102099
ENSRNOG00000042451	DDX59	chr13:58350166-58375119	2148	130.13	175.589	354.97	356.31	250.163	1.11747	0.374375	2.98488	0.00283687	0.0158758
ENSRNOG00000008487	AMOTL2	chr8:110604449-110619840	4141	371.8	658.459	1384.64	1023.63	847.463	1.11709	0.407932	2.73842	0.00617343	0.0300061
ENSRNOG00000022552	SH2D3C	chr3:17095295-17130517	3078	484.622	354.644	917.007	1013.83	680.82	1.11664	0.333058	3.35269	0.000800312	0.00554621
ENSRNOG00000016595	HHEX	chr1:263583987-263589575	1602	174.361	146.709	410.985	330.597	261.632	1.11644	0.368917	3.02628	0.00247585	0.0142608
ENSRNOG00000048838	GJC1	chr10:90573582-90576548	1569	233.336	235.659	590.988	487.325	380.808	1.11569	0.340573	3.2759	0.00105324	0.00698661
ENSRNOG00000028941	ZBED3	chr2:44199666-44210609	1810	282.696	395.075	720.011	847.308	551.816	1.11505	0.351716	3.1703	0.00152283	0.00955753
ENSRNOG00000046285	PCDHA9	chr18:29696539-29924444	5239	111.411	112.043	243.176	273.023	181.616	1.11241	0.373323	2.97975	0.00288487	0.0160818
ENSRNOG00000025143	ICAM2	chr10:94317974-94324597	1363	555.135	403.162	993.162	1206.07	775.288	1.11229	0.338302	3.28785	0.00100955	0.00673667
ENSRNOG00000001878	KLHL22	chr11:90730410-90771250	2562	580.777	608.786	1311	1399.53	959.093	1.11212	0.294074	3.78177	0.000155718	0.00141507
ENSRNOG00000018170	SLC27A1	chr16:19859539-19876618	3186	545.52	484.025	1127.85	1218.31	829.803	1.11106	0.300722	3.69464	0.000220201	0.00188243
ENSRNOG00000021041	FAM171A2	chr10:90172343-90181848	2469	167.31	207.934	485.252	379.575	305.384	1.11088	0.372312	2.98375	0.00284742	0.0159287
ENSRNOG00000006623	CD302	chr3:51435506-51469216	1210	1437.2	1276.49	2790.04	3389.23	2184.31	1.11088	0.295962	3.75347	0.000174404	0.00155006
ENSRNOG00000011060	UNC119	chr10:66026833-66032267	1287	233.977	225.262	484.623	565.689	371.027	1.10998	0.330152	3.36204	0.000773702	0.00539775
ENSRNOG00000003759	GALC	chr6:131392302-131454533	3669	219.875	302.66	708.682	499.569	426.821	1.10957	0.387701	2.86191	0.00421092	0.0219937
ENSRNOG00000021110	MLLT11	chr2:215889655-215898937	1365	129.489	143.244	258.046	373.452	221.659	1.10767	0.390401	2.83726	0.00455029	0.0234883
ENSRNOG00000046744	ANKRD29	chr18:3682900-3685174	2274	60.8982	67.0011	147.275	151.83	104.988	1.1074	0.427801	2.5886	0.00963677	0.0434206
ENSRNOG00000023643	MMP17	chr12:32636906-32663693	3509	158.335	125.916	305.879	346.515	230.209	1.10647	0.367589	3.01007	0.00261186	0.0148621
ENSRNOG00000047321	HBA2	chr10:15484460-15485305	545	7027.01	10788.3	15695.5	25631.1	14514.5	1.106	0.386008	2.86521	0.00416732	0.0218286
ENSRNOG00000019822	GADD45B	chr7:11813535-11815565	1276	542.956	335.005	879.873	1142.4	711.787	1.10581	0.377034	2.93291	0.00335803	0.0182728
ENSRNOG00000008944	EXT2	chr3:89303367-89435102	2718	1421.17	1583.77	3249.49	3558.21	2412.32	1.10511	0.287033	3.85012	0.00011806	0.00111385
ENSRNOG00000013947	RABL2A	chr7:130241550-130250156	1801	86.5396	99.3464	204.548	225.296	151.428	1.10464	0.392963	2.81104	0.00493811	0.0250727
ENSRNOG00000042421	RGD1559909	chr5:146614722-146615760	699	139.745	150.175	326.648	336.719	234.59	1.10429	0.353404	3.12473	0.00177969	0.0107705
ENSRNOG00000007628	PTP4A3	chr7:114918556-114924152	1327	600.008	314.212	945.329	1169.33	743.228	1.10361	0.40596	2.71852	0.00655742	0.0315358
ENSRNOG00000015967	SH3BGRL3	chr5:156043498-156044872	755	3284.02	2750.51	5376.79	8433.9	4868.46	1.10333	0.34379	3.2093	0.00133057	0.00847874
ENSRNOG00000020762	ZFP260	chr1:89623199-89626479	3280	538.468	499.043	1223.51	1121.58	832.297	1.10261	0.302408	3.64612	0.000266232	0.00221992
ENSRNOG00000030091	DUSP14	chr10:71277395-71297086	1339	149.361	135.157	260.563	395.492	230.64	1.10111	0.394094	2.79404	0.00520547	0.0261837
ENSRNOG00000003217	LGALS3BP	chr10:107050331-107059670	2152	3532.74	3146.74	7148.5	7902.5	5340.88	1.10008	0.280286	3.92483	8.68e-05	0.000860042
ENSRNOG00000000571	PSAP	chr20:31629575-31668604	2568	23172.1	23428.4	54049.9	50749.1	37248.4	1.09986	0.273949	4.01482	5.95e-05	0.000624376
ENSRNOG00000005106	CC2D2A	chr14:71922810-71997340	4869	76.283	68.1563	174.968	157.952	117.342	1.09917	0.418871	2.62412	0.00868723	0.0398447
ENSRNOG00000017115	CHCHD6	chr4:183964604-184187039	1078	231.413	210.245	453.154	549.771	354.731	1.09843	0.338052	3.24928	0.00115698	0.00756115
ENSRNOG00000027282	CEP68	chr14:104240523-104251658	2205	144.233	137.468	321.613	318.353	226.499	1.09761	0.354689	3.09456	0.00197108	0.0117627
ENSRNOG00000003267	PYCR2	chr13:104182939-104186733	1539	401.287	382.368	754.627	1023.63	629.067	1.09742	0.331294	3.31253	0.000924564	0.00628178
ENSRNOG00000013862	DUSP2	chr3:126303198-126305373	1623	204.49	112.054	380.775	347.739	256.912	1.09665	0.423411	2.59003	0.00959685	0.0432809
ENSRNOG00000028872	RAI14	chr2:84073867-84128487	4608	784.625	1115.91	2524.44	1808.49	1536.08	1.09631	0.365796	2.99706	0.00272593	0.0153762
ENSRNOG00000017567	ANO8	chr16:19747153-19755987	3174	209.618	220.642	537.49	440.796	346.886	1.09613	0.346318	3.16509	0.00155037	0.00969281
ENSRNOG00000020088	KLHL26	chr16:20557871-20582253	3820	123.72	146.709	249.234	375.901	219.92	1.09504	0.402157	2.72292	0.00647069	0.0312528
ENSRNOG00000013790	MFSD1	chr2:184095496-184116407	3075	1289.12	1587.23	3555.37	2934.97	2306.3	1.09503	0.317659	3.44718	0.000566473	0.00416128
ENSRNOG00000019854	NAPSA	chr1:101642883-101655189	1366	1564.76	782.064	2289.05	3114.96	1901.54	1.09445	0.412806	2.65126	0.00801928	0.0372741
ENSRNOG00000016670	PIP4K2A	chr17:87260013-87463891	3384	839.754	733.546	1898.21	1640.74	1258.24	1.09425	0.305326	3.58386	0.000338559	0.00271126
ENSRNOG00000033412	PLSCR2	chr8:99199388-99210702	1286	142.951	118.985	339.865	258.356	211.743	1.09275	0.391185	2.79345	0.0052149	0.0262083
ENSRNOG00000007830	APOLD1	chr4:233025349-233028240	2891	337.184	597.234	1164.35	974.65	756.897	1.09085	0.396971	2.74794	0.00599708	0.0293153
ENSRNOG00000000827	IER3	chr20:5535616-5671944	1097	966.679	1077.79	1879.33	2746.41	1637.5	1.08902	0.332883	3.27146	0.00106993	0.00707472
ENSRNOG00000006683	NEDD4	chr8:73679020-73716822	4786	3974.41	6354.71	13620.4	9853.02	8331.17	1.0884	0.377272	2.88491	0.00391521	0.0207694
ENSRNOG00000050395	MS4A6BL	chr1:234307342-234321124	3309	194.874	134.002	433.643	315.904	265.66	1.08797	0.404921	2.68687	0.00721242	0.0341205
ENSRNOG00000003909	ESYT1	chr7:2897631-2914841	3745	1410.27	1392.01	3471.03	2799.06	2233.68	1.08782	0.304502	3.57247	0.000353636	0.0028171
ENSRNOG00000005214	PLEK	chr14:100353684-100386527	1644	710.906	555.647	1396.59	1441.16	1009.17	1.08627	0.311589	3.48623	0.000489877	0.0036936
ENSRNOG00000010716	ATOH8	chr4:164837903-164870076	2375	89.1037	71.6218	167.415	202.032	130.177	1.08574	0.416114	2.60923	0.00907467	0.0413484
ENSRNOG00000008129	PLA2R1	chr3:51596535-51728234	5599	82.6934	70.4667	168.044	182.441	123.622	1.08514	0.412801	2.62872	0.00857076	0.0394347
ENSRNOG00000003223	DEGS1	chr13:105599915-105606572	1437	751.933	892.963	1883.73	1791.35	1309.1	1.08318	0.303206	3.57241	0.000353709	0.0028171
ENSRNOG00000003291	CREG1	chr13:88852201-88864665	2105	359.62	530.233	1241.77	782.413	718.628	1.08292	0.403186	2.68591	0.00723327	0.0341768
ENSRNOG00000019330	PROCR	chr3:157650398-157654720	1397	257.696	317.678	613.016	682.01	460.035	1.08286	0.333643	3.24557	0.00117214	0.00763449
ENSRNOG00000007707	ZFP467	chr4:142732564-142739034	2834	190.387	160.572	365.04	426.103	280.59	1.0828	0.351404	3.08136	0.00206055	0.0122016
ENSRNOG00000000443	C4A	chr20:6575263-6587996	4689	1539.76	842.134	2148.07	3282.71	1915.96	1.0813	0.407631	2.65264	0.00798656	0.0371694
ENSRNOG00000014713	CSGALNACT2	chr4:216081811-216113012	3636	255.772	289.953	678.472	546.098	435.876	1.07979	0.343908	3.13976	0.00169089	0.0103493
ENSRNOG00000011914	DTNB	chr6:37788346-37986143	3339	137.822	118.985	295.179	284.069	205.611	1.07977	0.366985	2.94229	0.00325798	0.0177816
ENSRNOG00000005678	LAMB1	chr6:59204203-59271185	5505	2311.57	3250.71	6684.01	5769.53	4436.47	1.07921	0.331959	3.25103	0.00114989	0.00752153
ENSRNOG00000003649	QSOX1	chr13:78351222-78388725	2442	699.368	949.567	1723.87	1967.67	1313.25	1.07772	0.32787	3.28704	0.00101245	0.00675292
ENSRNOG00000023313	ARHGEF19	chr5:163483733-163494854	3117	219.875	228.728	395.251	620.788	359.5	1.07673	0.378436	2.84522	0.00443804	0.0230395
ENSRNOG00000013090	GADD45G	chr17:15469300-15471060	1073	1243.61	1242.99	2054.3	3556.98	1986.21	1.07601	0.364363	2.95311	0.00314589	0.0172864
ENSRNOG00000018434	STAB1	chr16:7149122-7179494	7821	1444.89	1379.3	3448.37	2811.3	2236.3	1.07487	0.302858	3.5491	0.000386545	0.00302732
ENSRNOG00000015756	NPHP1	chr3:126969056-127017983	1943	99.3602	109.743	199.513	274.273	167.727	1.0735	0.402014	2.67031	0.00757818	0.0355528
ENSRNOG00000009149	JAM3	chr8:28166275-28227631	1881	207.054	268.004	522.385	541.2	378.328	1.07348	0.346691	3.09637	0.00195903	0.0117099
ENSRNOG00000014453	ANXA5	chr2:142777626-142808368	1487	3128.89	4216.45	8541.32	7793.52	5829.24	1.07324	0.317493	3.38036	0.00072392	0.00510423
ENSRNOG00000008291	THUMPD2	chr6:3710780-3762198	1821	130.771	106.278	238.535	295.089	189.372	1.07215	0.385974	2.77778	0.00547312	0.0272571
ENSRNOG00000020970	RUNDC3A	chr10:90130415-90139535	2050	121.796	107.433	198.884	322.026	183.974	1.0709	0.421179	2.54262	0.0110025	0.0483409
ENSRNOG00000031731	FAM216A	chr12:41560317-41569453	1238	180.13	160.572	350.565	410.185	270.796	1.06949	0.349689	3.05841	0.00222518	0.0130073
ENSRNOG00000018198	DAPK1	chr17:6525246-6683920	5878	387.825	489.801	1120.3	833.84	697.796	1.06721	0.354027	3.01448	0.00257419	0.014711
ENSRNOG00000015177	SUN2	chr7:120941355-120958528	3692	940.397	976.137	2151.85	2063.17	1508.5	1.06573	0.287291	3.70958	0.000207606	0.00179159
ENSRNOG00000007989	CHST1	chr3:88201236-88216361	2701	317.312	188.296	661.478	472.632	403.535	1.06538	0.414031	2.57319	0.0100765	0.0451088
ENSRNOG00000017359	ITM2C	chr9:92645769-92659580	1921	3071.19	2948.05	6470.66	6740.51	4729.3	1.06497	0.273842	3.88899	0.000100663	0.000972389
ENSRNOG00000020590	ADAM15	chr2:208071875-208082511	2800	1277.58	1484.42	2904.59	3168.84	2172.94	1.06213	0.292813	3.62733	0.000286363	0.00236075
ENSRNOG00000013481	CDH11	chr19:2374107-2531571	5173	702.573	991.154	2112.83	1644.42	1343.03	1.06164	0.353231	3.00552	0.00265127	0.0150335
ENSRNOG00000018419	ZFP275	chr1:153203959-153220664	6205	116.027	168.658	354.97	284.069	227.618	1.06049	0.405754	2.61364	0.00895837	0.0408824
ENSRNOG00000010252	HEXA	chr8:64087246-64112585	1788	2327.59	2386.62	4697.06	5651.99	3702.18	1.06033	0.28702	3.69426	0.000220531	0.00188406
ENSRNOG00000026178	ADPGK	chr8:63850862-63878782	2579	491.032	661.925	1369.53	1176.68	911.134	1.05924	0.338606	3.12823	0.00175861	0.0106819
ENSRNOG00000047194	ARL13B	chr7:1111828-1181765	3535	167.31	150.175	402.174	301.211	251.218	1.05706	0.378186	2.79508	0.00518867	0.0261082
ENSRNOG00000046829	KDR	chr14:34557360-34618109	5873	607.059	745.098	1486.6	1480.34	1062.7	1.05614	0.309492	3.41251	0.000643685	0.00462812
ENSRNOG00000009949	PCDH18	chr2:158301954-158315635	4888	145.515	183.675	444.972	291.415	262.822	1.05459	0.409798	2.57343	0.0100695	0.0450915
ENSRNOG00000020956	BCAT2	chr1:102633421-102650872	1533	501.288	377.747	914.489	1012.61	689.639	1.05186	0.327578	3.21103	0.00132259	0.00843157
ENSRNOG00000002680	LAMC1	chr13:75622194-75749168	7636	2492.34	3114.4	6291.28	5951.97	4393.15	1.05154	0.301605	3.48649	0.000489402	0.0036936
ENSRNOG00000019740	HDGFRP3	chr1:144605596-144694902	2746	215.387	240.28	531.826	466.509	357.943	1.05121	0.339857	3.09311	0.00198074	0.0118106
ENSRNOG00000028416	LOC689959	chr8:53761297-53768954	1347	230.772	255.297	434.272	641.604	383.503	1.0505	0.366493	2.86635	0.00415234	0.0217893
ENSRNOG00000037242	DNASE1L1	chr1:152169731-152178213	1513	558.34	410.093	986.868	1135.05	759.274	1.05045	0.332067	3.16337	0.00155952	0.0097375
ENSRNOG00000011899	TMEM150A	chr4:164989420-164999568	1449	580.777	408.938	935.259	1246.47	778.54	1.05031	0.354285	2.96459	0.00303087	0.0167746
ENSRNOG00000016031	BICD2	chr17:17731018-17775591	4568	640.393	673.476	1344.98	1518.3	1026.71	1.04975	0.295846	3.54829	0.000387747	0.00303347
ENSRNOG00000007077	FEM1B	chr8:67424000-67437273	2199	116.668	151.33	291.403	302.435	211.808	1.04924	0.377546	2.77909	0.00545106	0.0271779
ENSRNOG00000010771	PKD1	chr10:13732198-13813550	13837	614.751	701.201	1474.64	1393.41	1029.71	1.04896	0.30235	3.46936	0.000521708	0.00388931
ENSRNOG00000011829	RPGRIP1L	chr19:28182501-28274100	7081	101.924	95.8809	216.507	220.398	156.172	1.04547	0.384324	2.72029	0.00652254	0.0314095
ENSRNOG00000010389	NDRG2	chr15:32118799-32127444	1990	608.341	638.821	1266.31	1442.38	972.359	1.04354	0.297672	3.50567	0.000455462	0.00348498
ENSRNOG00000000164	LAMP2	chrX:124809052-124852469	1747	2614.14	2909.93	5895.4	6059.72	4299.93	1.0429	0.281265	3.70788	0.000209001	0.00180126
ENSRNOG00000007100	CCDC136	chr4:56444661-56471661	3228	83.3344	94.7257	183.15	210.603	140.618	1.04184	0.402071	2.59119	0.00956458	0.0431487
ENSRNOG00000020233	RABAC1	chr1:83095961-83099071	831	1242.96	940.326	1908.28	2873.75	1709.23	1.04134	0.352608	2.95325	0.00314449	0.0172852
ENSRNOG00000011622	ECHDC1	chr1:32308392-32350239	1863	208.336	220.642	509.168	426.103	335.862	1.04025	0.345526	3.01064	0.00260699	0.0148402
ENSRNOG00000019689	VWF	chr4:225163214-225229122	6156	483.981	786.685	1518.69	1268.51	999.947	1.03858	0.376283	2.76011	0.00577821	0.0284362
ENSRNOG00000034198	WBP5	chrX:106336504-106338637	1013	1853.87	1728.17	3798.94	3909.62	2777.11	1.0366	0.278295	3.72481	0.000195464	0.00171011
ENSRNOG00000016592	GNAI2	chr8:115726575-115746724	2203	5764.82	5872.99	13241.5	11771.7	9022.53	1.035	0.28228	3.66657	0.000245829	0.00206994
ENSRNOG00000009628	PFKM	chr7:138833720-138857275	2883	348.081	324.609	714.976	738.334	522.889	1.0342	0.310318	3.33272	0.000860005	0.00589816
ENSRNOG00000029571	COQ10A	chr7:2759393-2765320	1287	195.515	143.244	343.012	396.717	265.128	1.03402	0.37161	2.78253	0.00539366	0.0269628
ENSRNOG00000033697	CASP4	chr8:2658132-2673885	1178	262.183	153.64	444.342	466.509	326.131	1.03287	0.397194	2.6004	0.00931139	0.042242
ENSRNOG00000005825	LYC2	chr7:60337950-60343246	1190	57795.6	54052.5	129718	110307	86630.3	1.03268	0.287459	3.59246	0.000327566	0.00264211
ENSRNOG00000028380	CCDC66	chr16:3075031-3105389	2753	120.514	121.295	274.41	253.458	189.247	1.03161	0.370744	2.78255	0.00539339	0.0269628
ENSRNOG00000001385	PLBD2	chr12:43452898-43472080	2190	1350.66	1264.93	2633.33	2985.17	2024.28	1.03115	0.28538	3.61324	0.000302395	0.00247055
ENSRNOG00000020848	ADCK4	chr1:85255490-85278009	2096	471.16	438.973	874.209	1089.75	706.193	1.03073	0.31515	3.27061	0.00107316	0.00709186
ENSRNOG00000001436	YWHAG	chr12:25788285-25816531	1604	1702.59	1594.16	2952.42	4172.87	2559.29	1.03053	0.318264	3.23798	0.00120379	0.00781098
ENSRNOG00000016343	DKK3	chr1:183922625-183961795	2335	473.083	691.959	1447.57	1084.85	911.441	1.02977	0.370185	2.78177	0.00540634	0.0270076
ENSRNOG00000008300	ZBTB8A	chr5:151276505-151303640	1982	153.848	154.796	292.032	380.799	241.249	1.02969	0.366263	2.81133	0.00493364	0.0250587
ENSRNOG00000011951	PLK2	chr2:60970299-60976058	2770	501.929	600.699	1227.92	1147.29	856.123	1.02956	0.313072	3.28859	0.00100692	0.00672528
ENSRNOG00000019553	IPO4	chr15:38194619-38204540	3717	737.189	917.222	1746.53	1814.61	1283.32	1.02955	0.308382	3.33856	0.000842144	0.00578929
ENSRNOG00000037567	RGD1309730	chr3:97747218-97833544	815	189.746	167.503	340.495	438.347	279.059	1.02941	0.358864	2.86852	0.00412396	0.0216873
ENSRNOG00000015991	NPR2	chr5:63653694-63672094	3460	228.849	229.883	473.294	517.936	356.554	1.02929	0.327489	3.14297	0.00167244	0.0102493
ENSRNOG00000001383	SLC24A6	chr12:43421506-43444143	2665	562.828	438.973	1122.81	1033.42	776.998	1.02893	0.321938	3.19603	0.00139331	0.00882834
ENSRNOG00000007584	EHD4	chr3:118425619-118489608	3428	1713.48	2027.36	4400.62	3629.22	2899.04	1.02739	0.310827	3.30535	0.000948573	0.00640903
ENSRNOG00000003050	TBC1D9B	chr10:35397654-35436143	5645	750.01	1044.29	2125.42	1749.72	1396.55	1.0272	0.343087	2.994	0.00275342	0.0154742
ENSRNOG00000049683	SH3GL1	chr9:10018262-10040574	2006	1714.77	1619.58	3311.17	3831.25	2575.52	1.02707	0.284744	3.607	0.000309755	0.00252078
ENSRNOG00000017250	GMPR	chr17:21568731-21606386	1432	203.849	188.296	378.257	470.183	304.686	1.02617	0.347652	2.95172	0.0031601	0.0173448
ENSRNOG00000004893	ATP5S	chr6:101507335-101525541	1990	87.8216	98.1912	180.003	226.52	145.722	1.02482	0.404025	2.53652	0.0111959	0.0490056
ENSRNOG00000036829	NCKAP1L	chr7:142849493-142894585	4623	1010.27	804.013	2215.42	1676.25	1405.09	1.02331	0.335149	3.0533	0.00226342	0.0132149
ENSRNOG00000008517	CDC42EP1	chr7:120058684-120069133	2235	696.163	756.65	1267.57	1867.26	1126.66	1.02253	0.337456	3.03012	0.00244455	0.0141029
ENSRNOG00000023338	TSPAN2	chr2:224590997-224633368	3842	505.135	540.629	1149.88	1086.07	807.757	1.02237	0.301909	3.38636	0.000708273	0.00502308
ENSRNOG00000047931	TMSB4X	chrX:28985068-28987071	606	67805.3	44309.7	105747	135515	86782.8	1.02133	0.343863	2.97017	0.00297633	0.0165355
ENSRNOG00000008441	MAP3K3	chr10:94029305-94098038	4610	790.395	828.272	1846.6	1602.78	1247.83	1.02001	0.300923	3.38962	0.000699893	0.00497091
ENSRNOG00000019080	HSD3B7	chr1:206270897-206274168	1795	542.315	445.904	917.007	1203.62	763.65	1.01984	0.330472	3.08602	0.00202856	0.0120465
ENSRNOG00000001034	EVI5L	chr12:4740788-4763811	2928	237.25	228.251	473.051	523.851	359.481	1.01967	0.327664	3.11195	0.00185856	0.0112013
ENSRNOG00000018372	CUL9	chr9:15654760-15745377	7668	196.156	185.986	382.663	438.347	295.741	1.01966	0.34036	2.99583	0.002737	0.0154132
ENSRNOG00000048053	SLFN1	chr10:70029872-70031195	742	353.21	272.625	496.581	866.899	488.041	1.01899	0.399845	2.54845	0.0108202	0.0476869
ENSRNOG00000003550	ACBD6	chr13:78130761-78265044	1475	488.468	415.869	784.837	1159.54	699.405	1.01675	0.34994	2.90549	0.00366679	0.0196231
ENSRNOG00000003248	MPZL1	chr13:88685411-88722184	2266	493.596	701.201	1341.21	1219.54	924.898	1.01528	0.342897	2.96089	0.00306756	0.0169134
ENSRNOG00000012662	LYST	chr17:91981717-92183054	13076	551.93	621.493	1347.5	1148.52	903.79	1.01455	0.314366	3.2273	0.00124964	0.00805824
ENSRNOG00000028350	ARSE	chr2:142502843-142510517	2435	378.21	298.039	709.941	732.212	520.854	1.01448	0.326832	3.10398	0.00190936	0.0114648
ENSRNOG00000006411	CAV2	chr4:45179464-45186995	2643	406.415	456.3	1071.83	770.169	666.441	1.013	0.350087	2.89356	0.00380906	0.0202876
ENSRNOG00000025730	ARMCX3	chrX:105463206-105466731	1935	397.441	592.613	1120.3	1001.59	766.427	1.01161	0.357705	2.82805	0.00468318	0.0240465
ENSRNOG00000017991	CDK20	chr17:1924303-1931006	2117	204.49	207.934	477.07	401.614	317.901	1.01073	0.345963	2.92148	0.00348368	0.0188299
ENSRNOG00000013328	RBPMS	chr16:61619192-61767832	663	252.567	308.436	599.799	596.299	432.396	1.01046	0.332631	3.03777	0.00238332	0.0138153
ENSRNOG00000050430	VAV1	chr9:8626679-8682495	2595	280.132	262.228	723.787	439.572	420.696	1.01026	0.393868	2.56496	0.0103187	0.0458831
ENSRNOG00000046891	HK1	chr20:33703471-33770509	3454	607.7	650.373	1450.72	1215.86	966.631	1.00991	0.311525	3.24182	0.00118768	0.00772361
ENSRNOG00000030021	CCL6	chr10:70430599-70436258	1374	1835.92	1240.68	2833.47	3739.42	2369.48	1.00966	0.347038	2.90938	0.00362151	0.0194164
ENSRNOG00000020616	YIF1B	chr1:88361279-88372142	1140	460.903	456.3	848.404	1104.44	704.934	1.00948	0.320724	3.14751	0.00164666	0.0101382
ENSRNOG00000012471	THBS4	chr2:41549117-41590922	3039	264.747	354.644	579.659	746.905	478.582	1.00655	0.357691	2.81401	0.00489274	0.0248691
ENSRNOG00000024239	FAM89B	chr1:228018857-228020412	1190	807.062	690.804	1367.01	1813.39	1149.12	1.00628	0.320417	3.14052	0.00168645	0.0103281
ENSRNOG00000021106	GRAMD1A	chr1:90718528-90740144	2624	1066.04	690.804	1794.99	1939.5	1349.96	1.00587	0.344914	2.91631	0.00354198	0.0190814
ENSRNOG00000013463	KCNJ8	chr4:240996201-241003064	2344	690.393	644.597	1377.08	1438.71	1021.03	1.00555	0.29158	3.44861	0.00056347	0.00414549
ENSRNOG00000026573	OPHN1	chrX:69063673-69437472	3739	116.027	154.796	260.563	322.026	209.954	1.00484	0.391028	2.56975	0.0101772	0.0454203
ENSRNOG00000015655	PTGFRN	chr2:222873518-222931395	5771	2067.97	2986.17	5686.45	5047.12	3888.27	1.00463	0.335346	2.9958	0.00273728	0.0154132
ENSRNOG00000014637	ATXN10	chr7:125942295-126065027	1808	1472.45	1468.25	3083.33	3101.49	2244.9	1.0041	0.279072	3.598	0.000320676	0.00259516
ENSRNOG00000020167	REEP5	chr18:26842002-26873146	2900	2252.59	2246.85	4264.05	5228.33	3439.2	1.00396	0.28948	3.46816	0.000524036	0.00390349
ENSRNOG00000050780	FPGS	chr3:17058729-17068931	2554	562.187	447.059	799.942	1365.24	778.605	1.0032	0.382296	2.62415	0.00868647	0.0398447
ENSRNOG00000002099	WDFY3	chr14:9200911-9346382	13709	828.857	999.24	1976.88	1878.28	1398.97	1.00217	0.304421	3.29204	0.000994636	0.00666154
ENSRNOG00000031058	WAS	chrX:15937991-15946867	1346	680.137	406.627	1095.75	1217.09	835.541	1.00088	0.369706	2.70724	0.00678456	0.0323716
ENSRNOG00000014798	RGD1309540	chr3:86803732-87050021	1570	287.824	188.296	498.469	515.487	366.086	1.00064	0.372037	2.68962	0.0071534	0.0338874
ENSRNOG00000017291	SORD	chr3:120716969-120746949	2148	816.677	834.048	1491.63	1995.83	1262.64	0.999893	0.31448	3.17952	0.00147521	0.0092947
ENSRNOG00000010204	TMEM9	chr13:57910155-57927429	1120	356.415	317.678	640.709	782.413	515.374	0.998478	0.323997	3.08175	0.00205784	0.0121955
ENSRNOG00000006901	CD320	chr7:18878074-18883844	1173	849.37	769.357	1459.53	1954.2	1236.17	0.998275	0.316727	3.15185	0.00162239	0.0100184
ENSRNOG00000023309	ANKS6	chr5:67163439-67204853	4367	175.643	229.883	383.292	479.978	311.974	0.994862	0.367559	2.70668	0.00679605	0.0324052
ENSRNOG00000019212	TPP1	chr1:177593886-177600020	2470	1486.56	1599.94	3300.47	3155.37	2348.65	0.994837	0.284656	3.49488	0.00047428	0.00359836
ENSRNOG00000018823	NISCH	chr16:7182944-7219131	5107	2778.88	2662.72	5595.19	5759.74	4132.31	0.993632	0.274494	3.61986	0.000294761	0.00241224
ENSRNOG00000019536	SMIM3	chr18:54978251-55005211	1701	553.853	730.081	1399.74	1300.35	980.974	0.993043	0.326417	3.04225	0.00234814	0.0136222
ENSRNOG00000051238	MPHOSPH8	chr15:40718851-40799440	2866	423.716	336.427	800.135	794.925	579.305	0.993016	0.323122	3.07319	0.0021178	0.0124747
ENSRNOG00000023013	MARCH3	chr18:51040247-51192562	1764	252.567	169.813	414.761	481.203	324.127	0.992058	0.375167	2.64431	0.00818579	0.0379511
ENSRNOG00000015415	RHOQ	chr6:20521667-20580952	3859	1205.14	1577.99	3092.77	2743.96	2122.99	0.991461	0.319664	3.10157	0.00192496	0.0115442
ENSRNOG00000037765	LIMS1	chr20:29774110-29824244	3964	1153.22	1545.65	3100.95	2567.64	2061.66	0.991233	0.331938	2.9862	0.00282472	0.0158262
ENSRNOG00000014957	TPGS2	chr18:17093463-17148510	2352	571.161	651.528	1212.82	1348.1	930.756	0.991122	0.303784	3.26259	0.00110398	0.0072684
ENSRNOG00000003069	CD38	chr14:71745754-71785718	2753	873.729	520.991	1588.55	1354.22	1067.51	0.990669	0.373716	2.65086	0.0080287	0.0373059
ENSRNOG00000025462	WDR41	chr2:43827384-43876536	1748	307.055	361.575	680.989	722.416	509.788	0.989522	0.322195	3.07119	0.00213209	0.0125437
ENSRNOG00000010663	COL6A5	chr8:113904373-113991799	7849	669.88	823.651	1874.92	1268.51	1143.67	0.989416	0.359935	2.74887	0.00598008	0.0292518
ENSRNOG00000020325	CALHM2	chr1:274338779-274344504	1831	259.619	219.486	448.119	559.566	365.393	0.988991	0.345066	2.86609	0.00415576	0.0217994
ENSRNOG00000003269	ATP6V0E1	chr10:16661967-16685040	835	1598.74	1365.44	2761.09	3429.64	2249.83	0.988227	0.302587	3.26593	0.00109107	0.00719492
ENSRNOG00000012495	PODXL	chr4:58581514-58628079	5149	545.52	681.563	1202.12	1370.14	934.68	0.987618	0.317957	3.10613	0.00189551	0.0113911
ENSRNOG00000007443	JAG1	chr3:136558687-136594097	5578	324.363	396.231	699.87	808.127	547.969	0.985187	0.328724	2.997	0.00272648	0.0153762
ENSRNOG00000020110	B3GNT1	chr1:227347040-227349263	1980	167.31	142.089	294.55	355.086	235.698	0.983975	0.363968	2.70347	0.00686206	0.0326772
ENSRNOG00000009625	DPYSL2	chr15:48053083-48120298	4365	1854.51	2003.1	4172.79	3821.46	2918.04	0.98202	0.28695	3.42227	0.000621007	0.0044872
ENSRNOG00000001817	TM7SF3	chr4:245073412-245110560	2047	613.469	665.39	1289.6	1364.02	967.388	0.981902	0.295768	3.31984	0.000900691	0.00613101
ENSRNOG00000020480	FADS1	chr1:233178775-233193796	3372	790.395	709.287	1545.76	1553.81	1131.53	0.978272	0.292297	3.34684	0.000817379	0.00563234
ENSRNOG00000016511	PITRM1	chr17:70194248-70225893	3178	533.981	591.458	1193.3	1136.27	850.265	0.977091	0.302664	3.22831	0.00124526	0.00803705
ENSRNOG00000032136	CDC42EP3	chr6:1912345-1932818	1904	417.954	581.061	1114.63	967.303	758.981	0.976266	0.346573	2.81691	0.00484874	0.0246878
ENSRNOG00000009513	AKR1B1	chr4:61426189-61440279	1339	1987.2	1772.06	3600.05	4164.3	2833.13	0.976042	0.287534	3.39453	0.000687471	0.00489223
ENSRNOG00000020138	SLC4A3	chr9:82512288-82524380	3879	128.207	117.829	237.276	277.947	187.083	0.974603	0.373861	2.60686	0.00913764	0.0415703
ENSRNOG00000039730	ORAI3	chr1:206239786-206244645	1823	288.465	288.798	519.868	680.785	436.93	0.974423	0.336842	2.89282	0.00381802	0.0203205
ENSRNOG00000021161	FERMT3	chr1:229241773-229263064	2455	1424.38	1120.54	2856.13	2399.89	1920.72	0.97384	0.316668	3.07528	0.00210308	0.0124055
ENSRNOG00000000991	ARPC1B	chr12:13321398-13334967	1516	10230.3	9636.6	19425.8	21383.5	14923.7	0.971219	0.273382	3.55261	0.000381427	0.00299044
ENSRNOG00000000974	ZFP358	chr12:4209517-4213611	2031	228.849	234.504	433.013	530.18	350.807	0.970773	0.337655	2.87505	0.00403968	0.0213287
ENSRNOG00000002434	TMEM100	chr10:77399482-77405339	1400	457.057	384.679	1013.93	729.763	637.235	0.970702	0.352473	2.75398	0.00588761	0.0288965
ENSRNOG00000000774	GABBR1	chr20:3996332-4025427	4492	612.828	411.248	1080.02	1039.54	773.413	0.969733	0.346859	2.79576	0.00517783	0.0260627
ENSRNOG00000012771	DDX41	chr17:11740660-11746052	2049	1373.74	1298.43	2498.64	2998.64	2008.57	0.969292	0.291378	3.32658	0.000879177	0.00600916
ENSRNOG00000014171	TNFSF13	chr10:56032610-56035590	1638	614.11	732.391	1456.39	1315.04	1013.87	0.967476	0.311993	3.10095	0.00192899	0.0115636
ENSRNOG00000017628	TAGLN	chr8:48824387-48852863	1422	16228.4	18029.1	27428.4	43619.2	25857.7	0.965858	0.341068	2.83186	0.00462774	0.0238122
ENSRNOG00000004794	RTN1	chr6:104395868-104615205	1495	178.848	150.175	356.858	324.475	248.6	0.965737	0.359318	2.6877	0.00719469	0.0340497
ENSRNOG00000008810	NSMF	chr3:2243539-2252243	2695	358.979	381.213	755.885	764.047	556.175	0.964389	0.309195	3.11903	0.00181446	0.0109537
ENSRNOG00000010574	PTPN1	chr3:170816919-170866072	4127	1071.17	1204.86	2434.44	2222.35	1706.96	0.962066	0.296128	3.24882	0.00115886	0.00756773
ENSRNOG00000015447	LOC100912282	chr7:143218502-143233218	2945	523.084	395.075	846.516	1043.22	690.05	0.961557	0.33574	2.864	0.00418332	0.0219045
ENSRNOG00000000474	RGL2	chr20:7517122-7524877	2867	985.269	825.962	1663.45	2050.93	1357.95	0.961415	0.309076	3.11061	0.00186704	0.0112478
ENSRNOG00000008217	MADCAM1	chr7:13087424-13090827	1279	245.516	278.401	533.085	543.649	394.01	0.960888	0.327505	2.93397	0.00334657	0.0182173
ENSRNOG00000033593	OSBPL9	chr5:132534675-132679332	2762	1533.35	1325	2995.22	2837.01	2138.77	0.960763	0.290174	3.31098	0.000929685	0.00630187
ENSRNOG00000029399	BCAM	chr1:81939821-81954480	2358	822.446	764.737	1489.11	1755.84	1188.06	0.959666	0.296832	3.23303	0.00122484	0.00792287
ENSRNOG00000003730	AIDA	chr13:100906567-100933399	2673	850.011	1029.28	1993.88	1848.9	1409.03	0.959055	0.306764	3.12636	0.00176987	0.01072
ENSRNOG00000017403	APOBR	chr1:204978095-204987653	3481	435.903	463.232	889.943	947.712	673.41	0.958518	0.30344	3.15884	0.00158399	0.00983963
ENSRNOG00000018752	CLCF1	chr1:226338539-226342117	1855	130.771	123.605	245.458	281.62	192.287	0.958039	0.369587	2.59219	0.00953672	0.043063
ENSRNOG00000008168	WNT5B	chr4:217413754-217429687	2122	257.696	201.003	478.958	461.612	344.479	0.95546	0.346197	2.75987	0.00578236	0.028447
ENSRNOG00000038686	AP1S2	chrX:32691540-32717097	1811	501.288	430.886	958.546	937.917	696.166	0.953314	0.307996	3.09522	0.00196667	0.0117412
ENSRNOG00000004766	GLIS2	chr10:9920015-9940219	3360	208.336	227.573	514.203	380.799	328.064	0.953074	0.366578	2.59992	0.00932455	0.0422885
ENSRNOG00000003099	UBQLN2	chrX:19487981-19491373	3392	425.646	456.3	867.915	926.897	658.666	0.951792	0.304663	3.12408	0.00178363	0.0107855
ENSRNOG00000006358	ITGB1BP1	chr6:60216648-60231041	1317	489.75	457.456	906.307	1019.95	706.584	0.951223	0.303774	3.13135	0.00174007	0.0105924
ENSRNOG00000019475	SH3BP5	chr16:7408998-7472907	2550	547.443	519.836	1236.73	931.794	797.444	0.948441	0.332163	2.85535	0.00429897	0.0224054
ENSRNOG00000008075	IFT74	chr5:117537608-117629815	2108	248.721	177.899	445.601	427.328	319.855	0.948064	0.362973	2.61194	0.00900304	0.0410477
ENSRNOG00000015416	NABP1	chr9:54750052-54757517	2287	461.544	492.111	999.455	935.468	711.055	0.947569	0.305385	3.10287	0.00191654	0.0115032
ENSRNOG00000014237	ZFP503	chr15:2357097-2360886	3101	219.875	256.452	528.679	442.021	356.491	0.947272	0.349082	2.71361	0.00665554	0.0318492
ENSRNOG00000004421	TMEM5	chr7:64550352-64562127	1521	265.388	325.764	572.736	631.808	441.904	0.947005	0.334244	2.83328	0.00460735	0.0237408
ENSRNOG00000012959	NAB1	chr9:53571212-53610614	4525	544.238	792.461	1387.15	1338.31	1000.07	0.945776	0.343736	2.75146	0.00593308	0.0290707
ENSRNOG00000021412	SLFN13	chr10:69956874-69973195	3369	1344.89	963.429	2610.67	2072.97	1721.98	0.945193	0.340821	2.77329	0.00554934	0.0275237
ENSRNOG00000007237	ID2	chr6:53083848-53086239	1292	1016.68	966.895	2109.68	1891.75	1473.95	0.944038	0.293072	3.22118	0.00127665	0.00819608
ENSRNOG00000009243	OAF	chr8:45980601-45998572	1693	2523.11	2012.34	3851.81	5361.8	3377.27	0.943705	0.326589	2.88958	0.00385756	0.0204926
ENSRNOG00000029939	GYPC	chr18:25028315-25060325	2192	260.26	272.625	575.253	505.691	397.495	0.943443	0.330891	2.85122	0.00435514	0.0226657
ENSRNOG00000020812	GYS1	chr1:102506604-102526038	3691	335.261	378.903	710.57	734.661	531.601	0.942724	0.315694	2.98619	0.00282474	0.0158262
ENSRNOG00000008190	LOC100911867	chr3:2164204-2243126	4537	654.495	503.663	1147.99	1192.6	860.699	0.941879	0.317086	2.97042	0.00297391	0.0165335
ENSRNOG00000020905	HDAC5	chr10:89927485-89938344	2930	640.393	604.165	1258.13	1248.92	923.156	0.941597	0.293777	3.20515	0.00134993	0.00859461
ENSRNOG00000001289	LOC498154	chr12:19264598-19367357	1442	317.312	347.713	662.737	682.01	494.681	0.941127	0.315569	2.98232	0.00286071	0.0159847
ENSRNOG00000024823	AIFM2	chr20:33137030-33152531	3416	295.517	281.867	568.33	601.197	429.814	0.941101	0.317586	2.96329	0.00304367	0.0168262
ENSRNOG00000001229	COL18A1	chr20:14388742-14495241	5007	5149.42	6264.6	11589.4	11408.1	8472.07	0.940197	0.292739	3.21172	0.00131942	0.00841876
ENSRNOG00000020102	SIRT2	chr1:88130544-88153084	2042	1644.25	1385.07	2647.8	3470.05	2247.75	0.938839	0.31229	3.00631	0.00264441	0.0150004
ENSRNOG00000002101	PAICS	chr14:33354798-33405832	1964	960.91	755.495	1637.65	1820.73	1272.6	0.938686	0.309203	3.03582	0.0023988	0.0138995
ENSRNOG00000013215	DCTD	chr16:46903569-46933233	1806	283.978	313.057	667.772	537.527	444.272	0.936322	0.340809	2.74735	0.00600783	0.0293579
ENSRNOG00000008415	NAB2	chr7:71135885-71142278	3366	1388.48	1308.83	2512.48	2901.91	1994.77	0.935857	0.286987	3.26098	0.00111029	0.00730188
ENSRNOG00000016496	CTSC	chr1:158231465-158263672	2459	5643.66	8317.38	13956.5	14272	10387.4	0.935838	0.330997	2.82733	0.0046938	0.0240671
ENSRNOG00000018916	BCL7C	chr1:206178925-206182756	986	1220.53	987.688	1772.33	2703.55	1641.44	0.934179	0.347705	2.6867	0.00721613	0.0341205
ENSRNOG00000001163	SRSF9	chr12:48833031-48839338	1096	514.109	473.628	917.007	1068.93	731.346	0.934036	0.306368	3.04874	0.00229804	0.0133795
ENSRNOG00000000900	TPST1	chr12:31983441-32043407	1620	173.079	187.141	387.698	339.168	267.732	0.932242	0.353255	2.639	0.00831505	0.0384403
ENSRNOG00000011150	ARSB	chr2:42559882-42719688	3768	569.879	760.116	1476.53	1203.62	988.54	0.93211	0.341503	2.72943	0.00634437	0.0307344
ENSRNOG00000020938	PPP1R15A	chr1:102590678-102593734	2009	636.547	555.647	1137.92	1248.92	880.591	0.92947	0.301254	3.08534	0.00203319	0.0120642
ENSRNOG00000020726	SIPA1	chr1:227941670-227953682	3520	1419.89	1127.47	2701.93	2388.87	1880.52	0.929173	0.30939	3.00324	0.00267119	0.0151288
ENSRNOG00000016340	PLCG1	chr3:162957125-162987842	5082	1642.97	1694.67	3169.56	3490.86	2460.05	0.928592	0.281047	3.30404	0.000953026	0.00642719
ENSRNOG00000000922	SUMF2	chr12:32407453-32432604	1466	305.132	303.815	567.701	653.848	450.346	0.928552	0.319749	2.904	0.00368428	0.0197023
ENSRNOG00000002544	KIFAP3	chr13:86953393-87089644	3540	468.596	523.302	1024	959.956	732.825	0.927858	0.308024	3.01229	0.00259284	0.0147798
ENSRNOG00000031367	HPRT1	chrX:153249882-153281841	1223	912.832	843.29	1730.79	1768.08	1293.18	0.926693	0.287731	3.22069	0.00127883	0.00820289
ENSRNOG00000043098	MT2A	chr19:11283093-11283867	382	818.6	1072.02	1505.48	2320.3	1404.34	0.925837	0.361521	2.56095	0.0104387	0.046374
ENSRNOG00000016991	ARL2BP	chr19:10747792-10757367	1999	1138.48	1292.66	2462.76	2381.52	1791.49	0.925603	0.292198	3.16773	0.00153636	0.00961938
ENSRNOG00000001843	BCL6	chr11:80454013-80477192	3389	411.544	276.091	726.934	655.072	509.472	0.925267	0.360633	2.56568	0.0102975	0.0458167
ENSRNOG00000020225	DLGAP4	chr3:158850470-158944119	3320	901.935	821.341	1460.16	1989.71	1271.16	0.924442	0.319345	2.8948	0.00379397	0.0202368
ENSRNOG00000042426	CYP4V3	chr16:49834759-49859697	3191	373.082	499.043	975.539	773.842	646.318	0.923308	0.354075	2.60767	0.00911621	0.0415117
ENSRNOG00000013805	TNIP2	chr14:82175495-82192493	2109	312.824	311.902	689.171	559.566	461.716	0.923266	0.334059	2.76378	0.00571362	0.0281946
ENSRNOG00000000633	RHOBTB1	chr20:22756928-22831478	5088	325.645	354.644	680.989	678.337	502.184	0.922927	0.314796	2.93183	0.00336974	0.0183092
ENSRNOG00000027252	PLA1A	chr11:67166384-67203665	1719	447.442	367.351	784.837	837.513	599.488	0.921987	0.31714	2.90719	0.00364687	0.0195453
ENSRNOG00000001469	ELN	chr12:26978752-27022484	3434	2770.55	2081.65	3873.2	5867.49	3583.18	0.920957	0.349688	2.63366	0.00844711	0.0389766
ENSRNOG00000003901	CCDC104	chr14:113294067-113319546	1436	582.059	447.059	945.329	1105.66	757.258	0.919094	0.32601	2.81922	0.00481402	0.0245565
ENSRNOG00000003368	TSPYL2	chrX:64051728-64430663	2709	302.568	244.901	586.582	505.691	404.088	0.919022	0.343132	2.67834	0.00739889	0.0348238
ENSRNOG00000018020	APBB1	chr1:177393535-177409951	2537	217.31	189.451	358.747	453.041	299.395	0.916396	0.353029	2.59581	0.00943691	0.0426918
ENSRNOG00000006997	APP	chr11:28049095-28265240	2938	7269.96	10260.4	19636.7	15290.7	12933.4	0.915794	0.342989	2.67004	0.0075842	0.0355585
ENSRNOG00000009205	LMO4	chr2:268752256-268775408	1594	842.959	914.911	1572.82	1916.24	1290.42	0.915735	0.301999	3.03225	0.0024274	0.0140189
ENSRNOG00000000826	FLOT1	chr20:5524709-5535207	1697	1617.33	1465.94	2667.94	3448.01	2261.18	0.915161	0.303644	3.01393	0.00257885	0.0147202
ENSRNOG00000006388	PYGL	chr6:102045138-102091169	2767	577.571	790.151	1324.84	1397.08	1006.87	0.913962	0.329642	2.77259	0.00556123	0.0275639
ENSRNOG00000023851	IGSF3	chr2:223212464-223299218	6565	961.551	1256.85	1871.15	2555.39	1633.69	0.912936	0.33878	2.69477	0.00704362	0.0334423
ENSRNOG00000017901	ACY3	chr1:226104424-226107749	1305	242.952	279.556	477.699	563.24	384.728	0.912768	0.3365	2.71253	0.00667714	0.0319147
ENSRNOG00000003977	DUSP1	chr10:16867369-16870162	1936	2509.65	1971.91	4233.84	4611.22	3278.08	0.911226	0.299181	3.04573	0.00232115	0.0134829
ENSRNOG00000006589	MIF	chr20:15885247-15886113	552	2337.21	1988.08	3432.64	5165.89	3174.2	0.910514	0.335504	2.71387	0.00665017	0.0318492
ENSRNOG00000046360	DACT3	chr1:80048065-80059888	2804	547.443	457.456	821.341	1176.68	737.453	0.910379	0.344542	2.64228	0.00823489	0.0381181
ENSRNOG00000008822	FKBP1A	chr3:153399454-153418856	1497	5604.56	6132.91	10275.3	12901.9	8585.98	0.909674	0.294192	3.09211	0.00198742	0.0118359
ENSRNOG00000021125	PRDX5	chr1:229155315-229158301	816	10558.5	10076.7	18092.2	22592	15076.8	0.909528	0.288016	3.15791	0.00158907	0.009867
ENSRNOG00000019496	STAT5A	chr10:88558935-88583261	3612	389.749	315.367	669.66	723.641	516.328	0.908814	0.324418	2.80137	0.00508864	0.0256937
ENSRNOG00000014268	ABCA2	chr3:2630277-2650182	8027	401.287	368.506	830.782	688.132	563.899	0.907291	0.325838	2.78449	0.00536126	0.0268284
ENSRNOG00000001158	ABCG1	chr20:11971327-12020646	3410	628.854	618.027	1319.18	1130.15	910.472	0.90421	0.306871	2.94655	0.00321343	0.0175779
ENSRNOG00000008117	GALNT11	chr4:6318188-6351691	2659	398.723	391.61	855.957	700.376	578.283	0.903202	0.325447	2.77527	0.00551561	0.0274184
ENSRNOG00000020358	PTOV1	chr1:101923969-101930515	1722	1964.13	1876.03	3137.46	4433.68	2804.03	0.902731	0.317027	2.84749	0.00440659	0.0229089
ENSRNOG00000009331	HCK	chr3:154982908-155025526	2054	1014.12	1062.78	2187.72	1881.96	1514.37	0.902175	0.299311	3.01417	0.0025768	0.0147143
ENSRNOG00000031824	SLC44A2	chr8:22422932-22439983	3354	1248.73	812.099	2121.64	1930.93	1504.85	0.89932	0.346594	2.59474	0.00946627	0.0427856
ENSRNOG00000013000	LDHB	chr4:240918027-240936001	1284	666.034	484.025	1059.88	1199.95	838.546	0.899014	0.330885	2.717	0.00658766	0.0316499
ENSRNOG00000000108	AGA	chr16:40992084-41003942	1182	753.856	834.048	1557.72	1547.68	1155.7	0.89875	0.294282	3.05404	0.00225783	0.0131876
ENSRNOG00000007519	TMEM43	chr4:187412092-187427232	2855	566.033	582.216	1221	1026.08	836.47	0.898414	0.31223	2.87741	0.00400953	0.0211926
ENSRNOG00000004148	CDK17	chr7:34066668-34144779	3670	279.491	287.643	588.47	524.058	413.557	0.897532	0.32709	2.74399	0.00606978	0.0295961
ENSRNOG00000046955	CBX6	chr7:121041260-121048988	3065	241.029	269.16	454.412	548.547	372.151	0.895725	0.337708	2.65236	0.00799303	0.0371876
ENSRNOG00000002244	PDGFRA	chr14:35356434-35409311	6514	1755.79	2204.1	4097.89	3628	2879.34	0.892718	0.310235	2.87756	0.00400767	0.0211926
ENSRNOG00000011700	PTPRM	chr9:114341759-115046974	5290	266.67	288.798	596.652	490.998	405.124	0.892237	0.34001	2.62415	0.0086865	0.0398447
ENSRNOG00000013946	RNF149	chr9:45974157-45998057	2290	1064.76	1443.99	2606.26	2292.14	1825.26	0.889588	0.328262	2.70999	0.00672844	0.0321144
ENSRNOG00000001687	CRYBG3	chr11:46134582-46196066	5196	247.439	302.66	580.288	494.671	400.441	0.888005	0.347335	2.55663	0.0105693	0.0468255
ENSRNOG00000006206	TMEM106B	chr4:39352536-39369348	1853	262.824	248.366	553.854	442.021	371.358	0.886401	0.34618	2.56052	0.0104515	0.0463914
ENSRNOG00000018468	LDB1	chr1:273215590-273223127	2284	1793.61	1509.83	2883.19	3531.27	2389.49	0.886176	0.301677	2.9375	0.00330873	0.0180315
ENSRNOG00000017883	CAMSAP1	chr3:8736052-8796109	6626	265.388	272.625	512.945	532.629	389.889	0.88498	0.321931	2.74897	0.00597821	0.0292518
ENSRNOG00000003243	WDR81	chr10:61988535-62001860	6830	703.855	582.216	1215.33	1272.19	928.417	0.881941	0.304834	2.89319	0.00381357	0.0203042
ENSRNOG00000000557	SAR1A	chr20:33095743-33108149	2625	3524.4	3630.77	6425.97	7372.32	5155.24	0.880343	0.279768	3.14669	0.00165129	0.0101624
ENSRNOG00000021218	PIAS3	chr2:218310300-218318466	2903	317.953	380.058	673.437	679.561	505.016	0.879907	0.323886	2.71672	0.00659331	0.0316666
ENSRNOG00000016386	PTMS	chr4:224453140-224457317	1126	5966.1	5680.07	8763.49	13905.9	8428.42	0.879334	0.33835	2.59889	0.00935255	0.0423496
ENSRNOG00000017069	MARK4	chr1:81601797-81633585	3208	300.004	318.833	609.24	587.728	447.187	0.878632	0.318861	2.75553	0.00585968	0.0287691
ENSRNOG00000009079	PRKAR2B	chr6:59936128-59968013	2835	391.672	340.781	748.962	666.092	529.014	0.877387	0.322347	2.72187	0.00649141	0.0313218
ENSRNOG00000018781	MAP1S	chr16:20126206-20136394	3189	359.62	324.609	668.401	653.848	494.085	0.87734	0.314894	2.78614	0.00533398	0.0267102
ENSRNOG00000016630	TLN1	chr5:63558229-63604807	8647	4378.9	4225.69	8040.33	8484.1	6184.81	0.876765	0.272768	3.21432	0.00130754	0.00835391
ENSRNOG00000004559	TUBA1A	chrX:115143854-115147552	1648	12665.5	12883.8	23363.8	25631.1	18345.2	0.874175	0.272418	3.20894	0.00133224	0.00848568
ENSRNOG00000015191	PHC1	chr4:222121224-222143340	3917	221.798	248.366	486.511	419.981	339.296	0.871462	0.343892	2.53412	0.0112731	0.0492844
ENSRNOG00000022597	CENPJ	chr15:40599808-40658983	4433	238.465	214.866	461.335	411.41	326.342	0.8696	0.339749	2.55953	0.0104813	0.0464924
ENSRNOG00000000568	SLC29A3	chr20:32099777-32135978	1807	291.029	251.832	516.092	526.507	390.353	0.868154	0.326855	2.65609	0.00790531	0.0368856
ENSRNOG00000045892	CFL2	chr6:85300271-85304317	2924	942.961	1248.76	1914.57	2300.71	1576.83	0.866511	0.324949	2.66661	0.00766208	0.0359001
ENSRNOG00000008498	GABARAPL1	chr4:211937459-211946619	1711	867.319	986.533	1818.28	1721.55	1328.62	0.864747	0.297564	2.90608	0.00365986	0.0195933
ENSRNOG00000002662	PBDC1	chrX:76840413-76845113	1629	741.676	592.613	1136.66	1421.57	957.387	0.86457	0.322423	2.68148	0.00732969	0.0345875
ENSRNOG00000023065	ZFP637	chr4:215807098-215812034	1124	482.057	469.008	828.264	991.792	681.613	0.86421	0.309565	2.79169	0.00524337	0.026338
ENSRNOG00000023455	POMGNT1	chr5:138791234-138801110	2712	755.779	909.135	1531.28	1651.76	1193.47	0.863549	0.304634	2.83471	0.00458672	0.0236596
ENSRNOG00000047896	KCTD10	chr12:49784214-49801889	2895	1346.81	1953.43	3077.04	3259.44	2372.89	0.863296	0.332787	2.59414	0.00948274	0.0428459
ENSRNOG00000024410	BLVRB	chr1:85468867-85491182	1137	484.622	469.008	823.858	1000.36	683.292	0.862484	0.311137	2.77204	0.00557056	0.0275914
ENSRNOG00000019380	CERS5	chrX:115891038-115929134	2655	769.241	873.324	1549.53	1580.74	1175.25	0.862355	0.296265	2.91076	0.00360555	0.0193451
ENSRNOG00000012764	AGAP3	chr4:7213696-7240039	4337	598.085	605.32	1100.79	1190.15	859.956	0.860777	0.295284	2.91508	0.00355602	0.0191287
ENSRNOG00000011541	CYGB	chr10:105280904-105290670	2111	1287.84	1081.26	2107.79	2390.1	1689.35	0.856751	0.297078	2.88393	0.00392746	0.0208268
ENSRNOG00000025602	CDK4	chr7:70527540-70533257	1206	2667.98	2603.8	4479.93	5524.65	3757.57	0.855667	0.289763	2.95299	0.00314712	0.0172866
ENSRNOG00000008937	CSRP1	chr13:57601913-57623352	1678	10168.7	10058.2	16538.2	21753.3	14389.4	0.850197	0.296999	2.86262	0.00420148	0.0219602
ENSRNOG00000046202	METRNL	chr10:110473810-110487800	1352	1236.55	1098.59	2072.55	2335	1659.34	0.848982	0.290548	2.92201	0.00347782	0.0188053
ENSRNOG00000001959	MX1	chr11:41398737-41420543	3106	269.875	252.987	446.23	547.322	372.867	0.848191	0.334906	2.53262	0.0113212	0.0494353
ENSRNOG00000017952	SEPT2	chr9:100277908-100433656	3191	4328.26	5065.51	9110.9	8583.28	6673.21	0.846929	0.289623	2.92425	0.00345285	0.018698
ENSRNOG00000019873	EML3	chr1:232066655-232120730	3188	839.754	784.375	1526.25	1526.87	1151.52	0.844858	0.289438	2.91896	0.00351204	0.0189481
ENSRNOG00000023910	MAN2B1	chr19:37172459-37191890	3137	3554.53	3241.47	6036.38	6730.71	4813.95	0.844563	0.279347	3.02335	0.00249995	0.0143599
ENSRNOG00000020843	FTL1	chr1:102527140-102528775	703	13027.7	13192.3	22063.5	27287.7	18589.6	0.84451	0.286127	2.95152	0.00316212	0.0173494
ENSRNOG00000015953	OAZ2	chr8:70899389-70913165	1808	1489.76	1442.83	2720.81	2773.34	2074.77	0.841047	0.279608	3.00795	0.00263017	0.0149371
ENSRNOG00000014363	ARHGEF3	chr16:2925677-2994155	3617	559.622	419.334	946.587	892.613	694.05	0.838935	0.329513	2.54598	0.010897	0.0479859
ENSRNOG00000006865	LAPTM4A	chr6:43822826-43841070	1695	8493.7	8598.09	15433.7	16509	12070.8	0.83836	0.271595	3.08681	0.0020232	0.0120244
ENSRNOG00000016256	MYO9B	chr16:19529580-19614175	6924	1623.1	1434.75	2638.99	3089.25	2161.46	0.838064	0.29175	2.87254	0.00407188	0.0214599
ENSRNOG00000004430	CEP131	chr10:108841398-108865764	3600	321.799	285.332	554.484	585.28	429.744	0.83631	0.321014	2.60521	0.00918172	0.0417578
ENSRNOG00000028198	SH2B3	chr12:42132946-42136714	3347	726.932	651.528	1463.94	1116.68	976.215	0.834638	0.327968	2.54488	0.0109316	0.0481223
ENSRNOG00000008452	EID1	chr3:124421963-124514515	1657	2046.82	2029.67	3678.1	3908.39	2871.15	0.831507	0.276966	3.0022	0.00268036	0.0151689
ENSRNOG00000008301	TAGLN2	chr13:95407051-95413998	1323	13393.8	13821.9	23071.8	27540	19149.9	0.828572	0.281504	2.94337	0.00324659	0.0177327
ENSRNOG00000020027	ARHGEF2	chr2:207396431-207423791	4182	1319.25	1374.68	2316.75	2696.2	1896.59	0.828471	0.288851	2.86816	0.00412869	0.0216982
ENSRNOG00000004273	IFITM1	chr1:220687944-220689004	570	2830.81	2479.04	4449.72	5419.35	3733.67	0.826459	0.293619	2.81473	0.00488179	0.02483
ENSRNOG00000016038	MGMT	chr1:216161434-216388310	802	420.518	361.575	677.213	781.189	551.353	0.825286	0.318749	2.58914	0.0096216	0.0433791
ENSRNOG00000037432	EXO5	chr5:143643133-143646451	2016	328.209	340.781	647.003	595.075	470.803	0.822368	0.318915	2.57864	0.00991891	0.0444854
ENSRNOG00000007036	TGFBR1	chr5:67575721-67639194	5637	822.446	987.688	1810.73	1546.46	1273.68	0.821588	0.315784	2.60174	0.00927525	0.0421042
ENSRNOG00000011501	ATP1B3	chr8:103638323-103669634	1818	2625.67	2557.59	4765.04	4792.44	3629.96	0.819447	0.275169	2.97797	0.00290163	0.0161637
ENSRNOG00000003226	MPRIP	chr10:45775201-45890063	3769	2553.24	3213.74	5587.01	5067.93	4047.27	0.817012	0.306511	2.66553	0.0076868	0.0360044
ENSRNOG00000048879	GM20721	chr3:178489203-178490283	324	1396.81	1431.28	2695	2510.09	1979	0.81602	0.285488	2.85834	0.00425868	0.0222193
ENSRNOG00000013442	CIZ1	chr3:16741660-16759602	2503	610.905	583.372	1004.49	1199.95	836.04	0.814789	0.304343	2.6772	0.00742395	0.0349304
ENSRNOG00000004711	MTA1	chr6:146918906-146944409	1337	768.6	815.565	1407.29	1496.26	1105.06	0.806646	0.29146	2.7676	0.00564703	0.0279132
ENSRNOG00000012865	PARP3	chr8:114537739-114543478	2092	575.648	706.977	1204	1147.29	895.425	0.803757	0.314405	2.55644	0.010575	0.0468368
ENSRNOG00000016315	CNPY3	chr9:15450329-15465055	1770	1192.32	978.447	1844.71	2117.05	1508.8	0.801017	0.302424	2.64865	0.00808132	0.0375145
ENSRNOG00000004873	PRKCH	chr6:105972485-106109232	2829	467.955	466.697	915.118	788.536	650.396	0.798278	0.314143	2.54113	0.0110495	0.0484668
ENSRNOG00000019406	ZFP61	chr1:82386241-82390511	1670	367.312	351.178	628.121	679.561	498.754	0.79605	0.311841	2.55274	0.0106879	0.0471933
ENSRNOG00000009414	CRELD1	chr4:208737582-208747189	1875	651.931	609.941	1064.28	1228.11	874.641	0.793231	0.300163	2.64266	0.00822568	0.0380875
ENSRNOG00000012616	PPT1	chr5:144329250-144350133	2262	3512.87	3613.44	6819.96	6054.83	4929.17	0.790623	0.284694	2.7771	0.0054847	0.0272885
ENSRNOG00000017977	SMPD1	chr1:177389587-177393430	2309	1548.74	1493.66	2446.4	3023.13	2094.38	0.778613	0.294479	2.64404	0.00819241	0.0379697
ENSRNOG00000017676	PLVAP	chr16:19767918-19780232	1945	3191.07	2859.1	4814.13	6058.5	4162.88	0.778402	0.29605	2.62929	0.00855633	0.0393932
ENSRNOG00000014079	STAT1	chr9:53998204-54038463	4085	1725.02	1895.67	3041.79	3441.88	2487.89	0.774773	0.28744	2.69543	0.00702988	0.0334074
ENSRNOG00000000024	HEBP1	chr4:233174077-233203299	1050	862.19	860.617	1475.9	1599.11	1181.39	0.770875	0.28851	2.67192	0.00754197	0.0354285
ENSRNOG00000000821	TUBB5	chr20:5519550-5523476	2171	13045	12788	22565.8	23205.5	17635.7	0.764113	0.269857	2.83155	0.0046323	0.0238188
ENSRNOG00000018993	ILK	chr1:177580200-177592280	1686	2428.24	2603.8	4385.52	4491.22	3426.29	0.756235	0.278796	2.7125	0.00667783	0.0319147
ENSRNOG00000042189	RAB31	chr9:112902312-113037023	3306	2380.16	2174.07	4270.34	3714.93	3090.56	0.748342	0.291564	2.56665	0.0102686	0.0457295
ENSRNOG00000011778	BLVRA	chr3:126078455-126103260	1153	707.701	667.7	1204	1202.39	931.637	0.742606	0.293182	2.53292	0.0113117	0.0494087
ENSRNOG00000021882	TMED9	chr17:11668170-11672682	1416	3845.56	4618.45	7025.77	7798.42	5735.74	0.742545	0.293002	2.53427	0.0112683	0.0492779
ENSRNOG00000003967	VMP1	chr10:76098588-76196545	1971	6284.05	6213.77	10555.3	11223.2	8441.66	0.739949	0.271789	2.72251	0.00647884	0.0312818
ENSRNOG00000013135	PTPN12	chr4:10623858-10695124	3167	1075.65	1033.9	1854.78	1819.51	1425.24	0.738328	0.285519	2.58592	0.00971197	0.0436953
ENSRNOG00000013987	SBNO2	chr7:12641926-12685802	4826	2198.1	2215.66	3931.74	3747.99	2980.2	0.737811	0.279388	2.64081	0.00827077	0.0382599
ENSRNOG00000009006	CCDC47	chr10:94139731-94158251	3258	2820.55	2973.46	1767.93	1825.63	2330.13	-0.713156	0.280458	-2.54283	0.0109958	0.0483409
ENSRNOG00000006975	WASL	chr4:51455977-51504468	4355	2157.08	2130.17	1324.22	1327.29	1721.94	-0.716652	0.281844	-2.54272	0.0109992	0.0483409
ENSRNOG00000036676	CSNK1D	chr10:109599918-109846748	1601	5237.89	4899.17	2812.7	3364.75	4047.11	-0.738014	0.286002	-2.58045	0.00986709	0.0442803
ENSRNOG00000006587	LOC100910833	chr6:141193722-141246255	2393	2337.85	2768.99	1512.4	1572.17	2033.95	-0.749396	0.294972	-2.54057	0.0110673	0.0485157
ENSRNOG00000016085	MPZL2	chr8:47959126-47980096	3255	1291.68	1273.02	713.087	833.84	1020.29	-0.751036	0.296976	-2.52894	0.0114408	0.0499274
ENSRNOG00000009552	SERINC3	chr3:166209488-166228921	2143	5485.97	5272.29	3194.1	3280.26	4277.03	-0.756092	0.27416	-2.75785	0.00581835	0.0286144
ENSRNOG00000008364	CAT	chr3:100021858-100053940	2436	3054.53	2905.31	1723.24	1856.24	2367.27	-0.758735	0.279626	-2.7134	0.00665975	0.0318492
ENSRNOG00000011587	ADCY6	chrX:114723349-114993826	5926	1832.07	2236.45	1179.46	1246.47	1612.51	-0.76664	0.302554	-2.53389	0.0112804	0.0493013
ENSRNOG00000050649	TVP23B	chr10:49077747-49089023	1652	1691.05	1673.87	949.105	1048.12	1330.83	-0.774599	0.287429	-2.69492	0.00704048	0.0334394
ENSRNOG00000004742	CHP1	chr3:117902987-117938471	2504	4905.83	4602.28	2525.7	3101.49	3754.95	-0.77891	0.289916	-2.68668	0.00721668	0.0341205
ENSRNOG00000005686	SUCLG2	chr4:192061200-192333899	2219	4401.98	5056.27	2682.42	2914.15	3737.96	-0.779537	0.287188	-2.71438	0.00664009	0.0318388
ENSRNOG00000016815	TMEM135	chr1:159198115-159407174	3395	895.524	964.585	507.91	587.728	734.015	-0.783136	0.306714	-2.55331	0.0106704	0.0471446
ENSRNOG00000020254	PER2	chr9:98231203-98273371	5760	1407.71	1524.85	776.655	948.937	1156.36	-0.785322	0.303631	-2.58644	0.00969733	0.0436664
ENSRNOG00000002667	LAMC2	chr13:75532725-75592335	5157	1389.76	1191	694.206	821.595	1016.38	-0.785953	0.306227	-2.56657	0.0102711	0.0457295
ENSRNOG00000012820	ADD3	chr1:281267468-281375203	4081	2885.29	2859.1	1615.62	1750.94	2261.63	-0.792943	0.279771	-2.83426	0.00459318	0.0236846
ENSRNOG00000020497	PLEKHA1	chr1:208462230-208513823	3653	1782.07	2011.19	1093.23	1124.03	1492.59	-0.795223	0.291973	-2.72362	0.00645716	0.0312213
ENSRNOG00000012508	SLC39A8	chr2:259585228-259647901	3071	1301.3	1440.52	810.012	784.862	1077.25	-0.800494	0.296707	-2.69793	0.00697727	0.0331933
ENSRNOG00000002705	VPS4B	chr13:31975736-32000936	2822	3766.07	3303.85	2011.5	2104.8	2776.5	-0.800666	0.283236	-2.82685	0.00470083	0.0240862
ENSRNOG00000000613	TFAM	chr20:20760386-20772300	1469	1668.61	1664.63	892.461	1048.12	1308.97	-0.801983	0.293251	-2.7348	0.00624172	0.0302976
ENSRNOG00000012184	URGCP	chr14:86649956-86683453	3444	1142.32	1117.07	605.464	705.274	885.801	-0.80551	0.299583	-2.68877	0.00717151	0.0339621
ENSRNOG00000025619	AP1G2	chr15:37646284-37653522	2358	1043.6	874.48	499.098	604.87	749.709	-0.812292	0.317795	-2.55603	0.0105874	0.0468776
ENSRNOG00000012297	MARCH8	chr4:214232833-214345405	4375	2257.72	2718.16	1337.43	1534.22	1948.73	-0.813095	0.302513	-2.6878	0.00719237	0.0340497
ENSRNOG00000009088	TXNRD1	chr7:27065819-27104095	3433	6081.49	4532.97	2719.55	3383.11	4145.78	-0.813253	0.318763	-2.55128	0.0107327	0.0473625
ENSRNOG00000023816	APH1A	chr2:217496481-217499990	2037	4541.72	5330.05	2639.62	3053.74	3865.35	-0.814872	0.294455	-2.76739	0.00565064	0.0279216
ENSRNOG00000017976	SLCO2B1	chr1:170827268-170863662	3789	1259.63	1036.21	638.191	680.785	897.097	-0.8156	0.30692	-2.65737	0.00787522	0.0367569
ENSRNOG00000024492	AP1AR	chr2:251491338-251523419	2374	1088.48	1212.95	695.465	622.013	898.965	-0.82056	0.307279	-2.67041	0.0075759	0.0355528
ENSRNOG00000015939	CCDC25	chr15:49038970-49070547	2143	918.601	895.273	526.791	510.589	708.249	-0.822187	0.300456	-2.73646	0.00621041	0.0301758
ENSRNOG00000002225	SCARB2	chr14:16980269-17031712	1983	1152.58	1432.44	692.318	779.965	1007.74	-0.829172	0.315163	-2.63093	0.0085151	0.0392406
ENSRNOG00000000924	SLC7A1	chr12:10169915-10192908	6463	697.445	696.58	361.893	431.001	542.871	-0.82988	0.315448	-2.6308	0.00851838	0.0392433
ENSRNOG00000008443	RGD1306151	chr4:233247178-233290087	4168	876.934	999.24	469.517	595.075	730.167	-0.832811	0.322166	-2.58504	0.00973672	0.0437799
ENSRNOG00000005323	AABR06044944.1	chr6:108493027-108565605	6338	1389.76	1392.01	791.76	789.76	1083.77	-0.833229	0.289454	-2.87862	0.00399419	0.0211422
ENSRNOG00000009110	PSEN1	chr6:118325067-118373047	2833	1596.82	1746.65	852.81	1046.89	1301.9	-0.834594	0.303261	-2.75207	0.00592207	0.02903
ENSRNOG00000008393	TAX1BP1	chr4:147442104-147499135	2896	9007.81	7344.71	4301.18	4976.1	6359.39	-0.83615	0.294431	-2.83988	0.004513	0.0233455
ENSRNOG00000006642	YIPF6	chrX:69500950-69510665	2385	945.525	1022.34	531.197	584.055	765.611	-0.837571	0.302249	-2.77113	0.00558617	0.0276593
ENSRNOG00000025910	HCCS	chrX:26698857-26708253	2398	745.522	723.15	407.209	423.654	571.098	-0.837985	0.305769	-2.74058	0.006133	0.0298395
ENSRNOG00000047213	GNPDA1	chr18:31157708-31166267	2037	2760.29	3011.58	1672.26	1596.66	2246.07	-0.839466	0.286288	-2.93224	0.00336525	0.0183053
ENSRNOG00000022402	LUZP1	chr5:158664308-158673014	7216	2498.11	2804.8	1227.92	1764.41	2058.76	-0.841637	0.327352	-2.57105	0.0101392	0.0453199
ENSRNOG00000033235	RELB	chr1:81783431-81810721	1668	1163.48	961.119	531.197	664.868	823.668	-0.842536	0.321268	-2.62253	0.00872792	0.0400062
ENSRNOG00000010728	STRADB	chr9:65570180-65589257	2351	682.06	717.374	351.823	435.899	542.922	-0.843191	0.321581	-2.62202	0.00874105	0.0400411
ENSRNOG00000049244	SEPSECS	chr14:60774967-60804615	3534	672.444	708.132	358.117	418.756	535.557	-0.844263	0.315884	-2.6727	0.00752438	0.0353687
ENSRNOG00000013583	TBC1D8	chr9:45774872-45893709	4093	573.725	612.251	329.166	337.944	460.252	-0.844595	0.316205	-2.67103	0.00756178	0.0354987
ENSRNOG00000024629	HADHA	chr6:37400510-37439591	2510	7363.56	5535.68	3318.09	3936.56	4999.87	-0.845078	0.311388	-2.71391	0.00664943	0.0318492
ENSRNOG00000011839	MRPS31	chr16:74102246-74133103	1361	1351.3	1159.81	619.31	793.433	973.313	-0.845674	0.316995	-2.66778	0.00763532	0.0357863
ENSRNOG00000003296	DCK	chr14:20843807-20863311	3151	760.907	710.443	435.531	389.37	570.313	-0.846641	0.314719	-2.69015	0.00714203	0.0338555
ENSRNOG00000014719	SNX19	chr8:31526776-31563215	5509	1217.96	1242.99	646.373	739.558	955.139	-0.846998	0.296901	-2.85279	0.00433369	0.0225633
ENSRNOG00000030294	EML4	chr6:6573578-6629032	4837	3191.71	3421.68	1683.59	2044.81	2567.89	-0.847037	0.292918	-2.89172	0.00383144	0.020377
ENSRNOG00000006941	THUMPD3	chr4:208284224-208307188	1957	771.805	814.41	455.042	434.674	615.101	-0.848544	0.307342	-2.76091	0.00576413	0.0283957
ENSRNOG00000002615	PMM2	chr10:5857623-5878777	1841	4555.83	4009.67	2082.62	2725.59	3318.46	-0.850542	0.305137	-2.7874	0.00531321	0.0266429
ENSRNOG00000014617	TGOLN2	chr4:165245798-165253551	4717	3426.97	4614.99	2450.81	2041.13	3116.88	-0.850675	0.329398	-2.58252	0.0098083	0.0440436
ENSRNOG00000030683	VPS26A	chr20:33874999-33903564	1259	1024.37	1209.49	605.464	646.501	865.76	-0.851337	0.307988	-2.76418	0.00570653	0.0281691
ENSRNOG00000014598	ABHD13	chr16:84754317-84769135	5267	1350.66	1344.64	677.842	835.064	1044.78	-0.851453	0.302993	-2.81014	0.004952	0.0251257
ENSRNOG00000029572	APEH	chr8:116216747-116225863	2364	3205.81	2890.29	1441.91	1972.56	2359.68	-0.852519	0.313719	-2.71746	0.00657855	0.031627
ENSRNOG00000012325	ADK	chr15:3011935-3414198	1736	2299.39	2671.96	1260.65	1526.87	1926.83	-0.85297	0.303225	-2.81299	0.00490825	0.0249384
ENSRNOG00000018158	TMEM181	chr1:48465873-48505759	1854	1044.89	1105.52	497.21	704.05	831.914	-0.85459	0.332683	-2.56878	0.0102058	0.0455336
ENSRNOG00000017155	NCK2	chr9:49915382-50040941	2550	1048.73	1218.73	601.058	667.317	878.328	-0.855773	0.307114	-2.7865	0.0053281	0.02669
ENSRNOG00000019630	HACL1	chr16:7646579-7682624	2002	637.829	621.493	330.424	372.228	486.876	-0.857305	0.314618	-2.72491	0.00643187	0.0311169
ENSRNOG00000008713	SLC41A2	chr7:26651681-26734269	4470	844.883	705.822	473.294	385.697	598.649	-0.859111	0.332951	-2.58029	0.00987166	0.0442872
ENSRNOG00000011849	NDUFS1	chr9:69728735-69762079	2674	4450.7	4261.5	2143.04	2720.69	3369.69	-0.860371	0.295206	-2.91448	0.00356283	0.0191512
ENSRNOG00000004494	LTA4H	chr7:34353505-34385290	2019	8559.72	7403.62	3520.75	5347.1	6158.93	-0.86122	0.333456	-2.58271	0.0098028	0.0440325
ENSRNOG00000003163	SDHC	chr13:94125548-94146440	1148	8809.09	8221.5	3759.29	5708.31	6573.37	-0.861552	0.329304	-2.61628	0.00888938	0.040629
ENSRNOG00000011317	PKN2	chr2:267265824-267370861	5592	2400.03	2368.14	1147.99	1506.05	1842.1	-0.863091	0.305297	-2.82706	0.00469779	0.024079
ENSRNOG00000018114	ACADVL	chr10:56364441-56369608	2121	3448.76	2660.41	1536.32	1850.12	2355.73	-0.86551	0.312502	-2.76961	0.00561228	0.0277509
ENSRNOG00000014654	LOC691807	chr2:246456866-246458626	1080	4214.16	3534.88	1803.17	2475.81	2983.88	-0.871271	0.318817	-2.73282	0.00627938	0.0304601
ENSRNOG00000023874	TMEM62	chr3:119459036-119493418	2802	954.499	1013.1	478.958	607.319	757.989	-0.872471	0.315895	-2.76191	0.00574651	0.0283425
ENSRNOG00000015753	EPN1	chr1:76226166-76242237	2031	6620.6	6151.39	2937.32	4106.75	4917	-0.874929	0.312669	-2.79826	0.00513787	0.0259129
ENSRNOG00000000558	PPA1	chr20:32841630-33089923	1348	4414.16	4321.57	1836.53	2963.13	3358.08	-0.875355	0.344388	-2.54177	0.0110294	0.0483933
ENSRNOG00000015150	SPG7	chr19:66586318-66618933	2479	1260.27	1107.83	568.33	734.661	910.961	-0.876034	0.317686	-2.75755	0.00582366	0.0286212
ENSRNOG00000012999	PHB2	chr4:224248363-224252647	1027	3312.22	3660.8	1980.03	1861.14	2687.24	-0.878206	0.287237	-3.05742	0.0022325	0.0130448
ENSRNOG00000001380	TPCN1	chr12:43398892-43421373	4037	3310.94	2611.89	1423.66	1823.18	2275.04	-0.880757	0.31684	-2.77982	0.00543895	0.0271333
ENSRNOG00000015733	MYL12B	chr9:118761459-118775834	1192	12329	10953.5	4890.28	7842.5	8933.01	-0.881712	0.342971	-2.57081	0.0101461	0.0453371
ENSRNOG00000019883	PAK4	chr1:86408070-86417580	2678	926.294	1037.36	471.406	604.87	754.628	-0.881764	0.321895	-2.73929	0.00615715	0.029947
ENSRNOG00000004132	LASP1	chr10:85533430-85573897	3400	11877.1	11468.7	5863.3	6975.6	8983.42	-0.883182	0.281461	-3.13785	0.00170191	0.0104036
ENSRNOG00000042094	PRR13	chr7:141857063-141860364	771	4622.49	4159.84	2351.99	2470.91	3378.13	-0.883777	0.279471	-3.16232	0.00156515	0.00975627
ENSRNOG00000010029	UBALD2	chr10:105054509-105058301	492	803.856	969.205	512.945	454.265	681.18	-0.884972	0.324192	-2.72978	0.00633768	0.0307122
ENSRNOG00000018553	PITPNM1	chr1:226219371-226240238	4165	1893.61	2019.27	961.063	1179.13	1503.06	-0.888608	0.299362	-2.96834	0.00299412	0.0166217
ENSRNOG00000001585	NRIP1	chr11:18314225-18397564	7910	1392.33	1412.8	625.604	902.408	1075.42	-0.889347	0.330254	-2.69292	0.00708301	0.0335976
ENSRNOG00000030225	CLPX	chr8:70480809-70535360	2390	1324.38	1340.02	713.717	740.783	1023.13	-0.890115	0.290438	-3.06473	0.00217865	0.0127712
ENSRNOG00000023210	TRAPPC10	chr20:13338327-13398188	6601	1673.1	1896.82	967.986	979.547	1371.12	-0.891161	0.293952	-3.03166	0.00243215	0.0140369
ENSRNOG00000017077	SNX7	chr2:239065718-239150147	1752	1310.91	1739.72	864.768	792.209	1170.65	-0.891253	0.326371	-2.7308	0.00631816	0.030638
ENSRNOG00000033693	NAIP6	chr2:49536672-49572335	5506	994.884	1118.23	494.063	656.297	810.231	-0.891255	0.325746	-2.73604	0.00621835	0.0301942
ENSRNOG00000015911	LRP5	chr1:225689355-225793030	5083	1708.36	2221.43	867.915	1263.62	1505.24	-0.892025	0.349419	-2.55288	0.0106835	0.0471882
ENSRNOG00000021118	NOMO1	chr1:103100472-103152080	4201	3664.15	3472.5	1773.59	2121.94	2738.81	-0.892193	0.287931	-3.09863	0.00194416	0.0116354
ENSRNOG00000019983	MLX	chr10:88795894-88803709	1929	2654.52	2753.98	1329.25	1619.93	2075.36	-0.893846	0.293389	-3.04663	0.00231425	0.0134578
ENSRNOG00000015268	PPAPDC2	chr1:254286409-254327754	2850	1308.99	1352.73	600.428	843.635	1019.22	-0.895787	0.326811	-2.741	0.00612531	0.029812
ENSRNOG00000001773	SENP2	chr11:85718645-85755312	4356	1409.63	1463.63	701.129	860.777	1101.5	-0.896555	0.302789	-2.96099	0.00306653	0.0169134
ENSRNOG00000001455	KIF13A	chr17:19600216-19782859	6733	775.01	1018.88	509.168	460.387	687.056	-0.896698	0.335837	-2.67004	0.00758429	0.0355585
ENSRNOG00000020544	SDR39U1	chr15:38452083-38455017	1465	756.42	732.391	387.698	418.756	569.965	-0.897087	0.306792	-2.92409	0.00345464	0.0187008
ENSRNOG00000005849	ACO1	chr5:60972003-61027705	3422	3461.58	3889.53	1880.59	2103.58	2816.38	-0.902573	0.287998	-3.13396	0.00172466	0.0105176
ENSRNOG00000017012	COQ7	chr1:195121559-195137541	2051	691.675	597.234	303.361	390.595	492.137	-0.902632	0.33488	-2.69539	0.00703063	0.0334074
ENSRNOG00000000975	MCOLN1	chr12:4216867-4230870	2070	1507.07	1106.67	584.694	816.698	996.109	-0.904582	0.349933	-2.58501	0.00973754	0.0437799
ENSRNOG00000013816	CMAS	chr4:241203360-241221675	1691	3428.89	3757.84	1596.74	2272.55	2745.11	-0.907582	0.321685	-2.82134	0.00478238	0.0244438
ENSRNOG00000017202	MYZAP	chr8:74980450-75067085	2189	1058.35	772.823	457.559	520.385	697.101	-0.911586	0.334873	-2.72218	0.0064852	0.0313022
ENSRNOG00000012911	ERLIN1	chr1:271255432-271290754	3129	1934.64	2133.64	932.112	1252.6	1552.95	-0.912015	0.316113	-2.88509	0.00391302	0.0207654
ENSRNOG00000004512	APOOL	chrX:83639375-83708626	1347	1339.12	1005.02	514.833	734.661	891.474	-0.912343	0.352057	-2.59146	0.00955699	0.0431285
ENSRNOG00000005981	NT5C3A	chr4:151889318-151932147	1636	1686.56	1813.65	712.458	1157.09	1332.8	-0.913414	0.35477	-2.57467	0.0100337	0.0449448
ENSRNOG00000007304	HERC3	chr4:153899766-153990202	5230	388.466	450.525	225.318	221.623	319.64	-0.914743	0.341328	-2.67995	0.00736321	0.0346895
ENSRNOG00000002755	PAFAH1B1	chr10:61186183-61299247	4363	7641.76	6471.38	3236.27	4324.7	5378.47	-0.914957	0.310315	-2.94848	0.00319337	0.0175011
ENSRNOG00000000921	UBL3	chr12:9953321-9997647	2695	3371.84	3793.65	1754.08	2090.11	2734.92	-0.916629	0.294438	-3.11315	0.00185102	0.0111605
ENSRNOG00000013764	FAM118A	chr7:125652050-125678576	2444	650.008	760.116	395.88	355.086	537.263	-0.917598	0.325938	-2.81525	0.00487391	0.0247986
ENSRNOG00000048843	TSFM	chr7:70489451-70495163	576	348.722	402.007	207.695	189.787	285.647	-0.919279	0.350225	-2.62482	0.0086695	0.0398135
ENSRNOG00000014166	SMOC2	chr1:57434173-57565314	2691	1504.51	1903.75	820.711	997.914	1299.02	-0.919633	0.320758	-2.86706	0.00414305	0.0217563
ENSRNOG00000013656	LPAR1	chr5:79707134-79824358	3294	1272.45	949.567	483.364	694.254	843.12	-0.921022	0.354844	-2.59557	0.00944339	0.0427078
ENSRNOG00000000800	MAN1A1	chr20:37015822-37203609	3857	1118.6	1442.83	754.627	601.197	974.655	-0.92266	0.339781	-2.71546	0.00661842	0.0317662
ENSRNOG00000016849	PPP2R5D	chr9:15493417-15518751	2869	2805.8	3207.97	1465.2	1742.37	2290.72	-0.92442	0.297424	-3.10808	0.00188304	0.0113348
ENSRNOG00000005587	SUCLG1	chr4:165937917-165967275	1244	10811.7	8444.45	3993.42	6201.76	7304.78	-0.924487	0.34746	-2.6607	0.00779784	0.0364074
ENSRNOG00000010170	TUBB4B	chr3:2413972-2425633	1551	13459.1	8809.49	4770.7	6974.38	8434.03	-0.924632	0.362525	-2.55054	0.0107557	0.0474353
ENSRNOG00000001303	SPECC1L	chr20:16472452-16577173	4289	493.596	705.822	327.278	304.884	455.688	-0.926615	0.361036	-2.56655	0.0102716	0.0457295
ENSRNOG00000024040	MB21D2	chr11:78476277-78575233	3071	791.677	762.426	337.977	483.652	589.758	-0.927377	0.341283	-2.71732	0.00658126	0.0316295
ENSRNOG00000014525	HSPD1	chr9:61361745-61372172	2227	9859.74	10849.6	5161.54	5861.37	7883.5	-0.929236	0.282137	-3.29356	0.000989263	0.00663777
ENSRNOG00000012786	PGRMC1	chrX:123352161-123360154	1822	5006.47	4820.61	2377.17	2838.24	3735.25	-0.932612	0.285252	-3.26943	0.00107763	0.00711599
ENSRNOG00000000546	NT5DC1	chr20:42836805-42938666	2721	621.803	756.65	392.733	331.822	523.267	-0.93262	0.338184	-2.75773	0.00582036	0.0286147
ENSRNOG00000010023	SLC33A1	chr2:173903963-173926796	1970	1798.1	1590.7	830.782	957.508	1285.69	-0.937074	0.296483	-3.16063	0.00157428	0.00980253
ENSRNOG00000012966	ACADL	chr9:73434320-73472895	1502	5948.79	4699.32	2341.92	3245.98	4028.52	-0.940456	0.326141	-2.88358	0.00393178	0.0208421
ENSRNOG00000026542	SUCO	chr13:84629764-84694844	3928	685.906	530.233	338.606	295.089	459.55	-0.940857	0.343566	-2.73851	0.00617187	0.0300061
ENSRNOG00000026319	AKAP9	chr4:27098571-27234808	12068	1589.12	1581.46	811.271	858.328	1202.15	-0.942248	0.287423	-3.27827	0.00104446	0.00693151
ENSRNOG00000012443	CPT2	chr5:131353541-131370821	2296	1465.4	1002.71	561.407	723.641	931.08	-0.943918	0.352362	-2.67883	0.00738789	0.0347833
ENSRNOG00000009373	LOC102547099	chr8:33096206-33097816	1563	1819.25	1513.3	747.074	995.465	1259.3	-0.946404	0.322329	-2.93615	0.00332318	0.0180967
ENSRNOG00000000503	PPARD	chr20:10018463-10083772	3262	2062.21	1986.93	914.489	1204.84	1531.42	-0.948614	0.308401	-3.07591	0.00209863	0.0123873
ENSRNOG00000036683	SIRT7	chr10:109389097-109395794	1717	2391.7	1834.44	860.362	1329.74	1591.56	-0.951869	0.356196	-2.67231	0.00753303	0.0353979
ENSRNOG00000021168	ANP32E	chr2:217530774-217545154	1373	2137.21	2169.45	1122.81	1127.7	1629.33	-0.952648	0.2831	-3.36505	0.000765289	0.00535947
ENSRNOG00000009971	PLEKHA8	chr4:149430314-149480827	6657	949.371	1044.29	474.552	564.464	753.271	-0.953215	0.310415	-3.07078	0.00213504	0.012556
ENSRNOG00000018267	B3GNT7	chr9:93055877-93059828	2530	717.958	831.738	363.782	442.021	585.382	-0.954159	0.324852	-2.93721	0.00331181	0.0180416
ENSRNOG00000005877	LRPPRC	chr6:7919928-8001949	4309	1650.66	2008.88	958.546	941.59	1382.62	-0.958216	0.304732	-3.14445	0.00166398	0.0102146
ENSRNOG00000009712	GALE	chr5:158075303-158079806	1393	2944.27	3581.09	1374.57	2005.62	2460.56	-0.95851	0.337039	-2.84391	0.00445635	0.0231181
ENSRNOG00000004060	CALM2	chr6:133444273-133454391	3515	58152.7	57317.1	24187.7	35493.9	43482.7	-0.965066	0.31874	-3.02775	0.00246383	0.0141984
ENSRNOG00000012439	BID	chr4:220531876-220554316	1992	1945.54	2104.76	951.622	1142.4	1526.65	-0.967834	0.297307	-3.25534	0.00113258	0.00742163
ENSRNOG00000016911	TMBIM6	chrX:115538426-115573914	989	12968.1	12171.1	5094.2	7843.73	9450.88	-0.968368	0.331518	-2.92101	0.00348898	0.0188516
ENSRNOG00000029784	PAK1	chr1:168974733-169089649	2529	2327.59	2323.09	986.238	1408.1	1749.19	-0.969806	0.322247	-3.00951	0.00261668	0.0148779
ENSRNOG00000032908	ACAA1A	chr8:127234653-127242997	1367	1428.86	1308.83	672.807	738.334	1030.57	-0.970931	0.294068	-3.30172	0.000960946	0.0064776
ENSRNOG00000002536	C1GALT1C1	chrX:125006188-125010692	1373	1051.94	889.497	483.364	514.262	729.689	-0.971869	0.30837	-3.15163	0.0016236	0.0100216
ENSRNOG00000002767	DLG3	chrX:71468332-71520289	3748	1782.71	1703.91	642.597	1135.05	1306.53	-0.972631	0.371774	-2.61619	0.0088917	0.040629
ENSRNOG00000001091	HIP1R	chr12:39895515-39924082	4340	1963.49	1513.3	702.388	1071.38	1302.27	-0.973947	0.355064	-2.74302	0.00608767	0.0296586
ENSRNOG00000013167	HMGB2	chr16:35886763-35889338	1152	6700.09	4924.58	2888.85	3068.43	4365.24	-0.974143	0.309729	-3.14515	0.00166003	0.0102032
ENSRNOG00000009985	TDRD7	chr5:66079897-66147306	3787	1851.95	1911.84	859.104	1076.28	1415.58	-0.974832	0.30158	-3.23241	0.0012275	0.00793654
ENSRNOG00000013264	PDE12	chr16:2332373-2343389	2421	262.183	289.953	145.387	134.688	206.867	-0.975694	0.366662	-2.66102	0.00779039	0.036396
ENSRNOG00000042603	TTC39B	chr5:105326436-105422721	2676	587.187	674.632	239.164	400.39	472.052	-0.979287	0.383905	-2.55086	0.0107458	0.0474059
ENSRNOG00000005424	ODC1	chr6:52565187-52571771	2489	5468.02	4963.86	2372.13	2975.38	3918.12	-0.979715	0.29477	-3.32366	0.000888432	0.00605889
ENSRNOG00000015895	B4GALT6	chr18:15258329-15300179	4768	3187.86	2752.82	1457.64	1585.64	2231.58	-0.9798	0.288177	-3.39999	0.000673877	0.00480253
ENSRNOG00000027623	LOC680039	chr14:78899824-78964642	6715	2045.54	1392.01	711.199	1027.3	1284	-0.982806	0.364097	-2.6993	0.00694855	0.0330675
ENSRNOG00000002652	RAP1GAP2	chr10:60909165-60963561	3803	485.904	641.131	271.892	297.538	421.972	-0.987002	0.34776	-2.83817	0.00453728	0.0234378
ENSRNOG00000019000	LIMK2	chr14:84262199-84330097	3393	1472.45	1921.08	750.85	969.752	1271.07	-0.988106	0.333506	-2.96279	0.00304867	0.0168347
ENSRNOG00000017791	ARHGAP12	chr17:51975228-52089012	4891	951.935	880.256	434.902	495.896	686.318	-0.988504	0.30588	-3.23167	0.0012307	0.00795369
ENSRNOG00000023628	TMEM106A	chr10:89282481-89291487	2376	3478.25	2433.99	1156.8	1818.28	2204.37	-0.988825	0.368939	-2.68019	0.00735814	0.0346824
ENSRNOG00000000095	GPR89B	chr2:218485503-218523850	1786	1541.05	1684.27	607.352	1012.61	1203.02	-0.995866	0.362499	-2.74722	0.00601023	0.0293598
ENSRNOG00000017663	DOLPP1	chr3:14310906-14319391	2146	1065.4	1078.95	385.181	686.908	798.284	-0.997455	0.380791	-2.61943	0.0088077	0.0403207
ENSRNOG00000010636	COA7	chr5:131772050-131782841	2787	385.902	398.541	176.856	216.725	292.918	-0.997641	0.346674	-2.87775	0.00400519	0.0211926
ENSRNOG00000042411	RPS6KA1	chr5:155760611-155805563	3117	5578.92	5415.54	1874.92	3619.43	4091.8	-0.99777	0.3849	-2.59228	0.00953408	0.043063
ENSRNOG00000002840	ATP5B	chr7:2484094-2490338	1759	75735.6	72138.2	28568.8	45807.3	55169.5	-0.999	0.339017	-2.94675	0.0032113	0.0175779
ENSRNOG00000047605	PTPRK	chr1:18602549-18714240	3237	756.42	1017.72	467	422.43	662.561	-0.999639	0.341151	-2.93019	0.00338752	0.0183784
ENSRNOG00000017965	AFG3L2	chr18:62325696-62369789	3074	3401.97	3351.21	1479.04	1928.48	2523.43	-1.00131	0.301461	-3.32153	0.000895264	0.00609977
ENSRNOG00000028353	SOX13	chr13:55487560-55532516	3563	1608.99	1409.33	592.876	918.326	1124.12	-1.00228	0.348	-2.8801	0.00397552	0.0210587
ENSRNOG00000007732	SLC35C1	chr3:88065145-88071681	3027	1396.81	1739.72	765.955	810.575	1172.14	-1.00349	0.31065	-3.2303	0.00123659	0.00798819
ENSRNOG00000033740	LURAP1L	chr5:102512704-102558783	1146	711.548	658.459	270.633	412.634	509.914	-1.00354	0.358291	-2.8009	0.005096	0.0257219
ENSRNOG00000049906	FOXF1	chr19:63756661-63760416	2456	620.521	681.563	310.284	344.066	486.402	-1.0037	0.318549	-3.15084	0.00162799	0.0100402
ENSRNOG00000009085	PRKAG2	chr4:6770352-6816799	2215	1096.17	971.516	446.23	590.177	770.736	-1.00569	0.324143	-3.1026	0.00191826	0.0115088
ENSRNOG00000013587	FAM135A	chr9:29080801-29160296	5401	418.595	499.043	237.906	219.174	341.995	-1.0076	0.344276	-2.92671	0.00342569	0.0185716
ENSRNOG00000010353	DNAJB6	chr4:2761868-2825295	2449	1457.71	1561.82	798.683	710.172	1126.22	-1.01157	0.300634	-3.36479	0.000766006	0.00535947
ENSRNOG00000012862	SPSB4	chr8:104287498-104359356	2774	195.515	209.09	89.372	110.199	150.092	-1.01332	0.396488	-2.55573	0.0105965	0.0468891
ENSRNOG00000002478	INSIG2	chr13:42366078-42388541	2449	724.368	671.166	335.46	359.984	519.293	-1.01442	0.311531	-3.25625	0.00112896	0.00740703
ENSRNOG00000010922	PPP2R1B	chr8:53876376-53897403	3168	2076.31	2077.03	954.14	1121.58	1547.63	-1.01542	0.29115	-3.48762	0.000487345	0.00368213
ENSRNOG00000008626	MANEA	chr5:45469289-45491135	4344	878.216	743.943	431.755	372.228	602.977	-1.01594	0.324316	-3.13256	0.00173288	0.0105575
ENSRNOG00000010086	PLAGL2	chr3:155374855-155388034	3502	760.266	767.047	328.536	428.552	567.623	-1.01846	0.326296	-3.12126	0.00180079	0.0108801
ENSRNOG00000021013	STX3	chr1:235218150-235262711	2631	1358.99	1209.49	555.113	721.192	954.583	-1.01867	0.316625	-3.21727	0.00129418	0.0082831
ENSRNOG00000026517	VRK3	chr1:101820325-101847648	1726	2972.47	3179.09	1166.24	1878.28	2283.43	-1.01988	0.347932	-2.93126	0.00337589	0.0183281
ENSRNOG00000006067	AIFM1	chrX:135375532-135414546	2103	3281.45	2995.41	1319.81	1792.57	2331.52	-1.02283	0.311754	-3.28089	0.00103481	0.00687685
ENSRNOG00000014382	C2CD5	chr4:241450857-241536419	4362	1142.96	1103.21	437.419	667.317	831.836	-1.02855	0.346219	-2.9708	0.00297025	0.0165207
ENSRNOG00000005437	HRSP12	chr7:73422766-73436388	912	1541.05	1364.28	514.833	903.632	1073.16	-1.0303	0.375063	-2.747	0.00601438	0.0293703
ENSRNOG00000016356	GOT1	chr1:270691431-270714931	1963	4916.09	4493.69	1660.93	2933.74	3476.1	-1.03349	0.366333	-2.82118	0.0047847	0.0244471
ENSRNOG00000007023	GALM	chr6:2785888-2837634	2164	2061.56	1703.91	679.101	1153.42	1389.24	-1.03699	0.369161	-2.80903	0.00496903	0.0252033
ENSRNOG00000016219	VNN1	chr1:24089367-24099667	2349	719.881	511.75	297.067	302.435	454.757	-1.03713	0.349949	-2.96366	0.00304008	0.0168157
ENSRNOG00000020441	WNK4	chr10:88965630-89008424	4043	245.004	300.35	119.916	144.483	201.141	-1.03775	0.381607	-2.71943	0.00653953	0.0314706
ENSRNOG00000021316	TMEM98	chr10:67842259-67853166	1408	2628.24	2264.17	920.153	1465.65	1806.58	-1.03817	0.35011	-2.96527	0.00302418	0.0167567
ENSRNOG00000008064	NAGA	chr7:123547944-123556139	1758	4409.03	3309.62	1607.44	2157.45	2850.46	-1.04117	0.329988	-3.15519	0.00160396	0.00993828
ENSRNOG00000009652	PRKCI	chr2:135636955-135697732	4501	1312.84	1651.92	672.178	777.516	1097.8	-1.04128	0.317933	-3.27515	0.00105605	0.00699889
ENSRNOG00000032398	RGD1562136	chr9:110878883-110898591	2730	2583.37	2497.52	1035.33	1447.28	1878.44	-1.04349	0.317335	-3.2883	0.00100795	0.00672905
ENSRNOG00000007775	CMPK1	chr5:137551829-137578247	1844	7198.17	7367.81	3561.03	3576.57	5395.56	-1.04532	0.273933	-3.81595	0.00013566	0.00125391
ENSRNOG00000011511	STK24	chr15:110022516-110073160	2231	2696.83	2966.53	1279.53	1490.14	2096.36	-1.0464	0.291838	-3.58555	0.000336364	0.00269814
ENSRNOG00000007081	XDH	chr6:34996982-35059195	4200	7370.61	10075.6	4685.73	3770.03	6448.15	-1.04669	0.333894	-3.13479	0.00171977	0.0104951
ENSRNOG00000020703	SIPA1L3	chr1:88439886-88477653	3625	1492.97	1405.87	538.749	862.002	1067.68	-1.05071	0.352564	-2.98021	0.00288049	0.0160679
ENSRNOG00000004951	KIF16B	chr3:143103728-143381497	5405	545.52	616.872	297.697	264.478	429.109	-1.05134	0.331843	-3.16818	0.00153395	0.0096147
ENSRNOG00000000552	COL13A1	chr20:33254961-33395041	3146	248.08	195.227	86.2251	123.668	162.12	-1.05545	0.417183	-2.52995	0.0114079	0.049799
ENSRNOG00000017820	NQO2	chr17:34023305-34051486	1203	365.389	447.059	196.996	193.461	299.013	-1.056	0.351832	-3.00145	0.00268698	0.0152005
ENSRNOG00000016346	PRKCD	chr16:6588978-6608725	2716	3303.89	3060.1	1414.85	1671.35	2347.89	-1.05821	0.288653	-3.66604	0.000246336	0.00207061
ENSRNOG00000021323	CAR13	chr2:108055052-108086130	1982	269.234	341.937	174.338	113.872	223.893	-1.05865	0.416458	-2.54204	0.0110207	0.0483698
ENSRNOG00000010777	TOX	chr5:24669151-24965951	3093	289.747	311.902	132.17	155.503	221.231	-1.05949	0.362826	-2.92012	0.00349901	0.0188988
ENSRNOG00000011922	STT3B	chr8:122604521-122668755	2703	2192.34	2728.56	1158.06	1213.41	1813.73	-1.06406	0.30473	-3.49181	0.000479762	0.00363049
ENSRNOG00000011704	FBXO34	chr15:28202791-28270018	2840	1150.66	1013.1	468.259	573.035	796.161	-1.06408	0.31283	-3.40145	0.000670301	0.00478406
ENSRNOG00000011507	PICK1	chr7:120459070-120478332	1706	477.57	447.059	191.332	251.009	339.594	-1.06557	0.347812	-3.06364	0.00218662	0.0128024
ENSRNOG00000002185	PGM2	chr14:45635118-45669788	2103	4314.16	4360.85	1613.73	2535.8	3185.36	-1.06867	0.338881	-3.15352	0.00161315	0.0099794
ENSRNOG00000032396	RGD1559575	chr10:34016733-34026889	2535	863.473	1179.45	558.889	406.512	749.079	-1.07041	0.366929	-2.91722	0.00353165	0.0190398
ENSRNOG00000008057	KRT7	chr7:140862268-140876993	1374	653.213	970.361	383.922	385.697	595.6	-1.07232	0.35886	-2.98812	0.00280701	0.015745
ENSRNOG00000007743	MGST1	chr4:236372196-236387443	920	9812.95	8653.54	3321.24	5468.32	6766.7	-1.07264	0.349825	-3.06621	0.0021679	0.0127236
ENSRNOG00000001762	PCYT1A	chr11:74632946-74676225	4300	1814.77	2177.54	1041.62	854.655	1465.84	-1.07761	0.319346	-3.37443	0.000739682	0.00519554
ENSRNOG00000004685	MTA3	chr6:6899430-6981336	1734	700.009	679.252	330.424	325.699	505.94	-1.07845	0.311252	-3.46489	0.000530448	0.00394438
ENSRNOG00000008289	SLC25A3	chr7:31904033-31911476	1327	30286.9	24895.5	9728.96	16367	20174.9	-1.079	0.358199	-3.01229	0.00259284	0.0147798
ENSRNOG00000019926	RAMP1	chr9:97995668-98041718	808	1684.64	1820.58	641.968	1018.73	1283.62	-1.0795	0.350308	-3.08158	0.00205905	0.0121977
ENSRNOG00000015840	HSD17B4	chr18:44032346-44119545	2584	4405.18	3209.12	1665.34	1949.3	2788.32	-1.07986	0.319058	-3.38452	0.000713028	0.00504968
ENSRNOG00000002759	LIAS	chr14:44326598-44343665	1586	716.676	572.975	255.528	352.637	471.544	-1.08032	0.353967	-3.05204	0.00227295	0.0132546
ENSRNOG00000005130	OGDH	chr14:87307374-87523225	4089	19146.4	14169.6	5103.64	10457.9	12125	-1.08124	0.409822	-2.63833	0.0083316	0.0385046
ENSRNOG00000029910	GOLGA4	chr8:126393941-126483268	6777	1208.35	1627.66	837.705	478.754	1034.84	-1.082	0.403857	-2.67915	0.00738082	0.0347612
ENSRNOG00000016700	TCF21	chr1:25370182-25373032	1222	1023.09	791.306	361.893	493.447	662.713	-1.08428	0.346703	-3.1274	0.00176363	0.0107
ENSRNOG00000017163	PFKP	chr17:70227567-70290412	2688	4001.33	3591.49	1378.97	2202.76	2774.59	-1.08565	0.345379	-3.14337	0.00167015	0.0102395
ENSRNOG00000017260	CDR2	chr1:197815830-197840738	2347	3444.92	1772.06	1005.12	1408.1	1892.68	-1.08911	0.410191	-2.65514	0.00792759	0.036954
ENSRNOG00000018502	MON1A	chr8:116011553-116036515	1972	1946.18	1470.56	568.959	1023.63	1243.24	-1.08912	0.39037	-2.78997	0.00527127	0.0264417
ENSRNOG00000019036	LDHD	chr19:54557435-54656104	1510	291.67	344.247	123.358	172.645	231.679	-1.09261	0.385863	-2.8316	0.00463158	0.0238188
ENSRNOG00000014660	USP53	chr2:246460174-246521759	6108	483.339	490.956	194.478	262.029	355.351	-1.09417	0.349253	-3.13288	0.00173099	0.0105503
ENSRNOG00000008628	ICA1	chr4:34493596-34639858	1883	837.831	964.585	378.257	470.183	659.089	-1.09443	0.323817	-3.37977	0.000725458	0.0051126
ENSRNOG00000007739	RARS	chr10:20505807-20530334	2104	5794.3	6894.18	2336.26	3616.98	4632.7	-1.09512	0.343532	-3.18784	0.00143341	0.00905091
ENSRNOG00000015233	ETFA	chr8:58608432-58665406	1307	7515.48	6041.65	2533.88	3821.46	4943.71	-1.09515	0.339266	-3.22801	0.00124657	0.00804196
ENSRNOG00000015809	PECR	chr9:79375179-79403569	1019	419.877	541.785	222.8	225.296	350.85	-1.09943	0.351208	-3.13044	0.00174546	0.0106163
ENSRNOG00000018507	GFPT1	chr4:183421402-183467041	2259	483.339	686.184	225.318	317.128	425.545	-1.09992	0.38271	-2.87403	0.00405265	0.021374
ENSRNOG00000012073	ABHD14B	chr8:114514599-114518645	1583	2585.29	2541.42	754.627	1608.91	1859.46	-1.09998	0.411029	-2.67617	0.0074469	0.0350271
ENSRNOG00000005101	LOC100912115	chr6:89744665-89812332	2391	1689.12	2124.4	995.05	778.74	1390.93	-1.10288	0.333633	-3.30568	0.000947447	0.00640439
ENSRNOG00000015837	DNAJC22	chrX:115286884-115291876	1345	2598.75	2412.04	759.662	1550.13	1817.39	-1.10295	0.401932	-2.74412	0.00606728	0.0295961
ENSRNOG00000002790	ABCB7	chrX:75954687-76094049	2271	235.259	259.918	117.065	111.424	179.869	-1.1056	0.377145	-2.9315	0.00337326	0.0183215
ENSRNOG00000014948	OSGIN1	chr19:62825693-62834030	1984	968.602	758.961	297.697	498.345	626.544	-1.1074	0.382655	-2.89398	0.0038039	0.0202675
ENSRNOG00000012204	LOC100294508	chr5:148550211-148642557	4269	4432.11	4405.9	1688	2435.4	3220.18	-1.10754	0.319929	-3.46183	0.000536515	0.00397934
ENSRNOG00000001050	EIF2AK1	chr12:14792377-14825317	2162	865.396	1372.37	619.939	399.166	811.558	-1.10862	0.408527	-2.7137	0.00665365	0.0318492
ENSRNOG00000005390	NUP210	chr4:187804479-187901455	6941	793.6	548.716	250.493	367.33	486.526	-1.10929	0.382308	-2.90155	0.00371318	0.0198422
ENSRNOG00000020485	VAV3	chr2:231716227-232053965	4642	445.518	697.735	285.738	237.54	415.484	-1.10971	0.38994	-2.84585	0.00442926	0.0230022
ENSRNOG00000010752	TMEM41B	chr1:181591181-181605545	2357	1738.48	2074.72	739.521	1032.2	1388.42	-1.11046	0.331721	-3.34756	0.000815256	0.00563103
ENSRNOG00000009097	IMMT	chr4:164531448-164567175	1911	1474.38	2060.86	1032.81	570.586	1280.92	-1.11059	0.41216	-2.69457	0.00704797	0.0334423
ENSRNOG00000026651	ITPR3	chr20:7711507-7774702	8143	739.753	1029.28	509.798	291.415	640.539	-1.1127	0.415167	-2.68013	0.00735932	0.0346824
ENSRNOG00000017606	P2RX1	chr10:59269278-59450774	2468	900.011	596.079	230.353	446.918	539.072	-1.11476	0.432908	-2.57506	0.0100224	0.0449081
ENSRNOG00000033433	CSRNP1	chr8:127861111-127867216	2872	2200.67	1081.26	623.716	857.104	1181.6	-1.11805	0.422041	-2.64914	0.00806968	0.0374724
ENSRNOG00000012494	KCTD14	chr1:168624637-168630653	852	326.286	339.626	159.233	145.708	241.554	-1.11981	0.354111	-3.16231	0.00156521	0.00975627
ENSRNOG00000013331	SDHA	chr1:32971778-32996749	2277	8566.78	7338.93	3096.55	4257.36	5777.65	-1.12022	0.314137	-3.56604	0.000362415	0.0028723
ENSRNOG00000001277	MAFK	chr12:18914796-18925513	2645	2184	2031.98	838.963	1109.34	1531.58	-1.12215	0.309939	-3.62056	0.000293962	0.00241112
ENSRNOG00000018485	GPR155	chr3:66535458-66588943	4810	334.62	336.161	118.953	186.114	242.495	-1.12303	0.392278	-2.86285	0.00419855	0.0219527
ENSRNOG00000016573	DGAT2	chr1:170316040-170346306	2294	9765.51	6451.74	2717.03	4646.73	5851.54	-1.1247	0.388562	-2.89452	0.00379733	0.0202473
ENSRNOG00000042449	CDC42SE2	chr10:39827147-39895658	2917	3240.43	3140.96	1386.52	1558.7	2318.62	-1.12829	0.282213	-3.99799	6.39e-05	0.000666117
ENSRNOG00000022485	CHUK	chr1:271293821-271329346	3526	1704.51	1709.68	720.64	853.431	1240.21	-1.1284	0.295219	-3.82224	0.000132244	0.00122545
ENSRNOG00000037768	RAB43	chr4:184946340-184965637	960	150.643	159.416	68.6024	69.7927	111.69	-1.12847	0.419374	-2.69085	0.00712709	0.0337957
ENSRNOG00000007372	CASP1	chr8:2627972-2636854	1293	5809.69	4352.76	1694.29	2922.72	3668.58	-1.1289	0.375497	-3.00642	0.00264344	0.0150004
ENSRNOG00000011241	TFDP2	chr8:103555031-103624736	2370	401.928	492.111	171.191	235.091	323.262	-1.13151	0.369181	-3.06492	0.00217727	0.0127682
ENSRNOG00000013172	NR1H3	chr3:86712882-86721503	1635	2026.31	1556.04	606.093	1017.5	1292.37	-1.13175	0.374717	-3.02028	0.00252538	0.0144774
ENSRNOG00000017099	NSDHL	chr1:148661898-148692767	1725	612.828	1166.74	358.117	440.796	642.242	-1.13312	0.416069	-2.72338	0.00646171	0.0312213
ENSRNOG00000050106	RCC1	chr5:154176777-154193158	1554	389.749	482.87	244.829	144.483	314.449	-1.13338	0.417697	-2.7134	0.00665968	0.0318492
ENSRNOG00000013296	MGST2	chr2:160180713-160202851	707	7902.66	6834.11	2023.46	4578.16	5296.03	-1.13534	0.422604	-2.68655	0.00721949	0.0341227
ENSRNOG00000005660	FAM110C	chr6:58647799-58654055	3111	692.958	504.819	279.445	263.253	432.448	-1.13624	0.349746	-3.24878	0.00115903	0.00756773
ENSRNOG00000009020	TSTA3	chr7:116851237-116856095	1277	4225.69	4141.36	1390.93	2404.79	3021.2	-1.13669	0.360746	-3.15095	0.00162743	0.0100402
ENSRNOG00000015385	PINK1	chr5:160426050-160437821	804	384.62	442.438	225.947	143.259	297.895	-1.138	0.400316	-2.84275	0.00447256	0.0231619
ENSRNOG00000019601	MAPK3	chr1:205172640-205178843	1781	10733.5	9798.33	3583.69	5749.94	7418.15	-1.13819	0.342159	-3.32648	0.00087949	0.00600916
ENSRNOG00000005707	BFSP1	chr3:144374720-144408658	2132	667.316	523.302	164.898	362.433	426.102	-1.14063	0.446071	-2.55706	0.010556	0.0467873
ENSRNOG00000020175	RNF121	chr1:173285051-173347260	984	669.88	627.269	317.837	269.376	468.663	-1.14199	0.328143	-3.48017	0.000501099	0.00376457
ENSRNOG00000005227	TFAP4	chr10:9969936-9986048	2135	439.749	452.835	206.437	198.358	322.633	-1.14275	0.333786	-3.42361	0.000617961	0.00446963
ENSRNOG00000010814	BMPR1A	chr16:9084569-9114523	3002	438.467	577.596	202.66	254.682	366.695	-1.14313	0.36313	-3.14798	0.00164405	0.0101307
ENSRNOG00000003463	SREBF1	chr10:46311519-46347948	3339	655.778	812.099	365.67	296.313	530.323	-1.14316	0.34577	-3.30612	0.000945967	0.00639736
ENSRNOG00000017794	FUK	chr19:54167904-54190881	3636	1048.73	1159.81	381.404	613.442	796.03	-1.14768	0.361406	-3.1756	0.00149529	0.00940903
ENSRNOG00000042758	TMEM243	chr4:21834166-21852015	1096	2370.54	1755.89	623.086	1213.41	1479.89	-1.14818	0.406741	-2.82286	0.00475968	0.0243363
ENSRNOG00000015450	PPP1R16A	chr7:117722084-117745228	2628	2312.21	2014.65	547.561	1356.67	1546.73	-1.14991	0.446957	-2.57276	0.0100891	0.0451235
ENSRNOG00000017032	ATP5A1	chr18:73830652-73838477	1735	33313.2	30723.5	12918.7	16174.8	23145.3	-1.15007	0.28935	-3.97469	7.05e-05	0.000724968
ENSRNOG00000008103	MDH1	chr14:106449339-106463995	1240	14288	12612.4	4246.43	7803.32	9671.56	-1.15027	0.374062	-3.07506	0.00210458	0.0124069
ENSRNOG00000011250	INMT	chr4:150039150-150043447	1062	203.849	187.141	73.0081	100.404	140.162	-1.15078	0.413149	-2.78539	0.00534629	0.0267627
ENSRNOG00000018319	PISD	chr14:83999011-84034630	2040	2328.23	1876.03	838.963	1057.91	1515.74	-1.15252	0.315773	-3.64983	0.000262418	0.00219314
ENSRNOG00000010697	HADH	chr2:254902139-254944001	1659	7266.76	7710.9	2199.68	4460.61	5375.16	-1.15459	0.396378	-2.91285	0.00358147	0.0192395
ENSRNOG00000003597	TUBA4A	chr9:82184865-82188549	1448	2563.49	1914.15	728.822	1263.62	1606.13	-1.1548	0.38168	-3.02558	0.00248156	0.0142768
ENSRNOG00000000170	SLC30A4	chr3:121344029-121366262	5408	1998.74	2558.75	992.532	1061.58	1645.61	-1.15565	0.311331	-3.71197	0.000205654	0.00178107
ENSRNOG00000011142	CYB5B	chr19:50221835-50255693	2718	2089.77	2792.1	893.09	1295.45	1758.42	-1.15631	0.351266	-3.29184	0.000995328	0.00666312
ENSRNOG00000003229	TSPAN7	chrX:14051180-14072173	1591	3619.28	3166.38	1147.99	1888.08	2439.21	-1.15674	0.35389	-3.26864	0.00108065	0.0071327
ENSRNOG00000012751	TM9SF2	chr15:111913764-111967206	2773	7544.97	8452.53	3355.85	3876.56	5777.73	-1.15775	0.286744	-4.03757	5.4e-05	0.000575938
ENSRNOG00000005291	SLC38A1	chr7:137603304-137667386	2113	374.364	495.577	178.115	209.378	312.79	-1.16009	0.365552	-3.17354	0.00150594	0.00946376
ENSRNOG00000028273	TMEM150B	chr1:75808535-75842777	1667	1621.82	1033.9	436.79	730.987	949.03	-1.16348	0.40188	-2.89508	0.00379057	0.0202261
ENSRNOG00000011340	ANKRD13C	chr2:283426166-283473209	3857	3476.33	3303.85	1295.26	1743.59	2440.28	-1.16534	0.308206	-3.78103	0.000156182	0.00141812
ENSRNOG00000026844	LYPD8	chr10:43610294-43621157	1087	58041.8	57441.9	13550.6	36594.7	41120.3	-1.16598	0.456295	-2.55532	0.010609	0.0469159
ENSRNOG00000001145	CCDC64	chr12:48413868-48501896	3003	226.926	203.314	89.372	100.404	153.893	-1.16611	0.389937	-2.99052	0.00278502	0.0156276
ENSRNOG00000012149	GPSM2	chr2:230953070-230992673	1464	1268.61	1660.01	514.833	784.862	1051.72	-1.16666	0.362667	-3.21688	0.00129595	0.00828941
ENSRNOG00000018204	LOC691960	chr3:121177529-121185650	1395	432.057	373.127	214.619	135.912	287.746	-1.16792	0.400537	-2.91588	0.00354683	0.0190934
ENSRNOG00000022537	E2F8	chr1:105245743-105259620	3190	301.286	309.591	138.464	132.239	219.186	-1.16815	0.358492	-3.25851	0.00111999	0.00735902
ENSRNOG00000008226	ZBTB8OS	chr5:151257316-151268014	438	1082.71	962.274	438.048	475.08	735.379	-1.16937	0.303999	-3.84661	0.000119762	0.00112698
ENSRNOG00000021184	MARK2	chr1:229515235-229578049	2534	851.293	1099.74	468.888	395.492	700.969	-1.17065	0.339657	-3.44657	0.000567757	0.00416231
ENSRNOG00000011672	TPH1	chr1:103746877-103774100	3897	200.003	216.021	72.3787	108.975	148.415	-1.17193	0.422096	-2.77646	0.00549547	0.027331
ENSRNOG00000009096	PON3	chr4:30218888-30245586	1451	2480.16	2790.94	712.458	1585.64	1880.39	-1.17289	0.423419	-2.77004	0.00560496	0.0277241
ENSRNOG00000001442	POR	chr12:25995662-26044117	2438	7929.59	6969.27	2458.36	4120.22	5334.51	-1.17527	0.354614	-3.31421	0.000919013	0.0062495
ENSRNOG00000006947	PDHX	chr3:99552949-99576700	1660	174.361	228.728	106.995	64.895	143.32	-1.17532	0.460032	-2.55487	0.0106228	0.0469626
ENSRNOG00000021139	ESRRA	chr1:229158448-229169579	2156	5603.92	4595.35	1610.58	2870.07	3645.24	-1.17616	0.373888	-3.14576	0.00165657	0.0101906
ENSRNOG00000046493	PNPO	chr10:84665835-84672099	2050	1617.97	1296.12	516.092	768.945	1042.96	-1.17686	0.34917	-3.37045	0.00075046	0.00526587
ENSRNOG00000020417	GSK3A	chr1:83366056-83374707	1498	2198.1	2119.78	1097.64	805.678	1548.63	-1.17748	0.326072	-3.6111	0.000304897	0.00248819
ENSRNOG00000032917	ZFAND2A	chr12:19239056-19250441	3194	1659	1076.64	611.757	587.728	978.065	-1.17843	0.350806	-3.3592	0.000781681	0.00544821
ENSRNOG00000009286	NOXA1	chr3:2281048-2290537	1378	341.03	270.315	88.1132	173.87	216.748	-1.18131	0.449975	-2.62528	0.00865774	0.0397721
ENSRNOG00000015118	CPPED1	chr10:2523591-2643424	2070	1833.36	2089.74	687.912	1040.77	1405.18	-1.18157	0.342678	-3.44806	0.000564624	0.00414979
ENSRNOG00000018359	SMAD7	chr18:70530558-70558925	4295	1094.89	1070.86	415.391	542.424	776.335	-1.18262	0.318194	-3.71665	0.00020188	0.0017536
ENSRNOG00000013409	GCLM	chr2:243862902-243883273	1486	865.396	1609.18	400.286	664.868	880.961	-1.18511	0.435549	-2.72097	0.00650907	0.0313758
ENSRNOG00000024128	ACO2	chr7:123077862-123121030	3295	18534.2	16393.3	6213.24	9163.67	12498.5	-1.18668	0.324345	-3.65871	0.000253489	0.00212706
ENSRNOG00000028569	ARHGAP27	chr10:91186346-91214912	2610	662.829	783.22	380.145	246.111	516.188	-1.18674	0.379304	-3.12873	0.00175566	0.0106695
ENSRNOG00000016512	SEMA3B	chr8:115710331-115717175	2511	444.236	411.248	202.66	170.196	305.541	-1.18697	0.349008	-3.40099	0.000671411	0.00478729
ENSRNOG00000033101	MYO18A	chr10:66559667-66646100	6751	2464.77	3088.98	1358.83	1076.28	1989.58	-1.18714	0.327777	-3.62178	0.00029258	0.00240113
ENSRNOG00000011503	SHB	chr5:65479896-65586265	1506	373.082	534.853	185.667	209.378	324.384	-1.1877	0.375154	-3.1659	0.00154602	0.00966978
ENSRNOG00000042962	PDSS2	chr20:49627298-49851499	2072	505.776	605.32	232.241	254.682	397.63	-1.1881	0.33589	-3.53715	0.000404466	0.00314904
ENSRNOG00000015030	TJP2	chr1:249224595-249358699	4691	1890.41	2235.29	705.535	1099.54	1474.66	-1.1887	0.351278	-3.38394	0.000714547	0.00505527
ENSRNOG00000017642	ACBD5	chr17:91544958-91589401	1545	434.621	656.149	276.298	193.461	388.844	-1.18917	0.405571	-2.93209	0.00336689	0.0183067
ENSRNOG00000006859	INSIG1	chr4:337379-345601	2428	2225.03	5872.99	1637.02	1798.69	2876.33	-1.18936	0.465609	-2.55443	0.0106363	0.047008
ENSRNOG00000019885	MAGI3	chr2:225923269-226123408	5866	407.697	725.46	296.438	184.89	402.598	-1.18965	0.446775	-2.66274	0.00775074	0.0362456
ENSRNOG00000017765	NET1	chr17:71714422-71724531	3147	6065.46	6843.35	1763.52	3809.21	4591.92	-1.18986	0.412922	-2.88157	0.00395702	0.0209683
ENSRNOG00000006143	NGLY1	chr15:14450835-14501356	2189	892.96	1157.5	546.302	336.719	731.215	-1.19067	0.390087	-3.05232	0.00227078	0.0132473
ENSRNOG00000015225	GRAMD3	chr18:50688263-50786064	2531	3050.68	2943.43	1194.56	1444.83	2146.62	-1.19308	0.29111	-4.09839	4.16e-05	0.00046121
ENSRNOG00000019743	TMEM63B	chr9:16570773-16769589	2499	778.215	1024.65	409.726	375.901	644.668	-1.1941	0.337247	-3.54074	0.000399009	0.00311154
ENSRNOG00000040257	CHMP2B	chr11:2650916-2676654	1269	1403.22	2028.52	701.129	793.433	1226.34	-1.19739	0.341704	-3.50416	0.00045805	0.0034955
ENSRNOG00000005865	SSFA2	chr3:73152917-73190192	5206	2037.85	2289.59	848.404	1046.89	1547.82	-1.19907	0.30447	-3.93821	8.21e-05	0.000821863
ENSRNOG00000030790	CTNND1	chr3:78522965-78740155	4732	3398.12	5568.02	2432.55	1359.12	3182.5	-1.20212	0.425009	-2.82845	0.00467735	0.024025
ENSRNOG00000017481	SUCLA2	chr15:59183905-59238106	1728	4001.97	3701.23	1424.92	1930.93	2748.73	-1.20462	0.309529	-3.89178	9.95e-05	0.000963287
ENSRNOG00000019466	AGPAT2	chr3:9395190-9415283	1360	4686.6	4713.18	1124.7	2840.69	3319.57	-1.20875	0.445344	-2.71421	0.00664348	0.0318445
ENSRNOG00000018330	FAM83F	chr7:121880993-121910618	3062	1011.55	1173.67	257.416	659.97	770.975	-1.20946	0.463086	-2.61173	0.00900841	0.0410593
ENSRNOG00000000645	REEP3	chr20:25003933-25086732	2498	1185.91	1314.61	408.468	667.317	888.993	-1.21056	0.363012	-3.33477	0.000853698	0.00586042
ENSRNOG00000010452	CYCS	chr4:145002163-145004305	1242	26706.1	17930.9	6118.2	12764.7	15763.6	-1.21067	0.422977	-2.86225	0.00420645	0.0219783
ENSRNOG00000003064	BST1	chr14:71827039-71843323	1390	4510.31	3426.3	1470.86	1955.42	2822.81	-1.21147	0.326725	-3.70793	0.000208961	0.00180126
ENSRNOG00000005528	TBK1	chr7:63877566-63910298	2987	2168.62	1893.36	879.244	881.593	1448.08	-1.21279	0.291274	-4.16374	3.13e-05	0.000364022
ENSRNOG00000004292	SPTSSA	chr6:85080145-85091608	1304	4766.73	6154.86	1976.25	2726.81	3887.31	-1.21652	0.332879	-3.65454	0.000257647	0.00215698
ENSRNOG00000031748	KIFC2	chr7:117711348-117720470	3167	609.623	591.458	195.108	317.128	425.722	-1.21679	0.375746	-3.23834	0.00120227	0.00780457
ENSRNOG00000020005	MAP2K2	chr7:11626351-11645697	1364	14304	11838.4	3169.56	7788.63	9210.3	-1.21798	0.441129	-2.76106	0.00576147	0.0283922
ENSRNOG00000006353	GYLTL1B	chr3:87979496-87985625	2396	134.617	162.882	47.2035	75.9149	104.717	-1.22416	0.468582	-2.61248	0.00898879	0.0409955
ENSRNOG00000005924	DSTN	chr3:144462863-144489654	1686	51630.1	48074.4	16387.8	26238.4	35369	-1.2243	0.339371	-3.60754	0.000309111	0.00251835
ENSRNOG00000007496	MTMR4	chr10:75192506-75215438	5683	2840.42	2284.97	964.839	1230.56	1819.38	-1.22484	0.315655	-3.88031	0.000104324	0.00100111
[truncated: 1,341 more rows]

## Sheet: 4N-4A
gene_id	Symbol	locus	length	A_4A	A_4B	N_4A	N_4B	baseMean	log2FoldChange	lfcSE	stat	pvalue	padj
ENSRNOG00000029890	IGHG3	chr6:147047267-147286431	1145	25.0228	37.5053	1755.66	1583.2	837.805	5.18688	0.37396	13.8702	9.6062e-44	6.77525e-40
ENSRNOG00000014231	PNOC	chr15:52547685-52574352	1015	32.5296	60.7844	679.16	375.771	282.992	2.97365	0.45698	6.50717	7.65804e-11	1.38493e-08
ENSRNOG00000004882	CAPN6	chrX:113502311-113527023	3494	7.50684	24.5724	176.749	164.752	92.4197	2.69971	0.513409	5.2584	1.45316e-07	1.20579e-05
ENSRNOG00000009269	CGA	chr5:54950197-54962321	669	2.50228	49.1448	398.728	454.761	223.307	2.67167	0.608534	4.39034	1.13173e-05	0.000491208
ENSRNOG00000046165	MPTX	chr13:96287419-96290813	660	321.543	1982.61	15592.9	10211.3	6926.5	2.60005	0.561797	4.62809	3.69049e-06	0.000187935
ENSRNOG00000047836	RGD1565617	chr3:24585555-24586167	375	10.0091	2.58657	20.8758	341.917	92.7232	2.59279	0.643246	4.03079	5.55892e-05	0.00188043
ENSRNOG00000042860	PAPPA2	chr13:81303662-81574592	9258	8.75798	16.8127	118.296	115.101	63.8267	2.58539	0.49608	5.21165	1.87171e-07	1.45869e-05
ENSRNOG00000045551	MYH2	chr10:53467096-53491312	5872	12.5114	11.6396	91.1578	111.716	56.1782	2.48863	0.49025	5.07625	3.84953e-07	2.67495e-05
ENSRNOG00000008591	COLEC10	chr7:94613482-94674031	4552	63.8082	103.463	547.643	560.835	314.5	2.45296	0.389181	6.30286	2.92194e-10	4.79266e-08
ENSRNOG00000003896	TNMD	chrX:104520019-104535506	1323	5.00456	12.9328	77.2406	84.633	44.3689	2.41859	0.545483	4.43384	9.25688e-06	0.000414532
ENSRNOG00000048703	FAM150A	chr5:17668933-17697947	384	0	2.58657	19.4841	53.0367	18.4946	2.2841	0.647731	3.52631	0.000421391	0.0100238
ENSRNOG00000027212	TEKT3	chr10:49250931-49284884	1731	18.7671	5.17314	109.946	78.9908	52.4275	2.22926	0.560604	3.97652	6.99298e-05	0.00229937
ENSRNOG00000010349	GHRL	chr4:208970555-208974465	500	47.5433	69.8374	236.593	485.229	207.136	2.22325	0.460689	4.82592	1.39361e-06	8.25977e-05
ENSRNOG00000010661	GZMK	chr2:64101924-64109992	882	2.50228	10.3463	62.6275	50.7798	31.3012	2.21195	0.584752	3.78271	0.00015513	0.00438529
ENSRNOG00000001963	MX2	chr11:41546196-41570078	2553	180.164	157.781	1227.5	662.394	548.705	2.21077	0.404501	5.46542	4.61805e-08	4.25766e-06
ENSRNOG00000009867	TGFB3	chr6:119222051-119243828	2619	316.538	615.603	3111.2	2171.12	1531.81	2.20013	0.418615	5.25572	1.47445e-07	1.21629e-05
ENSRNOG00000034139	LYC2	chr7:60318026-60325591	1413	23.7717	11.6396	23.6593	472.816	131.449	2.19086	0.639213	3.42743	0.000609316	0.0133463
ENSRNOG00000016042	ALDH1A2	chr8:75363284-75442554	2244	232.712	225.032	1366.67	968.202	688.066	2.16149	0.349902	6.17742	6.51561e-10	9.47518e-08
ENSRNOG00000016164	FCRL2	chr2:205998854-206009505	2109	36.2831	517.314	2549.64	2586.38	1402.79	2.13291	0.611067	3.49047	0.000482175	0.0111684
ENSRNOG00000007999	ABRA	chr7:80816574-80820643	1282	2.50228	3.87985	36.1848	30.4679	17.984	2.10216	0.612065	3.43454	0.000593558	0.0130993
ENSRNOG00000022684	GPC3	chrX:139625386-139993343	2229	260.237	143.555	1115.47	898.238	595.213	2.07774	0.395873	5.2485	1.53342e-07	1.23602e-05
ENSRNOG00000004476	WIF1	chr7:63077687-63147645	2196	3.75342	32.3321	149.61	125.257	76.6852	2.04005	0.59404	3.43419	0.000594327	0.0130993
ENSRNOG00000037744	LOC100910735	chr12:44192562-44204571	1644	8.75798	3.87985	66.8027	32.7248	27.8129	2.03218	0.596025	3.40956	0.000650677	0.014099
ENSRNOG00000018405	APOC4	chr1:81860927-81865042	509	1.25114	29.7455	93.2454	248.257	91.7803	2.01569	0.638329	3.15775	0.00158991	0.0283531
ENSRNOG00000048402	IGH-1A	chr6:147047267-147286431	1154	385.351	4416.57	19041.5	17625.1	10226.8	2.01414	0.600085	3.35643	0.000789568	0.0164272
ENSRNOG00000002947	DPT	chr13:87954463-87983316	1101	3712.13	4340.26	19826.5	16106.2	10839.5	2.01373	0.31904	6.31184	2.7574e-10	4.57598e-08
ENSRNOG00000017786	ACTA1	chr19:67389900-67392928	1453	943.36	1399.33	4252.41	6479.5	3224.03	1.98017	0.382857	5.17209	2.31485e-07	1.75555e-05
ENSRNOG00000045599	AABR06091206.1	chr17:33670021-33670808	396	7.50684	18.106	64.0192	90.2752	44.3894	1.97636	0.542546	3.64275	0.000269736	0.00688007
ENSRNOG00000018426	APOC1	chr1:81872116-81875399	401	7.50684	166.834	887.223	617.257	413.946	1.94429	0.626295	3.10444	0.00190643	0.0322834
ENSRNOG00000022635	DLG2	chr1:162798343-163514250	1672	3.75342	5.17314	38.2724	29.3394	18.7235	1.93672	0.605586	3.19809	0.00138343	0.0254098
ENSRNOG00000020424	PPAPDC1A	chr1:209449939-209577459	1242	1.25114	5.17314	29.2262	30.4679	16.0237	1.93634	0.634611	3.05123	0.00227909	0.037339
ENSRNOG00000011800	F3	chr2:243348429-243360438	1768	391.607	1011.35	2885.74	3677.59	1965.28	1.89889	0.455902	4.16514	3.11168e-05	0.00114904
ENSRNOG00000011824	TRH	chr4:189148793-189151289	1360	3.75342	46.5582	142.652	221.174	102.393	1.87281	0.61262	3.05705	0.00223527	0.0367043
ENSRNOG00000008245	PTGIS	chr3:170109318-170249262	1488	251.479	296.162	1352.75	909.523	692.46	1.86719	0.364681	5.12005	3.05449e-07	2.19284e-05
ENSRNOG00000001959	MX1	chr11:41398737-41420543	3106	248.977	253.484	1326.31	762.825	638.327	1.8505	0.387405	4.77665	1.78237e-06	0.000103466
ENSRNOG00000029744	CES2J	chr19:487189-494404	1671	670.611	942.804	2539.89	4145.89	2046.93	1.84278	0.388158	4.74749	2.05958e-06	0.000117621
ENSRNOG00000021001	GIF	chr1:235185899-235200148	1352	20.0182	3.87985	84.8951	59.8073	41.5893	1.83397	0.590337	3.10666	0.00189216	0.0321419
ENSRNOG00000001414	SERPINE1	chr12:24653384-24663763	3063	230.21	1853.28	7169.46	4966.26	3506.7	1.82835	0.581488	3.14426	0.00166507	0.0293594
ENSRNOG00000015410	ASPN	chr17:16708332-16731733	1525	85.0775	156.487	482.928	519.082	306.538	1.81725	0.411178	4.41961	9.8879e-06	0.000438612
ENSRNOG00000012235	PPP1R17	chr4:150928121-150944836	1734	15.0137	6.46642	48.7103	59.8073	32.0155	1.76222	0.567077	3.10754	0.0018865	0.0321388
ENSRNOG00000020706	KCNN3	chr2:208267082-208411808	2508	17.516	15.5194	71.6737	77.8624	45.3425	1.75975	0.494979	3.5552	0.000377692	0.00912282
ENSRNOG00000005094	C1QTNF7	chr14:72037996-72148187	1660	72.5661	199.166	689.598	479.587	355.615	1.75213	0.481022	3.64253	0.000269977	0.00688007
ENSRNOG00000004540	LOC100912012	chr8:131394765-131400452	949	603.05	896.246	3075.01	2573.97	1762.29	1.74996	0.3573	4.89773	9.69485e-07	5.99805e-05
ENSRNOG00000048767	MCPT10	chrX:6578815-6581777	840	882.054	563.872	2821.72	2553.66	1680.46	1.7405	0.354474	4.91008	9.10379e-07	5.70747e-05
ENSRNOG00000013484	GSTA1	chr9:26283550-26300195	1157	201.434	219.858	934.542	608.229	483.98	1.7004	0.372233	4.56811	4.92148e-06	0.000240027
ENSRNOG00000012094	LTBP2	chr6:116956932-117049306	6452	1627.73	2397.75	8162.45	6305.72	4559.52	1.68475	0.359703	4.68373	2.81705e-06	0.000150319
ENSRNOG00000014350	CYR61	chr2:270055953-270058912	1984	821.999	2364.12	7351.77	5405.23	3932.47	1.678	0.473519	3.54367	0.000394599	0.00945028
ENSRNOG00000008336	TNFRSF11B	chr7:94436612-94464618	2785	252.73	536.713	1420.95	1552.73	928.495	1.67646	0.421766	3.97485	7.04244e-05	0.00229997
ENSRNOG00000011263	PLAC9	chr16:3817393-3831461	410	28.7762	69.8374	241.464	163.624	124.287	1.6728	0.491871	3.4009	0.000671647	0.0143986
ENSRNOG00000011478	ACKR4	chr8:111982415-112062756	1053	76.3196	109.929	291.566	389.312	213.819	1.6672	0.401385	4.15361	3.27271e-05	0.00119909
ENSRNOG00000021474	SIGLEC5	chr1:99639155-99647531	2474	153.89	218.565	1392.42	280.982	503.919	1.66121	0.547728	3.03292	0.00242201	0.0393126
ENSRNOG00000010977	IGFBP6	chr7:141546159-141551065	966	701.89	750.105	2920.53	2091	1593.03	1.65201	0.338327	4.88287	1.04555e-06	6.30276e-05
ENSRNOG00000020633	MCPT1L1	chr15:38499890-38790387	1016	76.3196	32.3321	261.644	164.752	131.699	1.64746	0.488458	3.37277	0.000744156	0.0156299
ENSRNOG00000018611	TPSB2	chr10:14539008-14540808	1095	18.7671	19.3993	65.4109	85.7614	46.5892	1.63263	0.496895	3.28566	0.00101744	0.0200167
ENSRNOG00000011181	CPA3	chr2:124745512-124777636	1433	549.251	547.059	1710.43	1954.46	1173.37	1.63057	0.311594	5.23301	1.66772e-07	1.32162e-05
ENSRNOG00000012471	THBS4	chr2:41549117-41590922	3039	218.95	690.614	1260.2	2429.53	1135.41	1.63041	0.509245	3.20163	0.00136654	0.0252309
ENSRNOG00000002382	LOC100911714	chr10:47538039-47540977	1483	1618.98	5733.13	19605.2	10399.7	9213.65	1.62155	0.51669	3.13834	0.0016991	0.0297363
ENSRNOG00000006627	CYS1	chr6:60716419-60733664	2964	106.347	59.4911	296.437	286.624	184.238	1.61001	0.416238	3.868	0.000109732	0.00332164
ENSRNOG00000007888	FAM46B	chr5:155354241-155361518	1701	20.0182	34.9187	98.1164	111.716	65.3579	1.60819	0.482232	3.33489	0.000853324	0.0175211
ENSRNOG00000023546	HSPB1	chr12:25837083-25838661	806	925.844	1555.82	4689.41	3836.7	2714.55	1.60615	0.379141	4.2363	2.2723e-05	0.000895336
ENSRNOG00000001943	RETNLG	chr11:57674750-57676090	336	87.5798	28.4523	272.778	182.807	140.78	1.59574	0.51377	3.10595	0.0018967	0.0321572
ENSRNOG00000007949	RGN	chrX:2626532-2641949	1592	35.0319	33.6254	107.163	141.055	78.1437	1.59398	0.443747	3.59209	0.000328039	0.00804752
ENSRNOG00000022242	CXCL9	chr14:17145005-17150876	1170	52.5479	166.834	539.988	326.119	267.863	1.59062	0.511224	3.1114	0.00186201	0.0318351
ENSRNOG00000008943	PENK	chr5:21834413-21839739	1284	15.0137	41.3851	109.25	111.716	68.3382	1.5738	0.521353	3.01867	0.00253883	0.0408355
ENSRNOG00000026059	PAQR6	chr2:207140709-207144108	1095	45.0411	42.6784	172.574	130.899	96.5974	1.56749	0.424822	3.68975	0.000224472	0.0059296
ENSRNOG00000006783	NEB	chr3:42756011-42953918	9634	56.3013	65.9575	185.795	225.688	131.665	1.56554	0.399932	3.91452	9.05857e-05	0.00282783
ENSRNOG00000010489	SAMD4A	chr15:27721128-27815275	2240	13.7625	23.2791	83.5033	58.6789	44.3762	1.55164	0.520988	2.97827	0.00289885	0.044886
ENSRNOG00000015397	CPNE7	chr19:66634978-66651622	2212	118.858	147.434	482.928	379.156	278.072	1.54108	0.368896	4.17755	2.94668e-05	0.00110548
ENSRNOG00000012516	C7	chr2:73735308-73802191	4659	4057.45	6350.03	16196.9	17192.9	10802.1	1.53718	0.356701	4.30945	1.63664e-05	0.000679014
ENSRNOG00000001372	OAS1B	chr12:43116713-43127900	2372	87.5798	78.8904	395.249	181.679	183.268	1.52925	0.455742	3.35553	0.000792136	0.0164564
ENSRNOG00000020582	MCPT1	chr15:38499890-38790387	984	116.356	168.127	418.908	499.899	296.699	1.52857	0.380007	4.02247	5.7591e-05	0.00193885
ENSRNOG00000038960	RGD1309362	chr18:54739046-54741758	2712	302.776	437.13	1450.17	950.147	774.122	1.52417	0.387167	3.93672	8.26014e-05	0.00263019
ENSRNOG00000010524	CRYAB	chr8:53775524-53779781	1248	394.109	782.437	2007.56	1865.31	1245.47	1.52197	0.407578	3.73419	0.000188317	0.00520863
ENSRNOG00000022256	CXCL10	chr14:17126850-17129068	1154	206.438	175.887	574.781	613.871	387.187	1.51754	0.335526	4.52286	6.10088e-06	0.00029074
ENSRNOG00000024382	FCGR3A	chr13:93924703-94068497	1199	106.347	235.378	636.713	513.44	367.793	1.51041	0.443409	3.40635	0.00065837	0.0142003
ENSRNOG00000001469	ELN	chr12:26978752-27022484	3434	1083.49	2662.87	6243.27	6195.14	3993.25	1.49316	0.441305	3.38351	0.000715647	0.015178
ENSRNOG00000033699	RGD1561306	chr4:212473337-212823540	1085	297.771	358.24	1368.06	719.945	676.266	1.48063	0.407672	3.63192	0.000281325	0.00711179
ENSRNOG00000007091	LY6E	chr7:116253323-116257488	1263	1909.24	2237.38	8836.05	4333.21	4267.03	1.47754	0.408225	3.61942	0.000295268	0.00742432
ENSRNOG00000005574	ADAMTS8	chr8:32044797-32063464	2718	50.0456	49.1448	121.776	201.991	104.296	1.47645	0.444691	3.32017	0.00089962	0.0181806
ENSRNOG00000000705	WSCD2	chr12:50604425-50644721	1707	23.7717	20.6926	64.7151	90.2752	49.2987	1.47221	0.492221	2.99096	0.00278104	0.0434915
ENSRNOG00000004229	TAC3	chr7:71196644-71203251	723	228.959	133.208	499.628	628.541	367.331	1.46964	0.397842	3.69403	0.000220732	0.00586373
ENSRNOG00000029401	ACTG2	chr4:179805782-179830338	1312	31530	43389.7	122555	101151	73635.1	1.45547	0.339583	4.28606	1.81873e-05	0.000743625
ENSRNOG00000029508	SLPIL2	chr3:166920397-166922851	393	193.927	187.526	508.675	622.899	373.244	1.44596	0.342516	4.22159	2.42586e-05	0.000947899
ENSRNOG00000012709	BAG2	chr9:38145392-38147902	1419	291.516	711.306	1617.18	1588.84	1038.58	1.44268	0.443765	3.251	0.00115	0.0221915
ENSRNOG00000029079	HSPB7	chr5:163688377-163692101	2006	237.717	314.268	798.849	830.532	538.092	1.43772	0.344311	4.17565	2.97135e-05	0.00110591
ENSRNOG00000006670	RAI2	chrX:35074628-35135655	2564	137.625	160.367	417.517	449.119	287.255	1.41559	0.348676	4.05989	4.90958e-05	0.00167687
ENSRNOG00000046005	LOC100912469	chr1:271502293-271515353	5046	1601.46	2446.89	5397.1	6351.99	3896.75	1.40304	0.358741	3.911	9.19142e-05	0.00284954
ENSRNOG00000037198	USP18	chr4:220895596-220922138	1606	181.415	173.3	767.535	317.092	354.505	1.38314	0.453862	3.04749	0.00230763	0.0377626
ENSRNOG00000048924	ISLR	chr8:62723486-62724773	1287	202.685	147.434	526.767	463.789	330.405	1.3735	0.360485	3.81015	0.000138884	0.00400633
ENSRNOG00000012581	RGD1311933	chr1:32835726-32851816	1014	116.356	108.636	212.934	461.532	221.94	1.36394	0.448938	3.03814	0.00238042	0.0387292
ENSRNOG00000017628	TAGLN	chr8:48824387-48852863	1422	18907.2	33201.2	83002.3	66380.5	49700.4	1.36351	0.385913	3.53322	0.000410536	0.00979867
ENSRNOG00000019810	DES	chr9:82325844-82333553	2163	25324.3	36981.5	93551.6	79924	58149.5	1.35626	0.347233	3.9059	9.38744e-05	0.00290393
ENSRNOG00000012034	CES2I	chr1:289903226-289910829	1889	106.347	115.102	242.856	391.569	211.101	1.35398	0.404363	3.34842	0.000812737	0.0168291
ENSRNOG00000011068	PAPSS2	chr1:258376174-258461336	3490	2148.21	2308.51	5289.94	6806.75	4082.01	1.34192	0.321167	4.17827	2.93736e-05	0.00110492
ENSRNOG00000009263	IFI27	chr6:136548420-136554959	867	3390.59	3828.12	14039	6627.33	6872.07	1.34001	0.412781	3.24631	0.00116913	0.0224989
ENSRNOG00000004317	VIPR2	chr6:152876206-152945274	3360	127.616	143.555	401.512	347.56	251.963	1.33926	0.355447	3.76782	0.000164679	0.0046274
ENSRNOG00000003870	C1QTNF2	chr10:28909017-28925541	1216	246.475	402.211	1127.99	714.303	614.056	1.33096	0.410534	3.24203	0.00118681	0.0227771
ENSRNOG00000020559	CDKN1C	chr1:223521110-223523972	1870	374.091	567.752	1430.69	1161.16	871.599	1.32449	0.368856	3.59082	0.000329643	0.00805883
ENSRNOG00000034290	CCL21	chr5:62722615-62723743	861	925.844	1104.46	2030.52	3590.7	1887.49	1.32075	0.387343	3.40977	0.000650181	0.014099
ENSRNOG00000047669	CES2A	chr19:506189-507414	396	467.926	484.982	919.233	1722	886.372	1.3136	0.397967	3.30077	0.000964192	0.0190769
ENSRNOG00000020563	CMA1	chr15:38490970-38493753	981	325.296	328.494	995.777	751.541	591.815	1.31098	0.34019	3.85366	0.000116366	0.0034703
ENSRNOG00000005188	TSPAN11	chr4:231093058-231159271	3783	66.3104	87.9433	217.109	207.633	142.789	1.30797	0.395461	3.30747	0.000941441	0.0188102
ENSRNOG00000027736	CNN1	chr8:23167862-23176532	1456	7742.06	12498.3	28662.5	25811.9	18430.1	1.29889	0.363643	3.57188	0.000354433	0.00863494
ENSRNOG00000036604	IFIT2	chr1:260116147-260122211	3409	188.922	332.374	822.508	613.871	482.974	1.2949	0.407355	3.17879	0.00147892	0.0267458
ENSRNOG00000003205	LDB2	chr14:70817549-71145367	2376	152.639	290.989	702.124	514.569	409.755	1.27152	0.423624	3.00152	0.00268634	0.0424913
ENSRNOG00000000413	PLN	chr20:36333902-36441228	496	155.141	138.381	345.843	413.009	259.336	1.25874	0.35479	3.54785	0.00038839	0.00933327
ENSRNOG00000022218	IFI44	chr2:275575814-275593538	1667	311.534	391.865	1223.32	645.468	634.037	1.24418	0.410514	3.03079	0.00243914	0.0395023
ENSRNOG00000012393	S100A13	chr2:209336485-209342980	484	1126.03	1039.8	2910.09	2456.61	1856.78	1.22529	0.310824	3.94207	8.0783e-05	0.00257811
ENSRNOG00000016731	TPM2	chr5:63541286-63550225	1260	15208.9	21465.9	50939.1	41146.3	31756.6	1.21942	0.346116	3.52316	0.000426435	0.010059
ENSRNOG00000036790	OLFML1	chr1:178792339-178816630	2920	145.132	161.661	378.548	388.183	264.832	1.21405	0.347112	3.49756	0.000469531	0.0109114
ENSRNOG00000049771	GSTT1	chr20:15989082-16006507	948	167.653	204.339	565.735	375.771	323.964	1.20597	0.383366	3.14574	0.00165668	0.0292479
ENSRNOG00000015904	WFDC1	chr19:63061865-63080767	1256	370.338	412.558	1020.13	903.88	667.456	1.20578	0.323406	3.72839	0.000192708	0.00530925
ENSRNOG00000025120	GLI1	chr7:70787048-70804243	3501	170.155	120.275	400.816	323.862	250.075	1.19602	0.379039	3.1554	0.00160276	0.0285067
ENSRNOG00000021102	SCN1B	chr1:90705284-90715018	1415	215.196	280.643	738.309	498.771	427.326	1.18773	0.380443	3.12196	0.00179651	0.031094
ENSRNOG00000004678	ITLN1	chr13:94546195-94556299	1127	9298.47	6069.38	19299.7	18170.1	13017.8	1.18716	0.344058	3.45046	0.00055963	0.0125829
ENSRNOG00000009177	FCER1A	chr13:96245260-96251469	1055	127.616	96.9963	237.985	320.477	192.995	1.17663	0.391247	3.00737	0.00263516	0.0419543
ENSRNOG00000013771	CLCA2	chr2:269482262-269508776	4049	253.981	199.166	467.619	628.541	382.07	1.16434	0.364175	3.1972	0.00138771	0.025422
ENSRNOG00000012008	S100A3	chr2:209427356-209430124	669	185.169	225.032	517.025	461.532	342.538	1.15264	0.347785	3.31423	0.000918958	0.0184655
ENSRNOG00000020456	NUCB2	chr1:192078546-192114979	1615	1000.91	1633.42	3793.84	2632.65	2235.11	1.15086	0.389979	2.95108	0.00316662	0.0481485
ENSRNOG00000017369	MUSTN1	chr16:6889472-6891725	1080	302.776	435.837	983.252	784.266	618.115	1.14182	0.365983	3.11988	0.00180922	0.031161
ENSRNOG00000016103	NKD2	chr1:33482720-33509554	4017	352.822	429.37	953.33	868.899	642.19	1.12949	0.330922	3.41316	0.000642144	0.013957
ENSRNOG00000020480	FADS1	chr1:233178775-233193796	3372	396.611	570.338	1224.02	1038.16	796.494	1.11851	0.357038	3.13276	0.00173171	0.0302694
ENSRNOG00000018247	DHX58	chr10:88393940-88405108	2373	228.959	227.618	645.063	427.679	377.131	1.11707	0.370637	3.01392	0.00257896	0.0411526
ENSRNOG00000020246	MYL9	chr3:158832628-158838991	1098	16178.5	21186.6	51031.7	36009.7	30679.8	1.1164	0.352017	3.17143	0.00151692	0.0272582
ENSRNOG00000003616	GREM2	chr13:97359448-97453188	3719	374.091	552.232	1121.03	1037.04	760.802	1.11307	0.357697	3.11177	0.00185971	0.0318351
ENSRNOG00000019965	TGFB1I1	chr1:206710119-206716908	1963	1183.58	1598.5	3939.27	2562.69	2289.51	1.10798	0.372156	2.9772	0.00290898	0.0449935
ENSRNOG00000011541	CYGB	chr10:105280904-105290670	2111	1059.72	1429.08	2774.4	2657.48	1953.73	1.03988	0.332549	3.12698	0.00176609	0.0307276
ENSRNOG00000008937	CSRP1	chr13:57601913-57623352	1678	11171.4	13628.6	28707.8	23622.8	19022.8	1.00042	0.321996	3.10694	0.00189038	0.0321419
ENSRNOG00000006472	HSPA2	chr6:108843799-108846300	2501	566.767	492.741	1057.71	1157.78	807.633	0.992785	0.317089	3.13094	0.0017425	0.0304205
ENSRNOG00000000875	FHL1	chrX:153788933-153803150	2082	3555.74	3226.74	6804.13	6586.7	4973.73	0.923064	0.296666	3.11146	0.00186163	0.0318351
ENSRNOG00000018673	SEC22B	chr2:219551810-219573833	2651	4829.4	4091.95	2332.53	2276.06	3338.65	-0.90231	0.303856	-2.96953	0.00298253	0.0458795
ENSRNOG00000014254	CPT1A	chr1:225437254-225497583	4379	2486.02	2462.41	1127.3	1378.95	1840.49	-0.925951	0.314392	-2.94521	0.00322738	0.0488471
ENSRNOG00000005360	DHRS7B	chr10:46837697-46884558	1199	2883.88	2217.98	1263.68	1248.05	1878.25	-0.960316	0.319764	-3.0032	0.00267155	0.0423426
ENSRNOG00000003300	BTG2	chr13:55966298-55970058	2519	8121.15	5999.55	3569.77	3315.36	5181.05	-0.971622	0.32346	-3.00384	0.00266597	0.0423016
ENSRNOG00000019673	ZFP36	chr1:86595417-86597898	1811	6409.59	5306.35	2815.45	2923.79	4307.05	-0.973578	0.306107	-3.18051	0.00147015	0.0266212
ENSRNOG00000030334	ADCK5	chr7:117631879-117660364	1990	1954.28	1438.13	833.642	792.165	1237.67	-0.991007	0.330799	-2.9958	0.00273722	0.043093
ENSRNOG00000007133	PLXNB2	chr7:129821098-129836927	6370	9212.15	6532.38	4047.13	3386.45	5715.63	-1.0082	0.33716	-2.99028	0.00278726	0.0435405
ENSRNOG00000009552	SERINC3	chr3:166209488-166228921	2143	8002.29	6466.42	3303.25	3578.28	5267.61	-1.01153	0.310454	-3.25821	0.00112116	0.0216942
ENSRNOG00000025296	LRRC8A	chr3:14155801-14181483	3304	479.187	562.579	250.51	239.229	378.501	-1.0161	0.338629	-3.00062	0.00269435	0.0425605
ENSRNOG00000011352	FURIN	chr1:143137722-143150202	4264	6868.76	5821.07	3159.21	2861.72	4617.28	-1.01732	0.305905	-3.32559	0.000882306	0.0179334
ENSRNOG00000008393	TAX1BP1	chr4:147442104-147499135	2896	12692.8	8789.16	4964.27	5062.18	7769.94	-1.02537	0.332889	-3.08023	0.00206842	0.0345292
ENSRNOG00000000800	MAN1A1	chr20:37015822-37203609	3857	1458.83	1083.77	516.329	655.624	916.414	-1.035	0.347288	-2.98023	0.00288032	0.0446618
ENSRNOG00000009094	NUDT4	chr7:36695608-36711834	2926	10077.9	7252.74	4604.51	3330.03	6230.98	-1.04161	0.351946	-2.95958	0.00308058	0.046978
ENSRNOG00000042603	TTC39B	chr5:105326436-105422721	2676	844.52	593.618	311.746	340.789	515.935	-1.05251	0.352564	-2.9853	0.00283297	0.044108
ENSRNOG00000008236	DECR1	chr5:34253235-34280749	1146	2592.36	1685.15	1022.92	908.394	1530.53	-1.05846	0.353447	-2.99467	0.00274738	0.0431565
ENSRNOG00000014090	RETSAT	chr4:165235747-165244511	1855	3505.7	2944.81	1427.21	1529.04	2321.43	-1.06322	0.308449	-3.44701	0.000566837	0.0126388
ENSRNOG00000003927	CD55	chr13:52179637-52206115	1836	1427.55	1893.37	712.562	795.55	1193.92	-1.06364	0.336916	-3.157	0.00159401	0.0283903
ENSRNOG00000046493	PNPO	chr10:84665835-84672099	2050	1746.59	1408.39	581.044	833.917	1127.7	-1.0684	0.353131	-3.0255	0.00248221	0.0400619
ENSRNOG00000018181	STK25	chr9:100277908-100433656	2003	5025.83	4338.97	2237.19	2016.52	3361.06	-1.0768	0.305548	-3.52417	0.000424804	0.010059
ENSRNOG00000036677	SLC16A3	chr10:109599918-109846748	2118	2599.87	1734.29	992.994	938.862	1545	-1.07952	0.346278	-3.11749	0.00182396	0.0313383
ENSRNOG00000019824	ELL	chr16:20449839-20497154	3067	2020.59	1373.47	839.209	668.037	1208.46	-1.07963	0.355834	-3.03408	0.00241269	0.0392089
ENSRNOG00000023376	RIOK3	chr18:3574640-3600214	3843	6980.11	4743.77	2687.42	2557.05	4184.07	-1.07964	0.338052	-3.1937	0.00140463	0.0256323
ENSRNOG00000020288	SLC25A20	chr8:116800145-116821558	1754	4681.77	3277.18	1798.8	1756.98	2839.75	-1.08371	0.333536	-3.24916	0.00115744	0.0223045
ENSRNOG00000033560	POLR3C	chr2:218323218-218339095	2365	2089.4	1255.78	758.489	704.147	1184.83	-1.09206	0.36815	-2.96634	0.00301371	0.0461579
ENSRNOG00000019768	NCOA4	chr16:8219982-8240323	3367	5857.84	3741.47	2265.72	1951.07	3406.02	-1.09392	0.354693	-3.08413	0.00204147	0.0342174
ENSRNOG00000000381	HERC4	chr20:8063830-8138835	3818	2133.19	1347.6	748.747	768.468	1232.16	-1.1026	0.357613	-3.08322	0.00204775	0.0342652
ENSRNOG00000017093	PXDC1	chr17:32865486-32893955	1787	3210.43	2077.01	1198.97	1104.74	1871.51	-1.10656	0.351447	-3.14858	0.00164065	0.0291107
ENSRNOG00000011517	TNFRSF21	chr9:19419627-19494259	4350	2093.16	2325.33	1008.3	955.789	1576.52	-1.1069	0.307566	-3.59892	0.000319546	0.00789407
ENSRNOG00000033101	MYO18A	chr10:66559667-66646100	6751	3738.41	2305.93	1262.99	1351.87	2134.55	-1.11078	0.359538	-3.08946	0.00200522	0.0337941
ENSRNOG00000042785	SESN2	chr5:154351309-154370252	2697	469.178	437.13	189.274	206.505	321.438	-1.113	0.337197	-3.30075	0.000964257	0.0190769
ENSRNOG00000001303	SPECC1L	chr20:16472452-16577173	4289	791.972	620.777	305.483	311.449	500.595	-1.11636	0.335427	-3.32819	0.000874134	0.0178377
ENSRNOG00000012375	INPP1	chr9:53229086-53240761	1616	1398.77	963.497	507.979	514.569	834.756	-1.11816	0.346164	-3.23015	0.00123723	0.0235844
ENSRNOG00000021817	IRAK2	chr4:208890973-208947452	2944	1696.55	1037.21	528.159	639.826	961.893	-1.1185	0.373417	-2.99531	0.00274168	0.043115
ENSRNOG00000015273	AK3	chr1:254383051-254408286	1087	4298.92	3608.26	1414.69	2015.39	2798	-1.11881	0.343072	-3.26116	0.00110957	0.0214995
ENSRNOG00000011032	LHFPL2	chr2:42942596-43023910	4254	1447.57	1646.35	774.493	568.734	1096.1	-1.12257	0.33999	-3.30178	0.000960724	0.0190769
ENSRNOG00000014872	SEC24D	chr2:246849787-246919956	2805	5209.75	3211.23	1798.11	1812.27	2965.74	-1.1244	0.357322	-3.14674	0.00165102	0.0292072
ENSRNOG00000020384	FAM13B	chr18:26904426-27002904	5030	6440.87	5045.1	2472.39	2518.68	4065.19	-1.13236	0.313432	-3.61276	0.000302958	0.00756375
ENSRNOG00000008713	SLC41A2	chr7:26651681-26734269	4470	1166.06	744.932	393.162	417.523	671.092	-1.13419	0.363337	-3.12159	0.00179877	0.031095
ENSRNOG00000011592	LRP10	chr15:36993826-36999985	2911	10324.4	7009.6	4022.77	3399.99	6104.63	-1.13485	0.343599	-3.30282	0.000957168	0.0190704
ENSRNOG00000000323	PRDM1	chr20:51096613-51188388	5166	665.607	581.978	260.252	277.596	440.825	-1.13561	0.329036	-3.45132	0.000557845	0.0125702
ENSRNOG00000001169	SLC37A1	chr20:12216551-12278026	2931	1121.02	646.642	356.977	383.67	618.362	-1.13663	0.383298	-2.96539	0.00302298	0.0462222
ENSRNOG00000020497	PLEKHA1	chr1:208462230-208513823	3653	2797.55	2069.26	1009.69	1078.79	1715.85	-1.1408	0.32813	-3.47666	0.000507697	0.0116071
ENSRNOG00000015225	GRAMD3	chr18:50688263-50786064	2531	4120.01	2851.69	1262.29	1688.15	2447.05	-1.14272	0.356474	-3.20561	0.00134777	0.0250997
ENSRNOG00000048932	SMAGP	chr7:140049629-140066357	1131	2666.18	1447.19	907.403	803.449	1434.75	-1.14389	0.387628	-2.95099	0.00316757	0.0481485
ENSRNOG00000012648	PPP1R14D	chr3:117573557-117587801	739	5132.18	2785.73	1700.68	1593.36	2762.61	-1.14607	0.383316	-2.98988	0.00279088	0.0435488
ENSRNOG00000001277	MAFK	chr12:18914796-18925513	2645	3568.25	2265.83	1237.24	1224.36	2045	-1.14856	0.353148	-3.25234	0.0011446	0.0221175
ENSRNOG00000042389	BCL10	chr2:270330539-270340108	1595	6096.81	3561.71	1803.67	2214	3371.06	-1.15187	0.37531	-3.06912	0.0021469	0.0355032
ENSRNOG00000021013	STX3	chr1:235218150-235262711	2631	1950.53	1158.78	622.1	673.679	1086	-1.15231	0.371605	-3.1009	0.00192935	0.0326324
ENSRNOG00000020546	LIPE	chr1:83511518-83530200	3704	1623.98	1157.49	698.645	457.018	970.914	-1.15421	0.376226	-3.06785	0.00215602	0.0355705
ENSRNOG00000003846	PITPNA	chr10:64232946-64273229	1639	20728.9	10830	6778.38	6218.83	10977	-1.15554	0.388188	-2.97675	0.00291322	0.0450097
ENSRNOG00000019120	HMGCS2	chr2:219928550-219954859	1994	872.045	883.313	445.351	290.009	614.862	-1.15605	0.36221	-3.19165	0.00141461	0.0257428
ENSRNOG00000016815	TMEM135	chr1:159198115-159407174	3395	1486.35	1213.1	514.241	629.67	948.343	-1.15643	0.331359	-3.48996	0.000483101	0.0111715
ENSRNOG00000021032	SPHK2	chr1:102771804-102776109	2382	4232.61	2841.35	1546.2	1426.35	2477.13	-1.16039	0.343238	-3.38071	0.000722995	0.0152505
ENSRNOG00000001804	ITPR2	chr4:244585711-244960183	10458	1000.91	576.805	352.802	293.394	548.087	-1.1627	0.390019	-2.98115	0.00287172	0.0446128
ENSRNOG00000010284	ST3GAL5	chr4:164713252-164769522	2698	2626.14	1972.26	1169.74	731.229	1603.03	-1.16309	0.374189	-3.10828	0.00188177	0.0320971
ENSRNOG00000005058	LPCAT4	chr3:110234005-110450999	2488	1837.93	1257.07	632.538	662.394	1082.59	-1.1649	0.344793	-3.37856	0.000728664	0.0153411
ENSRNOG00000024040	MB21D2	chr11:78476277-78575233	3071	1209.85	759.158	374.373	438.963	685.863	-1.16525	0.370771	-3.14277	0.00167355	0.0293986
ENSRNOG00000018359	SMAD7	chr18:70530558-70558925	4295	1740.34	1206.63	550.426	675.936	1029.18	-1.16767	0.352661	-3.31104	0.000929504	0.0186244
ENSRNOG00000032398	RGD1562136	chr9:110878883-110898591	2730	2898.89	1839.05	881.656	1077.66	1651.38	-1.16774	0.363323	-3.21406	0.00130872	0.0245489
ENSRNOG00000018282	GDA	chr1:246270808-246346023	1553	314.036	261.243	109.25	127.514	200.393	-1.17073	0.368824	-3.17422	0.0015024	0.0270663
ENSRNOG00000046143	PGAP3	chr10:86138992-86150849	2328	1849.19	937.631	562.256	556.321	961.978	-1.17957	0.401126	-2.94065	0.00327525	0.0494125
ENSRNOG00000028311	CNPY1	chr4:470883-477469	1199	1243.63	772.091	350.714	467.174	698.681	-1.17971	0.382529	-3.08399	0.00204247	0.0342174
ENSRNOG00000012178	LMBRD1	chr9:29762572-29854651	2548	3124.1	1846.81	985.339	1046.06	1725.85	-1.1803	0.368608	-3.20205	0.00136454	0.0252269
ENSRNOG00000033262	REEP6	chr7:12409854-12416524	2125	9172.11	4549.77	2782.75	2709.38	4732.9	-1.18473	0.398144	-2.97564	0.00292382	0.045124
ENSRNOG00000023628	TMEM106A	chr10:89282481-89291487	2376	4430.29	2485.69	1430.69	1371.05	2394.79	-1.18559	0.376618	-3.148	0.00164393	0.0291322
ENSRNOG00000004442	RGD1311756	chr6:134008150-134091103	3102	2704.97	1445.89	766.839	894.853	1432.32	-1.18914	0.39212	-3.03259	0.00242464	0.0393126
ENSRNOG00000008676	EMP1	chr4:233415323-233449254	2291	3531.97	2937.05	1222.63	1460.2	2258.62	-1.19275	0.318902	-3.74017	0.000183898	0.00509641
ENSRNOG00000008062	DQX1	chr4:178575608-178584448	2606	2453.49	1248.02	704.211	766.211	1273.89	-1.19357	0.399504	-2.98762	0.00281155	0.043823
ENSRNOG00000010960	ANKH	chr2:99796578-99921970	2458	960.876	1178.18	374.373	502.156	745.181	-1.19357	0.350729	-3.40312	0.000666216	0.0143039
ENSRNOG00000009280	MKRN1	chr4:66994931-67013389	1435	2644.91	1517.02	792.586	880.183	1438.07	-1.19569	0.376896	-3.17247	0.00151147	0.0271948
ENSRNOG00000000172	SQRDL	chr3:121438450-121477299	1594	7962.26	4575.64	2395.85	2656.35	4335.19	-1.19603	0.371967	-3.21541	0.00130257	0.0244988
ENSRNOG00000017993	ABCB10	chr19:67458447-67488456	3434	823.25	609.137	235.897	340.789	495.617	-1.19628	0.373593	-3.20211	0.00136426	0.0252269
ENSRNOG00000011066	MARCH6	chr2:104209951-104281884	2858	346.566	269.003	102.292	144.44	212.69	-1.19639	0.389866	-3.06873	0.00214971	0.035508
ENSRNOG00000000307	MICAL1	chr20:47892300-47904250	3536	5168.46	3230.62	1885.78	1513.24	2908.34	-1.19642	0.364352	-3.2837	0.00102454	0.0201283
ENSRNOG00000004973	PPP2R5C	chr6:143982520-144075381	1656	5855.34	2955.16	1722.95	1771.65	3031.26	-1.19787	0.396027	-3.02473	0.00248856	0.0401184
ENSRNOG00000024011	ANK3	chr20:22243055-22609934	6962	2305.85	1461.41	588.699	909.523	1298.4	-1.19845	0.39141	-3.06189	0.00219948	0.0362028
ENSRNOG00000009222	EPHA2	chr5:163558778-163586206	3801	1428.8	848.395	456.485	455.89	786.024	-1.20281	0.373985	-3.2162	0.001299	0.0244642
ENSRNOG00000010452	CYCS	chr4:145002163-145004305	1242	37334	18343.9	10733	11226.9	19124	-1.20299	0.398843	-3.0162	0.00255967	0.0409896
ENSRNOG00000006839	ARL5A	chr3:43024476-43046967	2714	2339.63	1280.35	677.769	759.44	1246.13	-1.20429	0.3871	-3.11106	0.00186416	0.0318351
ENSRNOG00000001762	PCYT1A	chr11:74632946-74676225	4300	2503.53	1861.04	858.693	926.449	1517.1	-1.20558	0.328743	-3.66724	0.00024518	0.00640464
ENSRNOG00000004276	ITGA3	chr10:82667993-82697897	3159	708.145	503.088	170.486	302.422	415.155	-1.20958	0.411577	-2.93889	0.00329395	0.0495885
ENSRNOG00000016636	LPIN3	chr3:163113544-163126527	3129	2696.21	1636	902.532	830.532	1495.23	-1.21009	0.365025	-3.31509	0.000916122	0.0184612
ENSRNOG00000014061	DUSP5	chr1:281658074-281671441	2374	890.812	516.021	248.422	305.807	483.331	-1.21032	0.393377	-3.07674	0.0020928	0.0348125
ENSRNOG00000033411	USP12	chr12:12145471-12195185	1113	367.835	218.565	108.554	119.615	201.135	-1.2107	0.40805	-2.96704	0.00300679	0.0461019
ENSRNOG00000007189	TTC22	chr5:130071414-130088219	2553	1324.96	675.095	410.558	367.871	684.589	-1.21407	0.405588	-2.99336	0.00275925	0.0432467
ENSRNOG00000030163	EPB41L4B	chr5:78259811-78344997	2067	3625.8	1996.83	876.089	1312.38	1924.94	-1.21507	0.405833	-2.99401	0.00275337	0.0432024
ENSRNOG00000036684	PCYT2	chr10:109381451-109388764	1844	7655.73	3693.62	2175.26	2244.47	3884.01	-1.21553	0.403881	-3.00962	0.00261572	0.0416919
ENSRNOG00000007422	VAV2	chr3:11173751-11337325	5164	3102.83	1789.91	885.135	1046.06	1681.88	-1.21898	0.377961	-3.22515	0.00125905	0.0239034
ENSRNOG00000042344	SMIM22	chr10:9533220-9534402	644	1710.31	810.889	470.402	499.899	859.813	-1.22114	0.415018	-2.94237	0.00325707	0.0491908
ENSRNOG00000009323	FAM214B	chr5:63002710-63010762	3017	3580.76	1969.67	1095.29	1086.69	1905.52	-1.22166	0.381227	-3.20454	0.00135277	0.0251082
ENSRNOG00000008356	MYO5C	chr8:81775088-81850114	5229	304.027	285.816	89.0702	141.055	202.483	-1.22293	0.397421	-3.07717	0.00208973	0.0348025
ENSRNOG00000009110	PSEN1	chr6:118325067-118373047	2833	2232.03	1973.55	852.43	862.128	1461.29	-1.22441	0.305474	-4.00822	6.11785e-05	0.00204498
ENSRNOG00000000221	ABHD5	chr8:130136516-130163114	1373	386.602	288.402	138.476	128.642	232.372	-1.2245	0.368695	-3.32117	0.000896416	0.0181494
ENSRNOG00000018279	SFXN1	chr17:13157816-13193253	2152	1975.55	1228.62	482.928	761.697	1097.15	-1.22456	0.397764	-3.07861	0.00207967	0.034676
ENSRNOG00000015460	TM4SF20	chr9:88268848-88282366	1538	15305.2	7270.85	4077.75	4622.09	7703.26	-1.2253	0.407765	-3.00492	0.00265652	0.0421991
ENSRNOG00000033693	NAIP6	chr2:49536672-49572335	5506	870.794	1066.96	343.755	433.321	671.035	-1.22607	0.344153	-3.56257	0.000367237	0.00891608
ENSRNOG00000009411	CHN2	chr4:149084635-149113928	1048	176.411	135.795	56.3648	64.3211	106.587	-1.22614	0.413096	-2.96817	0.00299582	0.0460338
ENSRNOG00000018145	CRAT	chr3:14320764-14334358	2728	5067.12	3031.46	1762.62	1425.22	2781.72	-1.22733	0.371766	-3.30134	0.000962243	0.0190769
ENSRNOG00000048462	AABR06058412.1	chr9:9779122-9781187	2065	451.662	327.201	138.476	168.138	267.637	-1.2295	0.373873	-3.28855	0.00100704	0.0198675
ENSRNOG00000011614	TMCC1	chr4:211205162-211332130	1950	255.233	232.791	84.1992	107.202	167.638	-1.23107	0.380176	-3.23815	0.00120306	0.0230263
ENSRNOG00000011885	RHPN2	chr1:92723894-92791055	3185	1261.15	691.907	293.653	449.119	664.398	-1.23503	0.416213	-2.96731	0.00300414	0.0461019
ENSRNOG00000018319	PISD	chr14:83999011-84034630	2040	3306.76	1636	946.371	951.275	1684.87	-1.23583	0.401969	-3.07445	0.00210891	0.0349581
ENSRNOG00000049162	PRR15L	chr10:84662588-84662891	303	555.506	305.215	152.394	176.037	292.996	-1.23865	0.410426	-3.01796	0.00254487	0.040886
ENSRNOG00000016560	RGD1306058	chr17:17916364-17922567	840	1969.29	1077.31	675.681	490.871	1038.05	-1.23931	0.40157	-3.08616	0.00202757	0.0340892
ENSRNOG00000034134	CPM	chr7:60654167-60714583	5450	1824.16	1219.57	487.799	697.376	1042.91	-1.23974	0.375108	-3.30501	0.000949718	0.0189487
ENSRNOG00000028319	CRYZ	chr2:279546016-279573472	1901	489.196	351.773	180.228	147.826	288.326	-1.24109	0.371361	-3.34199	0.000831798	0.017129
ENSRNOG00000015840	HSD17B4	chr18:44032346-44119545	2584	8816.79	4315.69	2405.59	2603.31	4468.76	-1.24392	0.401673	-3.09685	0.00195587	0.0330018
ENSRNOG00000014311	SLC7A8	chr15:37253914-37317161	4095	8141.17	4273.01	2327.66	2437.43	4232.53	-1.2472	0.38796	-3.21477	0.00130551	0.0245213
ENSRNOG00000013766	ACAA2	chr18:69873083-69901836	1615	8747.97	5421.45	2777.18	2763.55	4858.89	-1.24782	0.354887	-3.51611	0.000437919	0.0102955
ENSRNOG00000015055	SCG2	chr9:84991743-84997049	2291	556.757	404.798	174.661	199.734	329.801	-1.24821	0.361869	-3.44933	0.000561975	0.0126029
ENSRNOG00000020904	CDC42EP2	chr1:228203834-228212662	1366	3336.79	1612.73	1023.61	842.945	1679	-1.25043	0.411137	-3.04139	0.0023549	0.0384224
ENSRNOG00000018158	TMEM181	chr1:48465873-48505759	1854	1583.94	860.034	457.181	477.33	832.364	-1.25124	0.390353	-3.2054	0.00134876	0.0250997
ENSRNOG00000012179	LOC100909619	chr1:63107002-63118858	2258	6384.57	2851.69	1821.76	1636.24	3125.96	-1.25171	0.419769	-2.98191	0.00286457	0.0445508
ENSRNOG00000023238	DGKD	chr9:94730642-94790627	5522	5053.36	3102.59	1463.4	1701.69	2790.86	-1.25212	0.363165	-3.44781	0.000565158	0.0126388
ENSRNOG00000011929	ABCD3	chr2:243374198-243409607	3167	5080.88	2740.47	1356.93	1628.34	2662.7	-1.25365	0.38919	-3.22117	0.00127669	0.0241407
ENSRNOG00000002185	PGM2	chr14:45635118-45669788	2103	7863.42	3357.37	2199.62	1953.33	3784.81	-1.25857	0.427602	-2.94332	0.00324712	0.0490931
ENSRNOG00000011886	MYO1E	chr8:76241675-76323566	3647	1188.58	1250.61	446.743	517.954	841.086	-1.25895	0.318383	-3.9542	7.67924e-05	0.0024675
ENSRNOG00000005528	TBK1	chr7:63877566-63910298	2987	3600.78	1929.58	982.556	1113.77	1879.55	-1.26245	0.389029	-3.24513	0.00117399	0.0225616
ENSRNOG00000009244	ABHD4	chr15:36705477-36717401	2399	5742.73	3370.3	1901.09	1588.84	3106.16	-1.26284	0.372547	-3.38973	0.000699614	0.0149075
ENSRNOG00000000047	CD82	chr3:89026123-89070127	1810	13559.9	8317.11	4500.83	3936	7472.51	-1.26306	0.3597	-3.51143	0.000445706	0.0104611
ENSRNOG00000020640	ZBTB7B	chr2:208119627-208121619	1623	1497.61	887.193	356.281	539.394	808.537	-1.2653	0.402129	-3.14651	0.0016523	0.0292072
ENSRNOG00000001599	RWDD2B	chr11:30711158-30719812	2145	2430.97	1426.49	696.557	776.367	1313.73	-1.26548	0.373493	-3.38823	0.000703456	0.0149442
ENSRNOG00000018168	KLC4	chr9:15554536-15568069	2565	6756.16	2971.97	1762.62	1832.59	3280.79	-1.26617	0.421302	-3.00537	0.00265256	0.0421838
ENSRNOG00000011136	OSR2	chr7:74213950-74221075	1708	1307.44	610.43	336.101	367.871	645.507	-1.27451	0.42159	-3.02311	0.00250194	0.0402881
ENSRNOG00000018736	PNPLA2	chr1:221351749-221356832	2231	3783.45	1797.67	1156.52	900.495	1881.08	-1.27491	0.416705	-3.0595	0.00221708	0.03645
ENSRNOG00000027871	RAPGEFL1	chr10:86545852-86561330	3745	798.228	450.063	225.459	241.486	422.403	-1.27824	0.39443	-3.24072	0.00119227	0.0228509
ENSRNOG00000019199	CRACR2B	chr1:221357614-221362986	1583	1183.58	724.239	372.982	348.688	648.311	-1.27914	0.37198	-3.43874	0.00058443	0.0129419
ENSRNOG00000011245	ARHGAP18	chr1:20730431-20879837	2285	4685.52	2573.64	1505.84	1211.94	2458.61	-1.28015	0.388091	-3.29857	0.000971776	0.0191987
ENSRNOG00000011116	SNX25	chr16:49076061-49159354	2972	2612.38	1169.13	613.054	761.697	1269.69	-1.28094	0.427507	-2.99629	0.00273286	0.0430723
ENSRNOG00000009653	NUMB	chr6:118218524-118262951	1816	801.981	602.671	236.593	299.037	478.866	-1.28113	0.355753	-3.60118	0.000316772	0.00785304
ENSRNOG00000014443	PDE5A	chr2:246262029-246402956	3397	311.534	168.127	86.2868	88.0183	161.146	-1.28157	0.432197	-2.96524	0.00302447	0.0462222
ENSRNOG00000018159	ANXA4	chr4:183108905-183164898	1956	40399.3	20924	10829.7	12034.8	20741.5	-1.28298	0.390235	-3.28771	0.00101007	0.0198995
ENSRNOG00000002258	TMEM150C	chr14:11093498-11110144	2710	360.328	346.6	144.043	126.385	241.244	-1.2848	0.35133	-3.65697	0.000255213	0.00664214
ENSRNOG00000016581	SERPINB1A	chr17:34796324-34803701	1251	30679.2	14149.8	8649.55	7797.52	15090.2	-1.28482	0.411802	-3.12	0.00180851	0.031161
ENSRNOG00000005061	DLST	chr6:116597172-116620312	2779	13222.1	6850.53	3469.56	3942.77	6771.81	-1.29407	0.391882	-3.30219	0.000959342	0.0190769
ENSRNOG00000027623	LOC680039	chr14:78899824-78964642	6715	2785.04	2011.06	947.067	882.44	1634.1	-1.29707	0.332486	-3.90112	9.57468e-05	0.00294249
ENSRNOG00000003745	ATF3	chr13:114411694-114443438	1894	1722.82	1282.94	671.506	454.761	1019.48	-1.2978	0.3655	-3.55074	0.000384143	0.00924696
ENSRNOG00000030445	ORMDL3	chr10:86343414-86350554	543	299.023	200.459	64.0192	112.844	166.72	-1.30077	0.440884	-2.95036	0.00317403	0.0481947
ENSRNOG00000046472	ARFGAP3	chr7:124136868-124149920	1702	6281.98	3138.8	1799.5	1644.14	3169.03	-1.30146	0.398756	-3.26381	0.00109925	0.0213288
ENSRNOG00000004084	FAM84A	chr6:48123854-48128328	3719	1147.3	697.08	231.026	428.807	617.339	-1.30193	0.428096	-3.04121	0.00235629	0.0384224
ENSRNOG00000003781	ATP10B	chr10:28527557-28704605	4419	227.708	213.392	61.9316	98.1743	148.408	-1.30323	0.411475	-3.16721	0.00153909	0.0275863
ENSRNOG00000047322	CRB3	chr9:8981382-8984483	1093	2603.62	1079.89	608.183	697.376	1228.23	-1.30373	0.437473	-2.98014	0.0028812	0.0446618
ENSRNOG00000008463	RUNDC3B	chr4:22380550-22593670	3595	187.671	120.275	49.4061	59.8073	102.817	-1.30555	0.439025	-2.97374	0.00294191	0.0453536
ENSRNOG00000012204	LOC100294508	chr5:148550211-148642557	4269	7794.6	3656.12	2045.83	2088.74	3838.57	-1.30762	0.409141	-3.19602	0.00139337	0.0254927
ENSRNOG00000011019	FAAH	chr5:138120674-138139527	3526	4018.66	1837.76	1030.57	1073.15	1960.5	-1.30778	0.416028	-3.14349	0.00166944	0.0293986
ENSRNOG00000016629	ZCCHC6	chr17:7452314-7504093	4458	898.319	951.857	295.741	400.596	629.213	-1.30823	0.343751	-3.80576	0.000141369	0.0040697
ENSRNOG00000001275	TMEM184A	chr12:18904349-18912233	1826	2339.63	1367	592.178	767.339	1248.7	-1.3103	0.384442	-3.40833	0.000653625	0.0141412
ENSRNOG00000015501	DDHD2	chr16:70751369-70779434	2100	160.146	139.675	48.7103	58.6789	100.718	-1.31163	0.412862	-3.17693	0.00148844	0.0268491
ENSRNOG00000017601	SRD5A1	chr1:37717524-37751715	2614	1827.92	1056.61	445.351	603.715	969.65	-1.31397	0.392804	-3.3451	0.000822536	0.016963
ENSRNOG00000008471	KIF21B	chr13:58030723-58076237	5206	255.233	134.502	70.9778	65.4495	129.597	-1.31551	0.446207	-2.94821	0.00319622	0.0484794
ENSRNOG00000015518	RBP4	chr1:264287000-264294216	917	261.488	162.954	80.7199	69.9633	141.752	-1.31739	0.419571	-3.13985	0.00169035	0.0296497
ENSRNOG00000011284	SGMS2	chr2:255006745-255028969	1894	628.072	358.24	176.749	179.422	330.737	-1.31914	0.397654	-3.31732	0.000908869	0.0183412
ENSRNOG00000025269	SLC25A44	chr2:207174511-207189211	3678	1862.95	1298.46	648.543	524.725	1069.09	-1.31958	0.351629	-3.75276	0.000174896	0.00486605
ENSRNOG00000017610	NEDD4L	chr18:59776171-59921504	4067	2209.51	1346.31	653.414	656.752	1199.51	-1.31965	0.364877	-3.61671	0.000298375	0.0074758
ENSRNOG00000009571	WIPF3	chr4:149287015-149335996	3682	356.575	215.979	96.0288	109.459	191.786	-1.32101	0.409031	-3.22961	0.00123961	0.0235977
ENSRNOG00000010423	MISP	chr7:12711158-12963915	2571	7948.49	5096.83	2364.54	2473.54	4409.42	-1.32219	0.349025	-3.78823	0.000151724	0.00429763
ENSRNOG00000003038	SFT2D2	chr13:88318212-88337472	414	4731.81	3101.3	1294.3	1594.49	2643.65	-1.32522	0.356121	-3.72127	0.000198223	0.00540837
ENSRNOG00000010883	PARD6B	chr3:170968974-170990259	3294	1448.82	646.642	326.359	406.238	696.403	-1.32657	0.432987	-3.06376	0.00218575	0.036019
ENSRNOG00000005903	ST14	chr8:32266158-32305925	3156	14149.1	5289.53	3113.28	3555.71	6425.32	-1.32996	0.449744	-2.95715	0.00310495	0.0472986
ENSRNOG00000016346	PRKCD	chr16:6588978-6608725	2716	5003.31	2951.28	1362.5	1536.94	2675.12	-1.33012	0.369249	-3.60223	0.000315502	0.00783533
ENSRNOG00000010896	TPRN	chr3:2461644-2469118	2726	3460.65	1870.09	940.108	980.614	1786.93	-1.33169	0.385424	-3.45514	0.00055	0.0124133
ENSRNOG00000019674	TMEM180	chr1:273536064-273553299	2035	1731.58	1091.53	559.472	470.56	950.129	-1.33213	0.366355	-3.63618	0.000276714	0.00703301
ENSRNOG00000010812	OSBPL6	chr3:69952407-70024414	3602	1218.61	616.897	287.391	361.101	611.956	-1.33265	0.413986	-3.21907	0.00128608	0.0242786
ENSRNOG00000012683	ABHD17C	chr1:147177237-147218200	2177	7697.02	4141.1	1754.96	2463.38	3956.49	-1.33286	0.400727	-3.32609	0.000880735	0.0179273
ENSRNOG00000008543	PDLIM2	chr15:55569717-55581479	1528	1887.97	870.38	581.044	371.257	913.563	-1.33384	0.440859	-3.02554	0.0024819	0.0400619
ENSRNOG00000018297	OCLN	chr2:49686709-49736838	4150	4718.05	2846.52	1117.55	1600.13	2534.98	-1.33581	0.38552	-3.46496	0.000530303	0.0120349
ENSRNOG00000004657	SEC23A	chr6:89586787-89633108	2485	690.629	588.444	137.781	304.679	425.107	-1.33805	0.435218	-3.07444	0.00210899	0.0349581
ENSRNOG00000004743	CDCP1	chr8:131412947-131449580	5232	2404.69	1297.16	599.832	719.945	1237.48	-1.33867	0.393226	-3.40433	0.00066327	0.0142623
ENSRNOG00000016650	SLC30A2	chr5:156318530-156368724	3088	606.803	495.328	210.15	196.349	372.136	-1.33869	0.34077	-3.92843	8.5503e-05	0.00270869
ENSRNOG00000016539	RAB24	chr17:11943924-11949132	1497	7624.45	4426.91	2313.74	2040.22	4043.17	-1.34053	0.37089	-3.61436	0.000301089	0.00753042
ENSRNOG00000030616	SLC25A45	chr1:228170601-228176797	871	306.529	183.646	82.8075	89.1468	163.43	-1.34118	0.416235	-3.22217	0.00127222	0.0240885
ENSRNOG00000012428	MAF	chr19:58998440-58999550	1110	289.013	294.869	72.3696	132.027	194.663	-1.343	0.421054	-3.18962	0.00142462	0.0258632
ENSRNOG00000006556	SLC5A6	chr6:36500813-36512084	3064	3074.05	1500.21	828.075	782.009	1523.2	-1.34407	0.40554	-3.31426	0.000918855	0.0184655
ENSRNOG00000004332	EGFR	chr14:100438986-100617315	4158	118.858	109.929	40.3599	39.4954	76.0474	-1.34751	0.431785	-3.12078	0.00180371	0.0311422
ENSRNOG00000010238	CHMP4C	chr2:113334159-113397419	1591	5348.62	2580.1	1385.46	1399.27	2638.68	-1.3477	0.404906	-3.32843	0.000873361	0.0178377
ENSRNOG00000022781	CCSER2	chr16:13981316-14070911	3216	437.899	253.484	150.306	84.633	228.199	-1.35026	0.444035	-3.04089	0.00235884	0.0384224
ENSRNOG00000002839	SLC19A2	chr13:87436625-87450479	3178	715.652	450.063	164.223	244.871	388.335	-1.35175	0.403169	-3.35281	0.000799943	0.0165941
ENSRNOG00000015895	B4GALT6	chr18:15258329-15300179	4768	4212.59	2450.77	1171.83	1216.46	2231.05	-1.35182	0.370047	-3.65309	0.000259098	0.00673083
ENSRNOG00000000515	MAPK13	chr20:8272097-8280990	1661	6208.16	3096.12	1353.45	1883.37	3089.25	-1.35203	0.413128	-3.27266	0.00106539	0.0207288
ENSRNOG00000038212	SOCS6	chr18:85006284-85007928	1605	920.839	509.554	182.316	308.064	473.438	-1.3545	0.430948	-3.14307	0.00167187	0.0293986
ENSRNOG00000005506	ARHGEF5	chr4:137420813-137437155	4686	579.278	446.183	142.652	220.046	342.493	-1.3551	0.386693	-3.50433	0.000457758	0.0107099
ENSRNOG00000018780	SH3RF2	chr18:36038468-36138307	2413	455.415	243.137	132.214	108.33	231.108	-1.35638	0.424463	-3.19552	0.00139578	0.0255037
ENSRNOG00000013474	CASZ1	chr5:169401537-169425050	5282	417.881	341.427	121.776	150.083	254.444	-1.35847	0.363921	-3.73288	0.000189303	0.00522564
ENSRNOG00000045531	RAB11FIP1	chr16:68742618-68753634	6178	5580.09	2978.43	1325.62	1675.73	2848.45	-1.35887	0.394235	-3.44685	0.000567159	0.0126388
ENSRNOG00000004414	F11R	chr13:94383717-94501245	1867	7635.71	3639.3	1818.29	2094.38	3740.61	-1.35904	0.40895	-3.32323	0.000889802	0.0180598
ENSRNOG00000002478	INSIG2	chr13:42366078-42388541	2449	1198.59	844.515	335.405	400.596	685.697	-1.35918	0.353283	-3.84727	0.000119439	0.00353951
ENSRNOG00000017325	CLDN7	chr10:56321560-56323745	1117	23456.4	10286.8	5655.26	5943.49	11164.3	-1.35977	0.420221	-3.23586	0.00121279	0.023181
ENSRNOG00000024259	TMEM54	chr5:151023460-151029951	1043	6299.49	3644.48	1845.42	1689.27	3321.53	-1.36216	0.3707	-3.67456	0.000238264	0.00627043
ENSRNOG00000015667	EPCAM	chr6:21264137-21280102	1462	63738.1	28514.3	13670.2	17867.7	30484.1	-1.36225	0.424464	-3.20933	0.00133043	0.0248241
ENSRNOG00000028641	BRPF3	chr20:8307921-8337553	3677	132.621	128.035	38.2724	50.7798	86.4378	-1.36313	0.430884	-3.16356	0.0015585	0.0278281
ENSRNOG00000020714	TRPM4	chr1:102357042-102386710	4203	6550.97	3090.95	1695.12	1640.75	3196.29	-1.36317	0.408535	-3.33673	0.000847698	0.017431
ENSRNOG00000012269	LPCAT3	chr4:224199924-224248243	1903	11759.5	4090.66	2483.53	2727.44	5182.23	-1.36952	0.460729	-2.9725	0.00295387	0.0454884
ENSRNOG00000003749	XK	chrX:15278808-15315163	3610	694.383	337.547	137.085	207.633	339.205	-1.37017	0.443674	-3.08823	0.00201349	0.033893
ENSRNOG00000019112	CHP2	chr1:199230967-199233950	1053	4358.97	2339.55	1137.04	1199.53	2226.48	-1.37324	0.386167	-3.55607	0.000376438	0.00910813
ENSRNOG00000022624	MROH7	chr5:130128909-130167347	4049	324.045	166.834	92.5495	69.9633	161.112	-1.37521	0.447684	-3.07184	0.00212743	0.0352225
ENSRNOG00000001962	FAM3B	chr11:41429762-41503454	799	3705.88	1899.83	957.505	981.743	1859.03	-1.37574	0.394998	-3.48291	0.000495987	0.0113763
ENSRNOG00000020517	PRRG2	chr1:102112489-102119928	779	335.306	157.781	73.0654	89.1468	161.325	-1.37673	0.456323	-3.01701	0.00255278	0.0409664
ENSRNOG00000015591	CNDP2	chr18:80566928-80584026	2088	35929	11913.7	8281.44	7208.48	15579.5	-1.37933	0.46792	-2.94779	0.00320057	0.0484932
ENSRNOG00000018808	VIP	chr1:43498383-43506462	1498	1299.93	690.614	305.483	376.899	658.631	-1.38115	0.403543	-3.42257	0.000620328	0.0135541
ENSRNOG00000042094	PRR13	chr7:141857063-141860364	771	6151.86	3749.23	1649.19	1825.82	3297.42	-1.38607	0.361511	-3.8341	0.000126026	0.00371133
ENSRNOG00000012286	IL20RA	chr1:16728323-16770911	2065	1931.76	986.776	450.222	543.908	964.029	-1.38693	0.405252	-3.42239	0.000620724	0.0135541
ENSRNOG00000026965	TMEM140	chr4:62112722-62123502	1152	803.232	607.844	276.953	220.046	470.706	-1.38838	0.354566	-3.91573	9.01322e-05	0.00282535
ENSRNOG00000020836	RORC	chr2:215109108-215116316	1806	1622.73	741.052	459.268	324.991	775.168	-1.38975	0.435475	-3.19134	0.00141617	0.0257428
ENSRNOG00000007496	MTMR4	chr10:75192506-75215438	5683	4410.27	2587.86	1114.07	1314.63	2323.63	-1.39109	0.373235	-3.72711	0.00019369	0.0053259
ENSRNOG00000005130	OGDH	chr14:87307374-87523225	4089	29765.9	14951.7	7891.07	7372.1	14775.6	-1.39355	0.395053	-3.52751	0.000419493	0.00999554
ENSRNOG00000018567	SLC20A1	chr3:128276542-128289618	2853	7455.55	4122.99	2211.45	1759.24	3831.48	-1.39654	0.385917	-3.61876	0.000296022	0.00743005
ENSRNOG00000007060	PLIN2	chr5:108985562-108999161	1834	6397.08	6039.64	2452.21	2005.24	4171.32	-1.39704	0.309974	-4.50694	6.57686e-06	0.000308243
ENSRNOG00000025245	RGD1311946	chr1:225819323-225828032	2062	4251.37	2281.35	1131.47	1101.36	2159.43	-1.40045	0.386021	-3.62792	0.000285713	0.00719692
ENSRNOG00000017210	SLC22A23	chr17:33132226-33298110	6657	1912.99	1008.76	413.342	567.605	961.702	-1.40187	0.408758	-3.42959	0.00060449	0.0132612
ENSRNOG00000010667	EPT1	chr6:37285871-37297956	1943	925.844	421.611	171.878	264.055	439.362	-1.40412	0.449595	-3.12308	0.00178971	0.0310143
ENSRNOG00000019462	PCDH1	chr18:31017454-31023632	3054	1085.99	641.469	263.036	323.862	570.391	-1.40631	0.38759	-3.62834	0.000285249	0.00719692
ENSRNOG00000028353	SOX13	chr13:55487560-55532516	3563	2519.8	1432.96	726.479	622.899	1306.64	-1.4068	0.381206	-3.69039	0.000223912	0.00592589
ENSRNOG00000002142	CDS1	chr14:9356229-9418464	3728	10351.9	4967.51	2221.19	2879.78	5030.01	-1.40749	0.413327	-3.40527	0.000660976	0.0142347
ENSRNOG00000047005	KCNK5	chr15:8654577-8696346	3464	2523.55	1251.9	596.353	665.78	1241.04	-1.41091	0.405247	-3.48161	0.000498402	0.0114131
ENSRNOG00000006068	TMEM117	chr7:135545199-136048699	1545	355.324	332.374	64.7151	154.596	224.005	-1.41092	0.45737	-3.08485	0.00203652	0.0341989
ENSRNOG00000023411	VSIG10L	chr1:99538137-99544067	2538	284.009	239.258	78.6323	99.3027	173.029	-1.41181	0.381818	-3.6976	0.000217645	0.0058036
ENSRNOG00000020014	MYH14	chr1:101674361-101737053	6443	26794.4	13062.2	6895.29	6459.19	13106.3	-1.41204	0.400759	-3.52342	0.000426013	0.010059
ENSRNOG00000047821	SMLR1	chr1:22337120-22358779	563	1790.38	738.465	408.471	411.881	824.193	-1.41206	0.439604	-3.21213	0.00131755	0.024645
ENSRNOG00000011994	PERP	chr1:15786755-15799199	1869	9661.31	4662.29	2138.38	2629.27	4702.2	-1.41211	0.409286	-3.45019	0.000560191	0.0125829
ENSRNOG00000042152	GIPC2	chr2:275974532-276053051	963	2654.92	1425.2	604.703	766.211	1343.19	-1.41216	0.396884	-3.55811	0.000373529	0.00905327
ENSRNOG00000000729	TMLHE	chr20:231288-279025	1376	2637.4	1286.82	676.377	631.926	1288.71	-1.41299	0.406721	-3.4741	0.000512572	0.0116807
ENSRNOG00000009005	SLCO2A1	chr8:110886313-110967442	2739	302.776	409.971	110.642	132.027	236.408	-1.41446	0.38042	-3.71816	0.000200683	0.0054544
ENSRNOG00000005970	LRRC1	chr8:84292833-84406002	1910	330.301	329.788	80.024	138.798	217.131	-1.42071	0.408732	-3.4759	0.000509136	0.0116212
ENSRNOG00000017889	SERAC1	chr1:48241865-48275927	1878	404.118	210.805	82.8075	115.101	200.318	-1.4209	0.440842	-3.22316	0.00126784	0.0240379
ENSRNOG00000007561	GLB1L2	chr8:27827459-27872964	2436	172.657	129.328	31.3138	63.1926	97.7117	-1.42181	0.474421	-2.99694	0.00272705	0.0430289
ENSRNOG00000016791	CHKA	chr1:225950375-225998825	2530	3136.61	1994.24	919.928	838.431	1698.46	-1.42269	0.356003	-3.99628	6.43455e-05	0.0021407
ENSRNOG00000003400	FMO4	chr13:85580299-85598234	2088	2965.2	1158.78	617.925	697.376	1338.74	-1.42505	0.446513	-3.19151	0.00141533	0.0257428
ENSRNOG00000019687	ART2B	chr1:172857746-172867469	1542	689.378	275.47	157.265	145.569	311.864	-1.42721	0.459434	-3.10645	0.00189352	0.0321419
ENSRNOG00000014104	MYO5B	chr18:69568404-69866976	6083	2862.61	1341.14	649.238	726.715	1374.28	-1.42765	0.415062	-3.43962	0.000582536	0.0129406
ENSRNOG00000031782	COL6A4	chr8:114039957-114137875	6923	1542.66	722.946	261.644	455.89	734.986	-1.42806	0.450995	-3.16648	0.00154297	0.0276106
ENSRNOG00000001742	CLCN2	chr11:86955811-86969312	3128	1770.36	663.455	402.904	363.358	787.246	-1.4284	0.456698	-3.12766	0.00176202	0.0307231
ENSRNOG00000003367	TMEM220	chr10:53322012-53330915	1074	511.716	289.696	120.384	143.312	262.478	-1.43093	0.410389	-3.48676	0.000488912	0.0112505
ENSRNOG00000009715	ME1	chr8:93769077-93863618	3006	12579	4241.97	2713.16	2509.65	5423.07	-1.43404	0.465198	-3.08264	0.00205173	0.0342911
ENSRNOG00000025155	LMTK2	chr12:14461530-14592856	8223	2085.65	1286.82	498.932	633.055	1110.66	-1.4346	0.374352	-3.83223	0.000126989	0.00373188
ENSRNOG00000017512	ALDH3B1	chr1:226018063-226038888	1861	818.246	519.9	262.34	180.55	439.08	-1.43485	0.394883	-3.63361	0.000279484	0.00707793
ENSRNOG00000015679	DOK4	chr19:10558224-10568895	1522	584.283	406.091	162.136	171.523	326.552	-1.43532	0.366302	-3.9184	8.91377e-05	0.00280039
ENSRNOG00000020562	SLC22A18	chr1:223537695-223560895	1468	2853.85	1246.73	651.326	670.293	1335.02	-1.43611	0.426098	-3.37039	0.000750622	0.0156846
ENSRNOG00000002342	ALDH3A2	chr10:47300330-47320877	2977	11664.4	4858.87	2404.9	2880.91	5369.19	-1.43625	0.433476	-3.31332	0.000921941	0.0184991
ENSRNOG00000018775	CYSTM1	chr18:28878686-28939398	770	14330.6	6770.34	3315.78	3581.67	6895.94	-1.4368	0.40762	-3.52485	0.000423718	0.010059
ENSRNOG00000002139	RGD1311575	chr14:33440562-33469053	6294	3538.22	1206.63	590.09	858.743	1523.98	-1.43797	0.476934	-3.01502	0.00256963	0.0410966
ENSRNOG00000020952	CGN	chr2:215388584-215407679	3582	902.072	681.561	180.228	337.404	518.427	-1.43823	0.410577	-3.50294	0.000460157	0.0107289
ENSRNOG00000038202	CALML4	chr8:67482025-67494105	896	19465.2	7290.24	4227.36	4192.15	8656.18	-1.44033	0.44748	-3.21877	0.00128742	0.0242786
ENSRNOG00000046289	LOC100361052	chr3:22180348-22180872	369	168.904	249.604	57.0606	77.8624	137.057	-1.44114	0.427638	-3.37001	0.000751651	0.0156846
ENSRNOG00000007331	RRAGD	chr5:52808852-52844544	1443	1060.97	562.579	212.934	311.449	529.288	-1.44127	0.419952	-3.43198	0.000599189	0.0131848
ENSRNOG00000019598	VEGFA	chr9:16232414-16247655	3471	3501.94	2790.91	970.726	1188.25	2085.76	-1.4431	0.32718	-4.41072	1.03027e-05	0.000451335
ENSRNOG00000017202	MYZAP	chr8:74980450-75067085	2189	1591.45	1096.71	448.83	462.66	887.87	-1.44387	0.345777	-4.17571	2.97059e-05	0.00110591
ENSRNOG00000033824	GPD2	chr3:48327067-48426568	2312	322.794	150.021	65.4109	81.2477	152.45	-1.44595	0.462474	-3.12655	0.00176868	0.0307276
ENSRNOG00000021381	CCDC68	chr18:67564699-67626011	1381	1209.85	556.112	246.335	314.835	573.087	-1.44702	0.432191	-3.34811	0.000813659	0.0168291
ENSRNOG00000050445	GDE1	chr1:195338335-195350223	954	3614.54	1782.15	840.6	910.651	1761.01	-1.45011	0.403486	-3.59395	0.000325699	0.008018
ENSRNOG00000042326	SMPDL3B	chr5:154592755-154614208	1894	2430.97	922.112	503.108	538.266	1081.4	-1.45171	0.451806	-3.21313	0.00131297	0.024596
ENSRNOG00000002121	LRRC8D	chr14:5077923-5093047	3148	2751.26	1542.89	692.382	724.459	1407.18	-1.45245	0.379878	-3.82346	0.000131591	0.00382726
ENSRNOG00000017282	TESK2	chr5:139370346-139459589	3026	1334.97	786.317	374.373	324.991	695.065	-1.45295	0.380781	-3.81571	0.000135793	0.0039252
ENSRNOG00000007728	GSDMD	chr7:116782279-116786869	1704	11474.2	5872.8	3201.66	2421.63	5658.77	-1.45304	0.402829	-3.60709	0.000309651	0.0077036
ENSRNOG00000013468	FAM213B	chr5:175760761-175763365	807	4499.1	1678.68	1055.62	848.587	1989.08	-1.4564	0.455013	-3.20079	0.00137053	0.0252683
ENSRNOG00000022237	GARNL3	chr3:17370764-17488893	3398	1349.98	875.554	377.853	362.229	731.331	-1.46014	0.359321	-4.0636	4.83225e-05	0.0016666
ENSRNOG00000031090	RT1-CE7	chr20:6718906-6779286	1095	530.483	737.172	277.649	106.073	408.28	-1.46554	0.470572	-3.11438	0.00184333	0.0316326
ENSRNOG00000004341	LOC498222	chr13:52543254-52556096	2866	1472.59	874.26	384.115	384.798	768.068	-1.46574	0.374729	-3.91148	9.17319e-05	0.00284954
ENSRNOG00000048834	PLIN3	chr9:9761438-9773323	1922	21428.3	9007.73	5073.52	4465.24	9841.18	-1.46725	0.429294	-3.41782	0.000631247	0.0137413
ENSRNOG00000015187	ACOT8	chr3:167446048-167472950	1478	1412.54	728.119	354.193	331.761	696.464	-1.46783	0.40299	-3.64234	0.000270176	0.00688007
ENSRNOG00000018059	IHH	chr9:81977483-81983701	2272	3444.39	1435.55	719.52	794.422	1574.12	-1.474	0.434353	-3.39355	0.000689919	0.0147454
ENSRNOG00000006025	LAMB3	chr13:116587120-116628793	4068	392.858	257.364	67.4985	132.027	209.38	-1.4747	0.449191	-3.283	0.00102708	0.0201502
ENSRNOG00000003260	NR1I3	chr13:94213147-94218142	1562	1709.06	503.088	315.921	323.862	701.339	-1.4789	0.492729	-3.00145	0.00268696	0.0424913
ENSRNOG00000000437	AGPAT1	chr20:6450324-6459956	2091	10216.8	4661	2561.46	2100.03	4811.45	-1.48025	0.418408	-3.53782	0.000403446	0.00964579
ENSRNOG00000049665	AABR06007110.1	chr1:154731974-154737611	1116	8021.06	3493.16	1917.79	1664.45	3716.82	-1.48174	0.424891	-3.48734	0.000487844	0.0112443
ENSRNOG00000028781	ABCC6	chr1:103042749-103096453	5775	1876.71	977.723	389.682	510.055	925.189	-1.48423	0.407246	-3.64454	0.000267872	0.00688007
ENSRNOG00000022932	SERHL2	chr7:123946389-123972838	2493	593.041	280.643	138.476	130.899	281.508	-1.48494	0.434227	-3.41974	0.00062682	0.013666
ENSRNOG00000030142	HIST1H4B	chr17:58943974-58948418	1296	3373.07	2355.07	989.515	899.367	1878.65	-1.48745	0.338521	-4.39398	1.11296e-05	0.000486048
ENSRNOG00000003813	KCNK10	chr6:131633745-131760720	3057	529.232	222.445	101.596	121.872	240.041	-1.48995	0.460777	-3.23355	0.00122262	0.0233373
ENSRNOG00000017882	CAMK1D	chr17:78187613-78591805	4438	349.068	196.579	66.1068	100.431	175.486	-1.49117	0.442299	-3.37141	0.000747848	0.0156651
ENSRNOG00000009239	ENTPD8	chr3:2271696-2280857	1744	1755.35	999.709	384.115	490.871	894.68	-1.49143	0.390675	-3.81758	0.000134764	0.00390347
ENSRNOG00000005016	TMED4	chr14:87307374-87523225	1590	5030.84	2951.28	1027.09	1501.95	2590.98	-1.49294	0.392453	-3.80411	0.000142313	0.00408852
ENSRNOG00000009719	C2CD2L	chr8:47259703-47269967	3335	4714.3	2593.04	1114.07	1216.46	2374.83	-1.49446	0.381804	-3.91419	9.07072e-05	0.00282783
ENSRNOG00000012685	ADCK1	chr6:120923361-121019893	2080	588.036	288.402	112.73	151.211	280.822	-1.50666	0.438099	-3.43908	0.000583704	0.0129419
ENSRNOG00000020470	SLC25A24	chr2:231401403-231438472	3433	6960.09	4054.45	1647.8	1850.64	3577.19	-1.50973	0.370544	-4.07437	4.61399e-05	0.00160703
ENSRNOG00000004177	MYO1A	chr7:71177104-71191860	3132	32868.7	13759.3	6813.18	7315.68	14957.7	-1.51037	0.42868	-3.52331	0.000426196	0.010059
ENSRNOG00000004100	TRIB1	chr7:100534390-100540925	1972	171.406	206.926	38.2724	74.477	121.145	-1.51133	0.455077	-3.32105	0.000896791	0.0181494
ENSRNOG00000048125	NLRP1B	chr10:57503657-57587378	3363	223.954	118.982	48.0144	53.0367	109.401	-1.51205	0.456876	-3.30955	0.000934466	0.0186973
ENSRNOG00000020295	PLEKHN1	chr5:177120234-177127945	2801	763.196	647.936	235.897	223.431	461.576	-1.51291	0.330589	-4.57641	4.73017e-06	0.000234943
ENSRNOG00000001441	TMEM120A	chr12:25986847-25995509	1558	11345.3	3427.2	2309.56	1892.39	4666.05	-1.51329	0.484024	-3.12647	0.00176919	0.0307276
ENSRNOG00000012508	SLC39A8	chr2:259585228-259647901	3071	3286.75	1584.27	758.489	741.385	1568.96	-1.51478	0.407463	-3.71758	0.00020114	0.00545632
ENSRNOG00000000878	SLC44A4	chr20:6673375-6689628	2254	7038.92	4525.2	1722.95	1979.28	3764.21	-1.51495	0.353049	-4.29105	1.7783e-05	0.000729207
ENSRNOG00000046450	LOC102550729	chr18:86670193-86670571	192	78.8218	60.7844	20.8758	18.055	44.1687	-1.51505	0.500016	-3.03	0.00244556	0.0395609
ENSRNOG00000001086	VPS37B	chr12:39857152-39894365	2520	3491.93	1809.3	826.683	821.504	1712.27	-1.51543	0.39344	-3.85174	0.000117279	0.00348282
ENSRNOG00000011343	LDB3	chr16:9203391-9266393	1369	2283.33	1281.64	510.762	603.715	1153.39	-1.51612	0.385698	-3.93085	8.46473e-05	0.00268927
ENSRNOG00000009515	PGM3	chr8:93739287-93756358	2083	1973.05	860.034	359.76	485.229	905.648	-1.51808	0.438916	-3.45871	0.000542759	0.0122695
ENSRNOG00000045615	LOC688286	chr10:106516762-106521627	1179	145.132	85.3568	29.922	36.1101	72.9628	-1.51846	0.474913	-3.19735	0.00138695	0.025422
ENSRNOG00000014856	ETNK1	chr4:241606528-241650653	5906	2778.78	2035.63	633.234	899.367	1565.87	-1.51854	0.359356	-4.22573	2.38168e-05	0.000933222
ENSRNOG00000006523	ATL2	chr6:2548707-2590119	2831	4368.98	2496.04	890.702	1242.41	2217.79	-1.5186	0.392011	-3.87388	0.000107117	0.00325644
ENSRNOG00000013867	FGF1	chr18:32013702-32034673	1183	148.886	77.5971	34.0972	30.4679	71.6956	-1.52011	0.487474	-3.11834	0.00181873	0.0312866
ENSRNOG00000036693	SLC25A10	chr10:109258931-109266415	1938	11324.1	4835.59	2363.14	2494.98	5174.73	-1.52371	0.425927	-3.5774	0.000347032	0.00846927
ENSRNOG00000001291	ADAP1	chr12:19402558-19454794	2360	8350.11	4275.6	1885.78	2014.27	4071.4	-1.5247	0.393181	-3.87785	0.000105383	0.00322459
ENSRNOG00000012494	KCTD14	chr1:168624637-168630653	852	384.1	190.113	98.1164	69.9633	182.765	-1.52573	0.452388	-3.37261	0.000744597	0.0156299
ENSRNOG00000004005	CAMK2B	chr14:86893086-86982260	3976	8599.09	2011.06	1434.87	1412.81	3307.27	-1.52657	0.515739	-2.95996	0.00307683	0.0469716
ENSRNOG00000020621	DCST1	chr2:208082806-208118758	2208	188.922	99.5829	42.4475	40.6238	91.6573	-1.52768	0.467744	-3.26605	0.00109057	0.0211896
ENSRNOG00000025689	ABHD1	chr6:36599702-36608410	1364	2238.29	607.844	403.599	375.771	891.438	-1.52776	0.501912	-3.04388	0.0023355	0.0381745
ENSRNOG00000001557	CXADR	chr11:20481045-20528209	1614	805.734	482.395	171.878	223.431	414.885	-1.53246	0.395439	-3.87534	0.000106477	0.00325101
ENSRNOG00000039300	AHCYL2	chr4:56817401-56967031	5014	10468.3	5281.77	2120.29	2663.12	5058.48	-1.53707	0.402458	-3.8192	0.000133888	0.00388605
ENSRNOG00000001582	BACH1	chr11:30989416-31023028	3232	73.8173	112.516	19.4841	31.5963	58.8996	-1.53832	0.503257	-3.05672	0.00223775	0.0367043
ENSRNOG00000006010	SLC6A20	chr8:131864859-131905953	2911	2367.16	951.857	364.631	584.532	1050.91	-1.53855	0.462056	-3.3298	0.000869074	0.0177927
ENSRNOG00000012701	MAP7	chr1:17239997-17290726	1890	832.008	543.179	162.136	255.027	441.921	-1.54016	0.402409	-3.82735	0.000129529	0.0037829
ENSRNOG00000023520	CS	chr7:2731052-2757519	1629	9507.42	4041.51	1848.9	2153.06	4321.15	-1.54193	0.429317	-3.59159	0.000328667	0.00804893
ENSRNOG00000030264	FAM83H	chr7:117048587-117056776	4523	3927.33	1897.25	855.213	898.238	1866.3	-1.54424	0.406459	-3.79926	0.000145131	0.00416101
ENSRNOG00000004754	TC2N	chr6:134651342-134801529	2266	1109.76	690.614	241.464	308.064	579.399	-1.55407	0.381588	-4.07265	4.64815e-05	0.00161495
ENSRNOG00000030478	AY172581.9	chrM:67-1025	958	68309.8	34190.6	17111.2	13615.8	32818	-1.55465	0.402047	-3.86685	0.000110252	0.00333022
ENSRNOG00000050834	FAM102A	chr3:16905535-16934339	1179	102.594	76.3038	15.3089	31.5963	55.7658	-1.55526	0.515643	-3.01615	0.00256003	0.0409896
ENSRNOG00000020698	RND2	chr10:89174533-89178109	1351	1628.98	753.985	423.084	264.055	755.986	-1.55545	0.444003	-3.50323	0.000459644	0.0107289
ENSRNOG00000002129	LRRC8B	chr14:5409634-5471379	2750	260.237	139.675	59.1482	56.422	126.899	-1.55618	0.446088	-3.48851	0.000485713	0.0112135
ENSRNOG00000047137	ERBB2IP	chr2:53011408-53080898	4215	183.918	259.95	44.5351	82.3761	141.262	-1.56208	0.450553	-3.46703	0.000526248	0.011973
ENSRNOG00000042868	LOC100363099	chr10:82305512-82309384	489	304.027	159.074	53.5813	76.7339	146.36	-1.56304	0.455487	-3.43158	0.000600074	0.0131848
ENSRNOG00000014369	SLC27A4	chr3:13707125-13720047	3067	33061.4	13324.7	6616.25	6763.87	14711.6	-1.56515	0.43476	-3.60003	0.000318177	0.00787403
ENSRNOG00000012826	CREB3L2	chr4:64691124-64803069	3289	435.397	190.113	96.7247	77.8624	196.969	-1.56629	0.462153	-3.38912	0.000701183	0.0149184
ENSRNOG00000028273	TMEM150B	chr1:75808535-75842777	1667	2227.03	975.137	497.541	427.679	1016.38	-1.56819	0.430072	-3.64635	0.000265994	0.00684691
ENSRNOG00000016512	SEMA3B	chr8:115710331-115717175	2511	882.054	470.756	170.486	225.688	430.976	-1.5719	0.414297	-3.79413	0.000148164	0.00421396
ENSRNOG00000009702	LMO7	chr15:87780477-87996342	5190	1508.88	913.059	249.118	452.504	770.204	-1.57425	0.423538	-3.71691	0.000201674	0.0054603
ENSRNOG00000000645	REEP3	chr20:25003933-25086732	2498	1613.97	1218.27	384.811	486.358	913.668	-1.57579	0.34499	-4.56763	4.93262e-06	0.000240027
ENSRNOG00000010658	CTH	chr2:282366120-282392112	1742	2454.74	1211.81	402.208	648.853	1162.28	-1.57628	0.432771	-3.6423	0.000270208	0.00688007
ENSRNOG00000003253	QDPR	chr14:70207852-70221468	1311	8983.19	4354.49	1758.44	2146.29	4246.83	-1.57793	0.408325	-3.86439	0.000111368	0.00334958
ENSRNOG00000017741	NUDT5	chr17:78043453-78066592	1340	8555.3	3009.47	1819.68	1368.8	3629.65	-1.57985	0.465257	-3.39566	0.000684643	0.0146549
ENSRNOG00000046112	DEDD2	chr1:83342208-83356711	996	429.141	215.979	93.9413	90.2752	204.22	-1.58006	0.434804	-3.63397	0.000279096	0.00707793
ENSRNOG00000019887	RAB17	chr9:97800064-97807307	1287	4900.72	2286.53	1022.22	1065.25	2284.25	-1.58437	0.411899	-3.84651	0.000119815	0.0035432
ENSRNOG00000016326	CX3CL1	chr19:10638460-10647952	3063	1032.19	1143.26	313.833	358.844	703.778	-1.58665	0.324138	-4.89499	9.83115e-07	6.05582e-05
ENSRNOG00000000609	IPMK	chr20:20623398-20655922	5389	3703.38	1978.73	850.342	826.018	1813	-1.59029	0.387794	-4.10086	4.11617e-05	0.00146994
ENSRNOG00000016883	ENTPD7	chr1:270893393-270935069	2404	86.3287	76.3038	14.6131	27.0826	50.3738	-1.59183	0.50453	-3.15507	0.00160459	0.0285067
ENSRNOG00000002597	HSD17B6	chr7:2390323-2409187	1520	2671.18	1113.52	533.03	534.881	1194.72	-1.59283	0.434923	-3.66232	0.000249941	0.00651695
ENSRNOG00000028216	IGSF5	chr11:40265271-40305319	2136	4318.94	2379.64	892.79	1076.53	2136.36	-1.5952	0.386788	-4.12423	3.71983e-05	0.00134199
ENSRNOG00000008574	VDR	chr7:139536240-139585928	2042	489.196	351.773	80.024	156.853	265.962	-1.59755	0.434357	-3.67798	0.000235092	0.00619853
ENSRNOG00000014541	DDX60	chr16:29667539-29799350	5103	1635.24	1156.2	475.273	361.101	894.605	-1.59987	0.358197	-4.46645	7.95274e-06	0.000362713
ENSRNOG00000010370	TNIP1	chr10:40028043-40075239	2871	15013.7	8027.42	3418.77	3348.08	7344.68	-1.60046	0.38323	-4.17623	2.96384e-05	0.00110591
ENSRNOG00000010296	SLC7A7	chr15:36894260-36938138	2065	13631.2	5367.13	2972.02	2289.6	5970.89	-1.60198	0.445858	-3.59304	0.000326846	0.00803222
ENSRNOG00000022273	RFK	chr1:243798719-243806275	2254	8057.34	3454.36	1431.39	1803.25	3630.44	-1.6024	0.431575	-3.7129	0.000204897	0.00550528
ENSRNOG00000009845	ACADM	chr2:278788484-278812656	1953	8527.77	4747.65	1850.29	2040.22	4230.43	-1.60867	0.378051	-4.25516	2.08895e-05	0.000837289
ENSRNOG00000027784	TSKU	chr1:169524020-169535753	2573	4606.7	2912.48	1301.96	899.367	2396.38	-1.60996	0.379405	-4.24337	2.20187e-05	0.000874919
ENSRNOG00000009629	CAR2	chr2:107871642-107886834	1522	3667.09	1284.23	797.457	515.697	1541.05	-1.61084	0.476351	-3.38162	0.000720594	0.0152394
ENSRNOG00000012502	STK17B	chr9:60085946-60115674	2159	913.332	777.264	185.099	308.064	538.929	-1.61158	0.383344	-4.20399	2.62245e-05	0.00100796
ENSRNOG00000001967	SULT1B1	chr14:22057242-22070527	1288	5059.61	1857.16	832.946	1040.42	2163.08	-1.61265	0.457841	-3.52229	0.000427839	0.0100753
ENSRNOG00000009381	MAPK6	chr8:81861123-82010315	4173	7772.08	3247.44	1503.76	1561.76	3467.5	-1.61611	0.430403	-3.75487	0.000173429	0.00483557
ENSRNOG00000006508	THNSL2	chr4:163753103-163771684	1753	2040.61	989.363	434.217	423.165	957.41	-1.62018	0.410132	-3.95038	7.80283e-05	0.00250152
ENSRNOG00000032908	ACAA1A	chr8:127234653-127242997	1367	3345.55	1607.55	723.696	674.807	1564.75	-1.62391	0.408607	-3.97427	7.05966e-05	0.00229997
ENSRNOG00000032561	SLC52A2	chr7:117592707-117598130	5008	3219.18	1559.7	706.299	644.339	1509.62	-1.62457	0.407732	-3.9844	6.76509e-05	0.0022401
ENSRNOG00000020932	MS4A10	chr1:234082490-234095631	869	4227.6	1091.53	729.263	602.587	1635.05	-1.62465	0.507103	-3.20378	0.00135634	0.0251414
ENSRNOG00000004820	SAR1B	chr10:36988853-37018530	1219	14796	5901.26	2930.27	2742.11	6490.46	-1.62599	0.437599	-3.71571	0.000202633	0.00547161
ENSRNOG00000046204	TSPAN15	chr20:33606531-33648074	1518	4037.43	2352.48	991.602	862.128	2031.69	-1.62622	0.373557	-4.35335	1.34074e-05	0.000567944
ENSRNOG00000025160	TMEM56	chr2:242813587-242867287	3416	446.657	179.767	77.9365	86.8899	194.955	-1.62681	0.471963	-3.44691	0.000567033	0.0126388
ENSRNOG00000022946	SLC22A3	chr1:51234471-51321364	3486	287.762	187.526	29.2262	89.1468	146.506	-1.62712	0.51318	-3.17067	0.00152088	0.0272946
ENSRNOG00000016291	MARVELD3	chr19:52533501-52548323	1374	270.246	139.675	50.7979	58.6789	128.118	-1.63158	0.45349	-3.59782	0.000320893	0.0079135
ENSRNOG00000000543	FRK	chr20:42996502-43114433	3482	565.515	581.978	142.652	192.963	366.632	-1.6353	0.354901	-4.60776	4.07026e-06	0.000204324
ENSRNOG00000050998	AABR06099874.1	chr20:6718906-6779286	582	251.479	135.795	50.7979	53.0367	120.991	-1.63686	0.448473	-3.64986	0.000262388	0.00679127
ENSRNOG00000023129	MFSD9	chr9:47180039-47199516	3139	3513.2	1544.18	647.847	741.385	1587.21	-1.63777	0.426263	-3.84216	0.000121956	0.00359897
ENSRNOG00000033433	CSRNP1	chr8:127861111-127867216	2872	2753.76	1365.71	566.431	589.046	1299.42	-1.63894	0.40363	-4.06049	4.89702e-05	0.00167687
ENSRNOG00000005660	FAM110C	chr6:58647799-58654055	3111	997.159	532.833	178.836	243.743	481.251	-1.64419	0.414745	-3.96434	7.35995e-05	0.00238118
ENSRNOG00000016526	DSG2	chr18:15355368-15389421	3306	208.94	237.964	20.8758	83.5046	136.473	-1.64499	0.534955	-3.075	0.00210501	0.0349581
ENSRNOG00000010799	CCRN4L	chr2:159759665-159779874	2609	1852.94	569.045	308.266	306.936	746.894	-1.64564	0.486424	-3.38314	0.000716611	0.015178
ENSRNOG00000024849	TOR1AIP2	chr13:78633863-78660388	5079	7723.29	4037.63	1664.5	1653.16	3714.93	-1.64748	0.388763	-4.23776	2.25765e-05	0.000892057
ENSRNOG00000046803	ARHGEF16	chr5:175098147-175120197	2729	3921.07	2020.11	845.471	822.633	1874.6	-1.64756	0.394193	-4.17958	2.92046e-05	0.0011015
ENSRNOG00000020450	SLC26A6	chr8:116993105-117003173	2543	15203.9	6318.99	2793.19	3036.63	6733.8	-1.64942	0.430833	-3.82844	0.000128956	0.00378182
ENSRNOG00000017260	CDR2	chr1:197815830-197840738	2347	4683.02	2506.39	1050.05	977.229	2270.82	-1.64987	0.386998	-4.26325	2.01479e-05	0.000812016
ENSRNOG00000022943	DGKA	chr7:3116797-3142227	2710	4898.21	2928	1103.64	1139.72	2482.33	-1.65054	0.364434	-4.52906	5.9247e-06	0.000283301
ENSRNOG00000017424	CHRNA2	chr15:48768909-48785192	1931	38.7853	47.8515	9.0462	10.156	26.2123	-1.65097	0.561501	-2.94027	0.00327926	0.0494201
ENSRNOG00000047894	LIPH	chr11:85808220-85815457	1688	3589.52	1771.8	713.258	774.11	1687.13	-1.65277	0.403668	-4.09438	4.23308e-05	0.00149654
ENSRNOG00000000977	PNPLA6	chr12:4232146-4260092	4034	1784.13	999.709	338.189	436.706	877.144	-1.65822	0.394737	-4.20082	2.65953e-05	0.00101944
ENSRNOG00000019902	FOLR1	chr1:173124246-173133377	907	297.771	126.742	56.3648	51.9082	131.222	-1.6586	0.478703	-3.46478	0.000530674	0.0120349
ENSRNOG00000013791	ENPP3	chr1:23093112-23164279	2773	16406.2	5896.08	2905.92	2933.94	6924.51	-1.65901	0.454491	-3.65025	0.000261982	0.00679127
ENSRNOG00000010682	CLCN3	chr16:32284019-32353988	3808	1324.96	664.748	235.897	305.807	623.773	-1.65969	0.417535	-3.97497	7.03888e-05	0.00229997
ENSRNOG00000002191	LOC498368	chr14:45855971-45858411	1744	2626.14	1178.18	532.334	497.642	1190.33	-1.66057	0.422747	-3.92803	8.56428e-05	0.00270869
ENSRNOG00000009495	SRC	chr3:158125179-158138447	1983	723.159	594.911	177.445	204.248	419.357	-1.66186	0.341715	-4.86329	1.15449e-06	6.90051e-05
ENSRNOG00000012811	SPINT1	chr3:117599949-117612634	2289	13576.1	5064.5	2294.25	2579.61	5786.59	-1.66738	0.449941	-3.70577	0.000210746	0.00564096
ENSRNOG00000019938	SLC23A1	chr18:28123064-28139054	2380	1279.92	571.632	203.191	285.495	576.236	-1.66876	0.442496	-3.77125	0.000162433	0.00457343
ENSRNOG00000000588	SLC16A10	chr20:46863305-46979589	2481	1503.87	431.957	221.98	250.514	592.336	-1.66923	0.498734	-3.34694	0.00081708	0.0168751
ENSRNOG00000018268	HHIP	chr19:42430119-42518700	2542	135.123	60.7844	25.7469	20.3119	59.5899	-1.66952	0.522021	-3.19817	0.00138301	0.0254098
ENSRNOG00000002443	MFAP3	chr10:42738202-42750690	1903	195.178	293.576	48.0144	81.2477	152.938	-1.6708	0.444972	-3.75483	0.000173458	0.00483557
ENSRNOG00000003740	GPA33	chr13:89212322-89245475	1077	3089.07	1647.64	462.748	802.321	1479.04	-1.6714	0.428418	-3.90133	9.5664e-05	0.00294249
ENSRNOG00000019772	DNPEP	chr9:82274790-82283660	1647	28049.3	10708.4	5312.2	4813.93	12030.1	-1.6758	0.444902	-3.76668	0.000165435	0.0046394
ENSRNOG00000001174	PDE9A	chr20:12328641-12405854	1958	5561.32	3124.58	1275.51	1141.98	2736.51	-1.67623	0.377841	-4.43633	9.15052e-06	0.000411074
ENSRNOG00000030666	RT1-T18	chr20:5217572-5221833	1476	6078.04	2174.01	1160.7	951.275	2549.98	-1.67885	0.460314	-3.64719	0.000265126	0.00683705
ENSRNOG00000029778	MAOB	chrX:7249717-7352279	2459	3206.67	1815.77	551.818	815.862	1575.22	-1.67929	0.401272	-4.18492	2.85263e-05	0.0010817
ENSRNOG00000005302	SLC2A9	chr14:77061879-77174290	3384	2918.91	1154.9	529.55	531.495	1263.9	-1.68166	0.443579	-3.79112	0.000149968	0.00425642
ENSRNOG00000015159	SLC9A3	chr1:33159606-33201753	5158	3470.66	3625.08	864.26	1165.68	2254.82	-1.68726	0.32982	-5.11571	3.12563e-07	2.21559e-05
ENSRNOG00000000975	MCOLN1	chr12:4216867-4230870	2070	3061.54	1654.11	723.696	556.321	1477.42	-1.68897	0.396925	-4.25512	2.08936e-05	0.000837289
ENSRNOG00000036603	IFIT1LB	chr1:260136168-260143971	1257	7536.87	2851.69	1523.94	1128.44	3209.19	-1.69002	0.45525	-3.71229	0.000205389	0.00550803
ENSRNOG00000047218	CLIC5	chr9:18004699-18251818	2132	9971.59	3996.25	1948.41	1677.99	4330.57	-1.69205	0.439153	-3.85298	0.000116691	0.00347266
ENSRNOG00000009514	MME	chr2:173197264-173275026	3336	21412	4276.89	2859.99	2919.27	7729.56	-1.69268	0.53275	-3.17725	0.00148678	0.0268491
ENSRNOG00000002936	GOLT1A	chr13:55590137-55602840	748	2317.11	1081.19	449.526	450.248	1058.51	-1.69682	0.416194	-4.07699	4.56219e-05	0.00159293
ENSRNOG00000050784	AABR06026577.1	chr3:140728733-140920456	341	113.854	99.5829	16.0048	34.9816	65.4388	-1.69788	0.500884	-3.38976	0.000699538	0.0149075
ENSRNOG00000002322	RGD1310587	chr13:107456594-107466329	2698	8113.64	4168.26	1959.55	1294.32	3827.27	-1.69882	0.415115	-4.0924	4.26927e-05	0.00150556
ENSRNOG00000014876	LPIN2	chr9:118970172-119045052	5794	6261.96	2374.47	1075.11	1131.83	2668.47	-1.69912	0.44776	-3.7947	0.000147819	0.00421396
ENSRNOG00000015562	CDH17	chr5:30100264-30152642	3464	50561.1	25751.9	8659.99	11730.1	23824.9	-1.69914	0.405008	-4.19533	2.72479e-05	0.00104162
ENSRNOG00000048878	SMIM24	chr7:11350722-11353022	357	15389	5237.8	2663.76	2505.14	6346.02	-1.69965	0.463446	-3.66741	0.000245015	0.00640464
ENSRNOG00000010645	LGALS3	chr15:28094061-28106276	1227	37030	17481.3	8158.28	6258.33	16975.2	-1.70073	0.414914	-4.09899	4.14948e-05	0.00147067
ENSRNOG00000023172	DNAJB3	chr9:94910376-94990037	726	275.251	222.445	59.8441	74.477	155.742	-1.70511	0.391592	-4.3543	1.33495e-05	0.000567194
ENSRNOG00000049633	MFSD7B	chr13:114180964-114224409	1539	110.1	86.6501	13.2214	31.5963	59.7347	-1.7054	0.520719	-3.27508	0.00105631	0.0205806
ENSRNOG00000008788	MPP5	chr6:111299905-111403406	4317	1866.7	1004.88	320.792	438.963	895.011	-1.71074	0.405928	-4.21439	2.50456e-05	0.000970257
ENSRNOG00000018450	LOC100911440	chr1:220890717-220898559	2245	2731.24	1894.66	626.971	657.881	1457.98	-1.71543	0.340203	-5.04236	4.59832e-07	3.13352e-05
ENSRNOG00000021518	TRIM31	chr20:4183576-4196772	2451	6588.5	3275.89	1029.18	1529.04	3060.2	-1.71965	0.41951	-4.09919	4.14605e-05	0.00147067
ENSRNOG00000018524	EZR	chr1:48590972-48634511	2945	23645.3	9171.97	3821.67	4462.98	10116.2	-1.71984	0.443907	-3.87432	0.000106922	0.00325644
ENSRNOG00000014407	AABR06087423.1	chr16:31045828-31056120	573	372.84	254.777	86.2868	81.2477	196.078	-1.72339	0.390591	-4.41228	1.02289e-05	0.000450903
ENSRNOG00000006761	SH3GL2	chr5:107614519-107653528	1368	255.233	181.06	29.922	74.477	133.23	-1.72397	0.486146	-3.5462	0.00039083	0.00937592
ENSRNOG00000050997	IFRD1	chr6:69720075-69739843	1791	5403.67	2479.23	954.722	1086.69	2444.22	-1.72427	0.416779	-4.13714	3.51666e-05	0.00127659
ENSRNOG00000033865	LOC303140	chr10:39078692-39105980	2900	332.803	169.42	64.0192	62.0642	154.711	-1.72527	0.445908	-3.86911	0.000109235	0.0033137
ENSRNOG00000019994	PHLDB3	chr1:82733954-82750033	1929	1157.3	581.978	246.335	205.376	539.484	-1.72599	0.414782	-4.1612	3.16575e-05	0.00116596
ENSRNOG00000010347	STYK1	chr4:228091333-228103354	1290	172.657	120.275	16.0048	48.5229	88.3219	-1.72635	0.526298	-3.28017	0.00103745	0.0203087
ENSRNOG00000013049	TREH	chr8:47602120-47615939	1985	6839.98	1676.1	855.213	1073.15	2566.83	-1.72923	0.513285	-3.36895	0.000754539	0.0157216
ENSRNOG00000017672	AKR1C14	chr17:71510873-71530255	2299	34665.3	9972.52	5168.16	5364.6	13565.4	-1.73141	0.487572	-3.55109	0.000383637	0.00924696
ENSRNOG00000001770	EHHADH	chr11:86024802-86057811	3101	1904.24	1338.55	349.322	519.082	1014.13	-1.73197	0.374523	-4.62446	3.75576e-06	0.000189888
ENSRNOG00000015003	PEX11A	chr1:142435409-142442491	2259	834.511	327.201	154.481	129.771	355.886	-1.73233	0.462505	-3.74554	0.000180004	0.00499829
ENSRNOG00000002202	SOWAHB	chr14:16417564-16419868	2286	127.616	73.7172	14.6131	30.4679	60.8882	-1.73369	0.520211	-3.33267	0.000860176	0.0176361
ENSRNOG00000006611	NOSTRIN	chr3:61980712-62045299	1685	5351.13	2380.94	965.159	1014.47	2391.22	-1.73476	0.420526	-4.12521	3.70395e-05	0.00133969
ENSRNOG00000018262	AMPD3	chr1:182574032-182618403	3919	2671.18	1407.09	582.436	484.101	1267.39	-1.73689	0.397321	-4.37151	1.23393e-05	0.000530014
ENSRNOG00000022712	BEND7	chr17:79104804-79183747	1294	102.594	98.2896	13.2214	31.5963	60.7708	-1.73973	0.516061	-3.37117	0.000748497	0.0156651
ENSRNOG00000016724	EPB41L3	chr9:117003893-117131765	4528	15973.3	6587.99	2772.31	2898.96	6949.91	-1.74279	0.43158	-4.03817	5.38706e-05	0.00183108
ENSRNOG00000018204	LOC691960	chr3:121177529-121185650	1395	785.716	332.374	101.596	165.881	341.246	-1.7445	0.46953	-3.71542	0.000202868	0.00547161
ENSRNOG00000019977	PTPRF	chr5:140826094-140893372	6539	4104.99	3246.14	754.314	1198.4	2296.06	-1.74995	0.367794	-4.75796	1.95561e-06	0.000112595
ENSRNOG00000008113	RGD1561149	chr5:151141118-151147606	3190	1098.5	728.119	132.214	311.449	559.651	-1.75536	0.454936	-3.85847	0.000114097	0.0034239
ENSRNOG00000005531	TYRO3	chr3:118146799-118165787	3701	1441.31	795.37	321.488	255.027	692.946	-1.75537	0.397959	-4.41093	1.02927e-05	0.000451335
ENSRNOG00000046181	ANKS4B	chr1:196394579-197295841	1809	11573	4777.39	1924.06	2125.98	5021.95	-1.75957	0.432787	-4.06568	4.78924e-05	0.00165643
ENSRNOG00000042918	RGD1304770	chr20:46738155-46746616	2263	2101.92	786.317	274.865	408.495	878.824	-1.76236	0.468506	-3.76167	0.000168785	0.00472397
ENSRNOG00000009014	SLC35F2	chr8:56929087-56972651	2455	850.775	523.78	178.14	179.422	427.008	-1.76615	0.3794	-4.65511	3.238e-06	0.000167924
ENSRNOG00000000386	PBLD1	chr20:28943838-28958143	1985	4676.76	1641.18	803.72	691.734	1922.45	-1.77036	0.462882	-3.82464	0.000130964	0.00381691
ENSRNOG00000004281	COBL	chr14:92142187-92292689	4777	3124.1	1229.91	491.278	561.963	1330.85	-1.77046	0.445998	-3.96965	7.19793e-05	0.00233949
ENSRNOG00000042445	AABR06066170.1	chr10:103842328-103847916	1870	18923.5	8645.61	3797.31	3077.26	8481.87	-1.77182	0.418	-4.2388	2.24713e-05	0.000890395
ENSRNOG00000027924	FAM83G	chr10:47742919-47789792	2445	176.411	99.5829	24.3551	39.4954	83.5587	-1.77459	0.486361	-3.64872	0.000263553	0.00680893
ENSRNOG00000008051	ITPK1	chr6:135660942-135790645	1590	1491.36	891.073	244.943	358.844	736.133	-1.77467	0.398783	-4.45022	8.57837e-06	0.000389089
ENSRNOG00000017073	CAR9	chr5:63533526-63540122	2066	1319.95	572.925	217.805	242.615	579.598	-1.77559	0.436737	-4.06559	4.79105e-05	0.00165643
ENSRNOG00000021323	CAR13	chr2:108055052-108086130	1982	304.027	182.353	65.4109	54.1651	149.137	-1.78304	0.427572	-4.17015	3.04397e-05	0.00112699
ENSRNOG00000012115	LOC689599	chr9:114247446-114284503	1722	485.442	278.056	74.4571	111.716	233.919	-1.78328	0.431067	-4.13689	3.52043e-05	0.00127659
ENSRNOG00000033206	ENTPD5	chr6:117425814-117455726	1782	409.123	188.82	59.1482	81.2477	181.757	-1.78495	0.462663	-3.85799	0.000114324	0.0034239
ENSRNOG00000027228	MOGAT2	chr1:170384256-170407542	1746	8083.62	3495.75	1231.67	1580.94	3543.86	-1.7865	0.431172	-4.14336	3.42253e-05	0.0012475
ENSRNOG00000018521	NMUR1	chr9:93131273-93134679	1703	183.918	191.406	32.0096	57.5504	114.906	-1.78748	0.443921	-4.02658	5.65934e-05	0.00190982
ENSRNOG00000046602	MUC2	chr1:221600314-221611289	2615	73599.6	36143.4	12988.9	14502.7	33805.1	-1.78776	0.400258	-4.46652	7.95007e-06	0.000362713
ENSRNOG00000049031	MUC3	chr12:24581903-24595914	1326	6357.04	1553.23	869.826	833.917	2362.67	-1.79164	0.511269	-3.50429	0.000457825	0.0107099
ENSRNOG00000031162	CCL24	chr12:26145931-26149923	1455	3104.08	1381.23	587.307	504.413	1372.98	-1.79307	0.425471	-4.21431	2.50548e-05	0.000970257
ENSRNOG00000028100	PEX11G	chr12:4163472-4170562	1152	708.145	320.735	121.08	125.257	313.974	-1.7946	0.439774	-4.08072	4.48958e-05	0.00157147
ENSRNOG00000013358	AQP11	chr1:168910172-168920364	1314	2050.62	773.384	318.009	344.174	857.884	-1.7951	0.455118	-3.94426	8.00466e-05	0.0025604
ENSRNOG00000006663	USP2	chr8:47022639-47046713	2045	874.547	219.858	116.905	112.844	325.647	-1.79525	0.522494	-3.43593	0.000590528	0.0130564
ENSRNOG00000017355	CAPSL	chr2:77819898-77842887	948	185.169	113.809	36.1848	33.8532	90.9749	-1.80226	0.452543	-3.98252	6.81888e-05	0.00225263
ENSRNOG00000023423	AIM1L	chr5:155987650-156007400	4532	1337.47	525.074	199.016	234.716	565.119	-1.80239	0.455006	-3.96126	7.45565e-05	0.00240662
ENSRNOG00000037374	LY6AL	chr7:116449847-116453537	558	2614.88	1986.48	704.907	475.073	1426.37	-1.80264	0.361634	-4.98472	6.20505e-07	4.09012e-05
ENSRNOG00000024952	ATP8B1	chr18:59225405-59305493	4167	710.648	548.353	96.0288	205.376	385.012	-1.80395	0.435028	-4.14675	3.37223e-05	0.00123235
ENSRNOG00000016265	ACSL5	chr1:283660223-283685366	2335	75284.9	21376.7	10743.4	10661.5	29028.4	-1.80477	0.489037	-3.69046	0.000223853	0.00592589
ENSRNOG00000017775	SLC5A1	chr14:83595064-83660489	2627	11018.8	2617.61	1171.83	1668.96	4049.4	-1.81126	0.519663	-3.48544	0.000491327	0.0112877
ENSRNOG00000004964	ERBB3	chr7:2964639-2983936	4220	858.282	601.377	100.204	238.101	443.337	-1.81228	0.455195	-3.98134	6.85286e-05	0.00225856
ENSRNOG00000029340	BTN3A2	chr20:4911071-5039863	1939	481.689	253.484	86.2868	90.2752	224.462	-1.81252	0.426082	-4.25392	2.10059e-05	0.000839405
ENSRNOG00000046294	RGD1624210	chr20:6348953-6359267	1617	469.178	289.696	59.1482	117.358	230.549	-1.81434	0.452577	-4.00891	6.09988e-05	0.00204382
ENSRNOG00000005287	SYNE3	chr6:137837827-137913141	3085	170.155	89.2366	32.0096	24.8257	77.8558	-1.81541	0.487836	-3.72134	0.000198165	0.00540837
ENSRNOG00000016299	KLF4	chr5:76447644-76452001	2366	9097.04	5746.06	1645.02	2097.77	4582.88	-1.82045	0.364185	-4.99869	5.77217e-07	3.82264e-05
ENSRNOG00000017873	SCT	chr1:221182401-221183204	513	970.885	376.346	171.182	134.284	406.563	-1.8228	0.464544	-3.92385	8.71441e-05	0.00274387
ENSRNOG00000015599	MALL	chr3:127027481-127060350	1778	10176.8	5003.72	1681.2	2005.24	4647.59	-1.82287	0.40446	-4.50692	6.57742e-06	0.000308243
ENSRNOG00000008121	SLC13A1	chr4:50900831-50978269	2701	3963.61	2370.59	745.963	840.688	1952.92	-1.82461	0.368333	-4.95371	7.28123e-07	4.68991e-05
ENSRNOG00000017120	ABHD2	chr1:141965575-142049687	2023	2838.84	814.769	414.733	372.385	1091.89	-1.82828	0.493979	-3.70114	0.000214636	0.00573421
ENSRNOG00000021142	PEPD	chr1:92392877-92416063	1135	27427.5	9794.04	4612.17	3844.6	11238.8	-1.82958	0.457807	-3.99639	6.43162e-05	0.0021407
ENSRNOG00000049946	BTNL5	chr20:6319625-6326471	1764	874.547	521.194	165.615	177.165	428.686	-1.83038	0.386167	-4.73987	2.13859e-06	0.000120668
ENSRNOG00000047306	STAP2	chr9:10049872-10055402	1412	9114.56	3844.93	1516.28	1504.21	3934.08	-1.84314	0.428328	-4.30309	1.68432e-05	0.00069471
ENSRNOG00000029409	GSTM6L	chr2:230167121-230172478	1193	257.735	147.434	39.6641	51.9082	122.501	-1.84401	0.449499	-4.10237	4.08938e-05	0.00146408
ENSRNOG00000012356	SLC36A1	chr10:40381907-40411783	1808	355.324	124.155	50.7979	48.5229	142.446	-1.84617	0.503033	-3.67008	0.000242474	0.00635752
ENSRNOG00000013981	PTPN5	chr1:104263142-104320930	3324	127.616	125.449	26.4427	31.5963	76.8281	-1.84745	0.44154	-4.18411	2.86287e-05	0.00108267
ENSRNOG00000028711	DGAT1	chr7:117553998-117564368	1747	31972.9	11609.8	4996.28	4830.85	13141.9	-1.84765	0.452381	-4.08429	4.42125e-05	0.0015514
ENSRNOG00000008971	HNF4G	chr2:119962230-120107977	2284	292.767	301.335	25.7469	94.789	176.705	-1.8478	0.517508	-3.57057	0.000356206	0.00866317
ENSRNOG00000011039	GCH1	chr15:27876252-27910213	1016	2264.56	730.706	320.096	330.633	897.023	-1.84816	0.478163	-3.86514	0.000111026	0.00334645
ENSRNOG00000013982	HSD17B2	chr19:61033233-61101460	1268	12761.6	5810.73	2233.02	2140.65	5650.81	-1.84947	0.414127	-4.46596	7.97116e-06	0.000362713
ENSRNOG00000027976	IL22RA1	chr5:157843036-157867847	2118	197.68	117.689	29.2262	40.6238	95.1602	-1.85041	0.464394	-3.98458	6.75999e-05	0.0022401
ENSRNOG00000020851	APLP1	chr1:90053390-90063141	2106	6455.88	2541.3	1219.84	787.651	2708.44	-1.85167	0.458205	-4.04113	5.31941e-05	0.00181246
ENSRNOG00000017286	EPHX2	chr15:48799894-48836847	2033	3476.92	2832.29	574.781	964.816	1937.52	-1.85206	0.376046	-4.92509	8.43234e-07	5.33393e-05
ENSRNOG00000029007	UGT2B10	chr14:22705079-22724392	1599	922.09	609.137	128.734	230.202	466.147	-1.85227	0.417252	-4.43921	9.02905e-06	0.000406913
ENSRNOG00000008346	ITGB6	chr3:51762619-51835353	2792	177.662	129.328	22.9634	44.0092	92.2811	-1.85339	0.473538	-3.91391	9.0813e-05	0.00282783
ENSRNOG00000019181	SYNPO	chr18:55076842-55130938	2865	151.388	170.714	27.8344	45.1376	97.646	-1.85889	0.443891	-4.18773	2.8176e-05	0.00107129
ENSRNOG00000003835	SLC43A2	chr10:64285712-64327600	4492	11287.8	6846.65	2310.95	2139.52	5568.02	-1.86053	0.360075	-5.16706	2.37799e-07	1.78425e-05
ENSRNOG00000049498	NAT2	chr16:23845266-23875351	1385	407.815	283.421	70.8053	93.1417	210.908	-1.8626	0.397345	-4.68763	2.76391e-06	0.000148242
ENSRNOG00000017727	PRLR	chr2:84361343-84554681	2128	494.2	287.109	77.2406	103.816	237.133	-1.86338	0.419499	-4.44191	8.91636e-06	0.000403122
ENSRNOG00000010270	ESPN	chr5:172852354-172885677	1805	4579.17	1983.9	784.236	722.202	1986.66	-1.86547	0.426432	-4.3746	1.21654e-05	0.000524785
ENSRNOG00000013687	ABLIM1	chr1:285260912-285379156	1227	63.8082	27.159	5.56689	7.89908	25.8501	-1.86657	0.59708	-3.12617	0.00177099	0.0307276
ENSRNOG00000011875	SLC2A2	chr2:134112904-134144457	2572	15425.3	3702.67	2024.96	1829.2	5647.45	-1.86713	0.512379	-3.64405	0.000268382	0.00688007
ENSRNOG00000011386	NHSL1	chr1:15256104-15388904	4767	187.671	215.979	25.7469	60.9358	121.395	-1.86813	0.476046	-3.92427	8.69944e-05	0.00274387
ENSRNOG00000012344	SLC7A9	chr1:92843757-92865756	1599	6364.55	2506.39	914.362	1072.02	2672.27	-1.87013	0.443806	-4.21385	2.51059e-05	0.000970257
ENSRNOG00000000306	SMPD2	chr20:47904391-47907503	1549	13117	4388.11	2149.52	1608.03	5230.23	-1.87397	0.472376	-3.96711	7.27488e-05	0.00235907
ENSRNOG00000008167	ABHD6	chr15:22614364-22661344	2200	12999.3	5339.97	2063.92	2077.46	5533.78	-1.87694	0.432377	-4.34098	1.41848e-05	0.000597287
ENSRNOG00000049155	RGD1560718	chr1:56065259-56066765	1506	112.603	19.3993	8.35033	9.02752	36.576	-1.87733	0.622865	-3.01402	0.00257808	0.0411526
ENSRNOG00000007166	GRAMD1B	chr8:61211946-61373438	2831	1617.72	856.154	296.437	280.982	751.752	-1.88402	0.397466	-4.74008	2.13634e-06	0.000120668
ENSRNOG00000024641	LOC100910838	chr12:24043356-24054629	3854	461.671	212.099	83.5033	62.0642	201.927	-1.88634	0.459426	-4.10587	4.02799e-05	0.00144577
ENSRNOG00000025167	SEMA4B	chr1:142941087-142963935	1713	454.164	298.749	77.2406	98.1743	228.867	-1.88781	0.398682	-4.73512	2.1893e-06	0.000122361
ENSRNOG00000002164	NMU	chr14:34140349-34167675	708	870.794	499.208	175.357	143.312	416.036	-1.88879	0.399004	-4.73377	2.20392e-06	0.000122361
ENSRNOG00000018446	PRAP1	chr1:219472905-219476700	635	36134.2	7885.16	4013.03	4493.45	12904	-1.88916	0.523248	-3.61044	0.000305675	0.0076181
ENSRNOG00000006786	SLC5A4	chr20:15558115-15598211	2079	456.666	72.4239	29.2262	54.1651	150.23	-1.89065	0.589906	-3.20501	0.00135059	0.0251007
ENSRNOG00000024630	IGSF23	chr1:82115586-82129614	599	4113.75	1636	670.81	591.303	1725.87	-1.89691	0.44273	-4.28457	1.83092e-05	0.000746446
ENSRNOG00000019306	SYT12	chr1:226557952-226587017	2062	57.5525	47.8515	7.65447	11.2844	30.8609	-1.8989	0.548979	-3.45897	0.000542255	0.0122695
ENSRNOG00000028656	CCDC108	chr9:81931772-81964983	5538	133.872	32.3321	15.3089	10.156	46.9286	-1.89981	0.5957	-3.1892	0.00142666	0.0258669
ENSRNOG00000007980	ANXA13	chr7:98819725-98871641	1608	21135.5	10095.4	3630.31	3502.68	9449.03	-1.90152	0.404576	-4.70003	2.60124e-06	0.00014005
ENSRNOG00000018152	PTPRH	chr1:75692059-75720081	2954	11608.1	5405.93	1971.37	1891.27	5141.25	-1.90197	0.410163	-4.63711	3.53313e-06	0.000180573
ENSRNOG00000000783	TRIM40	chr20:4206662-4215227	744	385.351	173.3	34.7931	75.6055	164.755	-1.90212	0.503705	-3.77626	0.000159199	0.00449133
ENSRNOG00000016857	ZG16	chr1:205474984-205477337	627	150961	59531.2	23541	22682.8	63184.6	-1.90322	0.438145	-4.34381	1.40032e-05	0.000591405
ENSRNOG00000012987	PTK6	chr3:180408486-180417078	2142	116.356	144.848	13.9172	37.2385	77.173	-1.90541	0.513169	-3.71302	0.000204797	0.00550528
ENSRNOG00000003476	SLC6A4	chr10:62851325-62872481	2641	3281.74	1694.2	503.803	630.798	1505.65	-1.9058	0.402661	-4.73303	2.21197e-06	0.000122361
ENSRNOG00000000034	NUAK2	chr13:54160994-54177739	2875	2960.2	1859.74	526.767	612.743	1469.57	-1.90648	0.362877	-5.25379	1.48997e-07	1.21806e-05
ENSRNOG00000010111	EXOC3L4	chr6:144534910-144548933	3281	3019	1853.28	600.528	549.55	1484.9	-1.90707	0.363824	-5.24172	1.59085e-07	1.27503e-05
ENSRNOG00000008137	CDK18	chr13:53964632-53972998	1485	616.812	226.325	76.5447	95.9174	250.007	-1.90886	0.482466	-3.95647	7.60643e-05	0.00244969
ENSRNOG00000013140	PDZD2	chr2:82185699-82288609	7828	63.8082	62.0777	4.17517	15.7982	36.0766	-1.90988	0.582279	-3.28001	0.00103804	0.0203087
ENSRNOG00000038720	CDKL1	chr6:101526935-101570647	1801	247.726	131.915	52.1896	22.5688	112.103	-1.91223	0.503999	-3.79411	0.000148173	0.00421396
ENSRNOG00000047714	TMEM37	chr13:41205720-41211952	630	1749.09	750.105	318.009	220.046	747.674	-1.9136	0.447722	-4.27407	1.91935e-05	0.00077577
ENSRNOG00000049976	GZMB	chr15:39296941-39300403	1475	203.936	172.007	43.8393	40.6238	113.807	-1.91437	0.406692	-4.70718	2.51165e-06	0.000136267
ENSRNOG00000025608	LRAT	chr2:201315317-201454615	696	18.7671	15.5194	1.39172	1.12844	9.13788	-1.9154	0.652131	-2.93714	0.00331256	0.0498156
ENSRNOG00000005229	SEC16B	chr13:80091716-80133075	4356	3654.58	2210.22	659.676	713.174	1784.39	-1.91731	0.365243	-5.24941	1.52587e-07	1.23602e-05
ENSRNOG00000010610	HPGD	chr16:37259044-37296863	1678	18373	8080.44	2833.55	3021.96	7955.36	-1.91964	0.420323	-4.56706	4.94606e-06	0.000240027
ENSRNOG00000015408	VIL1	chr9:81454350-81482170	3301	86492.6	36731.9	13863.6	13247.9	37011.7	-1.92015	0.42538	-4.51397	6.36251e-06	0.000300166
ENSRNOG00000028625	EIF4EBP3	chr18:29196054-29197801	634	4676.76	1804.13	812.07	548.422	1929.62	-1.92568	0.459268	-4.19293	2.75371e-05	0.00104983
ENSRNOG00000013737	BCAR3	chr2:245929015-246041116	3337	2319.61	1523.49	416.125	482.972	1169.45	-1.92751	0.357005	-5.3991	6.69771e-08	6.13492e-06
ENSRNOG00000032664	RT1-O1	chr20:5258700-5261105	546	28.7762	18.106	2.78344	1.12844	12.5755	-1.92815	0.644224	-2.99298	0.0027627	0.0432527
ENSRNOG00000008755	ACOX1	chr10:103537777-103562620	3741	15919.5	8967.63	2834.24	2889.93	7544.61	-1.93157	0.37308	-5.17738	2.25025e-07	1.71578e-05
ENSRNOG00000012290	GCHFR	chr3:117526534-117530595	657	3164.13	1184.65	455.789	457.018	1294.88	-1.93565	0.452719	-4.27562	1.90608e-05	0.000772618
ENSRNOG00000009687	CCDC120	chrX:16388332-16398891	3203	1654.01	786.317	259.556	275.339	732.738	-1.93622	0.417412	-4.63863	3.50728e-06	0.000179904
ENSRNOG00000049653	ERRFI1	chr5:171529355-171541439	1418	275.251	292.282	68.8903	60.9358	172.237	-1.93671	0.375359	-5.15961	2.47462e-07	1.84693e-05
ENSRNOG00000009565	PDK4	chr4:30451700-30463752	3474	2020.59	1060.49	343.06	346.431	928.891	-1.93883	0.397013	-4.88354	1.04198e-06	6.30276e-05
ENSRNOG00000049919	LOC691670	chr15:39050334-39053158	748	26.2739	27.159	2.78344	3.38532	14.5836	-1.94078	0.626059	-3.1	0.00193521	0.0326922
ENSRNOG00000011815	SGK1	chr1:25652754-25660738	2439	14051.6	6616.44	2681.85	1785.19	6190.07	-1.9411	0.427163	-4.54417	5.51521e-06	0.000264618
ENSRNOG00000010655	MTTP	chr2:261907824-261948693	3997	52380.2	23208	6047.73	9934.79	22549.3	-1.94131	0.444122	-4.37111	1.23617e-05	0.000530014
ENSRNOG00000039079	CES2H	chr19:47917774-47932374	1999	216.447	90.5299	27.1386	31.5963	90.1056	-1.94134	0.503745	-3.85382	0.000116289	0.0034703
ENSRNOG00000002636	ABAT	chr10:5895468-6002068	1725	1556.42	587.151	231.722	211.018	636.374	-1.94508	0.458378	-4.2434	2.20157e-05	0.000874919
ENSRNOG00000021526	SLC25A34	chr5:163890564-163894419	1310	436.648	182.353	56.3648	68.8348	183.159	-1.94596	0.473425	-4.11039	3.94988e-05	0.00142135
ENSRNOG00000018076	FMO5	chr2:219274826-219301535	2056	1378.76	399.625	168.398	176.037	521.987	-1.94641	0.498499	-3.90455	9.44005e-05	0.00291381
ENSRNOG00000027990	CRIP1	chr6:146959580-146961385	411	113647	41696.8	18866.2	13065.1	46079.2	-1.94716	0.461438	-4.21977	2.44553e-05	0.000952946
ENSRNOG00000011163	SOAT2	chr7:141552393-141565491	2193	9676.32	4467	1619.27	1469.23	4243.41	-1.94775	0.413097	-4.71498	2.4173e-06	0.000131654
ENSRNOG00000015035	MYO7B	chr18:24422407-24538352	6568	15190.1	6619.03	2373.58	2329.1	6527.67	-1.95098	0.42175	-4.62592	3.72943e-06	0.000189235
ENSRNOG00000004795	POF1B	chrX:84048664-84115822	3878	2692.45	1303.63	402.208	469.431	1198.84	-1.95151	0.411906	-4.73775	2.16105e-06	0.00012145
ENSRNOG00000027139	KRT20	chr10:87138401-87147194	1404	75754	27574.1	10660.6	10717.9	30685.1	-1.95553	0.451602	-4.33021	1.48969e-05	0.000625403
ENSRNOG00000031067	SI	chr2:189563592-189643699	5536	54135.6	19642.4	6834.75	8330.14	21885.4	-1.95644	0.455731	-4.29296	1.76303e-05	0.000725054
ENSRNOG00000042950	SLC5A9	chr5:135659666-135683146	3398	1950.53	796.663	272.082	302.422	817.749	-1.95792	0.44313	-4.4184	9.94358e-06	0.000439699
ENSRNOG00000018336	EPS8L2	chr1:221245324-221270579	3055	12337.5	6159.91	2056.27	2019.91	5560.93	-1.95805	0.3968	-4.93462	8.03087e-07	5.12595e-05
ENSRNOG00000002667	LAMC2	chr13:75532725-75592335	5157	3065.29	2172.72	371.59	751.541	1569.64	-1.96297	0.419288	-4.68167	2.84544e-06	0.000150894
ENSRNOG00000004033	SEMA6A	chr18:40975359-41030839	1815	236.466	204.339	42.4475	54.1651	132.346	-1.96483	0.403033	-4.87512	1.08741e-06	6.52725e-05
ENSRNOG00000033915	GPT	chr7:117747057-117749910	1744	29994.8	11053.7	4245.45	4168.46	12171	-1.97009	0.449989	-4.3781	1.1972e-05	0.000518027
ENSRNOG00000009564	PRR15	chr4:149139527-149142572	1415	10439.5	3078.02	1299.87	1321.4	3968.32	-1.97148	0.485295	-4.06244	4.85633e-05	0.00167082
ENSRNOG00000009597	CYP4A1	chr5:138259231-138316870	2089	256.484	56.9045	28.5303	19.1835	88.6803	-1.97791	0.574658	-3.44189	0.000577671	0.0128527
ENSRNOG00000030182	CYP2D1	chr7:123610226-123614683	1675	1597.71	646.642	283.911	156.853	661.102	-1.9792	0.474357	-4.17239	3.01417e-05	0.00111889
ENSRNOG00000029179	CYP2D3	chr7:123619362-123623725	1645	207.689	72.4239	19.4841	29.3394	80.6947	-1.97958	0.539095	-3.67205	0.000240616	0.00632053
ENSRNOG00000018740	UGT1A3	chr9:94910376-94990037	2243	35043.2	25446.7	6113.14	7675.65	18326.5	-1.9821	0.337929	-5.86544	4.47943e-09	5.49451e-07
ENSRNOG00000012262	DEPDC7	chr3:101290428-101311699	1704	1699.05	741.052	271.386	233.587	725.093	-1.98387	0.434409	-4.56683	4.95163e-06	0.000240027
ENSRNOG00000028750	TUBAL3	chr17:71677829-71686515	1290	2013.08	822.529	281.824	297.908	840.883	-1.98625	0.441971	-4.49408	6.98727e-06	0.000326366
ENSRNOG00000049345	MEP1B	chr18:14847670-14873302	2289	28482.2	9565.13	3826.54	3695.64	11209.6	-1.98782	0.464871	-4.27607	1.90222e-05	0.000772618
ENSRNOG00000013121	MIER3	chr2:62316533-62339547	3973	163.899	117.689	27.8344	29.3394	83.6371	-1.99559	0.445879	-4.47563	7.61859e-06	0.000354679
ENSRNOG00000014907	ALDH8A1	chr1:18065378-18084260	1499	43.7899	42.6784	6.95861	5.6422	24.7078	-2.00404	0.572904	-3.49803	0.000468701	0.0109101
ENSRNOG00000042162	WFDC3	chr3:167377587-167445774	915	542.995	223.738	73.0654	75.6055	225.489	-2.00938	0.464918	-4.32202	1.54608e-05	0.000647151
ENSRNOG00000017941	OPTN	chr17:78833449-78884466	4071	22543	9888.45	3395.11	3296.17	9632.66	-2.00962	0.420153	-4.78305	1.72653e-06	0.000101056
ENSRNOG00000004402	LPGAT1	chr13:114962168-115028639	3761	3405.6	1444.6	488.495	498.771	1437.27	-2.01001	0.431307	-4.66026	3.15804e-06	0.00016499
ENSRNOG00000036951	SLC2A7	chr5:170826804-170839326	1182	844.52	269.003	92.5495	111.716	324.404	-2.01167	0.495462	-4.0602	4.90313e-05	0.00167687
ENSRNOG00000008575	AOC1	chr4:143183685-143203220	2764	22080.1	12279.7	3470.96	3913.43	10287.9	-2.01486	0.377778	-5.33344	9.63694e-08	8.40997e-06
ENSRNOG00000024016	CYP2C6V1	chr1:154005927-154103292	1615	71.315	14.2261	2.08758	4.51376	22.5909	-2.01499	0.641808	-3.13955	0.00169205	0.0296497
ENSRNOG00000019528	PLEKHG6	chr4:224894465-224910903	2352	1568.93	656.989	235.201	206.505	656.794	-2.0235	0.441927	-4.5788	4.67647e-06	0.000233097
ENSRNOG00000020035	CYP17A1	chr1:273852189-273858192	1719	12061	3914.77	1500.28	1526.78	4673.96	-2.02825	0.470955	-4.30667	1.65727e-05	0.000685558
ENSRNOG00000028810	GZMF	chr15:39071310-39082672	866	33.7808	29.7455	4.87103	2.25688	17.5351	-2.02898	0.61948	-3.27529	0.00105552	0.0205806
ENSRNOG00000042237	TM6SF2	chr16:20941991-20949189	1372	3605.79	1337.26	499.628	460.404	1452.54	-2.02928	0.454341	-4.46642	7.95392e-06	0.000362713
ENSRNOG00000016573	DGAT2	chr1:170316040-170346306	2294	16581.4	5347.73	2075.06	2065.05	6411.74	-2.03169	0.471447	-4.30947	1.63644e-05	0.000679014
ENSRNOG00000018019	HSPA12A	chr1:287309701-287379109	6331	550.502	472.049	123.863	97.0458	307.127	-2.03269	0.358965	-5.66263	1.49067e-08	1.63003e-06
ENSRNOG00000028557	HIBCH	chr9:53112587-53193104	1860	3007.74	1853.28	513.546	524.725	1454.66	-2.04101	0.362161	-5.63564	1.74414e-08	1.84984e-06
ENSRNOG00000003566	APOH	chr10:96364125-96378117	1235	22.5205	20.6926	2.08758	1.12844	11.6114	-2.04265	0.64514	-3.16622	0.00154436	0.0276106
ENSRNOG00000008979	GUCA2B	chr5:142497884-142499935	526	26716.9	6348.73	3180.09	2473.54	9513.85	-2.04964	0.51573	-3.97425	7.06002e-05	0.00229997
ENSRNOG00000043123	RNF128	chr3:53714661-53773426	2720	13717.5	5892.2	1697.21	2166.6	5779.55	-2.05048	0.431249	-4.75475	1.98696e-06	0.000113935
ENSRNOG00000002361	PRKG2	chr14:12160806-12255994	2947	1084.74	773.384	140.564	239.229	552.166	-2.05196	0.399706	-5.13368	2.84136e-07	2.08751e-05
ENSRNOG00000007047	EPS8	chr4:235734053-235794456	2487	425.388	457.823	71.6737	110.587	263.476	-2.05462	0.386674	-5.31357	1.075e-07	9.13489e-06
ENSRNOG00000005425	CYP4F5	chr7:14712626-14726344	1654	1112.26	656.989	109.25	230.202	519.701	-2.05482	0.450125	-4.565	4.99503e-06	0.000241187
ENSRNOG00000022054	PAQR7	chr5:156503751-156504789	1038	445.406	231.498	67.4985	65.4495	199.076	-2.0579	0.433969	-4.74206	2.11557e-06	0.000120331
ENSRNOG00000019050	IFIT1	chr1:260165587-260166976	1389	716.903	481.102	148.218	94.789	355.389	-2.05949	0.402271	-5.11967	3.06079e-07	2.19284e-05
ENSRNOG00000003232	SLC9A3R1	chr10:104573315-104590543	1917	44036.4	12270.7	5628.82	4271.15	16275.4	-2.06464	0.496272	-4.1603	3.17826e-05	0.00116751
ENSRNOG00000013437	LOC691083	chr3:101854192-102019988	1484	449.159	275.47	80.7199	63.1926	213.997	-2.0682	0.413016	-5.00756	5.51237e-07	3.6678e-05
ENSRNOG00000007539	RSAD2	chr6:54376867-54388860	2464	191.424	129.328	33.4013	28.211	93.9727	-2.06884	0.445602	-4.6428	3.43718e-06	0.000176952
ENSRNOG00000032202	CREB3L3	chr7:11658215-11666646	1923	39867.6	15978.5	4923.22	5796.8	16384.9	-2.07137	0.438465	-4.72414	2.31097e-06	0.000126351
ENSRNOG00000014481	ADTRP	chr17:24598243-24662657	623	7290.39	3460.83	974.206	1157.78	3173.11	-2.07281	0.411659	-5.03525	4.77219e-07	3.23637e-05
ENSRNOG00000003064	BST1	chr14:71827039-71843323	1390	6753.66	3419.44	970.726	1069.76	3009.05	-2.07868	0.397221	-5.23306	1.66725e-07	1.32162e-05
ENSRNOG00000031689	TRIM15	chr20:4231806-4248757	492	108.849	100.876	5.56689	24.8257	59.5404	-2.08005	0.55893	-3.72149	0.000198054	0.00540837
ENSRNOG00000039396	BTNL3	chr20:6236995-6251243	2175	8331.34	3855.28	1190.62	1205.17	3591.14	-2.08321	0.412049	-5.05572	4.28773e-07	2.95038e-05
ENSRNOG00000007923	CGREF1	chr6:36612740-36624744	1331	20930.3	7603.22	2911.48	2381.01	8322.48	-2.08337	0.456011	-4.56869	4.90789e-06	0.000240027
ENSRNOG00000019213	GPD1	chrX:115875187-115882576	2822	19698	6969.51	2422.29	2504.01	7773.08	-2.08612	0.457044	-4.56438	5.00976e-06	0.000241187
ENSRNOG00000033672	ALPP	chr9:93903653-93934229	1590	42.5388	7.75971	0.695861	0	12.7633	-2.0905	0.653189	-3.20045	0.00137215	0.0252683
ENSRNOG00000028889	SLC51B	chr8:70622265-70624908	384	2766.27	1205.34	418.908	337.404	1163.82	-2.09136	0.433049	-4.82938	1.36959e-06	8.15168e-05
ENSRNOG00000019220	RHOD	chr1:226536282-226550218	1486	3210.43	1645.06	473.881	486.358	1432.65	-2.09745	0.397302	-5.27924	1.29724e-07	1.08277e-05
ENSRNOG00000046080	CYP2C7	chr1:153843591-153888841	990	38.7853	9.05299	0	1.12844	12.0355	-2.09842	0.653348	-3.2118	0.00131908	0.024645
ENSRNOG00000023116	AGMO	chr6:66448762-66793162	2101	7301.65	2594.33	855.213	947.89	2878.37	-2.09934	0.458985	-4.57389	4.78759e-06	0.000236961
ENSRNOG00000018911	PFKFB3	chr17:72386424-72413515	2072	47.5433	126.742	15.3089	10.156	49.627	-2.10047	0.563965	-3.72448	0.000195719	0.00537122
ENSRNOG00000036641	LOC689065	chr1:226611404-226613312	1212	4323.94	2049.86	641.584	594.688	1874.53	-2.10212	0.410682	-5.11861	3.078e-07	2.19284e-05
ENSRNOG00000034116	GK	chrX:54426882-54503311	2965	6195.65	4115.23	1052.84	1083.3	3069.82	-2.10361	0.343666	-6.12109	9.29381e-10	1.32423e-07
ENSRNOG00000031004	CYP2J4	chr5:123437431-123455817	1933	14928.6	4690.74	1681.2	1782.94	5677.06	-2.10416	0.475813	-4.42224	9.76815e-06	0.000434667
ENSRNOG00000019424	ASPDH	chr1:101536452-101538714	950	63.8082	7.75971	1.39172	2.25688	18.3936	-2.10497	0.652349	-3.22676	0.00125202	0.0238018
ENSRNOG00000042721	GIMD1	chr2:256220310-256254947	1618	1403.78	726.826	153.785	247.128	623.876	-2.10902	0.43131	-4.88979	1.00941e-06	6.16399e-05
ENSRNOG00000008526	PDZD3	chr8:47196474-47200923	2121	2900.14	1400.63	378.548	446.862	1262.88	-2.11241	0.412647	-5.11917	3.06882e-07	2.19284e-05
ENSRNOG00000002159	AGPAT9	chr14:10293027-10343730	1985	864.538	433.25	72.3696	154.596	375.717	-2.12062	0.473908	-4.47475	7.65013e-06	0.000354976
ENSRNOG00000032917	ZFAND2A	chr12:19239056-19250441	3194	3841	1912.77	558.777	552.936	1691.38	-2.12108	0.40146	-5.28341	1.26799e-07	1.06466e-05
ENSRNOG00000017893	BAIAP3	chr10:14418872-14427212	3453	301.525	173.3	48.7103	38.367	138.519	-2.12177	0.443701	-4.78199	1.73565e-06	0.00010117
ENSRNOG00000008518	GSG1	chr4:233291208-233307476	1349	86.3287	16.8127	5.56689	2.25688	27.2531	-2.12263	0.637831	-3.32789	0.000875066	0.0178377
ENSRNOG00000006931	EEPD1	chr8:26673118-26779323	2258	3413.11	1945.1	578.956	472.816	1579.87	-2.12663	0.383103	-5.55108	2.8391e-08	2.8203e-06
ENSRNOG00000046240	AABR06076649.1	chr13:108048879-108049367	483	31.2785	14.2261	1.39172	1.12844	11.5736	-2.13198	0.650216	-3.27888	0.0010422	0.0203619
ENSRNOG00000023536	GPR133	chr12:33063955-33175985	2712	203.936	206.926	30.6179	46.266	120.59	-2.1348	0.420449	-5.07744	3.82552e-07	2.67143e-05
ENSRNOG00000010337	SLC13A2	chr10:65951596-65978953	2428	12412.6	4373.89	1523.94	1442.15	4859.68	-2.13837	0.458447	-4.66437	3.09564e-06	0.000162331
ENSRNOG00000030763	DPP4	chr3:54961699-55038565	2234	5048.35	2693.91	614.445	854.229	2269.54	-2.14322	0.403174	-5.31586	1.06153e-07	9.07511e-06
ENSRNOG00000028288	CLRN3	chr1:214683449-214698947	1889	6843.74	3032.75	725.783	1059.61	2871.93	-2.1501	0.436405	-4.92685	8.35647e-07	5.30975e-05
ENSRNOG00000012294	HEPH	chrX:66393129-66488433	4253	12331.2	5958.16	1740.35	1698.3	5351.63	-2.1542	0.40316	-5.3433	9.12713e-08	8.09732e-06
ENSRNOG00000029651	LOC100365958	chr7:71230579-71245358	1697	969.634	453.943	92.5495	155.725	412.058	-2.15688	0.455613	-4.73401	2.2013e-06	0.000122361
ENSRNOG00000032261	CYP2D4	chr7:123583984-123593008	1759	3987.38	1024.28	461.356	320.477	1423.41	-2.16287	0.513556	-4.21156	2.53611e-05	0.000977441
ENSRNOG00000049955	NPC1L1	chr14:87307374-87523225	4466	19293.8	10496.3	2383.32	3221.7	8722.75	-2.16609	0.394313	-5.49332	3.9444e-08	3.73421e-06
ENSRNOG00000001082	ABCB9	chr12:39796336-39829020	2518	484.191	213.392	54.973	64.3211	200.923	-2.17326	0.461922	-4.70483	2.54076e-06	0.000137318
ENSRNOG00000005250	ABCG5	chr6:7871268-7896799	2470	5618.87	2070.55	646.455	684.963	2219.74	-2.17359	0.453316	-4.79486	1.62792e-06	9.56809e-05
ENSRNOG00000005569	PHOSPHO1	chr10:83440619-83447961	1999	1645.25	468.169	174.661	159.11	601.573	-2.18028	0.500273	-4.35819	1.3114e-05	0.000560565
ENSRNOG00000010265	ADA	chr3:166306002-166330118	1403	21961.3	7238.51	2427.16	2470.16	8386.7	-2.1832	0.467942	-4.66553	3.07824e-06	0.000162021
ENSRNOG00000006995	ANO6	chr7:136781651-136973259	5451	13845.1	7916.19	1885.09	2234.31	6379.06	-2.1837	0.375825	-5.81042	6.23162e-09	7.38682e-07
ENSRNOG00000014475	SLC31A1	chr5:82342330-82369096	1446	9280.96	3764.75	1111.29	1180.35	3775.21	-2.18779	0.435793	-5.02024	5.1608e-07	3.48317e-05
ENSRNOG00000005911	RLN3	chr19:36140920-36143406	924	27.5251	16.8127	1.39172	1.12844	11.5893	-2.19173	0.648326	-3.3806	0.00072328	0.0152505
ENSRNOG00000039808	ISX	chr19:25313084-25332674	729	362.831	181.06	36.1848	54.1651	156.191	-2.20352	0.465984	-4.72874	2.25913e-06	0.000123997
ENSRNOG00000025406	IQGAP2	chr2:45296358-45569036	4728	2290.84	1787.32	255.381	484.101	1188.99	-2.2037	0.40311	-5.46675	4.58366e-08	4.25376e-06
ENSRNOG00000015859	CHDH	chr16:6009401-6042912	3405	4531.63	1771.8	521.896	556.321	1816.83	-2.20522	0.444524	-4.96086	7.01824e-07	4.54125e-05
ENSRNOG00000017762	CDHR5	chr1:221172657-221181061	2119	46681.3	18147.4	6063.73	5017.04	18681.5	-2.20685	0.444136	-4.96886	6.73475e-07	4.3779e-05
ENSRNOG00000020578	CEACAM1	chr1:83589573-83605846	3393	8614.1	5076.14	1223.32	1329.3	4003.89	-2.2153	0.367057	-6.0353	1.58672e-09	2.15214e-07
ENSRNOG00000046195	SLC22A4	chr10:39118472-39154295	1055	126.365	55.6112	13.2214	12.4128	50.9697	-2.21676	0.54071	-4.09973	4.13639e-05	0.00147067
ENSRNOG00000011042	RGD1560925	chr9:105131605-105256934	3949	125.114	58.1978	9.74206	14.6697	51.2273	-2.21747	0.542248	-4.0894	4.32491e-05	0.00152137
ENSRNOG00000016253	SLC6A18	chr1:33646635-33660461	2337	37.5342	10.3463	0	0	11.794	-2.22147	0.652113	-3.40658	0.000657826	0.0142003
ENSRNOG00000021267	GPCPD1	chr3:131661270-131700120	3427	4794.37	3240.97	830.858	679.321	2354.26	-2.22574	0.350736	-6.34592	2.211e-10	3.75764e-08
ENSRNOG00000010603	GZMA	chr2:64004694-64017285	786	884.556	332.374	123.167	63.1926	345.217	-2.22642	0.498198	-4.46894	7.86088e-06	0.000362371
ENSRNOG00000032701	SLC6A8	chr1:152879304-152888609	3916	31924.1	11404.2	3780.61	3333.41	12410.2	-2.23313	0.456329	-4.89368	9.89685e-07	6.06978e-05
ENSRNOG00000016219	VNN1	chr1:24089367-24099667	2349	2571.09	1703.26	457.877	322.734	1246.68	-2.23368	0.373998	-5.97243	2.33744e-09	3.08149e-07
ENSRNOG00000011320	IGFBPL1	chr5:65911663-65927068	1328	92.5844	33.6254	8.35033	5.6422	34.6913	-2.23414	0.58872	-3.79492	0.000147691	0.00421396
ENSRNOG00000026177	MGAM	chr4:133643836-133783434	5547	7085.21	2295.58	471.098	928.706	2651.74	-2.24462	0.501757	-4.47353	7.69403e-06	0.000355843
ENSRNOG00000051171	G6PC	chr10:89034247-89109170	2423	600.491	434.453	112.012	67.7064	299.515	-2.25103	0.405954	-5.54505	2.93869e-08	2.89882e-06
ENSRNOG00000002210	HSD17B11	chr14:7064322-7095461	1611	32012.9	11665.4	3448.69	3659.53	12496.2	-2.25198	0.452183	-4.98023	6.35078e-07	4.14741e-05
ENSRNOG00000007092	FGB	chr2:201315317-201454615	1612	21.2694	24.5724	1.39172	1.12844	11.8758	-2.25753	0.646349	-3.49275	0.000478071	0.0110916
ENSRNOG00000018580	KLK8	chr1:100803925-100810769	1302	669.36	193.993	68.1944	55.2936	242.406	-2.26131	0.514902	-4.39172	1.12456e-05	0.000489602
ENSRNOG00000016920	SPIRE2	chr19:66847907-66886394	2268	1346.23	629.83	162.832	169.266	568.424	-2.26377	0.424271	-5.33567	9.51898e-08	8.39217e-06
ENSRNOG00000008849	GUCA2A	chr5:142487927-142489769	557	70820.8	25329	8525.69	6715.35	27405.1	-2.27101	0.459145	-4.94618	7.56857e-07	4.85283e-05
ENSRNOG00000022225	LRRC19	chr5:117537608-117629815	1080	346.566	303.922	24.3551	73.3486	184.745	-2.2718	0.492863	-4.60938	4.03864e-06	0.000203461
ENSRNOG00000015089	MCOLN2	chr2:270540813-270589450	2516	882.054	462.996	103.683	123	387.344	-2.27279	0.415627	-5.46833	4.54295e-08	4.24389e-06
ENSRNOG00000046619	PLA2G12B	chr20:30793919-30811874	588	985.899	430.664	123.863	104.945	405.266	-2.27596	0.444482	-5.12049	3.0475e-07	2.19284e-05
ENSRNOG00000021303	LRRC48	chr10:46477105-46517577	1814	1151.05	331.081	128.038	80.1192	415.459	-2.28081	0.514672	-4.43159	9.3542e-06	0.000417565
ENSRNOG00000008988	CYP2D2	chr7:123636788-123640858	1674	699.387	222.445	69.5861	63.1926	259.205	-2.28636	0.500189	-4.571	4.8541e-06	0.000239412
ENSRNOG00000024848	FGA	chr2:201315317-201454615	2363	482.94	584.565	68.1944	113.972	309.152	-2.28876	0.400837	-5.70997	1.12999e-08	1.26008e-06
ENSRNOG00000042920	TAS1R2	chr5:161806690-161874412	1707	555.506	201.752	41.7517	66.578	213.331	-2.29156	0.49998	-4.58331	4.57675e-06	0.000228935
ENSRNOG00000047027	UNC93A	chr1:54820750-54837467	1371	227.708	107.343	23.6593	24.8257	94.5743	-2.29534	0.490119	-4.68323	2.82394e-06	0.000150319
ENSRNOG00000004009	XPNPEP2	chrX:135015009-135043522	3145	16470	7032.88	1972.07	1870.95	6732.41	-2.29589	0.425645	-5.39392	6.89383e-08	6.23362e-06
ENSRNOG00000036732	GATA5	chr3:181406296-181414482	2085	2165.72	1219.57	267.211	312.578	977.512	-2.29782	0.387506	-5.92977	3.03361e-09	3.96223e-07
ENSRNOG00000009734	AKR1B8	chr4:61491247-61503814	985	6769.92	3336.67	796.065	898.238	2907.03	-2.30184	0.403174	-5.70929	1.13449e-08	1.26008e-06
ENSRNOG00000009031	GUCY2C	chr4:234917957-234998564	3770	9583.73	3608.26	1007.61	1051.71	3753.2	-2.31122	0.448233	-5.1563	2.51878e-07	1.8602e-05
ENSRNOG00000020939	MS4A8	chr1:234203004-234216599	1181	15963.3	7308.35	1961.63	1856.28	6670.94	-2.31303	0.41317	-5.59826	2.16515e-08	2.22931e-06
ENSRNOG00000013663	TMEM86A	chr1:104238666-104243015	1729	49824.2	20395.1	5841.75	5317.21	20031.4	-2.31907	0.432783	-5.35852	8.39077e-08	7.49115e-06
ENSRNOG00000020377	CIDEB	chr15:38320521-38332605	1272	6397.08	2406.8	704.211	659.009	2501.85	-2.31925	0.449623	-5.15821	2.49328e-07	1.85106e-05
ENSRNOG00000005420	ABCG8	chr6:7897004-7916593	4829	6415.85	2602.09	722.304	695.119	2568.53	-2.3258	0.436742	-5.32533	1.00771e-07	8.72071e-06
ENSRNOG00000011300	LAMA3	chr18:3867376-3939230	5205	568.018	598.791	101.596	102.688	339.088	-2.32978	0.340761	-6.83701	8.08645e-12	1.8398e-09
ENSRNOG00000036760	TMC5	chr1:195224592-195282791	2475	2040.61	1607.55	237.985	381.413	1053.52	-2.33124	0.374176	-6.23035	4.65408e-10	6.98409e-08
ENSRNOG00000001765	SLC51A	chr11:74617802-74632201	1603	21203.1	10207.9	2461.26	2665.38	8999.55	-2.33483	0.404027	-5.7789	7.51911e-09	8.76566e-07
ENSRNOG00000010940	ACAD11	chr8:111982415-112062756	3459	4754.33	1811.89	522.592	481.844	1863.12	-2.33488	0.448894	-5.20141	1.97777e-07	1.53288e-05
ENSRNOG00000050185	ENPEP	chr2:252991592-253065721	3384	41384	14377.4	4036.69	4317.41	15772.8	-2.33874	0.459742	-5.08708	3.63619e-07	2.5646e-05
ENSRNOG00000028541	BTNL2	chr20:6223458-6235116	1542	608.054	609.137	94.6371	116.229	352.857	-2.33884	0.347316	-6.73405	1.65004e-11	3.56784e-09
ENSRNOG00000018436	APOA5	chr8:49185439-49187493	1600	93.8355	25.8657	4.87103	4.51376	31.9529	-2.34002	0.611312	-3.82787	0.000129259	0.00378283
ENSRNOG00000008754	FLVCR2	chr6:118780171-118989790	3106	2065.63	994.536	212.238	274.211	873.692	-2.34035	0.421552	-5.55175	2.82827e-08	2.8203e-06
ENSRNOG00000019510	TM4SF5	chr10:56869486-56875879	951	26529.2	10002.3	2381.93	3114.49	10342.3	-2.34773	0.453	-5.18264	2.18773e-07	1.67718e-05
ENSRNOG00000022919	CHST8	chr1:91681356-91822788	2057	414.127	269.003	62.6275	45.1376	195.071	-2.35421	0.417139	-5.64371	1.66422e-08	1.77844e-06
ENSRNOG00000003289	LAP3	chr14:70145276-70164260	2186	72901.4	28377.2	8357.99	7009.87	28706.9	-2.35707	0.443305	-5.31703	1.05473e-07	9.07197e-06
ENSRNOG00000037798	ERICH4	chr1:83669399-83671140	937	2178.24	1184.65	268.602	277.596	963.561	-2.36089	0.390285	-6.04914	1.4562e-09	1.99428e-07
ENSRNOG00000012196	ASAH2	chr1:257793171-257864321	2437	5454.97	1482.1	507.979	429.936	1935.64	-2.36534	0.500015	-4.73055	2.23917e-06	0.000123382
ENSRNOG00000037073	CLEC2E	chr4:211495902-211501065	645	43.7899	31.0388	2.78344	3.38532	19.9861	-2.36941	0.609426	-3.88794	0.0001011	0.00310027
ENSRNOG00000014610	ANPEP	chr1:142522425-142540882	3320	172585	66887.4	20733.2	14332.3	67561.8	-2.38145	0.453323	-5.25331	1.49386e-07	1.21806e-05
ENSRNOG00000017917	CDHR2	chr17:12541002-12565478	4005	32882.5	14296	3750	3483.49	13396.5	-2.38402	0.422055	-5.64859	1.61766e-08	1.74189e-06
ENSRNOG00000000565	SGPL1	chr20:32497279-32543194	1955	1558.92	1060.49	203.887	230.202	753.09	-2.38547	0.356179	-6.69737	2.12199e-11	4.27612e-09
ENSRNOG00000013236	SAMD8	chr15:2670862-2712120	1531	1642.75	556.112	160.048	146.697	616.422	-2.38743	0.476212	-5.01337	5.34842e-07	3.58422e-05
ENSRNOG00000022505	SLC17A4	chr17:45316865-45323260	1230	481.689	303.922	51.4937	69.9633	223.666	-2.39237	0.414451	-5.77237	7.81633e-09	9.03747e-07
ENSRNOG00000013407	SLC5A11	chr1:200246620-200285416	2095	4338.95	1689.03	429.346	454.761	1701.1	-2.39438	0.445725	-5.37187	7.7923e-08	7.00115e-06
ENSRNOG00000014314	SLC39A4	chr7:117663813-117667986	2213	8790.51	2069.26	716.041	660.137	3006.22	-2.39596	0.515717	-4.64588	3.38633e-06	0.000174973
ENSRNOG00000015880	DPEP1	chr19:66688899-66704281	2179	31308.5	9738.43	3197.48	2406.96	11471.3	-2.40139	0.481848	-4.9837	6.23792e-07	4.09266e-05
ENSRNOG00000015567	SLC9A2	chr9:47069437-47174866	3743	7311.66	3222.86	755.705	829.403	2984.28	-2.40678	0.422603	-5.69513	1.23278e-08	1.35857e-06
ENSRNOG00000045947	ACSBG2	chr9:9157943-9201477	995	46.2922	12.9328	1.39172	0	14.7464	-2.40986	0.652089	-3.69561	0.000219364	0.00583839
ENSRNOG00000015992	CCL20	chr9:88662801-88665357	774	685.625	451.356	106.467	66.578	323.078	-2.41652	0.409911	-5.89524	3.74143e-09	4.75465e-07
ENSRNOG00000012371	CAR7	chr19:630355-762115	1534	158.895	77.5971	17.3965	12.4128	65.5222	-2.41845	0.519154	-4.65845	3.18598e-06	0.000165836
ENSRNOG00000025420	CMTM2A	chr19:878306-885427	953	30.0274	19.3993	0.695861	0	12.3316	-2.41942	0.65039	-3.71996	0.000199258	0.00542612
ENSRNOG00000002397	SLC30A10	chr13:108069777-108080242	2243	106.347	84.0635	6.26275	15.7982	52.3389	-2.42256	0.535878	-4.52073	6.16278e-06	0.000292701
ENSRNOG00000022701	CEACAM18	chr1:100630243-100644423	1146	5890.37	1647.64	487.799	494.257	2094.39	-2.42455	0.494333	-4.90469	9.35735e-07	5.84047e-05
ENSRNOG00000015958	SLC19A3	chr9:88510652-88561257	1446	47.5433	38.7985	4.87103	2.25688	23.2084	-2.42957	0.601854	-4.03681	5.41822e-05	0.00183725
ENSRNOG00000007319	TRIB3	chr3:154162212-154167791	1415	421.634	239.258	41.0558	54.1651	186.344	-2.44077	0.434932	-5.61184	2.00184e-08	2.09484e-06
ENSRNOG00000004672	SEC14L2	chr14:85017261-85037193	2589	12685.3	5640.01	1379.2	1295.45	5170.61	-2.45229	0.419043	-5.85213	4.85326e-09	5.90174e-07
ENSRNOG00000004188	LOC298795	chr6:33617272-33618544	1272	860.785	353.067	65.4109	97.0458	338.722	-2.45696	0.469842	-5.22935	1.70111e-07	1.34055e-05
ENSRNOG00000051298	RN50_X_0713.4	chrX:71294021-71294615	594	180.164	69.8374	17.3965	10.156	68.167	-2.46351	0.54549	-4.51614	6.29776e-06	0.000298108
ENSRNOG00000003330	ACSF2	chr10:82104325-82146073	3083	10474.5	4274.31	1198.27	848.587	4133.95	-2.46385	0.44567	-5.52842	3.23133e-08	3.16536e-06
ENSRNOG00000003094	CMAH	chr17:44449939-44506535	2190	11870.8	5306.35	1269.25	1202.92	4838.31	-2.47161	0.418115	-5.91131	3.39387e-09	4.35218e-07
ENSRNOG00000033153	SFN	chr5:155513266-155514013	747	2134.45	1006.18	205.975	242.615	883.953	-2.47451	0.420848	-5.87981	4.1073e-09	5.12721e-07
ENSRNOG00000016953	CHST4	chr19:52455334-52463987	2222	405.369	160.367	38.9682	31.5963	156.528	-2.47613	0.490286	-5.05039	4.4092e-07	3.01923e-05
ENSRNOG00000005210	GNAI1	chr4:13388236-13470279	1737	250.228	219.858	18.7883	42.8807	131.4	-2.48262	0.465517	-5.33304	9.6584e-08	8.40997e-06
ENSRNOG00000043866	AY172581.24	chrM:1093-2664	1571	185024	91344.7	22209.1	17574.3	77878	-2.49565	0.404709	-6.16652	6.98111e-10	1.00485e-07
ENSRNOG00000008706	TBX3	chr12:44328561-44340709	3203	349.068	358.24	38.9682	63.1926	199.947	-2.49621	0.403891	-6.1804	6.3939e-10	9.39503e-08
ENSRNOG00000013053	TRPM6	chr1:241579362-241696522	6084	482.94	241.844	41.7517	55.2936	202.507	-2.50089	0.448888	-5.5713	2.52846e-08	2.56593e-06
ENSRNOG00000016286	IYD	chr1:41435346-41449794	1374	127.616	68.5441	11.8296	10.156	53.9678	-2.5009	0.524565	-4.76757	1.86466e-06	0.000107799
ENSRNOG00000002800	GDPD2	chrX:71435187-71443913	2439	2188.24	845.808	219.892	180.55	845.334	-2.50366	0.455023	-5.50227	3.74922e-08	3.61442e-06
ENSRNOG00000025970	LOC102551819	chr9:84307441-84310603	2337	41.2876	47.8515	4.17517	3.38532	23.7456	-2.51143	0.592987	-4.23523	2.28322e-05	0.000897134
ENSRNOG00000005596	GDPD1	chr10:75724330-75767811	1409	5085.89	2130.04	462.052	519.082	2017.92	-2.51354	0.433713	-5.79539	6.81639e-09	8.01266e-07
ENSRNOG00000019260	CEACAM20	chr1:82145623-82177339	1780	385.351	378.932	61.2358	51.9082	216.695	-2.52056	0.368291	-6.84395	7.70385e-12	1.78148e-09
ENSRNOG00000000096	PDZK1	chr2:218452669-218484881	1980	15081.2	5411.1	1460.61	1191.63	5694.26	-2.52135	0.458594	-5.49799	3.84139e-08	3.66126e-06
ENSRNOG00000010060	PANX1	chr8:13507954-13547151	2902	3420.62	1266.13	332.622	273.082	1302.36	-2.52283	0.458575	-5.50146	3.76662e-08	3.61442e-06
ENSRNOG00000006873	DNASE1	chr10:10512148-10515087	1290	84719.7	26314.5	7998.92	5510.17	30624.4	-2.53075	0.485443	-5.21329	1.85523e-07	1.45388e-05
ENSRNOG00000047503	APOC3	chr8:49155537-49157569	390	7431.77	1738.17	562.256	461.532	2504.38	-2.53292	0.51845	-4.88556	1.03137e-06	6.27088e-05
ENSRNOG00000047304	BTNL5	chr20:4821315-4830921	1944	3262.97	1453.65	356.281	278.725	1317.82	-2.53333	0.430251	-5.88803	3.90836e-09	4.92244e-07
ENSRNOG00000030020	ALPI	chr9:93903653-93934229	2226	32996.3	10729.1	2761.18	2717.28	12101.1	-2.53482	0.469756	-5.39605	6.8125e-08	6.19981e-06
ENSRNOG00000042607	LOC687609	chr12:40778914-40791466	636	459.168	271.59	45.9268	53.0367	204.622	-2.54632	0.419182	-6.07451	1.24365e-09	1.7543e-07
ENSRNOG00000005743	DAPL1	chr3:50655567-50675511	557	35.0319	37.5053	3.47931	0	18.7935	-2.54881	0.635617	-4.00998	6.07235e-05	0.00203944
ENSRNOG00000051245	RN50_X_0713.5	chrX:71293168-71294013	845	168.904	89.2366	11.8296	16.9266	70.7209	-2.54893	0.508473	-5.01291	5.36134e-07	3.58422e-05
[truncated: 115 more rows]

## Sheet: 12N-12A
gene_id	Symbol	locus	length	A_12A	A_12B	N_12A	N_12B	baseMean	log2FoldChange	lfcSE	stat	pvalue	padj
[truncated: 3,145 more rows]
