# Supplementary material for: Identifying the Growth Factors for Improving Neointestinal Regeneration in Rats through Transcriptome Analysis Using RNA-Seq Data
Source: Biomed Res Int. 2018 Dec 13;2018:4037865. doi: 10.1155/2018/4037865 (PMC6311312; doi:10.1155/2018/4037865)
Supplement: Supplementary Materials — Suppl. Table 1: Gene Ontology analysis on week 1 “A” condition upregulated genes. Suppl. Table 2: Gene Ontology analysis on week 1 “N” condition upregulated genes. Suppl. Table 3: Oligonucleotide sequences for qPCR validation of gene expression. Suppl. Figure 1: Flowchart of this study. Suppl. Figure 2: Stage specific genomic analysis for week 1 “N” or week 1 “A” conditions. Suppl. Figure 3: Stage specific genomic analysis for 1-, 4-, and 12-week “N” vs. “A” conditions. Suppl. Dataset 1: A_stage_specific.xlsx. Suppl. Dataset 2: N_stage_specific.xlsx. Suppl. Dataset 3: NvsA.xlsx. Suppl. Dataset 4: GF_time_matrix.xlsx. [file 4037865.f1.zip › S4_GF_time_matrix.xlsx]

## Sheet: 1week
gene_id	Symbol	locus	length	A-1A	A-1B	N-1A	N-1B	baseMean	log2FoldChange	pvalue	padj
ENSRNOG00000010208	TIMP1	chrX:2179962-2184589	765	2707.73	5505.64	22461.3	37345.2	16588.7	2.6288	1.92e-09	1.03e-07
ENSRNOG00000017560	MDK	chr3:87539672-87541584	721	374.364	577.596	2178.28	4096.96	1761.69	2.51037	2.11e-09	1.11e-07
ENSRNOG00000004517	IGF1	chr7:28528239-28602541	757	425.646	916.067	3789.5	5725.45	2649.7	2.59068	4.27e-09	2.09e-07
ENSRNOG00000019138	CLEC11A	chr1:101355486-101358626	1925	83.9754	168.658	873.579	663.643	439.247	2.38971	6.44e-08	1.99e-06
ENSRNOG00000009867	TGFB3	chr6:119222051-119243828	2619	279.491	351.178	1130.37	999.138	677.587	1.6522	6.21e-07	1.31e-05
ENSRNOG00000020652	TGFB1	chr1:83742150-83758471	1456	763.471	810.944	2399.83	2186.84	1513.8	1.45905	6.6e-07	1.38e-05
ENSRNOG00000002381	BMP3	chr14:12306369-12331030	2158	217.31	324.609	47.8329	63.6706	163.477	-2.16767	8.68e-07	1.73e-05
ENSRNOG00000016571	NGF	chr2:224316240-224369656	1068	16.0258	38.1213	137.205	226.52	101.982	2.40081	1.53e-05	0.000199079
ENSRNOG00000008525	CSF3	chr10:86413102-86415475	1294	3.20517	40.4317	258.046	357.535	160.63	3.02993	1.57e-05	0.000203742
ENSRNOG00000033209	BMP8B	chr5:144594117-144611108	1200	60.8982	54.294	3.1469	7.34661	31.2709	-2.89374	2.17e-05	0.000266621
ENSRNOG00000010917	BMP5	chr8:82266948-82526447	3708	202.567	169.813	25.8046	53.8751	112.945	-2.0723	3.1e-05	0.000361413
ENSRNOG00000029148	PDGFD	chr8:4454375-4684425	3234	40.3851	77.3978	281.333	217.949	151.275	1.88666	8.13e-05	0.000815136
ENSRNOG00000018659	CSF1	chr2:229989434-230017945	3953	515.391	584.527	1564.64	1251.37	963.63	1.26984	8.95e-05	0.000885502
ENSRNOG00000003833	NENF	chr13:114555780-114562973	654	832.062	675.787	1632.61	2819.87	1459.13	1.44405	0.00011788	0.00111359
ENSRNOG00000010278	IL6	chr4:3095535-3100112	1045	12.8207	80.8634	266.857	493.447	208.13	2.4803	0.000134847	0.00124798
ENSRNOG00000020097	INHA	chr9:82469742-82472643	1398	48.0775	60.0699	153.569	216.725	117.318	1.61392	0.000321657	0.00260021
ENSRNOG00000030155	BMP8A	chr5:144797124-144823640	1919	42.9493	34.6557	3.1469	4.89774	21.5028	-2.57357	0.000414461	0.00321484
ENSRNOG00000007810	GDF6	chr5:27786776-27805029	3507	26.2824	41.5869	176.226	111.424	87.2768	1.83871	0.000456861	0.00349349
ENSRNOG00000021156	VEGFB	chr1:229229800-229233423	1786	358.979	286.487	662.108	975.874	559.802	1.24286	0.000586003	0.00426602
ENSRNOG00000016182	TGFA	chr4:182534325-182616713	4222	397.441	515.215	163.639	215.5	321.541	-1.24914	0.000777267	0.00542004
ENSRNOG00000002418	TGFB2	chr13:109681281-109791576	2865	62.1803	102.812	263.71	224.071	160.566	1.41892	0.00137994	0.00875334
ENSRNOG00000006901	CD320	chr7:18878074-18883844	1173	849.37	769.357	1459.53	1954.2	1236.17	0.998275	0.00162239	0.0100184
ENSRNOG00000019740	HDGFRP3	chr1:144646622-144694902	2746	215.387	240.28	531.826	466.509	357.943	1.05121	0.00198074	0.0118106
ENSRNOG00000014948	OSGIN1	chr19:62825693-62834030	1984	968.602	758.961	297.697	498.345	626.544	-1.1074	0.0038039	0.0202675
ENSRNOG00000005650	PGF	chr6:116552659-116563240	1561	96.7961	92.4153	165.527	263.253	151.627	1.06469	0.0131683	0.0558275
ENSRNOG00000021276	BMP2	chr3:132822228-132830717	1253	44.8724	63.5355	20.1402	13.4688	35.461	-1.50679	0.0157312	0.0642738
ENSRNOG00000015331	GDF3	chr4:222441202-222445535	1917	5.12827	2.31038	40.9097	13.4688	15.0123	1.96588	0.0166384	0.0672322
ENSRNOG00000042753	FGF13	chrX:142078584-142189620	2005	55.7699	41.5869	13.217	18.3665	32.105	-1.45391	0.0200935	0.0781093
ENSRNOG00000020783	NTF4	chr1:102484723-102487555	1326	14.1027	6.93115	35.8747	45.3041	24.9649	1.55004	0.0241415	0.0898949
ENSRNOG00000018462	RABEP2	chr1:204820052-204836433	2199	533.34	406.627	767.214	870.573	634.492	0.731859	0.0260589	0.0954488
ENSRNOG00000019716	NTF3	chr4:225638801-225707718	1413	70.5137	68.1563	18.252	35.5086	47.975	-1.23891	0.0328797	0.114419
ENSRNOG00000017386	IL11	chr1:75891523-75897820	1674	14.1027	85.4841	125.876	211.827	107.05	1.41416	0.0358237	0.122758
ENSRNOG00000024390	OSM	chr14:85147854-85150705	720	7.05137	21.9486	66.0849	34.2842	31.794	1.38708	0.0518164	0.163131
ENSRNOG00000020142	GDF1	chr16:20698223-20699716	1074	25.0003	32.3454	56.0148	80.8127	47.6175	1.08067	0.053636	0.167795
ENSRNOG00000005386	KITLG	chr7:42337400-42383921	5099	1187.84	1396.63	957.287	975.874	1120.2	-0.448979	0.136545	0.328335
ENSRNOG00000017197	PDGFB	chr7:121205505-121223140	1705	76.283	155.951	340.495	124.892	172.483	0.851767	0.137374	0.329645
ENSRNOG00000012278	FGF10	chr2:70046330-70120384	648	1.28207	0	8.18194	4.89774	3.42807	1.28537	0.140288	1
ENSRNOG00000019661	GDF15	chr16:20411166-20413750	912	26.2824	35.8109	73.0081	50.2018	45.6393	0.834609	0.146505	0.343228
ENSRNOG00000006486	REG1A	chr4:174199390-174202509	1220	2576.31	2961.91	1412.33	10473.8	4254.73	0.888275	0.157756	0.359178
ENSRNOG00000010695	PDGFC	chr2:199362290-199537365	1116	35.8979	98.1912	45.9447	7.34661	46.809	-1.04049	0.169209	0.375913
ENSRNOG00000009468	IL12A	chr2:184430743-184437696	793	20.5131	26.5694	12.5876	9.79547	17.6746	-0.869338	0.229112	0.457627
ENSRNOG00000007610	GDF11	chr7:3280684-3286883	1218	0	5.77596	16.3639	8.57104	7.63558	1.00041	0.258839	0.493802
ENSRNOG00000019377	AMH	chr7:11942869-11945218	1662	5.7693	2.31038	11.9582	12.2443	7.84903	0.963157	0.260782	0.495604
ENSRNOG00000045797	LEP	chr4:56085078-56099209	3290	6.41034	8.08634	10.6995	24.4887	12.0006	0.901044	0.261956	0.497058
ENSRNOG00000014320	INHBA	chr17:49965504-49978776	1546	0	3.46557	10.6995	3.6733	4.43969	0.92573	0.291105	1
ENSRNOG00000017348	IL2	chr2:143460865-143465570	740	2.56414	5.77596	1.25876	1.22443	2.75205	-0.871036	0.318661	1
ENSRNOG00000013370	GFER	chr10:13876327-13878685	1227	846.165	815.565	543.784	800.78	743.924	-0.337925	0.321886	0.562963
ENSRNOG00000017602	IL34	chr19:51714802-51728622	1524	346.158	310.746	393.992	446.918	369.591	0.301927	0.358811	0.598098
ENSRNOG00000012819	GDNF	chr2:76897560-76919745	700	0.641034	5.77596	1.88814	0	2.26123	-0.525799	0.518022	1
ENSRNOG00000050123	GDF5	chr3:157849769-157852905	893	5.7693	3.46557	3.1469	1.22443	3.23495	-0.529414	0.547974	1
ENSRNOG00000042728	FBRS	chr1:205933260-205938141	1401	221.798	219.486	251.752	110.199	199.409	-0.292699	0.548683	0.752746
ENSRNOG00000007365	IL22	chr7:61232295-61236761	540	10.8976	0	2.51752	1.22443	3.72124	-0.502819	0.551684	1
ENSRNOG00000001931	FGF12	chr11:78947042-79210052	732	10.2565	8.08634	7.55256	22.0398	11.7745	0.481662	0.552381	0.756101
ENSRNOG00000019598	VEGFA	chr9:16232414-16247655	3471	1955.79	1914.15	1587.93	1943.18	1830.45	-0.171623	0.559294	0.760003
ENSRNOG00000020899	FGF19	chr1:224927790-224931079	657	1.9231	0	0	0	0.498035	-0.316945	0.571029	1
ENSRNOG00000014201	MANF	chr8:114982001-114985213	853	5662.89	5007.75	5046.37	7502.11	5726.09	0.181257	0.580131	0.773938
ENSRNOG00000008960	FGF22	chr7:12999988-13001879	489	0	0	1.25876	1.22443	0.487422	0.30667	0.583841	1
ENSRNOG00000026786	IL3	chr10:39397781-39400192	553	0	0	0.62938	1.22443	0.487422	0.30667	0.583841	1
ENSRNOG00000019842	ARTN	chr5:140548765-140552035	1331	57.693	45.0525	46.5741	86.9348	58.3379	0.296361	0.591598	0.781263
ENSRNOG00000020990	FGF21	chr1:102674358-102675602	627	6.41034	3.46557	5.66442	8.57104	5.89774	0.407066	0.640764	1
ENSRNOG00000006046	GDF7	chr6:43288342-43292667	1660	1.28207	2.31038	0	1.22443	0.994983	-0.311737	0.660706	1
ENSRNOG00000007002	LIF	chr14:85177765-85180540	609	5.12827	16.1727	11.9582	2.44887	8.73996	-0.363049	0.677379	0.838512
ENSRNOG00000026805	CSF2	chr10:39379307-39381289	441	4.48724	2.31038	2.51752	0	2.24388	-0.313169	0.702823	1
ENSRNOG00000017392	FGF2	chr2:143689406-143742070	1016	1.28207	4.62076	4.40566	6.12217	3.94357	0.326211	0.712533	1
ENSRNOG00000014882	FGF11	chr10:56150463-56153978	678	1.9231	2.31038	1.88814	0	1.49853	-0.256802	0.73975	1
ENSRNOG00000004380	IL12B	chr10:29872452-29881829	1008	1.9231	2.31038	1.88814	0	1.49853	-0.256802	0.73975	1
ENSRNOG00000049171	PSPN	chr9:9045405-9045964	471	8.97447	8.08634	7.55256	14.6932	9.84471	0.26886	0.742459	0.877802
ENSRNOG00000005015	RABEP1	chr10:57207872-57324847	3467	768.6	928.774	807.494	849.757	830.14	-0.0766824	0.80544	0.91363
ENSRNOG00000048389	FGF18	chr10:17932879-17948600	557	3.20517	2.31038	5.03504	2.44887	2.9697	0.199008	0.821076	1
ENSRNOG00000007301	GDF9	chr10:38570720-38574669	1388	1.9231	0	1.25876	0	0.74535	-0.118295	0.837297	1
ENSRNOG00000026493	CDNF	chr17:80366183-80379144	624	0.641034	2.31038	1.88814	0	1.24951	-0.136933	0.853262	1
ENSRNOG00000013927	JAG2	chr6:146708460-146729480	3678	49.3596	122.45	117.694	72.2416	89.5302	0.0967452	0.866829	0.938329
ENSRNOG00000001164	TFF1	chr20:12071834-12075695	462	1.9231	1.15519	1.88814	2.44887	1.72581	0.127289	0.879465	1
ENSRNOG00000009316	BMP10	chr4:183788757-183793766	1266	8.33344	1.15519	5.66442	4.89774	4.92949	0.129382	0.883916	1
ENSRNOG00000012460	CNTF	chr1:236752365-236754389	1094	89.1037	51.9836	67.3437	82.0371	71.5738	0.0344178	0.946739	0.976947
ENSRNOG00000001312	PDGFA	chr12:19727663-19748066	1102	458.339	620.338	436.16	670.99	539.807	-0.00965537	0.979813	0.991647
ENSRNOG00000021294	MSTN	chr9:52975921-52982322	2704	0.641034	1.15519	0.62938	1.22443	0.989369	-0.0104248	0.989101	1
ENSRNOG00000001499	MIA	chr1:85202540-85204208	545	21.1541	0	5.03504	17.1421	10.5478	0.0117652	0.989401	0.995621
ENSRNOG00000037171	TDGF1	chr8:118555009-118558562	516	3.20517	0	1.25876	2.44887	1.47458	-0.00948192	0.990061	1
ENSRNOG00000003263	LEFTY2	chr13:104212317-104215251	1108	0	1.15519	1.25876	0	0.500245	-0.00277088	0.996043	1
ENSRNOG00000002984	BMP15	chrX:17797359-17802423	1441	0.641034	0	0.62938	0	0.496333	-0.00274044	0.996086	1
ENSRNOG00000007624	IL4	chr10:38745705-38751258	475	1.28207	0	0.62938	0	0.496333	-0.00274044	0.996086	1
ENSRNOG00000023150	GPI	chr1:91207013-91234890	2014	12770.7	10923.5	10263.3	14204.7	11892.1	0.0013432	0.996587	0.998713
ENSRNOG00000003718	AMBN	chr14:21151295-21164251	1872	0	0	0	0	0	0	1	1
ENSRNOG00000002782	EPGN	chr14:18536110-18542821	462	0	0	0	0	0	0	1	1
ENSRNOG00000012912	FGF17	chr15:56050173-56055493	651	0	0	0	0	0	0	1	1
ENSRNOG00000020888	FGF3	chr1:224872402-224876327	738	0	0	0	0	0	0	1	1
ENSRNOG00000020890	FGF4	chr1:224895195-224896606	587	0	0	0	0	0	0	1	1
ENSRNOG00000022631	FGF5	chr14:12917741-12938405	801	0	0	0	0	0	0	1	1
ENSRNOG00000017524	FGF8	chr1:272923588-272929296	615	0	0	0	0	0	0	1	1
ENSRNOG00000008111	IL5	chr10:38848653-38851525	399	0	0	0	0	0	0	1	1
ENSRNOG00000012131	IL9	chr17:10733180-10736304	563	0	0	0	0	0	0	1	1
ENSRNOG00000007700	INHBC	chr7:70822284-70835753	1981	0	0	0	0	0	0	1	1
ENSRNOG00000000556	NODAL	chr20:32822879-32831247	2034	0	1.15519	0	0	0	0	1	1
ENSRNOG00000018201	PROK1	chr2:229457382-229462641	318	0	0	0	0	0	0	1	1

## Sheet: 4week
gene_id	Symbol	locus	length	A-4A	A-4B	N-4A	N-4B	log2FoldChange	pvalue	padj
ENSRNOG00000033209	BMP8B	chr5:144594117-144611108	1200	256.484	140.968	2.78344	3.38532	-4.52918	1.75654e-17	9.52988e-15
ENSRNOG00000030155	BMP8A	chr5:144797124-144823640	1919	175.16	104.756	0	1.12844	-4.78808	1.33411e-16	6.48928e-14
ENSRNOG00000009867	TGFB3	chr6:119222051-119243828	2619	316.538	615.603	3111.2	2171.12	2.20013	1.47445e-07	1.21629e-05
ENSRNOG00000019598	VEGFA	chr9:16232414-16247655	3471	3501.94	2790.91	970.726	1188.25	-1.4431	1.03027e-05	0.000451335
ENSRNOG00000016182	TGFA	chr4:182534325-182616713	4222	568.018	407.385	175.357	255.027	-1.06948	0.00558399	0.073891
ENSRNOG00000016571	NGF	chr2:224316240-224369656	1068	7.50684	53.0247	175.357	104.945	1.53479	0.00979871	0.112649
ENSRNOG00000029148	PDGFD	chr8:4454375-4684425	3234	37.5342	148.728	366.023	238.101	1.31448	0.0143305	0.147984
ENSRNOG00000014948	OSGIN1	chr19:62825693-62834030	1984	2111.92	544.473	514.241	467.174	-1.16621	0.0218608	0.195666
ENSRNOG00000005650	PGF	chr6:116552659-116563240	1561	83.8264	116.396	242.16	162.495	0.887016	0.0354685	0.272802
ENSRNOG00000003833	NENF	chr13:114555780-114562973	654	676.867	1091.53	2146.73	1283.04	0.840995	0.040047	0.293151
ENSRNOG00000021276	BMP2	chr3:132822228-132830717	1253	80.073	59.4911	25.051	34.9816	-1.0055	0.0414291	0.299692
ENSRNOG00000007810	GDF6	chr5:27786776-27805029	3507	15.0137	90.5299	141.26	188.449	1.1744	0.0435194	0.307364
ENSRNOG00000019842	ARTN	chr5:140548765-140552035	1331	58.8036	50.4381	114.817	93.6605	0.816789	0.0593303	0.366279
ENSRNOG00000042728	FBRS	chr1:205933260-205938141	1401	263.991	301.335	167.703	180.55	-0.645014	0.0697863	0.39774
ENSRNOG00000017560	MDK	chr3:87539672-87541584	721	391.607	1055.32	2376.37	891.468	0.933527	0.0717871	0.402693
ENSRNOG00000021156	VEGFB	chr1:229229800-229233423	1786	233.963	346.6	571.302	413.009	0.677444	0.081453	0.424983
ENSRNOG00000006901	CD320	chr7:18878074-18883844	1173	683.123	646.642	1233.07	861	0.599812	0.0832053	0.427969
ENSRNOG00000019740	HDGFRP3	chr1:144646622-144694902	2746	176.411	359.533	525.375	441.22	0.735548	0.0866555	0.438069
ENSRNOG00000020783	NTF4	chr1:102484723-102487555	1326	5.00456	15.5194	42.4475	19.1835	0.977857	0.117744	0.503509
ENSRNOG00000010695	PDGFC	chr2:199362290-199537365	1116	48.7945	98.2896	22.9634	47.3945	-0.841599	0.120076	0.508189
ENSRNOG00000009468	IL12A	chr2:184430743-184437696	793	20.0182	21.9858	34.0972	54.1651	0.82927	0.124164	0.516649
ENSRNOG00000020142	GDF1	chr16:20698223-20699716	1074	23.7717	31.0388	70.9778	39.4954	0.786548	0.137051	0.53872
ENSRNOG00000013370	GFER	chr10:13876327-13878685	1227	795.725	532.833	1025.7	929.835	0.510937	0.147046	0.55502
ENSRNOG00000018659	CSF1	chr2:229989434-230017945	3953	427.89	1015.23	1393.81	1052.83	0.647817	0.148084	0.555765
ENSRNOG00000010917	BMP5	chr8:82266948-82526447	3708	316.538	159.074	123.863	163.624	-0.62903	0.155985	0.567296
ENSRNOG00000006486	REG1A	chr4:174199390-174202509	1220	66.3104	455.236	284.607	936.605	0.843213	0.160848	0.574324
ENSRNOG00000020097	INHA	chr9:82469742-82472643	1398	31.2785	100.876	163.527	91.4036	0.724934	0.184081	0.602329
ENSRNOG00000004517	IGF1	chr7:28528239-28602541	757	106.347	1337.26	1892.74	1241.28	0.747513	0.219839	0.638038
ENSRNOG00000020652	TGFB1	chr1:83742150-83758471	1456	553.004	1378.64	1807.15	1259.34	0.559509	0.222701	0.640976
ENSRNOG00000017602	IL34	chr19:51714802-51728622	1524	374.091	301.335	517.025	402.853	0.407282	0.248707	0.669016
ENSRNOG00000005015	RABEP1	chr10:57207872-57324847	3467	1198.59	960.91	818.333	837.303	-0.363273	0.256811	0.676127
ENSRNOG00000001312	PDGFA	chr12:19727663-19748066	1102	743.177	540.593	452.31	506.67	-0.392026	0.257454	0.676787
ENSRNOG00000002418	TGFB2	chr13:109681281-109791576	2865	56.3013	237.964	259.556	222.303	0.545335	0.312772	0.724042
ENSRNOG00000023150	GPI	chr1:91207013-91234890	2014	16630.2	9799.22	11341.1	9703.46	-0.301941	0.41188	0.791227
ENSRNOG00000019138	CLEC11A	chr1:101355486-101358626	1925	56.3013	1048.85	1338.14	1295.45	0.489742	0.444746	0.808919
ENSRNOG00000010208	TIMP1	chrX:2179962-2184589	765	680.62	6581.52	7222.34	4201.18	0.447348	0.452814	0.812638
ENSRNOG00000002381	BMP3	chr14:12306369-12331030	2158	148.886	93.1165	125.951	188.449	0.326034	0.454998	0.814315
ENSRNOG00000042753	FGF13	chrX:142078584-142189620	2005	48.7945	32.3321	30.6179	27.0826	-0.386102	0.463087	0.818098
ENSRNOG00000010278	IL6	chr4:3095535-3100112	1045	0	75.0105	18.7883	15.7982	-0.457739	0.47688	0.825542
ENSRNOG00000017197	PDGFB	chr7:121205505-121223140	1705	46.2922	153.901	139.172	109.459	0.234668	0.658515	0.899488
ENSRNOG00000024390	OSM	chr14:85147854-85150705	720	2.50228	40.0918	17.3965	13.5413	-0.262653	0.686923	0.912828
ENSRNOG00000019716	NTF3	chr4:225638801-225707718	1413	70.0639	27.159	48.7103	66.578	0.203088	0.705516	0.9208
ENSRNOG00000019661	GDF15	chr16:20411166-20413750	912	71.315	58.1978	61.2358	53.0367	-0.157022	0.729908	0.930705
ENSRNOG00000018462	RABEP2	chr1:204820052-204836433	2199	565.515	554.819	729.958	502.156	0.119865	0.734758	0.932696
ENSRNOG00000001499	MIA	chr1:85202540-85204208	545	10.0091	10.3463	10.4379	13.5413	0.160245	0.800367	0.948468
ENSRNOG00000049171	PSPN	chr9:9045405-9045964	471	15.0137	5.17314	18.0924	5.6422	0.143786	0.825068	0.954808
ENSRNOG00000005386	KITLG	chr7:42337400-42383921	5099	1331.21	1200.17	1041.7	1638.49	0.0716449	0.842816	0.959252
ENSRNOG00000013927	JAG2	chr6:146708460-146729480	3678	35.0319	91.8232	61.2358	78.9908	0.102398	0.84624	0.960955
ENSRNOG00000014201	MANF	chr8:114982001-114985213	853	4963.27	3969.09	4714.46	4580.34	0.0500986	0.871608	0.96665
ENSRNOG00000008525	CSF3	chr10:86413102-86415475	1294	0	71.1306	17.3965	37.2385	-0.0706546	0.885835	0.970806
ENSRNOG00000001931	FGF12	chr11:78947042-79210052	732	8.75798	11.6396	13.9172	9.02752	0.0758794	0.905014	0.974989
ENSRNOG00000017386	IL11	chr1:75891523-75897820	1674	25.0228	40.0918	34.0972	28.211	-0.0601949	0.911338	0.976553
ENSRNOG00000012460	CNTF	chr1:236752365-236754389	1094	81.3241	68.5441	77.2406	71.0917	-0.0210488	0.961083	0.988384
ENSRNOG00000003718	AMBN	chr14:21151295-21164251	1872	0	0	0	0	0	1	1
ENSRNOG00000019377	AMH	chr7:11942869-11945218	1662	3.75342	5.17314	13.2214	11.2844	0.772458	0.234246	1
ENSRNOG00000009316	BMP10	chr4:183788757-183793766	1266	5.00456	5.17314	6.95861	2.25688	-0.066379	0.917986	1
ENSRNOG00000002984	BMP15	chrX:17797359-17802423	1441	0	1.29328	0	0	0	1	1
ENSRNOG00000026493	CDNF	chr17:80366183-80379144	624	0	2.58657	0.695861	1.12844	-0.0924839	0.84489	1
ENSRNOG00000026805	CSF2	chr10:39379307-39381289	441	8.75798	6.46642	4.17517	1.12844	-0.645899	0.316343	1
ENSRNOG00000002782	EPGN	chr14:18536110-18542821	462	0	0	0.695861	3.38532	0.339685	0.400716	1
ENSRNOG00000012278	FGF10	chr2:70046330-70120384	648	0	2.58657	0.695861	3.38532	0.0753354	0.883206	1
ENSRNOG00000014882	FGF11	chr10:56150463-56153978	678	3.75342	1.29328	1.39172	1.12844	-0.298716	0.589721	1
ENSRNOG00000012912	FGF17	chr15:56050173-56055493	651	0	0	0	0	0	1	1
ENSRNOG00000048389	FGF18	chr10:17932879-17948600	557	1.25114	3.87985	4.17517	4.51376	0.293715	0.638613	1
ENSRNOG00000020899	FGF19	chr1:224927790-224931079	657	8.75798	9.05299	0	0	-1.29254	0.0350847	1
ENSRNOG00000017392	FGF2	chr2:143689406-143742070	1016	1.25114	7.75971	10.4379	9.02752	0.476473	0.463919	1
ENSRNOG00000020990	FGF21	chr1:102674358-102675602	627	1.25114	3.87985	2.78344	3.38532	0.0782847	0.897243	1
ENSRNOG00000008960	FGF22	chr7:12999988-13001879	489	0	0	0.695861	1.12844	0.180894	0.572353	1
ENSRNOG00000020888	FGF3	chr1:224872402-224876327	738	0	0	0	0	0	1	1
ENSRNOG00000020890	FGF4	chr1:224895195-224896606	587	0	0	0	0	0	1	1
ENSRNOG00000022631	FGF5	chr14:12917741-12938405	801	0	0	0	0	0	1	1
ENSRNOG00000017524	FGF8	chr1:272923588-272929296	615	0	0	0	0	0	1	1
ENSRNOG00000007610	GDF11	chr7:3280684-3286883	1218	1.25114	9.05299	6.26275	9.02752	0.2407	0.709387	1
ENSRNOG00000015331	GDF3	chr4:222441202-222445535	1917	0	5.17314	11.8296	6.77064	0.67745	0.2834	1
ENSRNOG00000050123	GDF5	chr3:157849769-157852905	893	0	2.58657	6.26275	2.25688	0.337955	0.551117	1
ENSRNOG00000006046	GDF7	chr6:43288342-43292667	1660	1.25114	0	3.47931	3.38532	0.47387	0.374591	1
ENSRNOG00000007301	GDF9	chr10:38570720-38574669	1388	3.75342	0	2.78344	0	-0.0570093	0.899931	1
ENSRNOG00000012819	GDNF	chr2:76897560-76919745	700	2.50228	0	1.39172	1.12844	-0.088243	0.851618	1
ENSRNOG00000004380	IL12B	chr10:29872452-29881829	1008	1.25114	1.29328	3.47931	4.51376	0.559173	0.350741	1
ENSRNOG00000017348	IL2	chr2:143460865-143465570	740	3.75342	3.87985	5.56689	2.25688	-0.00259175	0.996756	1
ENSRNOG00000007365	IL22	chr7:61232295-61236761	540	0	1.29328	0.695861	0	-0.000890118	0.99778	1
ENSRNOG00000026786	IL3	chr10:39397781-39400192	553	0	0	0	0	0	1	1
ENSRNOG00000007624	IL4	chr10:38745705-38751258	475	0	0	0.695861	0	0	1	1
ENSRNOG00000008111	IL5	chr10:38848653-38851525	399	0	0	0	0	0	1	1
ENSRNOG00000012131	IL9	chr17:10733180-10736304	563	0	0	0	0	0	1	1
ENSRNOG00000014320	INHBA	chr17:49965504-49978776	1546	0	5.17314	2.08758	2.25688	-0.0743429	0.890571	1
ENSRNOG00000007700	INHBC	chr7:70822284-70835753	1981	0	0	0	0	0	1	1
ENSRNOG00000003263	LEFTY2	chr13:104212317-104215251	1108	0	1.29328	0.695861	3.38532	0.292502	0.544328	1
ENSRNOG00000045797	LEP	chr4:56085078-56099209	3290	2.50228	9.05299	2.78344	6.77064	-0.1198	0.853384	1
ENSRNOG00000007002	LIF	chr14:85177765-85180540	609	10.0091	11.6396	2.08758	7.89908	-0.577392	0.376809	1
ENSRNOG00000021294	MSTN	chr9:52975921-52982322	2704	2.50228	2.58657	1.39172	1.12844	-0.406197	0.482972	1
ENSRNOG00000000556	NODAL	chr20:32822879-32831247	2034	0	0	0.695861	0	0	1	1
ENSRNOG00000018201	PROK1	chr2:229457382-229462641	318	0	0	0	0	0	1	1
ENSRNOG00000037171	TDGF1	chr8:118555009-118558562	516	0	0	2.08758	0	0.180714	0.572721	1
ENSRNOG00000001164	TFF1	chr20:12071834-12075695	462	0	2.58657	2.08758	1.12844	-0.00330449	0.994685	1

## Sheet: 12week
gene_id	Symbol	locus	length	A-12A	A-12B	N-12A	N-12B	log2FoldChange	pvalue	padj
ENSRNOG00000019138	CLEC11A	chr1:101355486-101358626	1925	78.2713	88.6209	661.072	712.699	2.86234	1.79241e-26	4.68417e-24
ENSRNOG00000033209	BMP8B	chr5:144594117-144611108	1200	121.638	118.161	1.96748	8.42434	-3.5929	1.71773e-12	8.50548e-11
ENSRNOG00000030155	BMP8A	chr5:144797124-144823640	1919	48.6551	85.8076	0	0.842434	-3.81147	1.55571e-10	5.73216e-09
ENSRNOG00000014948	OSGIN1	chr19:62825693-62834030	1984	1009.07	1090.18	413.826	396.787	-1.36584	6.10552e-10	2.06621e-08
ENSRNOG00000019598	VEGFA	chr9:16232414-16247655	3471	2305.83	2439.19	1432.32	1164.24	-0.8835	2.73778e-05	0.00034713
ENSRNOG00000009867	TGFB3	chr6:119222051-119243828	2619	257.026	569.706	967.999	1472.58	1.40275	7.2984e-05	0.000811623
ENSRNOG00000007810	GDF6	chr5:27786776-27805029	3507	10.5772	22.5069	72.1408	87.6132	1.77408	0.000391759	0.00341056
ENSRNOG00000018659	CSF1	chr2:229989434-230017945	3953	375.491	462.798	743.051	873.604	0.87686	0.000407865	0.00352251
ENSRNOG00000016182	TGFA	chr4:182534325-182616713	4222	572.227	533.132	342.341	358.035	-0.670406	0.00574332	0.0298966
ENSRNOG00000019740	HDGFRP3	chr1:144646622-144694902	2746	196.736	170.208	331.848	319.283	0.746982	0.00805684	0.0392875
ENSRNOG00000010208	TIMP1	chrX:2179962-2184589	765	595.496	749.761	892.579	1387.49	0.69078	0.0140566	0.0595682
ENSRNOG00000023150	GPI	chr1:91207013-91234890	2014	12241	15285	8995.31	10611.3	-0.509385	0.0170808	0.0689287
ENSRNOG00000014201	MANF	chr8:114982001-114985213	853	5767.75	6162.67	2884.32	4807.77	-0.635925	0.0178813	0.0716064
ENSRNOG00000029148	PDGFD	chr8:4454375-4684425	3234	38.0779	45.0138	86.569	96.0375	0.964774	0.0224184	0.0852055
ENSRNOG00000001312	PDGFA	chr12:19727663-19748066	1102	406.165	648.48	306.926	368.986	-0.634531	0.0341264	0.11599
ENSRNOG00000016571	NGF	chr2:224316240-224369656	1068	17.9812	18.2869	34.1029	64.025	1.08041	0.0444776	0.140224
ENSRNOG00000017197	PDGFB	chr7:121205505-121223140	1705	49.7128	54.8606	111.49	88.4556	0.781627	0.0544088	0.161548
ENSRNOG00000004380	IL12B	chr10:29872452-29881829	1008	0	0	9.18156	7.58191	1.09146	0.0582417	1
ENSRNOG00000010917	BMP5	chr8:82266948-82526447	3708	314.143	279.93	219.046	206.396	-0.495669	0.0757304	0.203022
ENSRNOG00000005386	KITLG	chr7:42337400-42383921	5099	1454.37	1489.68	2077.66	1743	0.327982	0.113333	0.270572
ENSRNOG00000004517	IGF1	chr7:28528239-28602541	757	87.7908	298.216	249.87	529.049	0.835385	0.0692961	0.190826
ENSRNOG00000042728	FBRS	chr1:205933260-205938141	1401	232.698	178.649	348.243	246.833	0.456191	0.14772	0.323449
ENSRNOG00000012819	GDNF	chr2:76897560-76919745	700	0	0	11.8049	2.5273	0.910627	0.0980914	1
ENSRNOG00000013927	JAG2	chr6:146708460-146729480	3678	46.5397	53.4539	94.4389	76.6615	0.644516	0.12394	0.287529
ENSRNOG00000012460	CNTF	chr1:236752365-236754389	1094	79.329	87.2142	52.4661	64.8674	-0.475624	0.25046	0.458132
ENSRNOG00000005015	RABEP1	chr10:57207872-57324847	3467	876.85	945.29	797.484	785.991	-0.233396	0.274464	0.48538
ENSRNOG00000017560	MDK	chr3:87539672-87541584	721	345.875	457.171	268.233	408.581	-0.261821	0.396208	0.606367
ENSRNOG00000001499	MIA	chr1:85202540-85204208	545	10.5772	12.6601	3.27913	10.1092	-0.468991	0.461025	0.662053
ENSRNOG00000021276	BMP2	chr3:132822228-132830717	1253	76.1559	70.3341	74.7641	45.4914	-0.279731	0.524358	0.714882
ENSRNOG00000019842	ARTN	chr5:140548765-140552035	1331	48.6551	57.6739	54.4335	83.401	0.275692	0.538569	0.725523
ENSRNOG00000019661	GDF15	chr16:20411166-20413750	912	33.847	21.1002	26.8889	48.0188	0.312394	0.564619	0.742696
ENSRNOG00000005650	PGF	chr6:116552659-116563240	1561	74.0404	140.668	100.997	165.117	0.24219	0.56466	0.742696
ENSRNOG00000007002	LIF	chr14:85177765-85180540	609	11.6349	12.6601	24.2656	12.6365	0.338964	0.57742	0.753139
ENSRNOG00000017602	IL34	chr19:51714802-51728622	1524	305.681	375.584	253.805	363.932	-0.165866	0.57956	0.754845
ENSRNOG00000009468	IL12A	chr2:184430743-184437696	793	22.2121	37.9804	42.6287	36.2247	0.284294	0.585265	0.758952
ENSRNOG00000021156	VEGFB	chr1:229229800-229233423	1786	213.659	232.102	224.292	279.688	0.132539	0.65232	0.805948
ENSRNOG00000003833	NENF	chr13:114555780-114562973	654	619.824	670.987	590.899	850.859	0.119093	0.653594	0.806901
ENSRNOG00000019716	NTF3	chr4:225638801-225707718	1413	92.0217	101.281	92.4714	82.5586	-0.162045	0.665503	0.815099
ENSRNOG00000020097	INHA	chr9:82469742-82472643	1398	22.2121	36.5737	30.8238	42.9641	0.228662	0.66591	0.815334
ENSRNOG00000020652	TGFB1	chr1:83742150-83758471	1456	609.247	655.513	533.186	874.447	0.112993	0.696603	0.837858
ENSRNOG00000018462	RABEP2	chr1:204820052-204836433	2199	480.205	464.205	396.775	510.515	-0.0884755	0.733864	0.859016
ENSRNOG00000006901	CD320	chr7:18878074-18883844	1173	680.114	807.435	618.444	818.846	-0.0805908	0.751086	0.869749
ENSRNOG00000017386	IL11	chr1:75891523-75897820	1674	17.9812	11.2535	15.084	20.2184	0.152236	0.801282	0.896795
ENSRNOG00000042753	FGF13	chrX:142078584-142189620	2005	60.2901	49.2338	70.8292	31.1701	-0.114091	0.817882	0.906389
ENSRNOG00000020142	GDF1	chr16:20698223-20699716	1074	22.2121	40.7938	28.2005	31.1701	-0.0979718	0.855972	0.926483
ENSRNOG00000013370	GFER	chr10:13876327-13878685	1227	868.388	976.237	807.977	1143.18	0.0447762	0.860846	0.928752
ENSRNOG00000002381	BMP3	chr14:12306369-12331030	2158	212.602	170.208	217.078	171.014	-0.0208055	0.947923	0.977072
ENSRNOG00000006486	REG1A	chr4:174199390-174202509	1220	111.061	2477.17	931.928	1611.58	-0.0166283	0.97839	0.990888
ENSRNOG00000003718	AMBN	chr14:21151295-21164251	1872	0	0	0	0	0	1	1
ENSRNOG00000019377	AMH	chr7:11942869-11945218	1662	4.23088	2.81336	3.93495	3.36974	-0.0137564	0.981701	1
ENSRNOG00000009316	BMP10	chr4:183788757-183793766	1266	2.11544	4.22004	1.31165	0.842434	-0.34756	0.514457	1
ENSRNOG00000002984	BMP15	chrX:17797359-17802423	1441	0	0	2.6233	0	0.194271	0.532004	1
ENSRNOG00000026493	CDNF	chr17:80366183-80379144	624	1.05772	1.40668	3.93495	0.842434	0.246178	0.629012	1
ENSRNOG00000026805	CSF2	chr10:39379307-39381289	441	5.2886	8.44009	1.31165	1.68487	-0.69247	0.252429	1
ENSRNOG00000008525	CSF3	chr10:86413102-86415475	1294	2.11544	0	0.655826	5.89704	0.321597	0.524091	1
ENSRNOG00000002782	EPGN	chr14:18536110-18542821	462	0	1.40668	1.31165	0.842434	0.0891565	0.810623	1
ENSRNOG00000012278	FGF10	chr2:70046330-70120384	648	0	0	1.96748	4.21217	0.426527	0.32143	1
ENSRNOG00000014882	FGF11	chr10:56150463-56153978	678	4.23088	0	5.24661	3.36974	0.223173	0.681507	1
ENSRNOG00000001931	FGF12	chr11:78947042-79210052	732	11.6349	4.22004	9.83739	8.42434	0.0623783	0.921933	1
ENSRNOG00000012912	FGF17	chr15:56050173-56055493	651	0	0	0.655826	0	0	1	1
ENSRNOG00000048389	FGF18	chr10:17932879-17948600	557	1.05772	0	0.655826	4.21217	0.311741	0.499453	1
ENSRNOG00000020899	FGF19	chr1:224927790-224931079	657	4.23088	0	0	0	-0.216205	0.505968	1
ENSRNOG00000017392	FGF2	chr2:143689406-143742070	1016	1.05772	4.22004	3.93495	1.68487	0.0616093	0.913212	1
ENSRNOG00000020990	FGF21	chr1:102674358-102675602	627	3.17316	5.62673	3.93495	2.5273	-0.140898	0.81704	1
ENSRNOG00000008960	FGF22	chr7:12999988-13001879	489	2.11544	0	0.655826	2.5273	0.14331	0.754866	1
ENSRNOG00000020888	FGF3	chr1:224872402-224876327	738	0	0	0	0	0	1	1
ENSRNOG00000020890	FGF4	chr1:224895195-224896606	587	0	0	0	0	0	1	1
ENSRNOG00000022631	FGF5	chr14:12917741-12938405	801	0	0	0	0	0	1	1
ENSRNOG00000017524	FGF8	chr1:272923588-272929296	615	0	0	0	0	0	1	1
ENSRNOG00000002418	TGFB2	chr13:109681281-109791576	2865	56.0592	105.501	156.087	110.359	0.597084	0.150104	0.326944
ENSRNOG00000015331	GDF3	chr4:222441202-222445535	1917	3.17316	4.22004	1.96748	2.5273	-0.156021	0.789476	1
ENSRNOG00000010695	PDGFC	chr2:199362290-199537365	1116	44.4242	30.947	91.8156	47.1763	0.692933	0.156762	0.3361
ENSRNOG00000006046	GDF7	chr6:43288342-43292667	1660	1.05772	0	1.31165	2.5273	0.243923	0.578621	1
ENSRNOG00000007301	GDF9	chr10:38570720-38574669	1388	1.05772	4.22004	1.31165	0.842434	-0.261793	0.608317	1
ENSRNOG00000007610	GDF11	chr7:3280684-3286883	1218	3.17316	2.81336	16.3956	7.58191	0.899767	0.156989	1
ENSRNOG00000050123	GDF5	chr3:157849769-157852905	893	0	0	3.27913	5.89704	0.614498	0.209518	1
ENSRNOG00000017348	IL2	chr2:143460865-143465570	740	7.40404	5.62673	2.6233	3.36974	-0.449067	0.470582	1
ENSRNOG00000007365	IL22	chr7:61232295-61236761	540	1.05772	0	0	0.842434	-0.00164696	0.995688	1
ENSRNOG00000026786	IL3	chr10:39397781-39400192	553	0	0	0	0	0	1	1
ENSRNOG00000007624	IL4	chr10:38745705-38751258	475	1.05772	0	0	0.842434	-0.00164696	0.995688	1
ENSRNOG00000008111	IL5	chr10:38848653-38851525	399	0	0	0	0	0	1	1
ENSRNOG00000010278	IL6	chr4:3095535-3100112	1045	0	0	1.96748	5.05461	0.486538	0.281285	1
ENSRNOG00000012131	IL9	chr17:10733180-10736304	563	0	0	0	0	0	1	1
ENSRNOG00000014320	INHBA	chr17:49965504-49978776	1546	0	0	5.90243	1.68487	0.539895	0.249186	1
ENSRNOG00000007700	INHBC	chr7:70822284-70835753	1981	0	0	0	0	0	1	1
ENSRNOG00000003263	LEFTY2	chr13:104212317-104215251	1108	0	0	0	0	0	1	1
ENSRNOG00000045797	LEP	chr4:56085078-56099209	3290	0	21.1002	0	1.68487	-0.69096	0.209057	1
ENSRNOG00000021294	MSTN	chr9:52975921-52982322	2704	0	1.40668	2.6233	4.21217	0.464702	0.359593	1
ENSRNOG00000000556	NODAL	chr20:32822879-32831247	2034	0	0	0.655826	0	0	1	1
ENSRNOG00000020783	NTF4	chr1:102484723-102487555	1326	4.23088	7.03341	8.52573	14.3214	0.525919	0.408498	1
ENSRNOG00000024390	OSM	chr14:85147854-85150705	720	2.11544	5.62673	3.93495	14.3214	0.472848	0.45152	1
ENSRNOG00000018201	PROK1	chr2:229457382-229462641	318	0	0	0	0	0	1	1
ENSRNOG00000049171	PSPN	chr9:9045405-9045964	471	8.46176	5.62673	3.93495	10.9516	0.0309016	0.961213	1
ENSRNOG00000037171	TDGF1	chr8:118555009-118558562	516	1.05772	2.81336	1.31165	2.5273	-0.00570614	0.991376	1
ENSRNOG00000001164	TFF1	chr20:12071834-12075695	462	1.05772	4.22004	0.655826	2.5273	-0.0810575	0.880542	1
